# Supplementary material for: Synthesis of azetidines via visible-light-mediated intermolecular [2+2] photocycloadditions
Source: Springer Nature journal article supplement (doi:10.1038/s41557-020-0541-1), 2020-09-23
Supplement: 41557_2020_541_MOESM72_ESM.cif [file 41557_2020_541_MOESM72_ESM.cif]

 
data_mrb1162 
  
_audit_creation_method            'SHELXL-2018/3' 
_shelx_SHELXL_version_number      '2018/3' 
_chemical_name_systematic         ? 
_chemical_name_common             ? 
_chemical_melting_point           ? 
_chemical_formula_moiety          '2(C21 H34 N2 O5), C6 H12' 
_chemical_formula_sum 
 'C48 H80 N4 O10' 
_chemical_formula_weight          873.16 
  
loop_ 
 _atom_type_symbol 
 _atom_type_description 
 _atom_type_scat_dispersion_real 
 _atom_type_scat_dispersion_imag 
 _atom_type_scat_source 
 'C'  'C'   0.0181   0.0091 
 'International Tables Vol C Tables 4.2.6.8 and 6.1.1.4' 
 'H'  'H'   0.0000   0.0000 
 'International Tables Vol C Tables 4.2.6.8 and 6.1.1.4' 
 'N'  'N'   0.0311   0.0180 
 'International Tables Vol C Tables 4.2.6.8 and 6.1.1.4' 
 'O'  'O'   0.0492   0.0322 
 'International Tables Vol C Tables 4.2.6.8 and 6.1.1.4' 
  
_space_group_crystal_system       monoclinic 
_space_group_IT_number            7 
_space_group_name_H-M_alt         'P n' 
_space_group_name_Hall            'P -2yac' 
  
_shelx_space_group_comment 
; 
The symmetry employed for this shelxl refinement is uniquely defined 
by the following loop, which should always be used as a source of 
symmetry information in preference to the above space-group names. 
They are only intended as comments. 
; 
  
loop_ 
 _space_group_symop_operation_xyz 
 'x, y, z' 
 'x+1/2, -y, z+1/2' 
  
_cell_length_a                    17.6585(2) 
_cell_length_b                    6.09660(10) 
_cell_length_c                    22.7527(3) 
_cell_angle_alpha                 90 
_cell_angle_beta                  98.4520(10) 
_cell_angle_gamma                 90 
_cell_volume                      2422.88(6) 
_cell_formula_units_Z             2 
_cell_measurement_temperature     85(2) 
_cell_measurement_reflns_used     15622 
_cell_measurement_theta_min       2.9490 
_cell_measurement_theta_max       68.7980 
  
_exptl_crystal_description        needle 
_exptl_crystal_colour             colourless 
_exptl_crystal_density_meas       ? 
_exptl_crystal_density_method     ? 
_exptl_crystal_density_diffrn     1.197 
_exptl_crystal_F_000              952 
_exptl_transmission_factor_min    ? 
_exptl_transmission_factor_max    ? 
_exptl_crystal_size_max           0.130 
_exptl_crystal_size_mid           0.030 
_exptl_crystal_size_min           0.030 
_exptl_absorpt_coefficient_mu     0.669 
_shelx_estimated_absorpt_T_min    0.918 
_shelx_estimated_absorpt_T_max    0.980 
_exptl_absorpt_correction_type    multi-scan 
_exptl_absorpt_correction_T_min   0.78867 
_exptl_absorpt_correction_T_max   1.00000 
_exptl_absorpt_process_details     
; 
CrysAlisPro 1.171.38.41 (Rigaku Oxford Diffraction, 2015) 
Empirical absorption correction using spherical harmonics, 
 implemented in SCALE3 ABSPACK scaling algorithm. 
; 
_exptl_absorpt_special_details    ? 
_diffrn_ambient_temperature       85(2) 
_diffrn_radiation_wavelength      1.54184 
_diffrn_radiation_type            CuK\a 
_diffrn_source                    'micro-focus rotating anode' 
_diffrn_measurement_device_type   'Rigaku Saturn 944+ CCD' 
_diffrn_measurement_method        '\w scans' 
_diffrn_detector_area_resol_mean  ? 
_diffrn_reflns_number             35611 
_diffrn_reflns_av_unetI/netI      0.0444 
_diffrn_reflns_av_R_equivalents   0.0621 
_diffrn_reflns_limit_h_min        -21 
_diffrn_reflns_limit_h_max        20 
_diffrn_reflns_limit_k_min        -7 
_diffrn_reflns_limit_k_max        7 
_diffrn_reflns_limit_l_min        -25 
_diffrn_reflns_limit_l_max        27 
_diffrn_reflns_theta_min          2.966 
_diffrn_reflns_theta_max          69.343 
_diffrn_reflns_theta_full         67.684 
_diffrn_measured_fraction_theta_max   0.992 
_diffrn_measured_fraction_theta_full  1.000 
_diffrn_reflns_Laue_measured_fraction_max    0.992 
_diffrn_reflns_Laue_measured_fraction_full   1.000 
_diffrn_reflns_point_group_measured_fraction_max   0.924 
_diffrn_reflns_point_group_measured_fraction_full  0.939 
_reflns_number_total              8411 
_reflns_number_gt                 8004 
_reflns_threshold_expression      'I > 2\s(I)' 
_reflns_Friedel_coverage          0.862 
_reflns_Friedel_fraction_max      0.856 
_reflns_Friedel_fraction_full     0.878 
  
_reflns_special_details 
; 
 Reflections were merged by SHELXL according to the crystal 
 class for the calculation of statistics and refinement. 
  
 _reflns_Friedel_fraction is defined as the number of unique 
 Friedel pairs measured divided by the number that would be 
 possible theoretically, ignoring centric projections and 
 systematic absences. Completness statistics refer to single and 
 composite reflections containing twin component 1 only. 
; 
  
_computing_data_collection        'CrysAlisPro 1.171.38.41 (Rigaku OD, 2015)' 
_computing_cell_refinement        'CrysAlisPro 1.171.38.41 (Rigaku OD, 2015)' 
_computing_data_reduction         'CrysAlisPro 1.171.38.41 (Rigaku OD, 2015)' 
_computing_structure_solution   'SHELXT (Sheldrick, 2014)'  
_computing_structure_refinement 'SHELXL-2018/3 (Sheldrick, 2008)' 
_computing_molecular_graphics     'Bruker SHELXTL'
_computing_publication_material   'Bruker SHELXTL'

_refine_special_details 
; 
 Refined as a 2-component inversion twin. 

 Methylcyclopentane is present in hexanes as an impurity
; 
_refine_ls_structure_factor_coef  Fsqd 
_refine_ls_matrix_type            full 
_refine_ls_weighting_scheme       calc 
_refine_ls_weighting_details 
'w=1/[\s^2^(Fo^2^)+(0.0585P)^2^+0.5739P] where P=(Fo^2^+2Fc^2^)/3' 
_atom_sites_solution_primary      ? 
_atom_sites_solution_secondary    ? 
_atom_sites_solution_hydrogens    geom 
_refine_ls_hydrogen_treatment     constr 
_refine_ls_extinction_method      none 
_refine_ls_extinction_coef        . 
_refine_ls_abs_structure_details 
; 
 Refined as an inversion twin. 
; 
_refine_ls_abs_structure_Flack    0.4(2) 
_chemical_absolute_configuration  syn 
_refine_ls_number_reflns          8411 
_refine_ls_number_parameters      573 
_refine_ls_number_restraints      2 
_refine_ls_R_factor_all           0.0435 
_refine_ls_R_factor_gt            0.0414 
_refine_ls_wR_factor_ref          0.1115 
_refine_ls_wR_factor_gt           0.1080 
_refine_ls_goodness_of_fit_ref    1.043 
_refine_ls_restrained_S_all       1.043 
_refine_ls_shift/su_max           0.000 
_refine_ls_shift/su_mean          0.000 
  
loop_ 
 _atom_site_label 
 _atom_site_type_symbol 
 _atom_site_fract_x 
 _atom_site_fract_y 
 _atom_site_fract_z 
 _atom_site_U_iso_or_equiv 
 _atom_site_adp_type 
 _atom_site_occupancy 
 _atom_site_site_symmetry_order 
 _atom_site_calc_flag 
 _atom_site_refinement_flags_posn 
 _atom_site_refinement_flags_adp 
 _atom_site_refinement_flags_occupancy 
 _atom_site_disorder_assembly 
 _atom_site_disorder_group 
O1 O 1.01894(11) 0.6096(3) 0.71605(9) 0.0197(4) Uani 1 1 d . . . . . 
O2 O 1.08314(11) 0.5388(3) 0.63751(10) 0.0203(4) Uani 1 1 d . . . . . 
O3 O 0.81365(11) 1.0015(3) 0.48078(9) 0.0182(4) Uani 1 1 d . . . . . 
O4 O 0.60489(12) 0.5976(4) 0.46689(12) 0.0318(5) Uani 1 1 d . . . . . 
O5 O 0.64184(12) 0.7618(4) 0.55464(10) 0.0258(5) Uani 1 1 d . . . . . 
O6 O -0.01849(11) 0.5017(3) 0.28302(9) 0.0198(4) Uani 1 1 d . . . . . 
O7 O -0.08121(11) 0.5725(3) 0.36217(10) 0.0217(4) Uani 1 1 d . . . . . 
O8 O 0.18339(11) 0.1025(3) 0.51722(9) 0.0185(4) Uani 1 1 d . . . . . 
O9 O 0.39221(12) 0.5048(4) 0.53198(11) 0.0287(5) Uani 1 1 d . . . . . 
O10 O 0.35252(12) 0.3453(4) 0.44380(11) 0.0286(5) Uani 1 1 d . . . . . 
N1 N 0.98769(12) 0.7937(4) 0.63152(11) 0.0178(5) Uani 1 1 d . . . . . 
N2 N 0.78391(13) 0.8718(4) 0.52699(11) 0.0170(5) Uani 1 1 d . . . . . 
N3 N 0.01041(13) 0.3092(4) 0.36626(11) 0.0178(5) Uani 1 1 d . . . . . 
N4 N 0.21288(13) 0.2339(4) 0.47199(11) 0.0173(5) Uani 1 1 d . . . . . 
C1 C 1.07504(16) 0.5023(5) 0.76118(14) 0.0196(6) Uani 1 1 d . . . . . 
C2 C 1.15370(17) 0.6084(6) 0.76280(16) 0.0312(8) Uani 1 1 d . . . . . 
H2A H 1.148594 0.768217 0.764481 0.047 Uiso 1 1 calc R U . . . 
H2B H 1.175121 0.567646 0.726959 0.047 Uiso 1 1 calc R U . . . 
H2C H 1.187858 0.557275 0.798009 0.047 Uiso 1 1 calc R U . . . 
C3 C 1.04251(18) 0.5497(6) 0.81786(15) 0.0254(7) Uani 1 1 d . . . . . 
H3A H 0.990959 0.487270 0.814964 0.038 Uiso 1 1 calc R U . . . 
H3B H 1.039984 0.708733 0.823622 0.038 Uiso 1 1 calc R U . . . 
H3C H 1.075533 0.483952 0.851650 0.038 Uiso 1 1 calc R U . . . 
C4 C 1.0770(2) 0.2569(6) 0.74986(17) 0.0316(8) Uani 1 1 d . . . . . 
H4A H 1.095665 0.229955 0.711996 0.047 Uiso 1 1 calc R U . . . 
H4B H 1.025382 0.196251 0.748189 0.047 Uiso 1 1 calc R U . . . 
H4C H 1.111395 0.186239 0.782085 0.047 Uiso 1 1 calc R U . . . 
C5 C 1.03396(15) 0.6370(5) 0.65978(13) 0.0175(6) Uani 1 1 d . . . . . 
C6 C 0.98239(16) 0.8395(5) 0.56830(13) 0.0178(6) Uani 1 1 d . . . . . 
H6 H 1.032820 0.816706 0.554152 0.021 Uiso 1 1 calc R U . . . 
C7 C 0.92039(15) 0.6909(5) 0.53462(14) 0.0174(6) Uani 1 1 d . . . . . 
H7A H 0.938525 0.537170 0.537912 0.021 Uiso 1 1 calc R U . . . 
H7B H 0.913191 0.731318 0.492013 0.021 Uiso 1 1 calc R U . . . 
C8 C 0.84273(15) 0.7047(5) 0.55719(14) 0.0173(6) Uani 1 1 d . . . . . 
C9 C 0.85128(16) 0.7328(5) 0.62476(13) 0.0171(6) Uani 1 1 d . . . . . 
H9A H 0.802948 0.792692 0.635347 0.020 Uiso 1 1 calc R U . . . 
H9B H 0.859688 0.586963 0.643748 0.020 Uiso 1 1 calc R U . . . 
C10 C 0.91736(15) 0.8847(5) 0.64968(14) 0.0169(6) Uani 1 1 d . . . . . 
H10 H 0.921861 0.899279 0.693834 0.020 Uiso 1 1 calc R U . . . 
C11 C 0.91309(16) 1.1104(5) 0.61882(14) 0.0197(6) Uani 1 1 d . . . . . 
H11A H 0.935194 1.225976 0.646745 0.024 Uiso 1 1 calc R U . . . 
H11B H 0.859389 1.149232 0.603447 0.024 Uiso 1 1 calc R U . . . 
C12 C 0.96066(16) 1.0837(5) 0.56714(14) 0.0196(6) Uani 1 1 d . . . . . 
H12A H 0.929877 1.123533 0.528687 0.023 Uiso 1 1 calc R U . . . 
H12B H 1.007001 1.177140 0.573558 0.023 Uiso 1 1 calc R U . . . 
C13 C 0.76384(16) 0.9600(5) 0.42525(14) 0.0182(6) Uani 1 1 d . . . . . 
C14 C 0.74870(17) 0.7126(5) 0.42957(15) 0.0196(6) Uani 1 1 d . . . . . 
H14A H 0.702035 0.668227 0.402601 0.024 Uiso 1 1 calc R U . . . 
H14B H 0.792737 0.625198 0.420400 0.024 Uiso 1 1 calc R U . . . 
C15 C 0.73812(15) 0.6889(5) 0.49439(14) 0.0183(6) Uani 1 1 d . . . . . 
C16 C 0.78698(17) 0.5173(5) 0.53306(15) 0.0200(6) Uani 1 1 d . . . . . 
H16A H 0.810287 0.405088 0.509843 0.024 Uiso 1 1 calc R U . . . 
H16B H 0.760356 0.448351 0.563696 0.024 Uiso 1 1 calc R U . . . 
C17 C 0.80869(17) 1.0228(5) 0.37637(15) 0.0222(6) Uani 1 1 d . . . . . 
H17A H 0.854648 0.931140 0.378846 0.033 Uiso 1 1 calc R U . . . 
H17B H 0.823687 1.177369 0.380721 0.033 Uiso 1 1 calc R U . . . 
H17C H 0.776924 1.000698 0.337737 0.033 Uiso 1 1 calc R U . . . 
C18 C 0.69071(16) 1.0950(5) 0.42321(15) 0.0212(6) Uani 1 1 d . . . . . 
H18A H 0.702752 1.250975 0.419840 0.032 Uiso 1 1 calc R U . . . 
H18B H 0.668523 1.070334 0.459684 0.032 Uiso 1 1 calc R U . . . 
H18C H 0.653892 1.050304 0.388789 0.032 Uiso 1 1 calc R U . . . 
C19 C 0.65408(16) 0.6811(5) 0.50272(14) 0.0199(6) Uani 1 1 d . . . . . 
C20 C 0.56353(18) 0.7445(6) 0.56782(17) 0.0309(8) Uani 1 1 d . . . . . 
H20A H 0.553276 0.593599 0.580621 0.037 Uiso 1 1 calc R U . . . 
H20B H 0.526470 0.780192 0.532087 0.037 Uiso 1 1 calc R U . . . 
C21 C 0.5562(2) 0.9041(7) 0.6165(2) 0.0425(9) Uani 1 1 d . . . . . 
H21A H 0.569397 1.051508 0.604184 0.064 Uiso 1 1 calc R U . . . 
H21B H 0.590924 0.861829 0.652366 0.064 Uiso 1 1 calc R U . . . 
H21C H 0.503338 0.903648 0.625035 0.064 Uiso 1 1 calc R U . . . 
C22 C -0.07101(16) 0.6292(5) 0.23958(15) 0.0202(6) Uani 1 1 d . . . . . 
C23 C -0.04207(19) 0.5743(6) 0.18161(15) 0.0278(7) Uani 1 1 d . . . . . 
H23A H -0.048551 0.416971 0.173533 0.042 Uiso 1 1 calc R U . . . 
H23B H 0.012280 0.612594 0.184810 0.042 Uiso 1 1 calc R U . . . 
H23C H -0.071282 0.657849 0.149105 0.042 Uiso 1 1 calc R U . . . 
C24 C -0.0622(2) 0.8721(5) 0.25352(15) 0.0277(7) Uani 1 1 d . . . . . 
H24A H -0.009210 0.916896 0.251918 0.042 Uiso 1 1 calc R U . . . 
H24B H -0.074752 0.900177 0.293385 0.042 Uiso 1 1 calc R U . . . 
H24C H -0.096835 0.956168 0.224273 0.042 Uiso 1 1 calc R U . . . 
C25 C -0.15303(18) 0.5507(6) 0.23798(16) 0.0285(7) Uani 1 1 d . . . . . 
H25A H -0.172008 0.596314 0.274459 0.043 Uiso 1 1 calc R U . . . 
H25B H -0.154652 0.390386 0.234906 0.043 Uiso 1 1 calc R U . . . 
H25C H -0.185298 0.614812 0.203527 0.043 Uiso 1 1 calc R U . . . 
C26 C -0.03358(15) 0.4719(5) 0.33942(13) 0.0168(6) Uani 1 1 d . . . . . 
C27 C 0.01518(15) 0.2628(5) 0.43000(13) 0.0172(6) Uani 1 1 d . . . . . 
H27 H -0.035589 0.283315 0.443758 0.021 Uiso 1 1 calc R U . . . 
C28 C 0.07619(15) 0.4132(5) 0.46415(13) 0.0170(6) Uani 1 1 d . . . . . 
H28A H 0.057298 0.566281 0.460917 0.020 Uiso 1 1 calc R U . . . 
H28B H 0.083181 0.372209 0.506707 0.020 Uiso 1 1 calc R U . . . 
C29 C 0.15414(16) 0.4034(4) 0.44210(13) 0.0163(6) Uani 1 1 d . . . . . 
C30 C 0.14636(15) 0.3779(5) 0.37452(13) 0.0170(6) Uani 1 1 d . . . . . 
H30A H 0.195315 0.322205 0.364039 0.020 Uiso 1 1 calc R U . . . 
H30B H 0.136826 0.523919 0.355849 0.020 Uiso 1 1 calc R U . . . 
C31 C 0.08178(15) 0.2223(5) 0.34895(14) 0.0183(6) Uani 1 1 d . . . . . 
H31 H 0.078270 0.206552 0.304882 0.022 Uiso 1 1 calc R U . . . 
C32 C 0.08769(16) -0.0025(5) 0.38069(14) 0.0189(6) Uani 1 1 d . . . . . 
H32A H 0.141507 -0.035742 0.397182 0.023 Uiso 1 1 calc R U . . . 
H32B H 0.067902 -0.120887 0.352808 0.023 Uiso 1 1 calc R U . . . 
C33 C 0.03804(16) 0.0199(5) 0.43107(14) 0.0184(6) Uani 1 1 d . . . . . 
H33A H -0.007796 -0.075172 0.423455 0.022 Uiso 1 1 calc R U . . . 
H33B H 0.067744 -0.020150 0.469927 0.022 Uiso 1 1 calc R U . . . 
C34 C 0.23337(16) 0.1405(5) 0.57289(14) 0.0179(6) Uani 1 1 d . . . . . 
C35 C 0.24837(16) 0.3879(5) 0.56979(14) 0.0187(6) Uani 1 1 d . . . . . 
H35A H 0.204362 0.474168 0.579506 0.022 Uiso 1 1 calc R U . . . 
H35B H 0.295120 0.430911 0.596846 0.022 Uiso 1 1 calc R U . . . 
C36 C 0.25859(15) 0.4159(5) 0.50517(14) 0.0181(6) Uani 1 1 d . . . . . 
C37 C 0.20931(16) 0.5882(5) 0.46733(14) 0.0194(6) Uani 1 1 d . . . . . 
H37A H 0.235885 0.660351 0.437141 0.023 Uiso 1 1 calc R U . . . 
H37B H 0.185741 0.698045 0.491099 0.023 Uiso 1 1 calc R U . . . 
C38 C 0.30590(16) 0.0035(5) 0.57470(15) 0.0209(6) Uani 1 1 d . . . . . 
H38A H 0.330283 0.036525 0.539704 0.031 Uiso 1 1 calc R U . . . 
H38B H 0.292727 -0.152611 0.574759 0.031 Uiso 1 1 calc R U . . . 
H38C H 0.341333 0.038624 0.610785 0.031 Uiso 1 1 calc R U . . . 
C39 C 0.18804(17) 0.0724(5) 0.62175(15) 0.0233(6) Uani 1 1 d . . . . . 
H39A H 0.172930 -0.081838 0.616357 0.035 Uiso 1 1 calc R U . . . 
H39B H 0.142146 0.164001 0.619876 0.035 Uiso 1 1 calc R U . . . 
H39C H 0.219802 0.091015 0.660527 0.035 Uiso 1 1 calc R U . . . 
C40 C 0.34223(17) 0.4240(5) 0.49674(14) 0.0214(6) Uani 1 1 d . . . . . 
C41 C 0.43077(18) 0.3500(7) 0.43026(18) 0.0372(9) Uani 1 1 d . . . . . 
H41A H 0.455860 0.488528 0.445177 0.045 Uiso 1 1 calc R U . . . 
H41B H 0.429870 0.344956 0.386672 0.045 Uiso 1 1 calc R U . . . 
C42 C 0.4752(2) 0.1605(8) 0.4582(2) 0.0535(12) Uani 1 1 d . . . . . 
H42A H 0.450097 0.023583 0.443673 0.080 Uiso 1 1 calc R U . . . 
H42B H 0.477600 0.168634 0.501499 0.080 Uiso 1 1 calc R U . . . 
H42C H 0.527190 0.164454 0.448023 0.080 Uiso 1 1 calc R U . . . 
C43 C 0.1965(3) 0.5995(10) 0.2028(3) 0.0752(16) Uani 1 1 d . . . . . 
H43A H 0.166767 0.671245 0.168374 0.113 Uiso 1 1 calc R U . . . 
H43B H 0.162496 0.561561 0.231703 0.113 Uiso 1 1 calc R U . . . 
H43C H 0.220115 0.465845 0.189977 0.113 Uiso 1 1 calc R U . . . 
C44 C 0.2584(3) 0.7543(10) 0.2315(3) 0.0668(15) Uani 1 1 d . . . . . 
H44 H 0.282718 0.824050 0.199090 0.080 Uiso 1 1 calc R U . . . 
C45 C 0.2315(3) 0.9329(10) 0.2682(3) 0.0727(15) Uani 1 1 d . . . . . 
H45A H 0.192859 0.876856 0.291917 0.087 Uiso 1 1 calc R U . . . 
H45B H 0.208652 1.054689 0.242782 0.087 Uiso 1 1 calc R U . . . 
C46 C 0.3030(4) 1.0083(12) 0.3084(4) 0.100(2) Uani 1 1 d . . . . . 
H46A H 0.325722 1.135746 0.290375 0.120 Uiso 1 1 calc R U . . . 
H46B H 0.289926 1.053541 0.347420 0.120 Uiso 1 1 calc R U . . . 
C47 C 0.3581(4) 0.8266(13) 0.3161(3) 0.095(2) Uani 1 1 d . . . . . 
H47A H 0.366446 0.775847 0.357890 0.114 Uiso 1 1 calc R U . . . 
H47B H 0.407860 0.872423 0.304932 0.114 Uiso 1 1 calc R U . . . 
C48 C 0.3212(3) 0.6425(11) 0.2741(3) 0.0847(19) Uani 1 1 d . . . . . 
H48A H 0.359714 0.575314 0.252159 0.102 Uiso 1 1 calc R U . . . 
H48B H 0.299363 0.526574 0.297108 0.102 Uiso 1 1 calc R U . . . 
  
loop_ 
 _atom_site_aniso_label 
 _atom_site_aniso_U_11 
 _atom_site_aniso_U_22 
 _atom_site_aniso_U_33 
 _atom_site_aniso_U_23 
 _atom_site_aniso_U_13 
 _atom_site_aniso_U_12 
O1 0.0171(9) 0.0261(11) 0.0154(11) 0.0049(9) 0.0003(8) 0.0051(8) 
O2 0.0187(9) 0.0214(10) 0.0207(11) -0.0005(9) 0.0028(8) 0.0064(8) 
O3 0.0185(9) 0.0161(10) 0.0183(11) 0.0023(8) -0.0031(8) -0.0027(7) 
O4 0.0185(10) 0.0440(15) 0.0319(14) -0.0111(11) 0.0003(9) -0.0064(9) 
O5 0.0191(10) 0.0330(12) 0.0261(12) -0.0062(10) 0.0060(9) -0.0048(9) 
O6 0.0186(9) 0.0261(11) 0.0141(11) 0.0043(8) 0.0000(8) 0.0062(8) 
O7 0.0199(10) 0.0241(11) 0.0212(12) 0.0014(9) 0.0029(8) 0.0065(8) 
O8 0.0187(9) 0.0186(10) 0.0166(11) 0.0019(8) -0.0027(8) -0.0024(7) 
O9 0.0164(10) 0.0377(14) 0.0299(13) -0.0032(10) -0.0035(9) -0.0064(9) 
O10 0.0181(10) 0.0389(13) 0.0294(13) -0.0022(10) 0.0053(9) -0.0035(9) 
N1 0.0146(11) 0.0209(12) 0.0175(13) 0.0008(10) 0.0010(9) 0.0018(9) 
N2 0.0164(11) 0.0158(11) 0.0182(13) 0.0014(10) 0.0000(9) -0.0006(9) 
N3 0.0154(11) 0.0211(12) 0.0168(13) 0.0015(10) 0.0014(9) 0.0042(9) 
N4 0.0158(11) 0.0160(12) 0.0187(13) 0.0012(10) -0.0024(10) -0.0004(9) 
C1 0.0181(13) 0.0217(15) 0.0174(16) 0.0040(12) -0.0026(11) 0.0049(11) 
C2 0.0178(15) 0.047(2) 0.0272(19) 0.0066(16) -0.0014(13) 0.0019(13) 
C3 0.0243(15) 0.0330(17) 0.0181(16) 0.0016(13) 0.0005(12) 0.0025(12) 
C4 0.044(2) 0.0254(18) 0.0251(19) 0.0051(14) 0.0054(15) 0.0103(14) 
C5 0.0159(13) 0.0190(13) 0.0168(15) 0.0004(12) -0.0006(11) -0.0020(11) 
C6 0.0165(13) 0.0211(15) 0.0153(15) 0.0016(12) 0.0011(11) 0.0006(11) 
C7 0.0177(13) 0.0161(14) 0.0177(15) 0.0006(11) 0.0009(11) 0.0029(10) 
C8 0.0169(13) 0.0151(13) 0.0193(15) -0.0018(11) 0.0006(11) 0.0007(11) 
C9 0.0155(12) 0.0165(13) 0.0190(15) 0.0008(11) 0.0020(11) 0.0022(10) 
C10 0.0142(13) 0.0184(14) 0.0177(15) -0.0014(12) 0.0011(11) 0.0022(10) 
C11 0.0194(14) 0.0156(14) 0.0231(17) -0.0016(12) -0.0003(12) 0.0005(11) 
C12 0.0174(13) 0.0187(15) 0.0218(17) 0.0012(12) 0.0000(11) -0.0013(10) 
C13 0.0163(13) 0.0192(14) 0.0178(15) -0.0016(12) -0.0025(11) 0.0015(11) 
C14 0.0178(13) 0.0168(14) 0.0232(16) -0.0026(12) -0.0002(11) 0.0006(11) 
C15 0.0158(13) 0.0173(14) 0.0205(16) -0.0029(12) -0.0017(11) -0.0008(10) 
C16 0.0201(14) 0.0145(14) 0.0241(17) -0.0005(12) -0.0014(12) -0.0004(11) 
C17 0.0197(14) 0.0234(15) 0.0224(17) 0.0012(13) -0.0007(12) 0.0001(11) 
C18 0.0186(14) 0.0200(15) 0.0236(17) -0.0003(12) -0.0018(12) 0.0037(11) 
C19 0.0198(14) 0.0172(14) 0.0221(16) -0.0009(12) 0.0009(12) -0.0008(11) 
C20 0.0226(16) 0.0345(19) 0.038(2) -0.0017(16) 0.0114(14) -0.0045(13) 
C21 0.042(2) 0.041(2) 0.048(2) -0.0082(18) 0.0212(18) -0.0032(16) 
C22 0.0174(14) 0.0244(15) 0.0171(16) 0.0017(12) -0.0038(11) 0.0035(11) 
C23 0.0298(16) 0.0335(17) 0.0194(17) 0.0024(13) 0.0015(13) 0.0052(13) 
C24 0.0352(17) 0.0229(15) 0.0233(17) 0.0048(13) -0.0017(13) 0.0029(13) 
C25 0.0213(15) 0.0384(18) 0.0236(18) 0.0030(14) -0.0037(13) -0.0011(13) 
C26 0.0148(12) 0.0182(13) 0.0161(15) 0.0016(12) -0.0019(11) 0.0010(11) 
C27 0.0157(13) 0.0194(15) 0.0157(15) 0.0026(11) 0.0004(11) 0.0012(11) 
C28 0.0179(13) 0.0172(14) 0.0164(15) 0.0017(11) 0.0045(11) 0.0013(11) 
C29 0.0165(13) 0.0123(13) 0.0193(15) 0.0028(11) 0.0004(11) 0.0020(10) 
C30 0.0159(13) 0.0176(13) 0.0176(15) 0.0027(11) 0.0027(11) 0.0021(10) 
C31 0.0150(13) 0.0215(14) 0.0178(15) 0.0009(12) 0.0011(11) 0.0030(11) 
C32 0.0188(14) 0.0167(14) 0.0200(16) -0.0029(12) -0.0015(12) 0.0010(10) 
C33 0.0159(13) 0.0180(15) 0.0202(16) 0.0017(12) -0.0004(11) -0.0022(10) 
C34 0.0162(13) 0.0187(14) 0.0170(15) -0.0019(12) -0.0041(11) -0.0006(11) 
C35 0.0194(13) 0.0163(14) 0.0193(16) -0.0010(12) -0.0011(11) -0.0007(10) 
C36 0.0158(13) 0.0149(14) 0.0225(16) -0.0004(12) -0.0015(11) -0.0014(10) 
C37 0.0172(13) 0.0184(14) 0.0216(16) 0.0014(12) -0.0010(11) -0.0005(11) 
C38 0.0187(13) 0.0188(15) 0.0236(17) -0.0006(12) -0.0018(12) 0.0005(11) 
C39 0.0225(14) 0.0228(15) 0.0242(18) 0.0004(13) 0.0016(13) -0.0021(11) 
C40 0.0224(14) 0.0194(15) 0.0219(16) 0.0031(13) 0.0012(12) 0.0001(11) 
C41 0.0218(16) 0.056(2) 0.037(2) -0.0003(18) 0.0127(15) -0.0010(15) 
C42 0.0314(19) 0.063(3) 0.070(3) 0.005(2) 0.019(2) 0.0122(18) 
C43 0.055(3) 0.076(4) 0.096(5) -0.012(3) 0.015(3) 0.015(3) 
C44 0.050(3) 0.085(4) 0.068(4) 0.001(3) 0.018(2) 0.009(2) 
C45 0.057(3) 0.078(4) 0.082(4) -0.011(3) 0.006(3) 0.021(3) 
C46 0.074(4) 0.084(4) 0.137(7) -0.037(4) -0.004(4) 0.025(3) 
C47 0.070(4) 0.115(5) 0.093(5) -0.030(4) -0.008(3) 0.040(4) 
C48 0.064(3) 0.078(4) 0.106(5) -0.012(4) -0.010(3) 0.028(3) 
  
_geom_special_details 
; 
 All esds (except the esd in the dihedral angle between two l.s. planes) 
 are estimated using the full covariance matrix.  The cell esds are taken 
 into account individually in the estimation of esds in distances, angles 
 and torsion angles; correlations between esds in cell parameters are only 
 used when they are defined by crystal symmetry.  An approximate (isotropic) 
 treatment of cell esds is used for estimating esds involving l.s. planes. 
; 
  
loop_ 
 _geom_bond_atom_site_label_1 
 _geom_bond_atom_site_label_2 
 _geom_bond_distance 
 _geom_bond_site_symmetry_2 
 _geom_bond_publ_flag 
O1 C5 1.355(4) . ? 
O1 C1 1.471(4) . ? 
O2 C5 1.224(4) . ? 
O3 C13 1.452(4) . ? 
O3 N2 1.473(3) . ? 
O4 C19 1.212(4) . ? 
O5 C19 1.326(4) . ? 
O5 C20 1.461(4) . ? 
O6 C26 1.361(4) . ? 
O6 C22 1.474(4) . ? 
O7 C26 1.216(4) . ? 
O8 C34 1.452(4) . ? 
O8 N4 1.459(3) . ? 
O9 C40 1.207(4) . ? 
O10 C40 1.334(4) . ? 
O10 C41 1.460(4) . ? 
N1 C5 1.356(4) . ? 
N1 C6 1.455(4) . ? 
N1 C10 1.474(3) . ? 
N2 C15 1.507(4) . ? 
N2 C8 1.542(4) . ? 
N3 C26 1.350(4) . ? 
N3 C27 1.468(4) . ? 
N3 C31 1.473(3) . ? 
N4 C36 1.508(4) . ? 
N4 C29 1.549(4) . ? 
C1 C3 1.515(4) . ? 
C1 C4 1.519(4) . ? 
C1 C2 1.528(4) . ? 
C2 H2A 0.9800 . ? 
C2 H2B 0.9800 . ? 
C2 H2C 0.9800 . ? 
C3 H3A 0.9800 . ? 
C3 H3B 0.9800 . ? 
C3 H3C 0.9800 . ? 
C4 H4A 0.9800 . ? 
C4 H4B 0.9800 . ? 
C4 H4C 0.9800 . ? 
C6 C7 1.536(4) . ? 
C6 C12 1.537(4) . ? 
C6 H6 1.0000 . ? 
C7 C8 1.536(4) . ? 
C7 H7A 0.9900 . ? 
C7 H7B 0.9900 . ? 
C8 C9 1.532(4) . ? 
C8 C16 1.555(4) . ? 
C9 C10 1.532(4) . ? 
C9 H9A 0.9900 . ? 
C9 H9B 0.9900 . ? 
C10 C11 1.542(4) . ? 
C10 H10 1.0000 . ? 
C11 C12 1.551(4) . ? 
C11 H11A 0.9900 . ? 
C11 H11B 0.9900 . ? 
C12 H12A 0.9900 . ? 
C12 H12B 0.9900 . ? 
C13 C17 1.507(4) . ? 
C13 C18 1.526(4) . ? 
C13 C14 1.537(4) . ? 
C14 C15 1.520(4) . ? 
C14 H14A 0.9900 . ? 
C14 H14B 0.9900 . ? 
C15 C19 1.524(4) . ? 
C15 C16 1.546(4) . ? 
C16 H16A 0.9900 . ? 
C16 H16B 0.9900 . ? 
C17 H17A 0.9800 . ? 
C17 H17B 0.9800 . ? 
C17 H17C 0.9800 . ? 
C18 H18A 0.9800 . ? 
C18 H18B 0.9800 . ? 
C18 H18C 0.9800 . ? 
C20 C21 1.495(5) . ? 
C20 H20A 0.9900 . ? 
C20 H20B 0.9900 . ? 
C21 H21A 0.9800 . ? 
C21 H21B 0.9800 . ? 
C21 H21C 0.9800 . ? 
C22 C24 1.518(5) . ? 
C22 C23 1.520(5) . ? 
C22 C25 1.521(4) . ? 
C23 H23A 0.9800 . ? 
C23 H23B 0.9800 . ? 
C23 H23C 0.9800 . ? 
C24 H24A 0.9800 . ? 
C24 H24B 0.9800 . ? 
C24 H24C 0.9800 . ? 
C25 H25A 0.9800 . ? 
C25 H25B 0.9800 . ? 
C25 H25C 0.9800 . ? 
C27 C33 1.534(4) . ? 
C27 C28 1.536(4) . ? 
C27 H27 1.0000 . ? 
C28 C29 1.534(4) . ? 
C28 H28A 0.9900 . ? 
C28 H28B 0.9900 . ? 
C29 C30 1.531(4) . ? 
C29 C37 1.544(4) . ? 
C30 C31 1.531(4) . ? 
C30 H30A 0.9900 . ? 
C30 H30B 0.9900 . ? 
C31 C32 1.546(4) . ? 
C31 H31 1.0000 . ? 
C32 C33 1.548(4) . ? 
C32 H32A 0.9900 . ? 
C32 H32B 0.9900 . ? 
C33 H33A 0.9900 . ? 
C33 H33B 0.9900 . ? 
C34 C39 1.520(4) . ? 
C34 C38 1.524(4) . ? 
C34 C35 1.535(4) . ? 
C35 C36 1.517(4) . ? 
C35 H35A 0.9900 . ? 
C35 H35B 0.9900 . ? 
C36 C40 1.518(4) . ? 
C36 C37 1.543(4) . ? 
C37 H37A 0.9900 . ? 
C37 H37B 0.9900 . ? 
C38 H38A 0.9800 . ? 
C38 H38B 0.9800 . ? 
C38 H38C 0.9800 . ? 
C39 H39A 0.9800 . ? 
C39 H39B 0.9800 . ? 
C39 H39C 0.9800 . ? 
C41 C42 1.486(6) . ? 
C41 H41A 0.9900 . ? 
C41 H41B 0.9900 . ? 
C42 H42A 0.9800 . ? 
C42 H42B 0.9800 . ? 
C42 H42C 0.9800 . ? 
C43 C44 1.517(8) . ? 
C43 H43A 0.9800 . ? 
C43 H43B 0.9800 . ? 
C43 H43C 0.9800 . ? 
C44 C45 1.493(7) . ? 
C44 C48 1.524(8) . ? 
C44 H44 1.0000 . ? 
C45 C46 1.518(9) . ? 
C45 H45A 0.9900 . ? 
C45 H45B 0.9900 . ? 
C46 C47 1.467(9) . ? 
C46 H46A 0.9900 . ? 
C46 H46B 0.9900 . ? 
C47 C48 1.554(10) . ? 
C47 H47A 0.9900 . ? 
C47 H47B 0.9900 . ? 
C48 H48A 0.9900 . ? 
C48 H48B 0.9900 . ? 
  
loop_ 
 _geom_angle_atom_site_label_1 
 _geom_angle_atom_site_label_2 
 _geom_angle_atom_site_label_3 
 _geom_angle 
 _geom_angle_site_symmetry_1 
 _geom_angle_site_symmetry_3 
 _geom_angle_publ_flag 
C5 O1 C1 120.6(2) . . ? 
C13 O3 N2 107.08(19) . . ? 
C19 O5 C20 116.0(2) . . ? 
C26 O6 C22 120.8(2) . . ? 
C34 O8 N4 107.1(2) . . ? 
C40 O10 C41 116.2(3) . . ? 
C5 N1 C6 123.4(2) . . ? 
C5 N1 C10 127.3(2) . . ? 
C6 N1 C10 105.7(2) . . ? 
O3 N2 C15 105.5(2) . . ? 
O3 N2 C8 112.65(19) . . ? 
C15 N2 C8 90.46(19) . . ? 
C26 N3 C27 122.3(2) . . ? 
C26 N3 C31 127.0(2) . . ? 
C27 N3 C31 105.5(2) . . ? 
O8 N4 C36 105.7(2) . . ? 
O8 N4 C29 112.99(19) . . ? 
C36 N4 C29 90.2(2) . . ? 
O1 C1 C3 102.0(2) . . ? 
O1 C1 C4 110.5(3) . . ? 
C3 C1 C4 110.7(3) . . ? 
O1 C1 C2 110.2(2) . . ? 
C3 C1 C2 110.8(3) . . ? 
C4 C1 C2 112.2(3) . . ? 
C1 C2 H2A 109.5 . . ? 
C1 C2 H2B 109.5 . . ? 
H2A C2 H2B 109.5 . . ? 
C1 C2 H2C 109.5 . . ? 
H2A C2 H2C 109.5 . . ? 
H2B C2 H2C 109.5 . . ? 
C1 C3 H3A 109.5 . . ? 
C1 C3 H3B 109.5 . . ? 
H3A C3 H3B 109.5 . . ? 
C1 C3 H3C 109.5 . . ? 
H3A C3 H3C 109.5 . . ? 
H3B C3 H3C 109.5 . . ? 
C1 C4 H4A 109.5 . . ? 
C1 C4 H4B 109.5 . . ? 
H4A C4 H4B 109.5 . . ? 
C1 C4 H4C 109.5 . . ? 
H4A C4 H4C 109.5 . . ? 
H4B C4 H4C 109.5 . . ? 
O2 C5 O1 125.5(3) . . ? 
O2 C5 N1 124.2(3) . . ? 
O1 C5 N1 110.3(2) . . ? 
N1 C6 C7 108.5(2) . . ? 
N1 C6 C12 100.5(2) . . ? 
C7 C6 C12 113.9(2) . . ? 
N1 C6 H6 111.1 . . ? 
C7 C6 H6 111.1 . . ? 
C12 C6 H6 111.1 . . ? 
C6 C7 C8 114.0(2) . . ? 
C6 C7 H7A 108.7 . . ? 
C8 C7 H7A 108.7 . . ? 
C6 C7 H7B 108.7 . . ? 
C8 C7 H7B 108.7 . . ? 
H7A C7 H7B 107.6 . . ? 
C9 C8 C7 112.4(2) . . ? 
C9 C8 N2 109.5(2) . . ? 
C7 C8 N2 117.6(2) . . ? 
C9 C8 C16 113.6(2) . . ? 
C7 C8 C16 113.1(2) . . ? 
N2 C8 C16 88.7(2) . . ? 
C10 C9 C8 113.3(2) . . ? 
C10 C9 H9A 108.9 . . ? 
C8 C9 H9A 108.9 . . ? 
C10 C9 H9B 108.9 . . ? 
C8 C9 H9B 108.9 . . ? 
H9A C9 H9B 107.7 . . ? 
N1 C10 C9 107.2(2) . . ? 
N1 C10 C11 101.3(2) . . ? 
C9 C10 C11 112.8(2) . . ? 
N1 C10 H10 111.7 . . ? 
C9 C10 H10 111.7 . . ? 
C11 C10 H10 111.7 . . ? 
C10 C11 C12 104.8(2) . . ? 
C10 C11 H11A 110.8 . . ? 
C12 C11 H11A 110.8 . . ? 
C10 C11 H11B 110.8 . . ? 
C12 C11 H11B 110.8 . . ? 
H11A C11 H11B 108.9 . . ? 
C6 C12 C11 104.5(2) . . ? 
C6 C12 H12A 110.9 . . ? 
C11 C12 H12A 110.9 . . ? 
C6 C12 H12B 110.9 . . ? 
C11 C12 H12B 110.9 . . ? 
H12A C12 H12B 108.9 . . ? 
O3 C13 C17 106.3(2) . . ? 
O3 C13 C18 109.5(2) . . ? 
C17 C13 C18 112.0(3) . . ? 
O3 C13 C14 101.8(2) . . ? 
C17 C13 C14 114.3(2) . . ? 
C18 C13 C14 112.1(2) . . ? 
C15 C14 C13 101.7(2) . . ? 
C15 C14 H14A 111.4 . . ? 
C13 C14 H14A 111.4 . . ? 
C15 C14 H14B 111.4 . . ? 
C13 C14 H14B 111.4 . . ? 
H14A C14 H14B 109.3 . . ? 
N2 C15 C14 105.9(2) . . ? 
N2 C15 C19 115.1(2) . . ? 
C14 C15 C19 112.6(2) . . ? 
N2 C15 C16 90.4(2) . . ? 
C14 C15 C16 118.6(2) . . ? 
C19 C15 C16 112.4(2) . . ? 
C15 C16 C8 88.6(2) . . ? 
C15 C16 H16A 113.9 . . ? 
C8 C16 H16A 113.9 . . ? 
C15 C16 H16B 113.9 . . ? 
C8 C16 H16B 113.9 . . ? 
H16A C16 H16B 111.1 . . ? 
C13 C17 H17A 109.5 . . ? 
C13 C17 H17B 109.5 . . ? 
H17A C17 H17B 109.5 . . ? 
C13 C17 H17C 109.5 . . ? 
H17A C17 H17C 109.5 . . ? 
H17B C17 H17C 109.5 . . ? 
C13 C18 H18A 109.5 . . ? 
C13 C18 H18B 109.5 . . ? 
H18A C18 H18B 109.5 . . ? 
C13 C18 H18C 109.5 . . ? 
H18A C18 H18C 109.5 . . ? 
H18B C18 H18C 109.5 . . ? 
O4 C19 O5 124.1(3) . . ? 
O4 C19 C15 122.9(3) . . ? 
O5 C19 C15 112.8(2) . . ? 
O5 C20 C21 107.1(3) . . ? 
O5 C20 H20A 110.3 . . ? 
C21 C20 H20A 110.3 . . ? 
O5 C20 H20B 110.3 . . ? 
C21 C20 H20B 110.3 . . ? 
H20A C20 H20B 108.6 . . ? 
C20 C21 H21A 109.5 . . ? 
C20 C21 H21B 109.5 . . ? 
H21A C21 H21B 109.5 . . ? 
C20 C21 H21C 109.5 . . ? 
H21A C21 H21C 109.5 . . ? 
H21B C21 H21C 109.5 . . ? 
O6 C22 C24 109.8(3) . . ? 
O6 C22 C23 101.9(2) . . ? 
C24 C22 C23 111.0(3) . . ? 
O6 C22 C25 110.7(3) . . ? 
C24 C22 C25 112.4(3) . . ? 
C23 C22 C25 110.5(3) . . ? 
C22 C23 H23A 109.5 . . ? 
C22 C23 H23B 109.5 . . ? 
H23A C23 H23B 109.5 . . ? 
C22 C23 H23C 109.5 . . ? 
H23A C23 H23C 109.5 . . ? 
H23B C23 H23C 109.5 . . ? 
C22 C24 H24A 109.5 . . ? 
C22 C24 H24B 109.5 . . ? 
H24A C24 H24B 109.5 . . ? 
C22 C24 H24C 109.5 . . ? 
H24A C24 H24C 109.5 . . ? 
H24B C24 H24C 109.5 . . ? 
C22 C25 H25A 109.5 . . ? 
C22 C25 H25B 109.5 . . ? 
H25A C25 H25B 109.5 . . ? 
C22 C25 H25C 109.5 . . ? 
H25A C25 H25C 109.5 . . ? 
H25B C25 H25C 109.5 . . ? 
O7 C26 N3 124.5(3) . . ? 
O7 C26 O6 125.3(3) . . ? 
N3 C26 O6 110.2(2) . . ? 
N3 C27 C33 100.3(2) . . ? 
N3 C27 C28 108.6(2) . . ? 
C33 C27 C28 113.9(2) . . ? 
N3 C27 H27 111.2 . . ? 
C33 C27 H27 111.2 . . ? 
C28 C27 H27 111.2 . . ? 
C29 C28 C27 114.0(2) . . ? 
C29 C28 H28A 108.7 . . ? 
C27 C28 H28A 108.7 . . ? 
C29 C28 H28B 108.7 . . ? 
C27 C28 H28B 108.7 . . ? 
H28A C28 H28B 107.6 . . ? 
C30 C29 C28 112.3(2) . . ? 
C30 C29 C37 114.0(2) . . ? 
C28 C29 C37 113.4(2) . . ? 
C30 C29 N4 109.2(2) . . ? 
C28 C29 N4 117.2(2) . . ? 
C37 C29 N4 88.8(2) . . ? 
C29 C30 C31 113.3(2) . . ? 
C29 C30 H30A 108.9 . . ? 
C31 C30 H30A 108.9 . . ? 
C29 C30 H30B 108.9 . . ? 
C31 C30 H30B 108.9 . . ? 
H30A C30 H30B 107.7 . . ? 
N3 C31 C30 107.1(2) . . ? 
N3 C31 C32 101.3(2) . . ? 
C30 C31 C32 112.1(2) . . ? 
N3 C31 H31 111.9 . . ? 
C30 C31 H31 111.9 . . ? 
C32 C31 H31 111.9 . . ? 
C31 C32 C33 105.1(2) . . ? 
C31 C32 H32A 110.7 . . ? 
C33 C32 H32A 110.7 . . ? 
C31 C32 H32B 110.7 . . ? 
C33 C32 H32B 110.7 . . ? 
H32A C32 H32B 108.8 . . ? 
C27 C33 C32 104.5(2) . . ? 
C27 C33 H33A 110.9 . . ? 
C32 C33 H33A 110.9 . . ? 
C27 C33 H33B 110.9 . . ? 
C32 C33 H33B 110.9 . . ? 
H33A C33 H33B 108.9 . . ? 
O8 C34 C39 106.0(2) . . ? 
O8 C34 C38 109.7(2) . . ? 
C39 C34 C38 111.2(3) . . ? 
O8 C34 C35 101.7(2) . . ? 
C39 C34 C35 114.5(2) . . ? 
C38 C34 C35 112.9(2) . . ? 
C36 C35 C34 101.6(2) . . ? 
C36 C35 H35A 111.4 . . ? 
C34 C35 H35A 111.4 . . ? 
C36 C35 H35B 111.4 . . ? 
C34 C35 H35B 111.4 . . ? 
H35A C35 H35B 109.3 . . ? 
N4 C36 C35 105.7(2) . . ? 
N4 C36 C40 114.8(2) . . ? 
C35 C36 C40 112.5(2) . . ? 
N4 C36 C37 90.3(2) . . ? 
C35 C36 C37 118.7(2) . . ? 
C40 C36 C37 112.7(2) . . ? 
C36 C37 C29 89.1(2) . . ? 
C36 C37 H37A 113.8 . . ? 
C29 C37 H37A 113.8 . . ? 
C36 C37 H37B 113.8 . . ? 
C29 C37 H37B 113.8 . . ? 
H37A C37 H37B 111.0 . . ? 
C34 C38 H38A 109.5 . . ? 
C34 C38 H38B 109.5 . . ? 
H38A C38 H38B 109.5 . . ? 
C34 C38 H38C 109.5 . . ? 
H38A C38 H38C 109.5 . . ? 
H38B C38 H38C 109.5 . . ? 
C34 C39 H39A 109.5 . . ? 
C34 C39 H39B 109.5 . . ? 
H39A C39 H39B 109.5 . . ? 
C34 C39 H39C 109.5 . . ? 
H39A C39 H39C 109.5 . . ? 
H39B C39 H39C 109.5 . . ? 
O9 C40 O10 124.3(3) . . ? 
O9 C40 C36 124.0(3) . . ? 
O10 C40 C36 111.5(3) . . ? 
O10 C41 C42 110.5(3) . . ? 
O10 C41 H41A 109.5 . . ? 
C42 C41 H41A 109.5 . . ? 
O10 C41 H41B 109.5 . . ? 
C42 C41 H41B 109.5 . . ? 
H41A C41 H41B 108.1 . . ? 
C41 C42 H42A 109.5 . . ? 
C41 C42 H42B 109.5 . . ? 
H42A C42 H42B 109.5 . . ? 
C41 C42 H42C 109.5 . . ? 
H42A C42 H42C 109.5 . . ? 
H42B C42 H42C 109.5 . . ? 
C44 C43 H43A 109.5 . . ? 
C44 C43 H43B 109.5 . . ? 
H43A C43 H43B 109.5 . . ? 
C44 C43 H43C 109.5 . . ? 
H43A C43 H43C 109.5 . . ? 
H43B C43 H43C 109.5 . . ? 
C45 C44 C43 115.1(4) . . ? 
C45 C44 C48 103.4(5) . . ? 
C43 C44 C48 114.0(5) . . ? 
C45 C44 H44 108.0 . . ? 
C43 C44 H44 108.0 . . ? 
C48 C44 H44 108.0 . . ? 
C44 C45 C46 104.6(4) . . ? 
C44 C45 H45A 110.8 . . ? 
C46 C45 H45A 110.8 . . ? 
C44 C45 H45B 110.8 . . ? 
C46 C45 H45B 110.8 . . ? 
H45A C45 H45B 108.9 . . ? 
C47 C46 C45 108.8(6) . . ? 
C47 C46 H46A 109.9 . . ? 
C45 C46 H46A 109.9 . . ? 
C47 C46 H46B 109.9 . . ? 
C45 C46 H46B 109.9 . . ? 
H46A C46 H46B 108.3 . . ? 
C46 C47 C48 105.1(5) . . ? 
C46 C47 H47A 110.7 . . ? 
C48 C47 H47A 110.7 . . ? 
C46 C47 H47B 110.7 . . ? 
C48 C47 H47B 110.7 . . ? 
H47A C47 H47B 108.8 . . ? 
C44 C48 C47 105.6(5) . . ? 
C44 C48 H48A 110.6 . . ? 
C47 C48 H48A 110.6 . . ? 
C44 C48 H48B 110.6 . . ? 
C47 C48 H48B 110.6 . . ? 
H48A C48 H48B 108.8 . . ? 
  
loop_ 
 _geom_torsion_atom_site_label_1 
 _geom_torsion_atom_site_label_2 
 _geom_torsion_atom_site_label_3 
 _geom_torsion_atom_site_label_4 
 _geom_torsion 
 _geom_torsion_site_symmetry_1 
 _geom_torsion_site_symmetry_2 
 _geom_torsion_site_symmetry_3 
 _geom_torsion_site_symmetry_4 
 _geom_torsion_publ_flag 
C13 O3 N2 C15 22.9(2) . . . . ? 
C13 O3 N2 C8 120.0(2) . . . . ? 
C34 O8 N4 C36 -23.2(2) . . . . ? 
C34 O8 N4 C29 -120.3(2) . . . . ? 
C5 O1 C1 C3 168.8(3) . . . . ? 
C5 O1 C1 C4 -73.5(3) . . . . ? 
C5 O1 C1 C2 51.0(4) . . . . ? 
C1 O1 C5 O2 17.3(4) . . . . ? 
C1 O1 C5 N1 -161.3(2) . . . . ? 
C6 N1 C5 O2 10.2(4) . . . . ? 
C10 N1 C5 O2 165.8(3) . . . . ? 
C6 N1 C5 O1 -171.2(2) . . . . ? 
C10 N1 C5 O1 -15.6(4) . . . . ? 
C5 N1 C6 C7 88.7(3) . . . . ? 
C10 N1 C6 C7 -71.3(3) . . . . ? 
C5 N1 C6 C12 -151.5(3) . . . . ? 
C10 N1 C6 C12 48.4(3) . . . . ? 
N1 C6 C7 C8 53.2(3) . . . . ? 
C12 C6 C7 C8 -57.8(3) . . . . ? 
C6 C7 C8 C9 -36.5(3) . . . . ? 
C6 C7 C8 N2 92.0(3) . . . . ? 
C6 C7 C8 C16 -166.7(2) . . . . ? 
O3 N2 C8 C9 128.0(2) . . . . ? 
C15 N2 C8 C9 -125.0(2) . . . . ? 
O3 N2 C8 C7 -1.9(3) . . . . ? 
C15 N2 C8 C7 105.2(3) . . . . ? 
O3 N2 C8 C16 -117.4(2) . . . . ? 
C15 N2 C8 C16 -10.3(2) . . . . ? 
C7 C8 C9 C10 38.7(3) . . . . ? 
N2 C8 C9 C10 -94.0(3) . . . . ? 
C16 C8 C9 C10 168.6(2) . . . . ? 
C5 N1 C10 C9 -85.7(3) . . . . ? 
C6 N1 C10 C9 73.3(3) . . . . ? 
C5 N1 C10 C11 155.9(3) . . . . ? 
C6 N1 C10 C11 -45.1(3) . . . . ? 
C8 C9 C10 N1 -57.0(3) . . . . ? 
C8 C9 C10 C11 53.6(3) . . . . ? 
N1 C10 C11 C12 22.7(3) . . . . ? 
C9 C10 C11 C12 -91.6(3) . . . . ? 
N1 C6 C12 C11 -31.5(3) . . . . ? 
C7 C6 C12 C11 84.4(3) . . . . ? 
C10 C11 C12 C6 5.2(3) . . . . ? 
N2 O3 C13 C17 -160.0(2) . . . . ? 
N2 O3 C13 C18 78.7(3) . . . . ? 
N2 O3 C13 C14 -40.1(2) . . . . ? 
O3 C13 C14 C15 41.0(3) . . . . ? 
C17 C13 C14 C15 155.1(2) . . . . ? 
C18 C13 C14 C15 -76.0(3) . . . . ? 
O3 N2 C15 C14 4.1(3) . . . . ? 
C8 N2 C15 C14 -109.6(2) . . . . ? 
O3 N2 C15 C19 -120.9(2) . . . . ? 
C8 N2 C15 C19 125.4(3) . . . . ? 
O3 N2 C15 C16 124.1(2) . . . . ? 
C8 N2 C15 C16 10.4(2) . . . . ? 
C13 C14 C15 N2 -27.5(3) . . . . ? 
C13 C14 C15 C19 99.0(3) . . . . ? 
C13 C14 C15 C16 -126.8(3) . . . . ? 
N2 C15 C16 C8 -10.3(2) . . . . ? 
C14 C15 C16 C8 98.0(3) . . . . ? 
C19 C15 C16 C8 -127.7(2) . . . . ? 
C9 C8 C16 C15 120.9(2) . . . . ? 
C7 C8 C16 C15 -109.5(3) . . . . ? 
N2 C8 C16 C15 10.1(2) . . . . ? 
C20 O5 C19 O4 0.3(4) . . . . ? 
C20 O5 C19 C15 -175.5(3) . . . . ? 
N2 C15 C19 O4 155.3(3) . . . . ? 
C14 C15 C19 O4 33.9(4) . . . . ? 
C16 C15 C19 O4 -103.1(4) . . . . ? 
N2 C15 C19 O5 -28.8(4) . . . . ? 
C14 C15 C19 O5 -150.3(3) . . . . ? 
C16 C15 C19 O5 72.7(3) . . . . ? 
C19 O5 C20 C21 -161.9(3) . . . . ? 
C26 O6 C22 C24 74.8(3) . . . . ? 
C26 O6 C22 C23 -167.4(2) . . . . ? 
C26 O6 C22 C25 -49.9(4) . . . . ? 
C27 N3 C26 O7 -11.4(4) . . . . ? 
C31 N3 C26 O7 -162.2(3) . . . . ? 
C27 N3 C26 O6 170.5(2) . . . . ? 
C31 N3 C26 O6 19.7(4) . . . . ? 
C22 O6 C26 O7 -13.3(4) . . . . ? 
C22 O6 C26 N3 164.8(2) . . . . ? 
C26 N3 C27 C33 155.1(3) . . . . ? 
C31 N3 C27 C33 -48.8(3) . . . . ? 
C26 N3 C27 C28 -85.3(3) . . . . ? 
C31 N3 C27 C28 70.9(3) . . . . ? 
N3 C27 C28 C29 -52.9(3) . . . . ? 
C33 C27 C28 C29 57.9(3) . . . . ? 
C27 C28 C29 C30 36.8(3) . . . . ? 
C27 C28 C29 C37 167.8(2) . . . . ? 
C27 C28 C29 N4 -90.8(3) . . . . ? 
O8 N4 C29 C30 -128.0(2) . . . . ? 
C36 N4 C29 C30 124.8(2) . . . . ? 
O8 N4 C29 C28 1.2(3) . . . . ? 
C36 N4 C29 C28 -106.1(3) . . . . ? 
O8 N4 C29 C37 117.0(2) . . . . ? 
C36 N4 C29 C37 9.8(2) . . . . ? 
C28 C29 C30 C31 -39.4(3) . . . . ? 
C37 C29 C30 C31 -170.1(2) . . . . ? 
N4 C29 C30 C31 92.4(3) . . . . ? 
C26 N3 C31 C30 81.4(3) . . . . ? 
C27 N3 C31 C30 -73.2(3) . . . . ? 
C26 N3 C31 C32 -161.0(3) . . . . ? 
C27 N3 C31 C32 44.4(3) . . . . ? 
C29 C30 C31 N3 57.8(3) . . . . ? 
C29 C30 C31 C32 -52.5(3) . . . . ? 
N3 C31 C32 C33 -21.5(3) . . . . ? 
C30 C31 C32 C33 92.4(3) . . . . ? 
N3 C27 C33 C32 32.6(3) . . . . ? 
C28 C27 C33 C32 -83.2(3) . . . . ? 
C31 C32 C33 C27 -6.8(3) . . . . ? 
N4 O8 C34 C39 160.4(2) . . . . ? 
N4 O8 C34 C38 -79.5(3) . . . . ? 
N4 O8 C34 C35 40.3(2) . . . . ? 
O8 C34 C35 C36 -40.9(2) . . . . ? 
C39 C34 C35 C36 -154.8(2) . . . . ? 
C38 C34 C35 C36 76.6(3) . . . . ? 
O8 N4 C36 C35 -3.8(3) . . . . ? 
C29 N4 C36 C35 110.2(2) . . . . ? 
O8 N4 C36 C40 120.8(2) . . . . ? 
C29 N4 C36 C40 -125.2(3) . . . . ? 
O8 N4 C36 C37 -123.8(2) . . . . ? 
C29 N4 C36 C37 -9.8(2) . . . . ? 
C34 C35 C36 N4 27.3(3) . . . . ? 
C34 C35 C36 C40 -98.8(3) . . . . ? 
C34 C35 C36 C37 126.5(3) . . . . ? 
N4 C36 C37 C29 9.8(2) . . . . ? 
C35 C36 C37 C29 -98.4(3) . . . . ? 
C40 C36 C37 C29 127.1(3) . . . . ? 
C30 C29 C37 C36 -120.0(2) . . . . ? 
C28 C29 C37 C36 109.7(3) . . . . ? 
N4 C29 C37 C36 -9.6(2) . . . . ? 
C41 O10 C40 O9 3.1(5) . . . . ? 
C41 O10 C40 C36 178.6(3) . . . . ? 
N4 C36 C40 O9 -155.3(3) . . . . ? 
C35 C36 C40 O9 -34.3(4) . . . . ? 
C37 C36 C40 O9 103.1(4) . . . . ? 
N4 C36 C40 O10 29.2(4) . . . . ? 
C35 C36 C40 O10 150.2(3) . . . . ? 
C37 C36 C40 O10 -72.4(3) . . . . ? 
C40 O10 C41 C42 81.2(4) . . . . ? 
C43 C44 C45 C46 160.1(6) . . . . ? 
C48 C44 C45 C46 35.1(7) . . . . ? 
C44 C45 C46 C47 -25.8(9) . . . . ? 
C45 C46 C47 C48 5.5(10) . . . . ? 
C45 C44 C48 C47 -32.1(7) . . . . ? 
C43 C44 C48 C47 -157.8(6) . . . . ? 
C46 C47 C48 C44 16.5(9) . . . . ? 
  
_refine_diff_density_max    0.259 
_refine_diff_density_min   -0.229 
_refine_diff_density_rms    0.044 
  
_shelx_res_file 
; 
TITL mrb1162_a.res in Pn 
    mrb1162.res 
    created by SHELXL-2018/3 at 14:35:16 on 07-Nov-2019 
CELL  1.54184  17.6585   6.0966  22.7527   90.000   98.452   90.000 
ZERR    2.000   0.0002   0.0001   0.0003    0.000    0.001    0.000 
LATT -1 
SYMM 1/2+X, -Y, 1/2+Z 
SFAC C  H  N  O 
UNIT 96 160 8 20 
REM Old TITL mrb1162 in P2/n 
REM SHELXT solution in Pn: R1 0.101, Rweak 0.010, Alpha 0.001 
REM <I/s>   0.502 for  459 systematic absences,  Orientation as input 
REM Flack x=  0.482 ( 0.099 ) from  3498 Parsons' quotients 
REM Formula found by SHELXT:  C50 N2 O10 
L.S. 20 
ACTA 
BOND $h 
conf 
FMAP 2 
PLAN 20 
htab 
size 0.13 0.03 0.03 
twin 
temp -188 
REM exti .001 
WGHT    0.058500    0.573900 
BASF   0.44929 
FVAR       3.88183 
O1    4    1.018938    0.609633    0.716050    11.00000    0.01710    0.02609 = 
         0.01543    0.00491    0.00032    0.00509 
O2    4    1.083136    0.538848    0.637506    11.00000    0.01867    0.02140 = 
         0.02073   -0.00052    0.00283    0.00638 
O3    4    0.813655    1.001505    0.480775    11.00000    0.01849    0.01613 = 
         0.01827    0.00229   -0.00307   -0.00272 
O4    4    0.604890    0.597645    0.466886    11.00000    0.01845    0.04402 = 
         0.03194   -0.01109    0.00033   -0.00639 
O5    4    0.641841    0.761827    0.554637    11.00000    0.01908    0.03297 = 
         0.02608   -0.00625    0.00601   -0.00479 
O6    4   -0.018495    0.501712    0.283020    11.00000    0.01856    0.02613 = 
         0.01408    0.00427   -0.00003    0.00624 
O7    4   -0.081213    0.572527    0.362167    11.00000    0.01990    0.02409 = 
         0.02121    0.00135    0.00287    0.00650 
O8    4    0.183392    0.102485    0.517225    11.00000    0.01872    0.01865 = 
         0.01662    0.00194   -0.00269   -0.00241 
O9    4    0.392206    0.504843    0.531978    11.00000    0.01641    0.03771 = 
         0.02985   -0.00325   -0.00345   -0.00644 
O10   4    0.352518    0.345264    0.443800    11.00000    0.01808    0.03891 = 
         0.02936   -0.00216    0.00532   -0.00347 
N1    3    0.987690    0.793664    0.631524    11.00000    0.01456    0.02094 = 
         0.01750    0.00084    0.00095    0.00182 
N2    3    0.783912    0.871825    0.526993    11.00000    0.01637    0.01581 = 
         0.01820    0.00143    0.00001   -0.00060 
N3    3    0.010412    0.309185    0.366261    11.00000    0.01536    0.02108 = 
         0.01677    0.00145    0.00142    0.00423 
N4    3    0.212879    0.233891    0.471987    11.00000    0.01582    0.01601 = 
         0.01870    0.00118   -0.00236   -0.00038 
C1    1    1.075041    0.502275    0.761178    11.00000    0.01809    0.02167 = 
         0.01743    0.00395   -0.00261    0.00487 
C2    1    1.153705    0.608363    0.762802    11.00000    0.01784    0.04701 = 
         0.02720    0.00657   -0.00138    0.00185 
AFIX 137 
H2A   2    1.148594    0.768217    0.764481    11.00000   -1.50000 
H2B   2    1.175121    0.567646    0.726959    11.00000   -1.50000 
H2C   2    1.187858    0.557275    0.798009    11.00000   -1.50000 
AFIX   0 
C3    1    1.042508    0.549748    0.817856    11.00000    0.02425    0.03304 = 
         0.01809    0.00155    0.00053    0.00252 
AFIX 137 
H3A   2    0.990959    0.487270    0.814964    11.00000   -1.50000 
H3B   2    1.039984    0.708733    0.823622    11.00000   -1.50000 
H3C   2    1.075533    0.483952    0.851650    11.00000   -1.50000 
AFIX   0 
C4    1    1.077049    0.256908    0.749858    11.00000    0.04437    0.02542 = 
         0.02509    0.00507    0.00540    0.01025 
AFIX 137 
H4A   2    1.095665    0.229955    0.711996    11.00000   -1.50000 
H4B   2    1.025382    0.196251    0.748189    11.00000   -1.50000 
H4C   2    1.111395    0.186239    0.782085    11.00000   -1.50000 
AFIX   0 
C5    1    1.033961    0.637004    0.659784    11.00000    0.01593    0.01898 = 
         0.01678    0.00040   -0.00064   -0.00195 
C6    1    0.982395    0.839467    0.568299    11.00000    0.01653    0.02113 = 
         0.01532    0.00156    0.00113    0.00061 
AFIX  13 
H6    2    1.032820    0.816706    0.554152    11.00000   -1.20000 
AFIX   0 
C7    1    0.920385    0.690947    0.534615    11.00000    0.01770    0.01611 = 
         0.01773    0.00059    0.00088    0.00292 
AFIX  23 
H7A   2    0.938525    0.537170    0.537912    11.00000   -1.20000 
H7B   2    0.913191    0.731318    0.492013    11.00000   -1.20000 
AFIX   0 
C8    1    0.842735    0.704749    0.557187    11.00000    0.01694    0.01508 = 
         0.01933   -0.00181    0.00057    0.00070 
C9    1    0.851275    0.732780    0.624763    11.00000    0.01551    0.01650 = 
         0.01901    0.00080    0.00197    0.00222 
AFIX  23 
H9A   2    0.802948    0.792692    0.635347    11.00000   -1.20000 
H9B   2    0.859688    0.586963    0.643748    11.00000   -1.20000 
AFIX   0 
C10   1    0.917363    0.884660    0.649682    11.00000    0.01425    0.01840 = 
         0.01766   -0.00137    0.00106    0.00225 
AFIX  13 
H10   2    0.921861    0.899279    0.693834    11.00000   -1.20000 
AFIX   0 
C11   1    0.913087    1.110362    0.618816    11.00000    0.01944    0.01561 = 
         0.02310   -0.00161   -0.00031    0.00054 
AFIX  23 
H11A  2    0.935194    1.225976    0.646745    11.00000   -1.20000 
H11B  2    0.859389    1.149232    0.603447    11.00000   -1.20000 
AFIX   0 
C12   1    0.960664    1.083719    0.567139    11.00000    0.01738    0.01871 = 
         0.02178    0.00118   -0.00002   -0.00134 
AFIX  23 
H12A  2    0.929877    1.123533    0.528687    11.00000   -1.20000 
H12B  2    1.007001    1.177140    0.573558    11.00000   -1.20000 
AFIX   0 
C13   1    0.763837    0.959974    0.425245    11.00000    0.01625    0.01922 = 
         0.01777   -0.00156   -0.00251    0.00150 
C14   1    0.748698    0.712638    0.429566    11.00000    0.01785    0.01677 = 
         0.02319   -0.00263   -0.00021    0.00058 
AFIX  23 
H14A  2    0.702035    0.668227    0.402601    11.00000   -1.20000 
H14B  2    0.792737    0.625198    0.420400    11.00000   -1.20000 
AFIX   0 
C15   1    0.738122    0.688908    0.494385    11.00000    0.01580    0.01733 = 
         0.02052   -0.00291   -0.00167   -0.00079 
C16   1    0.786984    0.517289    0.533056    11.00000    0.02014    0.01451 = 
         0.02409   -0.00047   -0.00135   -0.00036 
AFIX  23 
H16A  2    0.810287    0.405088    0.509843    11.00000   -1.20000 
H16B  2    0.760356    0.448351    0.563696    11.00000   -1.20000 
AFIX   0 
C17   1    0.808694    1.022784    0.376366    11.00000    0.01967    0.02340 = 
         0.02242    0.00120   -0.00071    0.00012 
AFIX 137 
H17A  2    0.854648    0.931140    0.378846    11.00000   -1.50000 
H17B  2    0.823687    1.177369    0.380721    11.00000   -1.50000 
H17C  2    0.776924    1.000698    0.337737    11.00000   -1.50000 
AFIX   0 
C18   1    0.690707    1.094977    0.423207    11.00000    0.01861    0.01996 = 
         0.02356   -0.00027   -0.00183    0.00370 
AFIX 137 
H18A  2    0.702752    1.250975    0.419840    11.00000   -1.50000 
H18B  2    0.668523    1.070334    0.459684    11.00000   -1.50000 
H18C  2    0.653892    1.050304    0.388789    11.00000   -1.50000 
AFIX   0 
C19   1    0.654079    0.681143    0.502715    11.00000    0.01983    0.01725 = 
         0.02208   -0.00087    0.00095   -0.00081 
C20   1    0.563535    0.744548    0.567817    11.00000    0.02259    0.03451 = 
         0.03784   -0.00171    0.01141   -0.00448 
AFIX  23 
H20A  2    0.553276    0.593599    0.580621    11.00000   -1.20000 
H20B  2    0.526470    0.780192    0.532087    11.00000   -1.20000 
AFIX   0 
C21   1    0.556164    0.904127    0.616548    11.00000    0.04218    0.04146 = 
         0.04833   -0.00820    0.02119   -0.00320 
AFIX 137 
H21A  2    0.569397    1.051508    0.604184    11.00000   -1.50000 
H21B  2    0.590924    0.861829    0.652366    11.00000   -1.50000 
H21C  2    0.503338    0.903648    0.625035    11.00000   -1.50000 
AFIX   0 
C22   1   -0.071011    0.629222    0.239580    11.00000    0.01735    0.02435 = 
         0.01708    0.00167   -0.00376    0.00346 
C23   1   -0.042069    0.574277    0.181606    11.00000    0.02981    0.03354 = 
         0.01938    0.00238    0.00146    0.00519 
AFIX 137 
H23A  2   -0.048551    0.416971    0.173533    11.00000   -1.50000 
H23B  2    0.012280    0.612594    0.184810    11.00000   -1.50000 
H23C  2   -0.071282    0.657849    0.149105    11.00000   -1.50000 
AFIX   0 
C24   1   -0.062169    0.872133    0.253524    11.00000    0.03519    0.02291 = 
         0.02334    0.00481   -0.00168    0.00288 
AFIX 137 
H24A  2   -0.009210    0.916896    0.251918    11.00000   -1.50000 
H24B  2   -0.074752    0.900177    0.293385    11.00000   -1.50000 
H24C  2   -0.096835    0.956168    0.224273    11.00000   -1.50000 
AFIX   0 
C25   1   -0.153034    0.550703    0.237975    11.00000    0.02134    0.03840 = 
         0.02364    0.00297   -0.00374   -0.00109 
AFIX 137 
H25A  2   -0.172008    0.596314    0.274459    11.00000   -1.50000 
H25B  2   -0.154652    0.390386    0.234906    11.00000   -1.50000 
H25C  2   -0.185298    0.614812    0.203527    11.00000   -1.50000 
AFIX   0 
C26   1   -0.033578    0.471925    0.339424    11.00000    0.01478    0.01815 = 
         0.01615    0.00160   -0.00187    0.00100 
C27   1    0.015183    0.262831    0.429995    11.00000    0.01574    0.01945 = 
         0.01570    0.00263    0.00042    0.00119 
AFIX  13 
H27   2   -0.035589    0.283315    0.443758    11.00000   -1.20000 
AFIX   0 
C28   1    0.076194    0.413239    0.464154    11.00000    0.01795    0.01725 = 
         0.01640    0.00169    0.00448    0.00134 
AFIX  23 
H28A  2    0.057298    0.566281    0.460917    11.00000   -1.20000 
H28B  2    0.083181    0.372209    0.506707    11.00000   -1.20000 
AFIX   0 
C29   1    0.154135    0.403412    0.442095    11.00000    0.01654    0.01234 = 
         0.01925    0.00278    0.00037    0.00203 
C30   1    0.146358    0.377910    0.374516    11.00000    0.01594    0.01765 = 
         0.01758    0.00266    0.00267    0.00207 
AFIX  23 
H30A  2    0.195315    0.322205    0.364039    11.00000   -1.20000 
H30B  2    0.136826    0.523919    0.355849    11.00000   -1.20000 
AFIX   0 
C31   1    0.081776    0.222293    0.348947    11.00000    0.01502    0.02154 = 
         0.01784    0.00089    0.00115    0.00295 
AFIX  13 
H31   2    0.078270    0.206552    0.304882    11.00000   -1.20000 
AFIX   0 
C32   1    0.087693   -0.002514    0.380685    11.00000    0.01878    0.01665 = 
         0.02004   -0.00292   -0.00145    0.00104 
AFIX  23 
H32A  2    0.141507   -0.035742    0.397182    11.00000   -1.20000 
H32B  2    0.067902   -0.120887    0.352808    11.00000   -1.20000 
AFIX   0 
C33   1    0.038042    0.019926    0.431070    11.00000    0.01593    0.01799 = 
         0.02021    0.00166   -0.00041   -0.00223 
AFIX  23 
H33A  2   -0.007796   -0.075172    0.423455    11.00000   -1.20000 
H33B  2    0.067744   -0.020150    0.469927    11.00000   -1.20000 
AFIX   0 
C34   1    0.233374    0.140486    0.572891    11.00000    0.01617    0.01869 = 
         0.01699   -0.00194   -0.00412   -0.00055 
C35   1    0.248366    0.387858    0.569788    11.00000    0.01939    0.01628 = 
         0.01928   -0.00095   -0.00111   -0.00069 
AFIX  23 
H35A  2    0.204362    0.474168    0.579506    11.00000   -1.20000 
H35B  2    0.295120    0.430911    0.596846    11.00000   -1.20000 
AFIX   0 
C36   1    0.258587    0.415880    0.505168    11.00000    0.01583    0.01486 = 
         0.02245   -0.00043   -0.00152   -0.00142 
C37   1    0.209315    0.588231    0.467332    11.00000    0.01717    0.01837 = 
         0.02156    0.00142   -0.00104   -0.00053 
AFIX  23 
H37A  2    0.235885    0.660351    0.437141    11.00000   -1.20000 
H37B  2    0.185741    0.698045    0.491099    11.00000   -1.20000 
AFIX   0 
C38   1    0.305905    0.003528    0.574696    11.00000    0.01869    0.01877 = 
         0.02364   -0.00063   -0.00178    0.00052 
AFIX 137 
H38A  2    0.330283    0.036525    0.539704    11.00000   -1.50000 
H38B  2    0.292727   -0.152611    0.574759    11.00000   -1.50000 
H38C  2    0.341333    0.038624    0.610785    11.00000   -1.50000 
AFIX   0 
C39   1    0.188035    0.072364    0.621754    11.00000    0.02246    0.02280 = 
         0.02421    0.00036    0.00163   -0.00206 
AFIX 137 
H39A  2    0.172930   -0.081838    0.616357    11.00000   -1.50000 
H39B  2    0.142146    0.164001    0.619876    11.00000   -1.50000 
H39C  2    0.219802    0.091015    0.660527    11.00000   -1.50000 
AFIX   0 
C40   1    0.342233    0.424008    0.496741    11.00000    0.02236    0.01942 = 
         0.02187    0.00312    0.00115    0.00013 
C41   1    0.430768    0.350046    0.430259    11.00000    0.02177    0.05587 = 
         0.03661   -0.00025    0.01268   -0.00101 
AFIX  23 
H41A  2    0.455860    0.488528    0.445177    11.00000   -1.20000 
H41B  2    0.429870    0.344956    0.386672    11.00000   -1.20000 
AFIX   0 
C42   1    0.475197    0.160542    0.458247    11.00000    0.03140    0.06271 = 
         0.06967    0.00505    0.01877    0.01217 
AFIX 137 
H42A  2    0.450097    0.023583    0.443673    11.00000   -1.50000 
H42B  2    0.477600    0.168634    0.501499    11.00000   -1.50000 
H42C  2    0.527190    0.164454    0.448023    11.00000   -1.50000 
AFIX   0 
C43   1    0.196467    0.599540    0.202845    11.00000    0.05497    0.07601 = 
         0.09581   -0.01194    0.01468    0.01501 
AFIX 137 
H43A  2    0.166767    0.671245    0.168374    11.00000   -1.50000 
H43B  2    0.162496    0.561561    0.231703    11.00000   -1.50000 
H43C  2    0.220115    0.465845    0.189977    11.00000   -1.50000 
AFIX   0 
C44   1    0.258421    0.754282    0.231451    11.00000    0.05024    0.08505 = 
         0.06793    0.00102    0.01816    0.00851 
AFIX  13 
H44   2    0.282718    0.824050    0.199090    11.00000   -1.20000 
AFIX   0 
C45   1    0.231455    0.932853    0.268209    11.00000    0.05714    0.07825 = 
         0.08152   -0.01089    0.00615    0.02078 
AFIX  23 
H45A  2    0.192859    0.876856    0.291917    11.00000   -1.20000 
H45B  2    0.208652    1.054689    0.242782    11.00000   -1.20000 
AFIX   0 
C46   1    0.303034    1.008269    0.308358    11.00000    0.07384    0.08437 = 
         0.13701   -0.03710   -0.00412    0.02497 
AFIX  23 
H46A  2    0.325722    1.135746    0.290375    11.00000   -1.20000 
H46B  2    0.289926    1.053541    0.347420    11.00000   -1.20000 
AFIX   0 
C47   1    0.358109    0.826626    0.316109    11.00000    0.07035    0.11482 = 
         0.09299   -0.02973   -0.00789    0.04032 
AFIX  23 
H47A  2    0.366446    0.775847    0.357890    11.00000   -1.20000 
H47B  2    0.407860    0.872423    0.304932    11.00000   -1.20000 
AFIX   0 
C48   1    0.321212    0.642452    0.274149    11.00000    0.06376    0.07782 = 
         0.10559   -0.01235   -0.01020    0.02800 
AFIX  23 
H48A  2    0.359714    0.575314    0.252159    11.00000   -1.20000 
H48B  2    0.299363    0.526574    0.297108    11.00000   -1.20000 
AFIX   0 
HKLF 4 
  
  
  
  
REM  mrb1162_a.res in Pn 
REM wR2 = 0.1115, GooF = S = 1.043, Restrained GooF = 1.043 for all data 
REM R1 = 0.0414 for 8004 Fo > 4sig(Fo) and 0.0435 for all 8411 data 
REM 573 parameters refined using 2 restraints 
  
END 
  
WGHT      0.0570      0.5863 
  
REM Instructions for potential hydrogen bonds 
HTAB C2 O2 
EQIV $1 x+1/2, -y+1, z+1/2 
HTAB C3 O4_$1 
HTAB C4 O2 
HTAB C11 N2 
HTAB C12 O3 
EQIV $2 x, y-1, z 
HTAB C16 O3_$2 
EQIV $3 x+1, y, z 
HTAB C17 O7_$3 
HTAB C24 O7 
HTAB C25 O7 
HTAB C32 N4 
HTAB C33 O8 
EQIV $4 x, y+1, z 
HTAB C37 O8_$4 
EQIV $5 x-1, y, z 
HTAB C39 O2_$5 
  
REM Highest difference peak  0.259,  deepest hole -0.229,  1-sigma level  0.044 
Q1    1   0.9169  0.9895  0.6307  11.00000  0.05    0.26 
Q2    1   0.9758  0.9602  0.5660  11.00000  0.05    0.24 
Q3    1   0.2454  0.5528  0.2319  11.00000  0.05    0.23 
Q4    1   1.0163  0.4074  0.7140  11.00000  0.05    0.22 
Q5    1   0.2753  1.0311  0.2664  11.00000  0.05    0.20 
Q6    1   0.4408  0.0665  0.3977  11.00000  0.05    0.20 
Q7    1   0.2998  0.4216  0.5015  11.00000  0.05    0.19 
Q8    1   0.9376  1.0765  0.5908  11.00000  0.05    0.18 
Q9    1   0.1943 -0.0734  0.5111  11.00000  0.05    0.18 
Q10   1   0.0610  0.0164  0.4096  11.00000  0.05    0.18 
Q11   1   0.0881  0.1168  0.3652  11.00000  0.05    0.18 
Q12   1   0.2208  0.7331  0.1814  11.00000  0.05    0.17 
Q13   1   0.3658  0.9903  0.2994  11.00000  0.05    0.17 
Q14   1   0.8818  0.7030  0.5515  11.00000  0.05    0.17 
Q15   1   0.7758  0.9994  0.5461  11.00000  0.05    0.17 
Q16   1   0.7504  0.6791  0.4679  11.00000  0.05    0.16 
Q17   1   0.2414  0.6450  0.2606  11.00000  0.05    0.16 
Q18   1   0.8545  0.7222  0.5903  11.00000  0.05    0.16 
Q19   1   0.3058  0.7273  0.3123  11.00000  0.05    0.16 
Q20   1   0.2848  1.1951  0.3158  11.00000  0.05    0.16 
; 
_shelx_res_checksum   10382 
  
_shelx_hkl_file 
; 
   0   0   2 156655. 3360.66   1 
   0   0  -2 176807. 3390.27   1 
   0   0  -3 2.03259 24.7406   1 
   0   0   3 5.29081 21.3901   1 
   0   0   4 66167.7 1716.54   1 
   0   0  -4 69290.1 1752.00   1 
   0   0  -5-16.2103 19.4017   1 
   0   0   5 25.9397 26.7500   1 
   0   0  -5 56.3646 47.4179   4 
   0   0  -6 37181.7 1301.14   1 
   0   0   6 38576.6 1281.12   1 
   0   0  -7-1.49669 34.5756   1 
   0   0  -7-26.9830 59.3908   4 
   0   0   7 74.1495 61.2240   1 
   0   0   8 11838.9 705.955   1 
   0   0  -8 12048.1 745.633   1 
   0   0  -9-15.4335 59.7027   1 
   0   0   9-43.0283 34.2798   1 
   0   0  10 107701. 3072.73   1 
   0   0  11-3.32065 42.5844   1 
   0   0  12 11129.4 601.992  12 
   0   0  12 10006.9 1399.91   2 
   0   0  12 10392.6 1410.28   3 
   0   0  12 11599.7 615.285  18 
   0   0  12 10970.2 597.133  10 
   0   0  13 1.96434 19.0551  18 
   0   0  13 15.4382 35.1994  27 
   0   0  13-87.5290 190.772   2 
   0   0  13-9.67307 47.7892  12 
   0   0 -13 36.4124 80.4993   1 
   0   0  13 35.0565 70.0829   3 
   0   0  13-7.22144 52.2575  10 
   0   0  14 22043.0 1059.79  27 
   0   0  14 25078.1 1043.27  18 
   0   0  14 24596.9 2479.50   3 
   0   0  14 25051.3 2484.04   2 
   0   0  14 24229.3 1023.14  10 
   0   0 -14 21474.9 1459.30   1 
   0   0  15 14.1069 33.5096  18 
   0   0  15-50.6739 202.323   3 
   0   0  15-165.447 276.229   2 
   0   0  15 16.0562 56.2025  10 
   0   0  16 29193.1 3003.76   2 
   0   0  16 28856.8 1263.46  10 
   0   0  16 33524.6 1314.20  18 
   0   0  16 32662.7 3180.07   3 
   0   0  17 52.4231 83.8063  18 
   0   0  17-84.6620 77.9472  10 
   0   0  18 4349.11 460.800  18 
   0   0  18 4084.15 461.741  10 
   0   0  19-33.0431 24.6510  18 
   0   0  19 4.34168 34.6247  10 
   0   0  20 25726.9 1237.84  18 
   0   0  20 26128.6 1308.76  10 
   0   0  21 65.4537 58.1021  18 
   0   0  21-96.6047 70.4613  20 
   0   0  21-27.2654 86.9490  10 
   0   0  22 6605.24 645.604  20 
   0   0  22 5927.35 581.854  10 
   0   0  22 7113.46 606.986  18 
   0   0  23-15.0732 51.3493  20 
   0   0  23-16.9068 43.4411  10 
   0   0  24-24.1535 89.3735  20 
   0   0  24 36.4819 35.7267  26 
   0   0  24 32.8508 58.6227  10 
   0   0  25-49.2633 60.6778  26 
   0   0  25-5.04993 46.8083  10 
   0   0  25-4.56237 24.5454  20 
   0   0  26 1523.80 234.057  20 
   0   0  26 658.910 173.041  26 
   0   0  27-88.3483 44.1735  20 
   0   1   0 80906.6 1938.94   1 
   0  -1   0 79661.5 1910.43   1 
   0   1   1 4154.96 251.966   1 
   0  -1   1 3947.50 298.134   1 
   0   1  -1 3908.95 307.350   1 
   0  -1  -1 3694.41 227.119   1 
   0   1  -1 4363.83 277.763   4 
   0   1  -2 34806.6 1106.12   4 
   0  -1  -2 33101.9 1586.68   2 
   0   1  -2 33790.1 1157.56   1 
   0  -1   2 36945.2 1168.98   1 
   0  -1  -2 34626.0 1614.71   3 
   0  -1  -2 31904.8 809.224   1 
   0   1   2 34283.1 1407.43   5 
   0  -1  -3 281107. 4993.17   4 
   0   1  -3 234231. 5398.71   4 
   0   1  -3 220551. 5407.62   1 
   0   1   3 210031. 6081.53   3 
   0   1   3 207041. 6074.81   2 
   0   1   3 227501. 5721.38   5 
   0  -1  -3 211981. 5748.81   5 
   0  -1  -3 241830. 6171.53   2 
   0  -1  -3 241113. 6181.40   3 
   0   1   4 146653. 3815.34   5 
   0  -1  -4 142314. 3043.62   4 
   0   1   4 123874. 4072.51   3 
   0  -1  -4 140657. 4123.81   3 
   0  -1  -4 119558. 3674.14   5 
   0   1   4 125219. 4078.61   2 
   0   1  -4 126862. 3406.38   1 
   0   1  -4 144537. 3519.57   4 
   0  -1  -4 136223. 4055.64   2 
   0  -1   4 140374. 3432.84   1 
   0  -1  -5 2357.66 398.518   5 
   0   1   5 1847.40 412.281   3 
   0   1  -5 2211.06 318.502   1 
   0   1  -5 2208.08 333.318   4 
   0  -1   5 2300.03 309.285   1 
   0  -1  -5 2592.00 472.995   3 
   0  -1  -5 2251.55 252.432   4 
   0  -1  -5 2420.88 453.461   2 
   0   1   5 1779.79 389.406   2 
   0  -1  -6 39672.7 1841.95   5 
   0  -1  -6 35695.5 802.516   1 
   0  -1  -6 38800.9 1326.92   4 
   0  -1   6 39676.8 1504.00   1 
   0   1   6 38240.1 2072.46   2 
   0   1   6 38859.7 2103.65   3 
   0  -1  -7 46116.0 1594.49   4 
   0  -1   7 43094.1 1678.66   1 
   0  -1  -7 38010.1 1933.32   5 
   0   1   7 34660.7 2144.92   3 
   0  -1  -7 33577.9 953.206   1 
   0   1   7 36804.8 2192.28   2 
   0  -1  -7 38176.8 975.118   1 
   0   1   8 1949.75 509.000   2 
   0  -1   8 2485.07 378.264   1 
   0   1   8 2386.03 570.071   3 
   0  -1  -8 1747.23 310.233   4 
   0  -1  -8 2306.32 200.497   1 
   0  -1  -8 2332.32 204.030   1 
   0  -1  -8 2016.25 436.294   5 
   0  -1  -9 8987.93 463.192   1 
   0   1   9 8619.53 1158.24   3 
   0   1   9 8079.33 1131.37   2 
   0  -1  -9 8644.77 463.527   1 
   0  -1   9 9020.72 787.639   1 
   0  -1 -10 18502.6 760.186   1 
   0  -1  10 19226.1 1240.34   1 
   0   1  10 18765.0 1790.30   2 
   0   1  10 18469.4 1793.07   3 
   0  -1  11 3568.26 299.432  18 
   0  -1  11 3112.88 508.363   1 
   0  -1 -11 2748.93 276.218   1 
   0   1  11 3249.62 809.703   2 
   0  -1  11 3137.00 294.503  10 
   0   1  11 2704.77 705.938   3 
   0   1  11 3375.31 303.797  18 
   0  -1  12 6873.00 467.115  10 
   0   1  12 5456.21 1070.01   2 
   0   1  12 7040.22 477.465  18 
   0  -1  12 6768.88 454.105  18 
   0   1  12 5811.42 1147.72   3 
   0  -1  12 6582.00 443.572  12 
   0  -1  12 5846.10 732.823   1 
   0   1 -12 7217.01 529.617   9 
   0   1  12 5398.79 448.486  10 
   0   1  13 47673.9 1480.63  18 
   0   1  13 39159.2 3176.90   2 
   0  -1  13 41847.8 1389.86  12 
   0   1  13 37579.3 3125.20   3 
   0   1 -13 44044.0 1556.18   9 
   0  -1  13 40494.5 2122.35   1 
   0   1  13 36584.9 1396.01  10 
   0  -1  13 42550.4 1397.56  18 
   0  -1  13 42349.0 1427.58  10 
   0  -1  14 1632.86 234.649  10 
   0  -1  14 1659.52 231.038  12 
   0   1  14 1309.42 226.277  27 
   0   1  14 1515.40 236.083  18 
   0   1  14 1104.72 225.962  10 
   0   1  14 1520.53 652.945   2 
   0  -1  14 1347.74 217.474  18 
   0  -1  14 1484.18 377.084   1 
   0   1  14 1218.91 591.934   3 
   0   1 -14 1624.72 263.539   9 
   0  -1  15 246.378 101.457  10 
   0   1 -15 167.743 78.0764   9 
   0  -1  15 320.469 114.328  18 
   0   1  15 442.764 363.498   3 
   0   1  15 43.2837 195.681   2 
   0   1  15 270.716 85.9748  18 
   0   1  15 168.881 100.967  10 
   0   1  15 229.788 100.342  27 
   0  -1  16 5482.60 499.000  10 
   0   1 -16 5173.73 884.144   1 
   0   1  16 5349.62 482.488  18 
   0   1  16 4973.11 497.975  10 
   0   1  16 4407.90 1253.46   2 
   0   1 -16 5390.44 523.394   9 
   0   1  16 3202.60 943.673   3 
   0  -1  16 5663.90 487.187  18 
   0   1 -17 2470.62 360.104   9 
   0   1  17 2210.91 344.487  10 
   0  -1  17 2926.19 373.059  10 
   0  -1  17 2908.64 353.113  18 
   0   1  17 2367.64 372.482  20 
   0   1  17 3372.06 390.439  18 
   0   1 -18 507.405 169.905   9 
   0   1  18 494.848 173.161  10 
   0  -1  18 435.813 146.210  10 
   0   1  18 443.017 141.218  26 
   0   1  18 297.926 121.540  20 
   0   1  18 525.600 154.219  18 
   0  -1  18 608.553 161.798  18 
   0  -1  19 2412.33 338.237  18 
   0   1 -19 2200.09 341.685   9 
   0   1  19 1733.97 318.542  20 
   0   1  19 2136.54 332.515  18 
   0   1  19 1916.71 394.390  26 
   0   1  19 1837.53 324.488  10 
   0  -1  19 2387.24 350.586  10 
   0  -1  20 5684.66 536.487  18 
   0   1  20 5123.74 535.621  10 
   0   1  20 5705.84 539.929  18 
   0   1  20 4985.21 629.173  26 
   0   1  20 4407.16 532.586  20 
   0  -1  20 5669.86 566.422  10 
   0  -1  21 24.6617 46.0511  10 
   0  -1  21 197.164 116.400  20 
   0   1  21 114.923 78.8535  20 
   0   1  21 148.766 39.0289  18 
   0   1  21 183.689 111.833  10 
   0  -1  22 16705.0 984.578  10 
   0  -1  22 15343.4 979.759  20 
   0   1  22 14080.8 1062.89  26 
   0   1  22 14003.3 964.581  20 
   0   1  22 14688.6 910.316  18 
   0   1  22 13779.6 915.299  10 
   0  -1  23 1809.25 321.803  20 
   0  -1  23 1864.27 306.524  10 
   0   1  23 1742.25 321.838  26 
   0   1  23 1901.08 332.574  20 
   0  -1  24 462.742 148.155  10 
   0  -1  24 565.093 151.519  20 
   0   1  24 398.967 154.284  26 
   0   1  24 618.936 169.354  20 
   0  -1  25 116.811 65.4554  20 
   0   1  25 74.6049 61.5710  26 
   0   1  25 165.452 82.7002  20 
   0  -1  25 178.651 109.128  10 
   0  -1  25 143.014 93.3533  26 
   0   1  26 376.623 106.703  20 
   0  -1  26 224.437 117.691  26 
   0  -1  26 424.819 116.198  20 
   0  -1  26 407.806 120.869  10 
   0   1  27 208.421 74.0862  20 
   0   2   0 70656.7 2160.67   1 
   0  -2   0 72763.0 2104.29   1 
   0   2   1 10801.2 636.147   1 
   0  -2  -1 10723.1 605.437   1 
   0   2  -1 9913.29 695.860   1 
   0  -2   1 10488.9 688.825   1 
   0   2  -1 10407.4 541.690   4 
   0   2   2 17175.7 1329.11   5 
   0   2   2 18856.5 788.339   1 
   0   2  -2 16112.5 960.119   1 
   0   2  -2 16894.6 813.283   4 
   0  -2   2 17961.4 965.115   1 
   0   2  -3 13263.5 800.518   4 
   0  -2   3 14132.2 895.991   1 
   0   2   3 12384.0 1108.02   5 
   0  -2  -3 13909.2 562.658   1 
   0   2   3 13305.4 592.884   1 
   0   2   4 1941.71 439.359   5 
   0   2  -4 1269.37 266.727   4 
   0  -2  -4 1600.03 119.549   1 
   0  -2   4 1975.63 338.807   1 
   0   2   4 1533.93 135.083   1 
   0   2   5 170.366 152.448   5 
   0  -2   5 47.6418 57.6738   1 
   0  -2   6 4906.56 593.791   1 
   0   2   6 5995.55 768.725   5 
   0  -2  -7 5112.52 338.515   4 
   0  -2   7 6008.53 704.862   1 
   0  -2   8 6802.44 771.400   1 
   0   2  -9 2488.94 261.817  15 
   0  -2   9 2745.34 276.804  10 
   0  -2   9 2458.97 474.226   1 
   0   2  -9 2893.98 331.713   9 
   0   2 -10 9791.69 649.023   9 
   0   2  10 7829.60 1358.83   3 
   0  -2  10 9430.87 550.089  10 
   0  -2  10 9201.72 961.488   1 
   0   2 -10 8949.36 541.609  15 
   0   2  10 6982.78 499.421  20 
   0   2  10 8296.32 1369.20   2 
   0   2  10 7996.39 625.153  26 
   0  -2  11 721.767 153.662  10 
   0   2  11 932.043 544.392   3 
   0  -2  11 692.204 132.505  18 
   0   2  11 812.900 151.700  18 
   0   2 -11 832.600 158.798  15 
   0   2  11 581.666 161.204  26 
   0   2  11 523.884 376.423   2 
   0   2 -11 799.906 177.415   9 
   0   2  11 574.354 147.445  20 
   0  -2  11 734.088 298.125   1 
   0   2 -11 951.996 176.634  16 
   0   2  12 3358.94 962.832   3 
   0   2 -12 3156.08 329.135  16 
   0  -2  12 3412.26 631.671   1 
   0   2  12 3174.76 421.235  26 
   0   2 -12 3801.18 433.896   9 
   0  -2  12 3670.12 365.424  10 
   0  -2  12 3363.79 322.506  18 
   0   2  12 3387.82 887.926   2 
   0   2  12 4199.72 369.742  18 
   0   2  12 3118.76 353.077  20 
   0   2 -12 3674.84 359.949  15 
   0   2 -13 3049.72 334.559  15 
   0   2 -13 2825.22 372.080   9 
   0   2  13 2655.90 344.382  20 
   0  -2  13 2889.62 335.346  10 
   0   2  13 2770.74 405.554  26 
   0   2  13 2589.27 301.201  18 
   0  -2  13 2656.33 298.842  18 
   0   2  13 2165.11 758.134   2 
   0   2  13 2829.62 950.427   3 
   0  -2  13 2940.34 610.203   1 
   0  -2  14 3254.28 369.445  10 
   0  -2  14 2952.36 334.225  18 
   0  -2  14 2625.91 618.081   1 
   0   2 -14 3432.77 439.154   9 
   0   2  14 2800.51 322.928  18 
   0   2 -14 3353.03 349.129  15 
   0   2  14 3026.61 1026.48   3 
   0   2  14 3149.52 387.542  20 
   0   2  14 2611.37 427.387  26 
   0   2  14 2119.63 826.244   2 
   0   2  15 1653.73 829.629   2 
   0   2  15 2227.51 303.970  18 
   0   2  15 1909.80 315.193  20 
   0   2  15 2060.79 374.003  26 
   0  -2  15 2256.14 308.643  10 
   0   2  15 2108.50 927.536   3 
   0   2 -15 2163.38 289.530  15 
   0  -2  15 2246.13 289.206  18 
   0   2 -15 2385.76 364.842   9 
   0   2  16 6321.86 522.927  18 
   0   2 -16 6087.46 499.871  15 
   0   2  16 5781.21 637.425  26 
   0  -2  16 6379.23 565.421  10 
   0   2  16 5584.05 549.917  20 
   0   2 -16 6363.94 631.896   9 
   0   2  17 8183.20 699.694  20 
   0   2 -17 8517.89 592.720  15 
   0   2  17 7983.63 771.072  26 
   0  -2  17 9782.05 721.462  10 
   0   2 -17 9264.71 781.140   9 
   0   2  17 9786.66 680.674  18 
   0   2 -18 2327.48 391.399   9 
   0   2  18 2049.70 304.248  18 
   0  -2  18 1949.81 320.185  10 
   0   2  18 1584.40 337.679  26 
   0   2  18 2093.32 350.606  20 
   0   2 -19 5223.91 581.160   9 
   0   2  19 5118.03 487.981  18 
   0  -2  19 5248.98 536.493  10 
   0   2  19 4692.78 587.863  26 
   0   2  19 4974.95 544.906  20 
   0   2 -20 5892.29 613.670   9 
   0   2  20 5131.72 605.798  26 
   0  -2  20 5304.65 543.767  20 
   0  -2  20 6116.66 592.655  10 
   0   2  20 5970.15 558.075  18 
   0   2  20 7173.13 660.259  20 
   0  -2  21 4838.27 508.990  10 
   0   2  21 4304.25 533.951  26 
   0   2  21 4760.62 530.183  20 
   0   2 -21 4724.16 522.296   9 
   0  -2  21 3386.77 443.381  20 
   0   2  21 4796.44 475.788  18 
   0  -2  22 30.1044 69.1900  10 
   0   2  22-15.8876 72.0895  26 
   0   2  23 1219.72 249.546  20 
   0  -2  23 959.757 200.573  10 
   0  -2  23 957.704 198.465  20 
   0  -2  24 176.978 72.6950  20 
   0  -2  24 339.919 130.807  10 
   0   2  24 313.401 124.571  20 
   0   2 -25 1733.47 206.993  19 
   0  -2  25 1828.98 254.122  10 
   0   2  25 1654.84 238.359  20 
   0   2  26 2004.36 232.669  20 
   0  -2  26 2037.91 246.274  10 
   0  -3   0 2896.48 417.651   1 
   0  -3   1 33852.8 1578.80   1 
   0  -3  -1 33377.9 1415.51   1 
   0   3   1 29666.8 2298.80   5 
   0   3   2 45675.3 1669.51  21 
   0   3   2 48080.0 1669.58  25 
   0   3   2 47994.1 2912.54   5 
   0  -3   2 52319.8 2097.97   1 
   0  -3  -2 44321.2 1629.04   1 
   0   3   2 50520.6 1534.96  14 
   0   3   2 50857.7 1714.86  24 
   0   3  -3 34206.1 1308.94   9 
   0   3   3 34134.6 1375.02  24 
   0  -3  -3 34760.5 1227.43   1 
   0  -3   3 38417.6 1824.12   1 
   0   3   3 41267.1 1291.93  14 
   0   3  -3 29986.3 1247.37  16 
   0   3   3 34473.6 2403.13   5 
   0   3   3 31481.9 1320.91  25 
   0   3   3 38023.1 1447.93  21 
   0   3   4 57274.1 3114.04   5 
   0   3   4 49172.7 1559.51  14 
   0   3   4 54815.7 1799.98  25 
   0   3  -4 50986.6 1536.82  15 
   0   3  -4 43544.3 1714.66  21 
   0   3  -4 53532.0 1731.87  16 
   0   3   4 56327.9 1550.72   1 
   0   3   4 46649.1 1731.60  21 
   0   3   4 50432.7 1758.93  24 
   0   3  -4 50465.9 1709.42   9 
   0  -3   4 53498.1 2312.93   1 
   0   3  -5 7862.24 545.652  24 
   0   3  -5 7621.79 537.284  25 
   0   3  -5 8011.87 585.501   9 
   0  -3   5 8579.90 880.965   1 
   0   3   5 8374.03 623.012  24 
   0   3  -5 7481.79 554.372  16 
   0   3  -5 6547.05 566.411  21 
   0   3   5 8238.63 613.236  25 
   0   3   5 7407.45 591.215  21 
   0   3   5 8799.16 1158.95   5 
   0   3  -5 6998.55 478.420  15 
   0   3   5 7357.60 496.273  14 
   0  -3   5 8275.02 498.594  10 
   0  -3   6 6153.90 436.459  10 
   0   3  -6 6023.89 480.110  24 
   0   3  -6 5572.46 492.485  16 
   0   3   6 6014.75 520.596  26 
   0   3   6 5902.37 533.479  24 
   0   3   6 5979.31 541.279  21 
   0   3   6 7440.33 1031.61   5 
   0   3  -6 6269.89 479.885  25 
   0  -3   6 6470.30 776.075   1 
   0   3  -6 6092.35 452.442  15 
   0   3   6 6341.18 459.720  14 
   0   3  -6 6060.31 520.679   9 
   0   3   6 6414.65 555.194  25 
   0   3  -6 5950.21 525.123  21 
   0   3  -7 7131.27 568.790  16 
   0   3  -7 6621.93 563.468  21 
   0  -3   7 6468.61 837.041   1 
   0   3  -7 7351.89 509.672  15 
   0   3   7 7341.97 585.069  21 
   0  -3   7 7479.24 495.115  10 
   0   3   7 5967.83 537.159  24 
   0   3  -7 6477.80 562.259   9 
   0   3   7 6796.37 481.267  14 
   0   3  -7 6992.84 517.656  24 
   0   3  -7 6187.81 505.614  25 
   0   3   7 6101.89 540.834  25 
   0   3   7 6372.91 553.744  26 
   0  -3   8 5721.30 802.744   1 
   0  -3   8 5859.97 444.340  10 
   0   3   8 5993.00 448.389  14 
   0   3   8 4683.42 477.742  21 
   0   3  -8 4910.14 471.883  21 
   0   3   8 4770.42 480.425  24 
   0   3  -8 4186.56 432.603  24 
   0   3  -8 5352.65 446.454  15 
   0   3  -8 6118.31 555.678   9 
   0   3   8 5187.13 506.211  26 
   0   3  -8 4610.74 429.131  25 
   0   3   8 5216.55 500.810  25 
   0   3  -8 6201.97 514.053  16 
   0   3   9 2798.54 395.165  26 
   0   3   9 2619.46 293.925  20 
   0   3   9 2708.85 347.407  21 
   0   3  -9 3059.79 332.326  25 
   0   3   9 2793.15 379.205  25 
   0   3  -9 2867.41 333.279  15 
   0  -3   9 3332.97 650.071   1 
   0   3  -9 2601.14 331.738  24 
   0   3  -9 2964.82 405.147   9 
   0   3  -9 3401.91 381.125  16 
   0  -3   9 3044.76 334.362  10 
   0   3   9 2902.57 396.628  24 
   0  -3  10 8491.33 585.665  10 
   0   3 -10 9142.26 734.039   9 
   0  -3  10 8460.13 1061.50   1 
   0   3  10 8944.31 584.174  20 
   0   3  10 8660.90 613.468  21 
   0   3  10 9053.32 685.494  25 
   0   3  10 8375.81 654.831  24 
   0   3  10 8257.75 695.409  26 
   0   3 -10 8340.21 591.683  15 
   0   3 -10 8660.39 647.512  16 
   0   3 -11 10289.3 700.494  16 
   0   3  11 9815.73 737.035  24 
   0   3  11 9609.09 777.173  26 
   0   3  11 7162.17 556.290  20 
   0   3 -11 9741.67 766.909   9 
   0  -3  11 9630.50 1182.72   1 
   0   3 -11 9585.60 654.119  15 
   0   3  11 10349.6 758.859  25 
   0  -3  11 9909.58 650.294  10 
   0   3  12 1266.86 237.623  24 
   0   3 -12 1080.15 205.149  15 
   0  -3  12 1307.29 226.196  10 
   0   3 -12 959.641 242.268   9 
   0   3 -12 1010.20 209.319  16 
   0   3  12 928.143 239.125  26 
   0   3  12 1080.99 204.333  20 
   0   3  12 1116.90 228.652  25 
   0   3  13 622.638 164.589  25 
   0   3  13 586.662 165.984  24 
   0   3 -13 615.830 194.035   9 
   0   3  13 620.089 156.133  20 
   0  -3  13 593.778 162.357  10 
   0   3 -13 753.411 191.100  15 
   0   3  13 647.133 210.118  26 
   0   3 -13 662.560 175.375  16 
   0   3 -14 7645.25 727.622   9 
   0   3  14 7149.83 507.568  18 
   0   3 -14 7918.21 615.961  16 
   0   3  14 6661.80 681.227  26 
   0   3  14 7414.74 604.532  20 
   0   3 -14 7770.49 619.840  15 
   0  -3  14 7361.27 602.061  10 
   0   3 -15 13246.0 817.806  15 
   0   3 -15 13564.1 998.800   9 
   0   3  15 10642.9 757.070  20 
   0   3  15 12118.6 930.628  26 
   0   3 -15 14109.8 828.464  16 
   0  -3  15 12319.2 808.907  10 
   0   3  15 10206.8 645.077  18 
   0   3 -16 13526.3 844.460  15 
   0   3 -16 13897.2 1035.43   9 
   0  -3  16 14722.7 890.225  10 
   0   3  16 15693.7 930.893  20 
   0   3  16 13620.5 753.913  18 
   0   3  16 12661.0 964.570  26 
   0   3  17 34125.7 1698.26  26 
   0   3 -17 43572.4 1912.72   9 
   0   3  17 33699.6 1510.31  20 
   0   3 -17 41330.6 1568.52  15 
   0   3  17 41217.7 1444.40  18 
   0  -3  17 40173.9 1635.83  10 
   0   3  18 12226.6 841.344  20 
   0   3  18 12869.4 951.855  26 
   0   3  18 15887.5 822.978  18 
   0  -3  18 16424.8 970.566  10 
   0   3 -18 14726.6 850.881  15 
   0   3 -18 14281.7 1030.13   9 
   0   3 -19 571.155 196.184   9 
   0  -3  19 660.202 181.386  10 
   0   3  19 348.326 116.245  18 
   0   3  19 472.614 184.513  26 
   0   3 -19 505.765 146.801  15 
   0   3  19 680.203 175.492  20 
   0   3  20 236.231 126.611  26 
   0   3  20 225.529 110.842  20 
   0  -3  20 280.531 108.790  10 
   0   3 -20 278.786 109.237  15 
   0   3 -20 211.639 130.817   9 
   0   3 -21 111.235 81.3282   9 
   0   3  21 12.4826 51.4739  20 
   0  -3  21 15.5586 41.8668  10 
   0   3  22 537.401 138.276  20 
   0  -3  22 353.827 122.703  10 
   0   3  23 68.7785 46.9613  20 
   0  -3  23 55.0305 39.4296  10 
   0   3 -24 459.686 112.005  19 
   0  -3  24 483.158 126.996  10 
   0   3  24 393.737 104.243  20 
   0   4   0 135.792 70.4362  17 
   0   4   0 124.947 86.9913  14 
   0   4   0 257.519 86.2302  16 
   0   4   0 70.1382 70.9219  25 
   0   4   0 280.133 352.317   5 
   0   4   0 69.5173 64.7559  24 
   0   4   0 54.6780 60.1866  15 
   0   4   0 274.435 133.165  21 
   0   4   1 80.6714 87.3482  21 
   0   4  -1 269.827 132.344  24 
   0   4   1 187.168 98.4365  17 
   0   4  -1 152.362 92.3900  16 
   0   4   1 107.315 88.1581  24 
   0   4  -1 218.444 266.094   5 
   0   4   1 228.916 124.848  25 
   0   4   1 200.162 110.295  26 
   0   4  -1 225.510 104.734  14 
   0   4   1 182.377 92.6955  14 
   0   4   1 148.598 68.8588  15 
   0   4  -1 110.279 21.4549  25 
   0   4   1 260.049 119.763  16 
   0   4   1-15.3850 299.384   5 
   0   4  -1 308.145 164.866  21 
   0   4  -1 114.820 48.1827  15 
   0  -4   1 109.874 151.673   1 
   0   4   2 7305.71 585.226  16 
   0   4   2 6221.18 605.392  25 
   0   4  -2 6516.13 651.475  21 
   0   4  -2 6407.24 478.198  15 
   0   4   2 5393.63 394.579  15 
   0   4   2 6352.01 1186.81   5 
   0   4   2 6503.83 486.094  17 
   0  -4   2 3686.31 590.858   1 
   0   4   2 6867.11 601.961  26 
   0   4   2 6487.28 618.369  24 
   0   4  -2 5337.66 548.290  25 
   0   4  -2 7201.22 630.778  24 
   0   4  -2 6881.16 557.874  14 
   0   4  -2 5681.83 546.784  16 
   0   4   2 5082.48 468.778  14 
   0   4   2 4862.11 571.523  21 
   0   4  -3 6084.52 569.867  25 
   0   4   3 4528.22 461.833  16 
   0   4   3 4851.74 554.977  21 
   0   4  -3 5416.77 534.760  16 
   0   4   3 5762.32 509.150  14 
   0   4   3 5499.82 575.330  25 
   0   4   3 4912.78 1042.87   5 
   0   4   3 4877.64 551.278  24 
   0   4  -3 5076.22 582.311  21 
   0   4  -3 5412.63 454.044  15 
   0   4   3 6121.01 562.767  26 
   0   4  -3 5803.08 498.978  14 
   0  -4   3 5073.60 720.511   1 
   0   4  -3 5589.40 548.549  24 
   0   4  -4 9117.96 648.633  14 
   0   4  -4 10228.3 755.344  24 
   0   4   4 10474.8 810.243  24 
   0   4   4 8173.95 622.194  14 
   0   4  -4 8825.22 607.563  15 
   0   4  -4 9744.16 730.376  16 
   0   4   4 8201.29 726.461  21 
   0   4   4 9797.03 733.531  26 
   0  -4   4 10186.3 1065.29   1 
   0   4   4 8525.37 718.578  25 
   0   4   4 8075.29 613.530  16 
   0   4   4 8822.05 1396.20   5 
   0   4  -4 10134.3 744.236  25 
   0   4  -4 9171.93 779.062  21 
   0   4  -5 14436.4 903.355  24 
   0   4   5 16146.9 1016.54  25 
   0   4  -5 12884.0 785.895  14 
   0   4   5 13705.8 771.989  16 
   0   4   5 12600.3 1686.91   5 
   0  -4   5 13739.9 769.255  10 
   0   4   5 14129.8 841.760  14 
   0   4  -5 15939.3 839.200  15 
   0   4  -5 14900.2 1012.38  21 
   0   4  -5 13561.9 888.644  16 
   0   4  -5 14783.5 906.009  25 
   0  -4   5 13173.2 1282.11   1 
   0   4   5 13406.5 950.869  21 
   0   4   5 12071.5 900.992  24 
   0   4   5 13794.8 904.799  26 
   0   4   6 67.6510 109.998  25 
   0   4   6 114.412 112.397  21 
   0  -4   6-77.3443 41.8659   1 
   0   4  -6 116.779 99.5087  21 
   0  -4   6 101.207 63.6848  10 
   0   4   6 123.707 96.4551  24 
   0   4  -6 12.3211 61.1838  16 
   0   4  -6 44.9676 40.5262  25 
   0   4  -6 131.739 92.1964  24 
   0   4   6 55.5637 45.1371  14 
   0   4  -6 98.5916 83.5078  15 
   0   4  -6 76.5924 81.1324   9 
   0   4  -6 42.5165 46.1220  14 
   0   4   6 5.68309 55.2321  26 
   0   4  -7 569.013 161.460  24 
   0   4   7 492.748 189.433  21 
   0   4  -7 654.442 217.632  16 
   0  -4   7 323.933 260.479   1 
   0   4  -7 569.009 169.341  14 
   0   4  -7 561.949 162.462  25 
   0  -4   7 575.070 155.525  10 
   0   4  -7 618.944 172.322  15 
   0   4  -7 391.283 137.080  21 
   0   4   7 505.344 190.498  25 
   0   4   7 485.889 173.931  26 
   0   4  -7 748.134 224.420   9 
   0   4   7 583.802 165.958  24 
   0   4   8 725.153 206.587  24 
   0   4  -8 1056.20 227.400  15 
   0   4  -8 906.526 196.594  14 
   0   4  -8 1037.42 242.490  16 
   0   4  -8 1161.07 267.706  21 
   0   4  -8 1155.77 257.483  25 
   0   4   8 826.971 235.781  21 
   0   4   8 720.305 221.834  25 
   0   4  -8 922.422 233.737   9 
   0  -4   8 916.766 196.887  10 
   0   4   8 1131.43 265.343  26 
   0   4  -8 1004.06 236.464  24 
   0   4  -9 254.183 122.862  15 
   0   4  -9 501.155 195.769   9 
   0   4  -9 489.169 191.080  16 
   0   4  -9 399.223 152.105  25 
   0   4  -9 364.171 139.482  24 
   0   4   9 373.217 145.664  21 
   0   4  -9 243.205 102.986  21 
   0   4   9 442.880 163.089  24 
   0   4   9 396.318 150.278  26 
   0   4   9 288.462 143.418  25 
   0  -4   9 235.424 66.6632  10 
   0  -4  10 462.798 144.482  10 
   0   4  10 439.545 162.641  25 
   0   4 -10 383.846 185.284   9 
   0   4  10 342.043 154.688  26 
   0   4  10 334.216 137.412  24 
   0   4  10 518.057 182.117  21 
   0   4 -10 283.925 104.034  15 
   0   4 -10 326.074 125.021  16 
   0   4 -11 10908.4 817.527  16 
   0   4  11 9992.33 818.190  24 
   0   4  11 10148.1 834.938  26 
   0   4  11 9439.21 718.333  21 
   0  -4  11 10427.6 722.363  10 
   0   4  11 10705.8 849.545  25 
   0   4 -11 10247.1 893.667   9 
   0   4 -11 9301.95 722.280  15 
   0   4  12 1518.99 316.392  24 
   0   4  12 1217.70 275.385  26 
   0   4  12 1700.63 315.166  25 
   0   4 -12 1610.61 358.134   9 
   0  -4  12 1640.38 281.192  10 
   0  -4  12 1161.18 208.060  13 
   0   4 -12 1721.78 304.807  15 
   0   4 -12 1516.83 295.689  16 
   0   4  13 2886.28 425.160  26 
   0   4 -13 3534.60 435.903  16 
   0   4 -13 2684.72 460.434   9 
   0   4  13 3124.07 437.843  24 
   0   4 -13 2802.86 384.996  15 
   0   4  13 2842.30 400.919  25 
   0  -4  13 3276.71 397.337  10 
   0   4 -14 9535.32 751.015  16 
   0   4  14 6605.40 610.202  24 
   0   4  14 8311.01 681.220  25 
   0  -4  14 8677.52 687.320  10 
   0   4 -14 8866.82 832.503   9 
   0   4 -14 9057.94 709.106  15 
   0   4  14 8838.68 753.116  26 
   0   4  15 2478.86 396.066  26 
   0   4 -15 2603.99 372.956  15 
   0  -4  15 2945.68 385.518  10 
   0   4 -15 2840.66 385.669  16 
   0   4 -15 2501.10 441.811   9 
   0   4  16 3766.21 473.240  26 
   0   4 -16 4389.71 469.517  15 
   0  -4  16 4447.41 471.448  10 
   0   4 -16 3975.59 557.069   9 
   0   4 -17 2983.82 468.255   9 
   0   4 -17 3171.06 390.430  15 
   0  -4  17 3381.40 416.389  10 
   0   4 -18 2225.31 310.788  15 
   0   4 -18 2127.16 320.047  22 
   0  -4  18 2363.66 331.293  10 
   0   4 -19 3396.72 356.655  15 
   0  -4  19 3704.33 407.538  10 
   0  -4  20 9957.30 661.984  10 
   0   4 -20 9625.58 576.446  15 
   0  -4  21 1827.42 266.923  10 
   0   4 -21 1710.78 224.242  19 
   0   4 -22 52.8036 43.9501  19 
   0  -4  22-28.1342 38.2005  10 
   0   5   0 73.1531 101.231  21 
   0   5   0 252.023 132.545  25 
   0   5   0 132.489 63.9549  15 
   0   5   0 84.2451 60.7209  16 
   0   5   0 349.705 154.283  24 
   0   5   1-68.1360 81.2994  21 
   0   5   1 22.7380 46.1952  15 
   0   5  -1 11.3878 21.7993  21 
   0   5   1 63.2781 85.2318  25 
   0   5   1 51.2231 69.3821  24 
   0   5  -1 22.5496 25.9496  25 
   0   5  -1 48.2502 66.4562  16 
   0   5   1 2.33412 75.6943  16 
   0   5  -1 110.207 81.4376  24 
   0   5  -1 3.20977 30.4048  15 
   0   5  -2 5033.20 584.330  25 
   0   5   2 5434.83 648.517  21 
   0   5  -2 5505.44 630.071  24 
   0   5   2 5796.14 640.082  25 
   0   5  -2 5447.39 482.844  15 
   0   5  -2 4671.57 560.638  16 
   0   5   2 5232.52 554.358  16 
   0  -5   2 4653.18 471.943  10 
   0   5   2 3825.43 530.912  24 
   0   5  -2 4650.82 610.267  21 
   0   5  -3 550.934 195.619  24 
   0   5   3 417.330 158.654  16 
   0   5  -3 552.693 156.522  15 
   0   5  -3 600.378 201.705  25 
   0  -5   3 562.936 146.996  10 
   0   5  -3 371.015 172.700  16 
   0   5   3 307.415 145.567  22 
   0   5   3 713.980 245.644  24 
   0   5   3 342.836 165.089  21 
   0   5   3 647.421 214.799  25 
   0   5  -3 432.847 165.057  21 
   0   5   4 14374.3 1053.38  24 
   0   5  -4 13714.4 818.841  15 
   0  -5   4 12283.6 753.283  10 
   0   5  -4 12889.5 953.083  24 
   0   5  -4 11945.4 994.155  21 
   0   5  -4 12445.6 930.426  25 
   0   5   4 11047.2 948.433  21 
   0   5  -4 13036.3 950.638  16 
   0   5   4 11519.7 962.801  25 
   0   5   4 11978.9 800.672  16 
   0  -5   5 8907.16 648.129  10 
   0   5   5 8347.85 811.979  24 
   0   5  -5 8609.59 840.044  21 
   0   5  -5 8933.56 781.793  24 
   0   5  -5 9523.14 799.661  25 
   0   5   5 10347.5 813.877  26 
   0   5   5 8447.38 641.005  16 
   0   5  -5 10123.0 832.637  16 
   0   5   5 7628.84 768.412  21 
   0   5   5 8735.00 819.752  25 
   0   5  -5 7835.63 632.230  15 
   0   5   6 67.7286 108.924  24 
   0   5  -6 23.6128 31.5055  21 
   0   5   6 206.527 122.651  26 
   0   5  -6 182.285 97.0276  25 
   0   5  -6 165.977 116.070  24 
   0   5   6 317.616 181.013  21 
   0   5  -6 301.671 120.674  16 
   0   5   6 163.377 130.539  25 
   0   5  -6 140.440 107.737  15 
   0  -5   6 188.324 90.0701  10 
   0   5  -7 755.843 235.819  16 
   0   5  -7 998.689 237.257  24 
   0   5  -7 768.328 250.843  21 
   0   5   7 968.930 239.884  26 
   0  -5   7 891.424 202.467  10 
   0   5  -7 806.586 209.125  15 
   0   5   7 855.158 258.760  25 
   0   5   7 741.726 244.224  24 
   0   5  -7 971.621 242.950  25 
   0   5   7 879.927 247.945  21 
   0   5  -8 22217.8 1256.43  24 
   0   5  -8 20481.3 1285.37  21 
   0   5  -8 20855.6 1116.92  15 
   0   5   8 20873.8 1277.90  25 
   0  -5   8 22180.8 1092.83  10 
   0   5  -8 23529.5 1325.29  16 
   0   5  -8 23821.8 1275.37  25 
   0   5   8 21266.9 1256.62  21 
   0   5   8 20673.5 1225.27  26 
   0   5   9 221.163 95.6318  26 
   0  -5   9 233.094 107.342  10 
   0   5  -9 66.7139 75.0328  21 
   0   5  -9 322.035 139.341  16 
   0   5   9 102.153 101.824  24 
   0   5   9 337.511 188.940  21 
   0   5   9 233.479 129.604  25 
   0   5  -9 146.584 36.6359  15 
   0   5 -10 13561.7 965.033  16 
   0   5  10 14519.6 963.414  21 
   0   5  10 13459.6 970.650  25 
   0   5  10 13679.3 914.873  26 
   0   5 -10 13700.8 881.381  15 
   0   5 -10 10990.3 856.559  21 
   0   5  10 9804.08 865.383  24 
   0  -5  10 12910.2 815.209  10 
   0   5 -11 3800.96 454.846  15 
   0  -5  11 4062.70 439.275  10 
   0   5  11 4375.08 502.363  21 
   0   5 -11 4270.36 520.879  16 
   0   5  11 4079.10 533.243  25 
   0   5  11 3847.84 509.959  24 
   0   5 -11 3582.44 343.228  19 
   0   5  11 3794.95 463.496  26 
   0  -5  12 7749.47 545.625  13 
   0   5 -12 8780.60 560.596  19 
   0   5 -12 9872.69 776.116  16 
   0   5 -12 9625.16 728.422  15 
   0   5  12 9019.80 750.739  24 
   0   5  12 9101.69 729.273  25 
   0  -5  12 9452.84 683.021  10 
   0   5  12 8331.39 691.174  26 
   0   5  13 1228.46 245.743  25 
   0  -5  13 1049.65 218.647  10 
   0   5 -13 987.693 231.306  15 
   0   5  13 1086.97 235.859  24 
   0   5 -13 1270.59 265.594  16 
   0   5 -13 1139.41 191.671  19 
   0   5 -14 659.653 182.978  15 
   0   5  14 564.499 167.900  25 
   0   5  14 478.843 140.326  24 
   0  -5  14 430.661 148.601  10 
   0   5 -14 641.344 149.542  19 
   0   5 -15 2740.96 358.297  15 
   0   5 -15 2191.36 353.044  22 
   0   5 -15 2434.66 271.946  19 
   0  -5  15 2361.76 322.430  10 
   0   5 -16 225.437 76.5394  19 
   0   5 -16 209.813 114.491  15 
   0  -5  16 310.207 122.325  10 
   0   5 -16 127.717 74.7557  22 
   0   5 -17 165.644 100.548  22 
   0  -5  17 120.313 74.5545  10 
   0   5 -17 30.0363 21.2715  19 
   0   5 -17 115.150 69.5672  15 
   0  -5  18 32.7017 20.9190  10 
   0   5 -18 67.2846 70.5245  22 
   0   5 -18 67.0014 72.7405  11 
   0   5 -18 11.6658 22.6203  15 
   0   5 -18-21.8960 28.2009  19 
   0   5 -19 532.355 102.434  19 
   0   5 -19 548.584 125.002  15 
   0  -5  19 623.195 138.947  10 
   0   6   0 1649.97 289.423  22 
   0   6   0 2385.18 393.256  25 
   0   6   0 2067.52 410.778  21 
   0   6   0 2498.43 408.393  24 
   0   6   0 2007.35 333.290  16 
   0  -6   0 1757.68 275.343  10 
   0   6  -1 3832.69 510.424  25 
   0   6  -1 3528.61 544.642  21 
   0   6   1 3735.69 543.411  21 
   0   6   1 3414.02 490.891  24 
   0   6  -1 2723.81 388.848  22 
   0  -6   1 2693.88 339.382  10 
   0   6   1 2633.13 342.430  22 
   0   6   1 2954.15 460.204  25 
   0   6  -1 2977.43 397.167  16 
   0   6  -1 3332.07 483.968  24 
   0  -6  -1 2389.73 312.517  10 
   0   6   1 3557.48 435.003  16 
   0   6   2 1310.34 301.111  25 
   0  -6  -2 770.562 179.097  10 
   0   6  -2 1412.60 271.676  16 
   0   6  -2 1451.03 332.384  21 
   0   6  -2 1308.18 303.527  25 
   0   6   2 1480.84 336.901  21 
   0   6   2 1570.08 323.311  24 
   0   6  -2 1300.86 224.805  15 
   0   6   2 1371.93 239.213  16 
   0  -6   2 1203.01 221.590  10 
   0   6  -2 855.437 241.266  22 
   0   6  -2 1577.67 320.408  24 
   0   6  -3 1263.41 257.087  22 
   0   6   3 1717.87 347.291  25 
   0   6   3 1624.10 360.171  24 
   0   6  -3 1564.20 356.077  21 
   0   6   3 1759.43 285.549  16 
   0  -6   3 1443.06 222.672  10 
   0   6  -3 1724.37 331.298  25 
   0   6   3 1504.37 332.280  21 
   0   6  -3 1712.63 309.928  16 
   0   6  -3 1640.71 250.452  15 
   0   6  -3 1404.00 310.557  24 
   0   6  -4 2922.70 434.616  24 
   0   6   4 2530.30 402.730  25 
   0   6   4 2978.57 470.485  21 
   0   6   4 2820.95 435.709  24 
   0   6  -4 2908.04 418.365  16 
   0   6  -4 2628.62 334.807  15 
   0  -6   4 2493.76 315.802  10 
   0   6  -4 3227.44 448.487  25 
   0   6   4 2648.65 322.241  16 
   0   6  -4 2680.07 404.127  22 
   0   6  -4 2525.30 452.505  21 
   0   6   5 12.4938 103.939  24 
   0   6   5-20.4973 61.5961  25 
   0   6  -5 7.35091 78.5156  21 
   0   6  -5 115.680 103.585  16 
   0   6   5-93.8916 105.005  21 
   0   6  -5 152.305 116.048  25 
   0   6  -5 35.2699 49.6691  22 
   0   6  -5 46.6684 91.4572  24 
   0  -6   5 101.196 66.4849  10 
   0   6  -5 77.3008 58.3647  15 
   0   6  -6 997.734 245.394  22 
   0  -6   6 945.669 190.745  10 
   0   6  -6 1002.58 212.204  15 
   0   6  -6 1126.78 256.881  16 
   0   6   6 799.706 275.882  21 
   0   6   6 1127.92 259.948  24 
   0   6  -6 962.345 253.583  21 
   0   6   6 1082.27 259.551  25 
   0  -6   7 1564.22 245.816  10 
   0   6  -7 1625.40 325.301  21 
   0   6   7 1546.01 307.734  21 
   0   6  -7 1759.98 276.710  15 
   0   6  -7 1069.28 251.676  22 
   0   6  -7 1811.36 325.902  16 
   0   6   7 1615.78 318.050  24 
   0   6   7 1570.89 314.622  25 
   0   6  -8 3938.49 477.634  16 
   0   6  -8 2794.76 404.055  22 
   0   6  -8 3165.70 370.891  15 
   0   6   8 3147.64 444.234  24 
   0  -6   8 3547.58 370.469  10 
   0   6   8 3573.73 451.346  25 
   0   6  -8 3659.10 468.948  21 
   0   6   8 3300.30 430.626  21 
   0   6   9 132.299 81.8856  24 
   0   6  -9 147.749 95.1771  21 
   0   6  -9-34.9748 70.3948  22 
   0  -6   9 82.0971 57.0671  10 
   0   6   9-35.3555 36.4290  21 
   0   6  -9-136.883 100.953  16 
   0   6   9 55.9355 84.6410  25 
   0   6  -9 47.1254 54.5251  15 
   0  -6  10 1146.11 193.850  10 
   0   6 -10 1443.67 277.327  16 
   0   6 -10 1229.99 220.122  15 
   0   6 -10 957.973 236.798  22 
   0   6  10 1288.31 255.307  25 
   0  -6  10 569.519 143.827  13 
   0   6  10 899.651 234.304  24 
   0   6  10 1071.33 228.015  21 
   0   6  11 1340.97 261.387  24 
   0   6 -11 1657.98 250.404  15 
   0   6 -11 1341.83 266.399  22 
   0   6  11 1337.86 226.828  21 
   0   6  11 1801.56 282.130  25 
   0   6 -11 2002.01 305.555  16 
   0  -6  11 1792.58 246.744  10 
   0   6  12-5.80648 48.7573  24 
   0   6  12 180.479 82.1966  25 
   0   6 -12 115.175 79.2705  22 
   0   6 -12 150.659 75.8386  15 
   0  -6  12 127.164 83.6815  10 
   0  -6  13 45.6845 41.9253  10 
   0   6  13 135.971 77.2820  24 
   0   6 -13 98.9069 67.0706  22 
   0   6 -13 72.0512 28.8273  15 
   0   6  13 83.5267 58.5209  25 
   0   6 -14 926.024 172.949  15 
   0   6 -14 781.128 180.673  22 
   0  -6  14 796.077 141.424  10 
   0   6 -15 297.791 108.170  11 
   0   6 -15 561.668 131.689  15 
   0   6 -15 566.520 140.312  22 
   0   7   0 3341.64 401.070  21 
   0   7   0 3512.04 390.559  24 
   0   7   0 2995.10 360.619  25 
   0   7   1 5103.77 474.623  24 
   0   7  -1 3583.62 422.645  21 
   0   7   1 3553.45 436.985  21 
   0   7   1 4635.95 445.556  25 
   0   7   2 5088.95 474.564  24 
   0   7  -2 5183.27 506.543  21 
   0   7   2 4932.38 498.065  21 
   0   7   2 5620.49 490.600  25 
   0   7   3 4290.64 424.997  25 
   0   7  -3 3389.46 389.288  21 
   0   7   3 3523.43 396.358  24 
   0   7  -3 1710.22 261.626  22 
   0   7   3 3564.02 399.298  21 
   0   7   4 355.774 128.579  21 
   0   7   4 459.297 137.863  25 
   0   7  -4 173.083 79.5799  11 
   0   7  -4 239.931 93.2443  21 
   0   7  -4 105.076 66.5204  22 
   0   7   4 486.724 145.226  24 
   0   7   5-44.0107 74.5950  21 
   0   7   5 38.3621 24.4528  25 
   0   7   5 79.9304 65.8724  24 
   0   7  -5 85.1953 75.4975  21 
   0   7  -5 75.3829 54.9651  11 
   0   7  -5 48.1637 48.2280  22 
   0   7   6 366.867 123.899  25 
   0   7  -6 165.412 89.9154  22 
   0  -7   6 102.774 55.9483  13 
   0   7  -6 219.695 99.5093  11 
   0   7   6 401.704 128.761  24 
   0   7   6 352.249 118.220  21 
   0   7  -6 322.735 109.772  21 
   0   7  -7 1.94377 39.5461  11 
   0   7  -7 49.9765 37.9844  22 
   0   7   7 57.7196 48.6055  25 
   0   7   7 51.1205 44.2188  21 
   0   7   7 83.3505 69.2076  24 
   0   7  -8 515.175 141.246  11 
   0   7  -8 698.832 157.446  22 
  -1   0  27 164.067 67.4917  20 
  -1   0  26 152.647 91.8994  26 
  -1   0  26 45.2193 72.5111  20 
  -1   0  25 678.516 166.447  20 
  -1   0  25 484.976 172.459  26 
  -1   0  25 250.654 96.5142  10 
  -1   0  24-50.3902 47.1233  26 
  -1   0  24 26.3462 41.1916  20 
  -1   0  24 7.08334 22.7454  10 
  -1   0  23 278.378 147.366  26 
  -1   0  23 460.082 148.822  10 
  -1   0  23 313.363 122.346  20 
  -1   0  22-136.235 115.492  10 
  -1   0  22-46.7920 72.2401  20 
  -1   0  21 15219.0 913.150  18 
  -1   0  21 13734.0 920.209  10 
  -1   0  21 13277.6 952.195  20 
  -1   0  20-54.3579 41.8857  20 
  -1   0  20-94.7775 68.6708  10 
  -1   0  20 31.6438 55.1383  18 
  -1   0  19 2208.54 377.023  20 
  -1   0  19 2910.54 367.888  18 
  -1   0  19 2743.07 382.636  10 
  -1   0  18-45.3461 80.3605  18 
  -1   0  18 3.14497 45.5049  10 
  -1   0  17 925.798 199.489  18 
  -1   0  17 863.367 217.710  10 
  -1   0  16 34.7530 86.3140  10 
  -1   0  16-22.3977 42.3046  18 
  -1   0  16-148.783 197.847   3 
  -1   0  16-101.779 189.951   2 
  -1   0  15 69372.6 2176.75  10 
  -1   0  15 79653.9 2224.32  18 
  -1   0  15 72668.2 4630.07   2 
  -1   0  15 70653.0 4625.04   3 
  -1   0  14 238.485 265.158   3 
  -1   0  14 58.7146 54.3393  18 
   1   0 -14-10.9072 40.7566   1 
  -1   0  14 13.2709 28.8308  10 
  -1   0  14 65.2950 157.557   2 
  -1   0  13 35416.3 2868.75   2 
  -1   0  13 36835.0 2903.06   3 
  -1   0  13 34738.8 1260.52  10 
  -1   0  13 40163.8 1313.52  18 
   1   0 -12-6.09199 90.9287   1 
  -1   0  12 27.6718 17.5963  18 
  -1   0  12 23.2925 30.7955  10 
  -1   0  12-130.801 211.001   3 
  -1   0  12 83.1286 203.266   2 
  -1   0  11 120163. 5025.98   3 
  -1   0  11 115068. 4949.22   2 
   1   0 -11 110296. 3481.16   1 
   1   0 -10 14.7290 52.8961   1 
   1   0  -9 139.278 108.378   1 
  -1   0   8 60.4206 61.7163   1 
   1   0  -8 40.9884 57.1993   1 
   1   0  -7 7361.07 535.194   1 
  -1   0   7 7277.21 515.402   1 
   1   0  -6 73.6933 56.3578   1 
  -1   0   6 42.4975 52.8578   1 
   1   0  -5 50313.8 1433.73   1 
  -1   0   5 42345.2 1331.72   1 
   1   0  -4 18.5754 12.9173   1 
  -1   0   4 32.5583 27.2233   1 
   1   0  -3 76617.8 1778.27   1 
   1   0  -3 70241.1 1806.88   1 
   1   0  -2-8.94719 22.7190   1 
  -1   0   1 65376.4 1483.42   2 
   1   0  -1 63001.0 1323.48   1 
  -1   0   1 67802.9 1492.23   3 
  -1   0   0-2.24051 11.1089   1 
  -1   0   0 14.7764 14.8271   5 
   1   0   0 2.36456 13.1549   1 
   1   0   0 34.6921 21.2979   5 
   1   0   1 159885. 3182.35   1 
  -1   0  -1 166925. 3263.82   4 
  -1   0  -1 168929. 3204.79   1 
   1   0   2-9.49086 11.3845   4 
   1   0   2 7.88918 27.7369   1 
  -1   0  -2 8.52178 14.5765   4 
  -1   0  -2 16.2649 23.9254   1 
   1   0   3 87881.1 2023.12   1 
   1   0   3 81167.1 2152.11   4 
  -1   0  -3 84893.6 2175.17   4 
  -1   0  -3 87925.0 2044.38   1 
  -1   0  -4 42.7016 40.0324   1 
  -1   0  -4-15.2062 24.2910   4 
   1   0   4 16.6895 37.6421   1 
   1   0   4 9.45544 9.39685   4 
  -1   0  -5 63775.1 2035.32   4 
  -1   0  -5 61885.0 1806.32   1 
   1   0   6 23.5160 21.8264   1 
  -1   0  -6 16.0820 46.9774   1 
  -1   0  -6-45.0142 17.3978   4 
   1   0   7 205540. 4836.49   1 
  -1   0  -7 220373. 4984.85   1 
  -1   0  -8-1.86695 63.4118   1 
   1   0   8 32.6447 52.3051   1 
   1   0   9 16375.2 911.960   1 
  -1   0  -9 13588.8 893.262   1 
   1   0  10 26.2788 45.8298   1 
   1   0  11 22273.9 1193.80   1 
   1   0  11 25825.1 966.888  18 
   1   0  11 23544.5 907.614  12 
   1   0  12 3.56554 34.9100  12 
   1   0  12-8.21463 39.5152  27 
   1   0  12-37.7699 46.1687  10 
   1   0  12 33.5754 75.8252   1 
   1   0  12 38.0209 190.170   2 
   1   0  12 87.9861 52.0132  18 
   1   0  12-7.56121 247.681   3 
   1   0  13 4306.18 928.550   3 
   1   0  13 4199.19 376.825  12 
   1   0  13 4227.45 957.885   2 
   1   0  13 4712.21 392.330  10 
   1   0  13 4710.23 409.036  18 
   1   0  13 4429.86 531.647   1 
   1   0  13 4290.77 355.276  23 
   1   0  13 4126.55 416.904  27 
   1   0  14 24.2190 268.096   2 
   1   0  14 18.2026 57.4035  12 
   1   0  14-14.9446 30.7362  18 
   1   0  14 171.273 220.845   3 
   1   0  14 4.49106 56.6758  27 
   1   0  14-8.66170 25.9964  10 
   1   0  15 105.207 100.695   3 
   1   0  15 222.757 87.5725  10 
   1   0  15 195.896 120.120  27 
   1   0  15 181.041 103.599  18 
   1   0  15 197.872 92.6201  12 
   1   0  15 27.1177 197.014   2 
   1   0  16 27.1653 77.7177  10 
   1   0  16 168.791 395.029   2 
   1   0  16 233.874 345.950   3 
   1   0  16 70.1292 72.9006  27 
   1   0  16-36.4586 25.0295  18 
   1   0  17 58235.3 2000.79  10 
   1   0  17 62187.4 2029.23  18 
   1   0  18-15.1685 24.6404  10 
   1   0  18-30.3685 41.6700  18 
  -1   0 -18 47.2573 29.6020   9 
   1   0  19 1027.96 231.196  18 
   1   0  19 897.016 217.136  10 
   1   0  20-25.6801 54.0906  18 
   1   0  20-15.3731 54.4611  10 
   1   0  21 12381.7 831.064  18 
   1   0  21 12514.9 894.080  20 
   1   0  21 11613.3 828.058  10 
   1   0  22-20.8955 63.1113  20 
   1   0  22-56.7167 91.6580  10 
   1   0  22-42.6946 82.7275  26 
   1   0  22 2.95219 40.0137  18 
   1   0  23 2246.88 362.687  20 
   1   0  23 2239.82 319.346  10 
   1   0  23 2112.64 364.919  26 
   1   0  24 24.8083 26.5556  20 
   1   0  24 26.2550 31.0216  10 
   1   0  24 111.478 119.764  26 
   1   0  25 1001.17 215.131  26 
   1   0  25 1716.73 271.212  20 
   1   0  26 81.3245 60.8250  20 
   1   0  27 340.699 92.6411  20 
  -1   1  27 244.232 83.0120  20 
  -1  -1  26 428.861 158.301  26 
  -1  -1  26 798.669 164.598  20 
  -1  -1  26 794.299 168.454  10 
  -1   1  26 719.011 156.336  20 
  -1   1  25 1690.30 294.966  26 
  -1  -1  25 1761.04 276.468  10 
   1   1 -25 1905.29 214.504  19 
  -1  -1  25 2198.05 297.333  20 
  -1   1  25 2308.93 309.050  20 
  -1  -1  25 1435.06 299.818  26 
  -1   1  24 128.514 88.1813  26 
  -1   1  24 131.644 63.9444  20 
  -1  -1  24 116.393 71.0491  20 
  -1  -1  24 228.421 122.429  10 
  -1   1  23 12896.3 981.892  26 
  -1  -1  23 13817.2 886.783  10 
  -1   1  23 14081.8 935.740  20 
  -1  -1  23 13290.4 875.137  20 
  -1  -1  22 4315.68 492.517  20 
  -1  -1  22 4801.92 512.497  10 
  -1   1  22 3913.25 469.446  10 
  -1   1  22 4090.50 556.317  26 
  -1   1  22 3877.22 486.263  20 
  -1   1  21 825.299 253.298  26 
  -1   1  21 644.701 203.157  10 
  -1  -1  21 1012.85 251.039  20 
  -1   1  21 829.595 216.929  18 
  -1   1  21 645.133 192.204  20 
  -1  -1  21 892.204 217.037  10 
  -1   1  20 958.077 208.219  18 
  -1  -1  20 1139.99 262.022  10 
  -1  -1  20 1037.69 252.435  20 
  -1   1  20 927.856 243.506  20 
  -1   1  20 1162.98 336.330  26 
  -1   1  20 894.738 240.022  10 
  -1   1  19 1543.74 304.000  20 
  -1   1  19 1249.95 249.893  18 
  -1  -1  19 1222.78 245.219  18 
  -1  -1  19 1279.51 258.903  10 
  -1   1  19 1261.18 315.172  26 
  -1   1  19 1216.84 276.744  10 
  -1   1  18 1917.77 337.122  20 
  -1   1  18 1990.15 309.736  18 
  -1  -1  18 2091.36 318.362  18 
  -1   1  18 1604.10 301.361  10 
  -1   1  18 1768.37 364.271  26 
  -1  -1  18 1985.29 320.926  10 
  -1   1  17 18218.0 1047.35  10 
  -1  -1  17 19344.7 1000.64  18 
   1   1 -17 20939.8 1090.18   9 
  -1   1  17 19722.5 1106.90  20 
  -1  -1  17 20478.6 1067.51  10 
   1   1 -16 12988.5 1410.28   1 
  -1  -1  16 13861.5 805.078  18 
  -1   1  16 14558.1 918.062  20 
   1   1 -16 13878.0 844.857   9 
  -1  -1  16 14914.3 851.427  10 
  -1   1  16 11390.1 2012.80   3 
  -1   1  16 16429.6 866.890  18 
  -1   1  16 12759.0 833.367  10 
  -1   1  16 12356.0 2075.52   2 
  -1  -1  15 1769.28 255.551  10 
  -1   1  15 2108.41 801.803   2 
  -1   1  15 1761.11 295.751  20 
  -1  -1  15 2111.92 282.511  18 
   1   1 -15 1121.25 406.340   1 
   1   1 -15 2033.16 303.211   9 
  -1   1  15 2016.37 284.190  18 
  -1   1  15 2011.42 294.623  10 
  -1   1  15 2004.24 818.244   3 
  -1  -1  14 4664.21 422.724  10 
  -1  -1  14 4603.18 405.388  18 
   1   1 -14 4385.53 432.694   9 
  -1   1  14 3930.36 403.692  10 
  -1   1  14 3991.82 1068.55   2 
  -1   1  14 4141.55 1113.71   3 
  -1   1  14 4190.37 393.727  18 
   1   1 -14 3906.88 705.479   1 
  -1  -1  13 891.650 270.224   1 
  -1  -1  13 608.731 147.976  10 
  -1  -1  13 796.270 151.746  18 
  -1   1  13 537.973 334.630   2 
  -1   1  13 558.849 146.092  10 
  -1   1  13 697.107 155.709  18 
   1   1 -13 774.102 178.962   9 
  -1   1  13 712.930 356.094   3 
  -1   1  12 3016.00 803.093   2 
  -1   1  12 2598.74 303.154  10 
  -1  -1  12 3329.39 304.592  18 
  -1   1  12 3201.69 311.100  18 
  -1  -1  12 2944.94 302.596  10 
  -1   1  12 2474.23 735.853   3 
  -1  -1  12 3588.01 562.566   1 
  -1   1  11 19741.2 1991.05   2 
  -1   1  11 18421.6 834.213  10 
   1  -1 -11 19893.5 913.939   1 
  -1  -1  11 21004.8 835.266  10 
  -1   1  11 21196.2 2064.59   3 
  -1  -1  11 19558.3 1289.45   1 
  -1  -1  10 1100.03 279.645   1 
  -1   1  10 1298.46 472.273   2 
  -1   1  10 1093.60 479.299   3 
   1  -1 -10 1105.48 177.935   1 
   1  -1 -10 1216.64 201.863   1 
   1  -1  -9 2490.82 488.957   5 
  -1  -1   9 2275.14 402.960   1 
   1  -1  -9 3168.21 294.204   1 
  -1   1   9 2330.86 570.933   2 
  -1   1   9 2446.39 567.555   3 
   1  -1  -9 2454.73 262.114   1 
  -1  -1   8 7739.02 690.898   1 
   1  -1  -8 7718.78 443.666   1 
   1  -1  -8 7470.59 795.958   5 
   1  -1  -8 7972.69 653.188   4 
  -1   1   8 8215.05 1068.35   2 
   1  -1  -8 7802.05 454.199   1 
  -1   1   8 8446.15 1091.30   3 
  -1   1   7 19201.3 1605.05   2 
   1  -1  -7 19561.2 1248.96   5 
   1  -1  -7 18322.4 977.072   4 
  -1   1   7 20123.5 1651.54   3 
  -1  -1   7 20234.7 1109.62   1 
   1  -1  -7 19548.6 744.680   1 
  -1  -1   6 820.191 193.127   1 
   1  -1  -6 945.016 253.537   5 
  -1   1   6 1075.80 342.459   2 
   1  -1  -6 928.256 123.320   1 
   1  -1  -6 877.521 120.548   1 
  -1   1   6 1055.65 398.134   3 
   1  -1  -5 29825.5 1736.80   3 
   1  -1  -5 25981.2 1255.99   5 
  -1   1   5 27780.1 1772.09   3 
   1   1  -5 28367.6 1250.43   1 
  -1  -1   5 29082.8 1222.97   1 
   1  -1  -5 29778.6 1735.86   2 
   1  -1  -5 28754.6 816.252   1 
   1  -1  -5 29714.6 849.933   1 
  -1   1   5 26493.5 1731.90   2 
   1  -1  -4 9142.70 883.022   2 
  -1  -1   4 10446.5 642.076   1 
   1  -1  -4 9188.51 646.366   5 
  -1   1   4 9391.90 945.277   3 
  -1   1   4 9410.51 953.805   2 
   1  -1  -4 10159.0 925.371   3 
   1  -1  -4 10341.9 420.314   1 
  -1   1   4 11852.9 456.527   1 
   1   1  -4 9713.38 637.117   1 
   1  -1  -3 174901. 5201.22   3 
  -1   1   3 186065. 5371.03   2 
   1  -1  -3 181633. 5242.68   2 
  -1   1   3 187495. 4058.54   1 
  -1   1   3 192660. 4494.65   5 
   1   1  -3 186104. 4435.89   1 
  -1  -1   3 193181. 4419.23   1 
  -1   1   3 181874. 5350.85   3 
  -1   1   2 387043. 8122.92   1 
   1   1  -2 396995. 8362.33   1 
   1  -1  -2 403947. 9400.95   2 
  -1  -1   2 436665. 8391.92   1 
   1  -1  -2 362086. 9245.07   3 
  -1   1   2 424502. 8602.12   5 
   1  -1  -2 423077. 8111.40   1 
  -1  -1   1 29732.0 962.880   1 
  -1   1   1 29563.1 940.967   1 
   1  -1  -1 27645.8 736.633   4 
   1  -1  -1 30644.3 927.735   1 
   1   1  -1 28649.4 964.071   1 
  -1   1   0 232954. 5294.27   1 
  -1   1   0 241961. 5084.87   4 
  -1  -1   0 249246. 5158.73   1 
   1   1   0 254300. 5187.20   1 
   1  -1   0 242631. 5086.14   4 
   1  -1   1 71121.7 1726.39   4 
  -1   1  -1 65280.3 1700.51   4 
  -1   1  -1 65401.2 1831.37   1 
   1   1   1 68140.0 1479.84   4 
   1   1   1 54662.9 2169.95   5 
  -1  -1  -1 76719.8 1564.78   1 
   1  -1   1 61667.2 1772.31   1 
   1   1   1 58873.3 1509.89   1 
   1   1   2 85990.8 2813.47   5 
   1   1   2 79431.3 1943.55   4 
  -1   1  -2 79334.1 2344.09   1 
   1  -1   2 82043.4 2314.33   1 
  -1  -1  -2 83976.7 2723.17   2 
  -1  -1  -2 83950.8 2722.11   3 
   1  -1   2 90443.5 2303.17   4 
  -1   1  -2 101540. 2376.13   4 
   1   1   3 30138.8 1487.94   2 
  -1   1  -3 31440.5 1232.09   1 
   1   1   3 31155.5 923.099   4 
   1   1   3 31903.0 1523.08   3 
  -1  -1  -3 34134.0 955.070   4 
   1  -1   3 30083.0 1179.38   1 
  -1  -1  -3 30555.4 1448.01   2 
   1   1   3 32232.5 1528.31   5 
  -1  -1  -3 31970.2 1482.15   3 
  -1  -1  -3 29697.5 1524.16   5 
  -1   1  -3 32794.3 1215.36   4 
  -1  -1  -4 54815.2 1541.09   4 
   1   1   4 55285.7 2282.47   3 
  -1  -1  -4 58454.3 2200.16   2 
  -1   1  -4 54409.8 1859.23   1 
   1   1   4 64707.9 2337.65   5 
  -1  -1  -4 51630.1 2221.65   5 
   1  -1   4 56012.7 1822.33   1 
   1   1   4 51561.7 2228.20   2 
  -1   1  -4 58516.2 1900.15   4 
  -1  -1  -4 58862.8 2203.15   3 
  -1  -1  -5 5493.18 680.357   5 
  -1  -1  -5 5865.15 427.438   4 
   1   1   5 4052.09 601.480   3 
   1   1   5 3884.64 593.112   2 
  -1   1  -5 5636.27 555.326   4 
   1  -1   5 5501.56 499.485   1 
  -1   1  -5 5256.50 508.952   1 
   1   1   6 5303.34 723.670   2 
  -1  -1  -6 5287.85 461.219   4 
   1  -1   6 5971.76 552.262   1 
   1   1   6 5187.10 712.861   3 
  -1  -1  -6 5207.52 702.718   5 
   1  -1   7 15582.1 978.601   1 
  -1  -1  -7 15089.7 451.129   1 
   1   1   7 15899.7 1351.39   2 
  -1  -1  -7 14740.2 875.792   4 
   1   1   7 15241.1 1348.08   3 
  -1  -1  -7 13693.7 424.591   1 
   1   1   8 5694.32 840.072   2 
   1   1   8 6062.57 876.038   3 
  -1  -1  -8 5029.63 272.992   1 
  -1  -1  -8 6361.72 600.339   4 
   1  -1   8 6025.17 623.499   1 
  -1  -1  -8 5557.14 291.233   1 
  -1  -1  -9 1321.44 148.124   1 
   1   1   9 1372.02 439.246   2 
  -1  -1  -9 1304.85 153.196   1 
   1   1   9 1613.96 471.240   3 
   1  -1   9 1494.07 338.137   1 
   1  -1  10 27523.6 1519.85   1 
   1   1  10 26863.7 2129.37   2 
   1   1  10 26574.1 2111.95   3 
  -1  -1 -10 22698.8 809.717   1 
   1  -1  11 6096.13 720.627   1 
   1   1  11 5029.51 978.088   3 
   1  -1  11 6083.25 420.293  10 
   1   1  11 5792.92 1070.62   2 
   1  -1  11 6190.18 435.717  23 
   1  -1  11 6581.91 426.297  18 
   1   1  11 6402.96 435.902  12 
   1   1  11 6179.60 445.202  18 
   1  -1  12 2053.86 243.748  12 
   1   1  12 1711.64 600.853   3 
   1   1  12 1702.07 234.675  10 
   1   1  12 1994.89 665.142   2 
   1  -1  12 1619.41 390.763   1 
   1   1  12 1641.54 230.632  12 
   1   1  12 1990.63 264.607  27 
   1  -1  12 1843.08 250.513  23 
   1  -1  12 1890.44 237.334  18 
   1  -1  12 2047.03 246.985  10 
   1   1  12 1891.23 251.983  18 
   1   1  13 2473.83 302.760  18 
   1  -1  13 2459.34 486.811   1 
   1   1  13 2420.25 762.896   2 
   1  -1  13 2713.61 296.637  12 
   1   1  13 2590.63 311.926  27 
  -1   1 -13 2396.70 254.652  15 
   1   1  13 2136.57 278.124  10 
   1  -1  13 2604.82 294.735  10 
   1  -1  13 2684.55 295.600  18 
   1   1  13 3091.24 838.131   3 
  -1   1 -14 3347.45 389.073   9 
   1  -1  14 2698.91 322.466  10 
   1  -1  14 2961.68 318.218  12 
   1   1  14 3129.84 853.679   3 
   1   1  14 2022.02 297.806  10 
   1  -1  14 2681.44 308.981  18 
   1   1  14 2793.53 342.716  27 
   1  -1  14 2254.68 505.894   1 
   1   1  14 2803.32 325.419  18 
   1   1  14 1762.54 674.591   2 
   1   1  15 1080.98 589.705   2 
   1   1  15 1220.13 235.362  27 
   1  -1  15 979.176 322.703   1 
   1   1  15 1501.53 249.009  18 
   1   1  15 1072.05 574.242   3 
  -1   1 -15 1430.39 261.240   9 
   1  -1  15 1198.72 202.749  12 
   1  -1  15 1241.12 215.594  18 
   1  -1  15 1307.61 229.202  10 
   1   1  15 975.436 217.951  10 
   1   1  16 2891.71 357.483  18 
  -1   1 -16 3513.60 432.637   9 
   1   1  16 1517.85 666.546   3 
   1   1  16 3088.64 367.809  10 
   1   1  16 1897.98 743.485   2 
   1  -1  16 3560.62 397.491  10 
   1  -1  16 3324.17 369.025  18 
   1   1  16 3041.30 406.081  27 
   1   1  17 3965.53 518.470  26 
   1   1  17 4345.06 450.758  18 
   1   1  17 3882.64 438.164  10 
  -1   1 -17 4636.18 518.600   9 
   1  -1  17 4337.73 452.831  10 
   1  -1  17 4469.69 458.033  18 
   1   1  17 4073.52 471.661  27 
  -1   1 -18 1659.34 310.673   9 
   1   1  18 1477.44 314.350  26 
   1  -1  18 1603.79 287.510  10 
   1   1  18 1284.93 255.834  10 
   1   1  18 1458.52 271.112  18 
   1   1  18 1318.89 282.413  27 
   1  -1  18 1615.11 273.735  18 
  -1   1 -19 17941.7 1069.37   9 
   1  -1  19 16404.5 959.709  18 
   1   1  19 17616.0 1087.51  20 
   1   1  19 15381.7 962.668  10 
   1   1  19 16013.1 1121.28  26 
   1   1  19 17649.8 990.916  18 
   1  -1  19 17580.8 1006.96  10 
  -1   1 -20 1574.14 286.626   9 
   1   1  20 1132.59 289.524  26 
   1   1  20 1047.64 250.267  20 
   1  -1  20 1873.05 311.928  10 
   1  -1  20 1494.38 273.795  18 
   1   1  20 1518.38 283.158  18 
   1   1  20 1519.32 279.224  10 
   1  -1  21 140.495 88.3407  18 
   1   1  21 102.684 87.3344  18 
   1   1  21-8.73098 50.7409  20 
   1  -1  21 59.0434 51.6154  10 
   1   1  21 144.452 114.181  10 
   1   1  21 4.32671 66.0778  26 
   1  -1  22 576.950 185.712  20 
   1  -1  22 655.249 167.674  10 
   1   1  22 875.174 202.858  18 
   1   1  22 471.561 178.882  26 
   1   1  22 761.041 216.320  20 
   1  -1  23 1615.30 289.966  20 
   1  -1  23 2406.88 340.334  10 
   1   1  23 2169.91 346.790  20 
   1   1  23 1717.17 320.177  26 
   1   1  23 2306.63 327.738  18 
   1   1  24 68.7746 61.1192  20 
   1  -1  24 140.569 82.8599  10 
   1  -1  24 135.681 70.1621  20 
   1  -1  25-35.1745 51.7736  26 
   1   1  25 33.6096 17.2576  20 
   1  -1  25 60.6320 61.1702  10 
   1  -1  25 20.6842 32.4492  20 
   1  -1  26 31.8048 23.0677  20 
   1  -1  26-6.91088 29.6550  10 
   1   1  26-20.5495 40.9045  20 
  -1   2  26 1172.23 180.642  20 
  -1  -2  26 1198.26 191.354  10 
  -1  -2  26 624.711 169.965  26 
  -1  -2  25 1454.07 235.320  10 
  -1   2  25 1447.52 227.736  20 
   1   2 -25 1290.39 177.367  19 
  -1   2  24 30.1976 35.0400  20 
  -1  -2  24 82.7630 13.5802  10 
  -1   2  23 781.687 215.756  26 
  -1  -2  23 796.047 183.326  20 
  -1  -2  23 781.333 193.863  10 
  -1   2  23 698.208 194.656  20 
  -1  -2  22 340.903 138.765  10 
  -1  -2  22 361.484 136.839  20 
  -1   2  22 248.590 120.471  20 
  -1   2  22 91.8738 38.4765  26 
  -1   2  21 2713.10 441.048  26 
  -1  -2  21 2704.43 359.974  20 
  -1  -2  21 3075.25 409.734  10 
  -1   2  21 2661.42 408.711  20 
  -1   2  20 834.196 225.111  20 
  -1   2  20 733.361 248.962  26 
  -1  -2  20 888.722 220.768  20 
   1   2 -20 1019.53 250.567   9 
  -1  -2  20 1018.35 235.748  10 
  -1   2  20 1328.73 237.125  18 
  -1   2  19 9756.47 797.496  20 
  -1   2  19 9585.17 910.740  26 
  -1  -2  19 11532.8 799.666  20 
  -1  -2  19 12435.8 855.209  10 
   1   2 -19 11995.7 884.609   9 
  -1   2  19 13285.2 809.541  18 
  -1   2  18 6230.68 526.936  18 
   1   2 -18 6270.65 625.649   9 
  -1  -2  18 6403.12 577.315  10 
  -1   2  18 4992.93 645.132  26 
  -1   2  18 5087.59 555.264  20 
  -1  -2  17 4690.79 501.000  10 
  -1   2  17 4093.51 484.536  20 
  -1   2  17 5708.59 497.140  18 
  -1   2  17 4133.63 566.009  26 
   1   2 -17 4727.97 545.401   9 
   1   2 -17 4769.46 427.076  15 
   1   2 -16 8358.91 584.167  15 
  -1   2  16 6948.36 726.379  26 
  -1  -2  16 8791.10 656.733  10 
   1   2 -16 8427.64 728.164   9 
  -1   2  16 8361.09 693.776  20 
  -1   2  16 8997.73 627.217  18 
  -1  -2  15 4872.03 471.246  10 
  -1   2  15 4094.00 462.917  20 
  -1   2  15 4277.30 554.038  26 
   1   2 -15 5355.98 556.815   9 
   1   2 -15 5163.56 446.261  15 
  -1   2  15 4680.54 423.228  18 
  -1   2  14 2007.03 924.970   3 
  -1   2  14 2606.18 427.937  26 
  -1   2  14 2702.61 308.184  18 
  -1   2  14 2508.20 348.135  20 
  -1  -2  14 2712.29 335.077  10 
  -1  -2  14 2533.33 593.508   1 
  -1   2  14 1280.51 731.062   2 
   1   2 -14 3007.54 395.280   9 
   1   2 -14 2953.58 324.713  15 
  -1   2  13 1338.63 656.881   2 
  -1  -2  13 1969.24 271.629  10 
   1   2 -13 1995.07 261.921  16 
  -1   2  13 1276.58 738.975   3 
  -1   2  13 1661.46 322.710  26 
   1   2 -13 2344.01 347.141   9 
   1   2 -13 1920.93 257.159  15 
  -1  -2  13 1703.78 462.660   1 
  -1   2  13 1685.86 278.876  20 
  -1   2  13 1641.79 232.258  18 
  -1  -2  12 1587.78 229.504  10 
  -1   2  12 990.685 591.007   2 
  -1   2  12 1313.65 237.300  24 
  -1  -2  12 1544.07 423.094   1 
  -1   2  12 1864.14 234.628  18 
   1   2 -12 1762.75 240.058  16 
  -1   2  12 1474.52 243.683  25 
  -1   2  12 1254.58 780.314   3 
   1   2 -12 1608.85 233.066  15 
  -1   2  12 1018.58 200.912  20 
  -1   2  12 1260.44 277.667  26 
   1   2 -12 1601.59 265.556   9 
  -1  -2  11 2891.23 298.726  10 
  -1   2  11 2393.14 854.402   3 
   1   2 -11 3279.17 375.286   9 
  -1  -2  11 3021.71 565.967   1 
  -1   2  11 2789.92 375.918  26 
  -1   2  11 1975.95 276.993  20 
   1   2 -11 2950.26 306.423  16 
   1   2 -11 2778.57 297.873  15 
  -1   2  11 2996.65 283.158  18 
  -1   2  11 2720.06 897.461   2 
  -1   2  10 21527.9 1110.45  26 
  -1   2  10 19947.6 2226.32   2 
  -1  -2  10 24350.1 945.623  10 
  -1  -2  10 23218.7 1574.33   1 
   1   2 -10 24542.3 1078.50   9 
  -1   2  10 23362.0 2359.47   3 
   1   2 -10 22957.8 920.735  15 
  -1   2  10 21509.8 945.746  20 
  -1  -2   9 20082.8 1408.60   1 
   1   2  -9 20004.6 939.795   9 
  -1  -2   9 21102.8 837.503  10 
  -1  -2   8 3687.86 553.435   1 
  -1  -2   7 4331.80 586.826   1 
   1  -2  -7 3808.03 287.717   4 
  -1  -2   6 927.161 258.982   1 
   1  -2  -6 563.393 79.1753   4 
  -1   2   5 2831.49 465.868   5 
   1  -2  -5 1887.97 158.243   1 
  -1   2   5 2233.19 194.100   1 
  -1  -2   5 2965.92 429.414   1 
   1  -2  -4 1021.78 142.531   1 
  -1  -2   4 1402.17 282.060   1 
  -1   2   4 1122.62 164.321   1 
  -1   2   4 1031.93 300.540   5 
   1   2  -4 890.450 220.096   4 
  -1  -2   3 40475.1 1577.10   1 
   1   2  -3 36084.1 1422.94   4 
   1  -2  -3 34332.7 1161.72   1 
  -1   2   3 40177.2 1310.69   1 
  -1   2   3 36460.2 1907.55   5 
   1   2  -2 93068.0 2749.18   1 
   1   2  -2 88369.8 2424.42   4 
  -1  -2   2 85153.5 2589.16   1 
  -1   2   2 92160.3 2477.92   1 
   1  -2  -2 92181.4 2389.34   1 
   1   2  -1 88554.1 2242.32   4 
  -1  -2   1 91253.4 2518.05   1 
  -1   2   1 95792.0 2565.84   1 
  -1   2   0 35362.0 1419.93   1 
   1   2   0 36418.2 1336.95   1 
  -1   2   0 35049.2 1025.99   4 
   1  -2   1 19537.4 997.950   1 
  -1   2  -1 21185.6 834.254   4 
  -1  -2  -1 20313.1 827.464   1 
   1   2   1 17260.9 1418.19   5 
  -1   2  -1 19306.3 1037.29   1 
  -1  -2  -2 74656.1 1879.42   1 
  -1  -2  -2 70774.8 3237.13   2 
   1   2   2 73682.1 1950.19   1 
  -1   2  -2 71464.8 2162.07   4 
   1  -2   2 82237.6 2446.65   1 
   1   2   2 71127.9 3120.68   5 
  -1  -2  -2 74255.4 3317.11   3 
   1  -2   3 19414.0 1099.19   1 
  -1  -2  -3 18317.5 1532.03   2 
  -1   2  -3 17088.4 966.030   4 
   1   2   3 20668.2 1541.10   5 
  -1  -2  -3 18369.3 1538.91   3 
   1   2   4 13544.7 1222.58   5 
  -1   2  -4 10202.8 787.848   4 
   1  -2   4 13356.0 929.086   1 
   1  -2   5 8643.36 763.247   1 
   1   2   5 9518.05 1035.49   5 
   1  -2   6 12561.9 989.073   1 
   1   2   6 13282.9 1272.03   5 
   1  -2   7 6787.75 754.429   1 
  -1  -2  -7 5903.35 407.122   4 
   1  -2   8 8186.05 862.578   1 
   1  -2   9 11202.7 1032.73   1 
  -1   2  -9 9828.24 646.406   9 
  -1   2  -9 10634.7 584.552  15 
   1  -2   9 10324.7 564.417  10 
  -1   2 -10 14025.3 704.714  15 
   1  -2  10 13775.0 693.720  10 
   1  -2  10 13063.8 1183.07   1 
  -1   2 -10 13525.1 797.180   9 
   1   2  10 13545.8 679.397  18 
   1  -2  11 6079.56 456.853  10 
  -1   2 -11 6572.21 553.043   9 
   1   2  11 5414.90 516.000  26 
  -1   2 -11 6143.16 467.741  15 
   1  -2  11 5575.65 392.698  18 
   1   2  11 6394.12 457.808  18 
   1  -2  11 6049.10 827.573   1 
  -1   2 -11 5526.21 426.579  16 
   1   2  12 204.263 76.1743  18 
   1   2  12 124.777 65.2099  20 
   1  -2  12 157.510 79.8769  18 
   1   2  12 165.542 53.4823  27 
   1  -2  12 117.780 68.2100  12 
   1   2  12 5.34128 215.151   3 
  -1   2 -12 166.857 75.5578   9 
  -1   2 -12 101.673 70.2965  15 
   1  -2  12 146.029 75.4299  10 
   1  -2  12 110.685 150.037   1 
   1   2  12 11.6475 47.8974  26 
   1   2  12 10.6672 224.187   2 
   1   2  13 2333.08 812.080   3 
   1  -2  13 2414.31 281.568  18 
   1   2  13 2150.27 308.759  20 
  -1   2 -13 2481.87 378.210   9 
   1   2  13 2210.37 352.089  26 
  -1   2 -13 2333.06 296.494  15 
   1  -2  13 2348.09 305.103  10 
   1  -2  13 2492.78 279.858  12 
   1   2  13 2571.93 311.630  18 
   1   2  13 2433.12 300.218  27 
   1   2  13 2113.06 786.509   2 
   1  -2  13 2207.83 537.607   1 
   1  -2  14 4449.57 429.988  10 
  -1   2 -14 4121.14 404.721  15 
  -1   2 -14 4201.41 490.100   9 
   1  -2  14 4205.36 385.315  12 
   1  -2  14 4523.24 794.450   1 
   1  -2  14 3855.22 372.778  18 
   1   2  14 2840.84 373.507  20 
   1   2  14 4363.73 422.728  18 
   1   2  14 3472.53 463.576  26 
  -1   2 -15 5146.69 558.577   9 
   1   2  15 5628.43 485.144  18 
  -1   2 -15 4596.45 434.045  15 
   1  -2  15 4634.06 422.533  18 
   1   2  15 4121.22 506.213  26 
   1  -2  15 5016.62 473.327  10 
   1   2  15 3687.37 433.290  20 
   1   2  16 20569.2 1245.37  26 
   1   2  16 24255.4 1112.77  18 
   1   2  16 22577.0 1186.91  20 
   1  -2  16 23202.8 1051.60  18 
  -1   2 -16 24106.7 1314.26   9 
   1  -2  16 22603.3 1119.67  10 
  -1   2 -16 22717.3 1058.09  15 
  -1   2 -17 14215.2 807.178  15 
  -1   2 -17 15778.1 1050.36   9 
   1  -2  17 15179.5 834.904  18 
   1   2  17 13918.2 931.435  20 
   1   2  17 12838.7 969.847  26 
   1   2  17 16458.3 911.626  18 
   1  -2  17 15235.4 915.662  10 
   1  -2  18 5101.19 521.357  10 
  -1   2 -18 4706.71 562.170   9 
  -1   2 -18 4252.13 409.597  15 
   1   2  18 3978.67 526.258  26 
   1   2  18 3780.04 429.881  18 
   1   2  18 4651.97 527.499  20 
  -1   2 -19 1289.05 296.714   9 
   1   2  19 1604.77 273.579  18 
   1  -2  19 1428.84 274.937  10 
   1   2  19 1183.04 278.018  20 
   1   2  19 1409.98 314.173  26 
   1   2  20 2415.50 393.340  26 
   1  -2  20 3130.19 419.377  10 
  -1   2 -20 3344.01 460.627   9 
   1   2  20 3016.24 371.716  18 
   1   2  20 3490.49 444.602  20 
   1   2  21 2766.46 402.156  26 
   1   2  21 2900.93 374.663  18 
   1  -2  21 3315.05 420.996  10 
   1  -2  21 2521.89 372.140  20 
   1   2  21 2703.21 388.423  20 
  -1   2 -21 2858.05 420.304   9 
  -1   2 -22 6741.03 604.057   9 
   1  -2  22 6898.63 585.710  20 
   1   2  22 5818.08 564.022  20 
   1  -2  22 7862.55 634.959  10 
   1   2  22 7072.28 548.904  18 
   1  -2  23 4699.82 456.260  10 
   1  -2  23 3816.10 405.053  20 
   1   2  23 4549.39 464.772  20 
   1  -2  24 3180.50 362.056  10 
   1   2  24 3846.95 390.928  20 
   1  -2  24 3073.20 325.294  20 
   1  -2  25 314.081 107.019  10 
   1   2  25 370.833 113.186  20 
  -1  -3  25 172.422 79.7516  10 
   1   3 -25 111.896 51.4146  19 
  -1  -3  24 587.416 150.296  10 
  -1   3  24 593.579 121.862  20 
   1   3 -24 591.771 125.643  19 
  -1  -3  23 95.2759 61.9071  10 
   1   3 -23 320.581 107.896  19 
  -1   3  23 236.160 89.4101  20 
  -1  -3  22 471.289 139.428  10 
  -1   3  22 476.164 135.106  20 
  -1  -3  21 1065.71 228.615  10 
  -1   3  21 940.752 212.068  26 
  -1   3  21 941.958 208.896  20 
  -1  -3  20 3555.67 430.898  10 
  -1   3  20 3062.60 435.497  26 
  -1   3  20 3033.94 378.443  20 
   1   3 -20 3097.06 442.465   9 
  -1   3  19 813.754 201.367  20 
   1   3 -19 627.134 192.903   9 
  -1   3  19 635.855 210.335  26 
   1   3 -19 809.659 170.377  15 
  -1  -3  19 1017.25 236.807  10 
  -1   3  18 9145.17 598.826  18 
   1   3 -18 9150.10 644.606  15 
  -1   3  18 8349.26 780.230  26 
  -1   3  18 7505.24 647.389  20 
  -1  -3  18 8937.80 704.683  10 
   1   3 -18 8614.69 784.213   9 
  -1   3  17 15095.1 796.085  18 
   1   3 -17 14066.3 1031.46   9 
   1   3 -17 16465.0 902.242  15 
  -1  -3  17 16526.3 972.354  10 
  -1   3  17 14276.4 917.989  20 
  -1   3  17 14468.7 1060.32  26 
  -1   3  16 371.811 118.889  18 
   1   3 -16 612.519 176.647  15 
  -1   3  16 393.969 160.568  20 
   1   3 -16 479.771 175.499   9 
  -1  -3  16 502.322 148.060  10 
  -1   3  16 298.266 167.081  26 
  -1   3  15 3142.41 404.335  20 
   1   3 -15 3127.19 465.357   9 
   1   3 -15 2729.23 350.564  15 
  -1  -3  15 2700.72 367.367  10 
  -1   3  15 2557.98 433.514  26 
   1   3 -14 5153.94 488.662  15 
   1   3 -14 5442.29 607.151   9 
  -1   3  14 5002.48 516.623  25 
  -1   3  14 5201.81 526.497  24 
  -1   3  14 4807.96 485.942  20 
   1   3 -14 5838.85 532.864  16 
  -1   3  14 4807.76 583.464  26 
  -1  -3  14 5332.76 508.898  10 
   1   3 -13 2499.69 394.177   9 
  -1  -3  13 2635.54 284.426  13 
  -1   3  13 2152.85 342.038  25 
  -1   3  13 2584.66 342.751  20 
  -1   3  13 2343.27 401.242  26 
  -1   3  13 2320.61 351.259  24 
   1   3 -13 2779.27 365.637  16 
   1   3 -13 2453.62 325.823  15 
  -1  -3  13 2797.43 353.302  10 
  -1   3  12 1283.71 237.156  20 
  -1  -3  12 1190.02 197.640  13 
  -1   3  12 1267.01 256.116  25 
  -1   3  12 1374.07 249.298  24 
   1   3 -12 1608.08 263.878  16 
   1   3 -12 1438.23 291.987   9 
  -1   3  12 1127.71 269.643  26 
  -1  -3  12 1345.77 240.133  10 
   1   3 -12 1539.90 263.734  15 
   1   3 -11 3859.95 476.434   9 
  -1  -3  11 3693.72 381.017  10 
  -1  -3  11 3583.51 705.470   1 
   1   3 -11 4001.71 432.506  16 
  -1   3  11 3259.72 408.504  25 
  -1   3  11 2951.81 344.620  20 
   1   3 -11 4309.55 425.313  15 
  -1   3  11 3451.29 463.123  26 
  -1   3  11 3514.26 430.328  24 
  -1   3  10 9358.17 754.745  26 
  -1  -3  10 11178.4 1214.30   1 
  -1   3  10 8776.48 589.077  20 
  -1   3  10 11063.0 790.405  24 
   1   3 -10 10235.7 768.576   9 
  -1   3  10 10006.9 678.391  21 
  -1   3  10 9759.61 740.727  25 
   1   3 -10 11323.9 724.007  16 
  -1  -3  10 10044.6 624.648  10 
   1   3 -10 10851.5 672.383  15 
   1   3  -9 156.908 95.2914   9 
  -1   3   9 206.831 93.0072  20 
  -1   3   9 212.918 111.068  24 
  -1  -3   9 121.276 32.7861   1 
  -1   3   9 149.500 107.641  26 
   1   3  -9 154.307 79.1057  16 
  -1   3   9 216.601 96.1255  25 
  -1  -3   9 237.818 97.4109  10 
  -1   3   9 225.049 101.275  21 
  -1   3   9 219.128 103.071  14 
   1   3  -9 191.734 80.0195  15 
   1   3  -8 3387.88 373.667  25 
  -1  -3   8 4064.92 363.830  10 
   1   3  -8 3587.81 395.680  21 
   1   3  -8 3714.17 398.013  16 
  -1   3   8 3837.82 354.379  14 
   1   3  -8 3759.88 362.673  15 
  -1   3   8 3612.08 440.360  24 
  -1   3   8 3430.17 419.009  25 
   1   3  -8 3749.78 427.619   9 
  -1   3   8 3282.41 416.288  26 
   1   3  -8 3336.80 366.965  24 
  -1   3   8 3210.15 311.694  20 
  -1   3   8 3102.23 399.812  21 
  -1  -3   8 3609.69 622.158   1 
   1   3  -7 23085.7 1013.92  25 
   1   3  -7 23394.6 966.528  15 
  -1   3   7 20759.4 1084.68  25 
   1   3  -7 21027.7 1042.17  21 
   1   3  -7 21769.1 1053.50  16 
  -1   3   7 23353.0 1156.87  24 
  -1   3   7 21896.1 1068.27  21 
  -1   3   7 21425.7 1108.88  26 
   1   3  -7 22218.1 1013.50  24 
  -1  -3   7 25741.0 1683.62   1 
   1   3  -7 23808.3 1126.22   9 
  -1   3   7 22446.5 949.906  14 
  -1  -3   7 22447.5 920.502  10 
   1   3  -6 30700.7 1176.79  25 
   1   3  -6 28594.2 1233.04   9 
  -1   3   6 26848.5 1223.64  21 
   1   3  -6 28926.8 1160.69  24 
  -1  -3   6 29411.0 1041.84  10 
  -1  -3   6 28663.4 1724.91   1 
  -1   3   6 22610.9 1002.90  14 
  -1   3   6 34123.9 2180.39   5 
   1   3  -6 25231.5 1177.05  21 
   1   3  -6 29638.1 1193.53  16 
   1   3  -6 29929.4 1100.16  15 
  -1   3   6 31175.8 1310.79  25 
  -1   3   6 26673.3 1245.24  24 
  -1   3   6 25880.5 1224.93  26 
  -1  -3   5 10471.2 564.044  10 
   1   3  -5 12015.4 696.253  16 
  -1   3   5 9698.04 677.545  21 
   1   3  -5 9898.73 675.591  21 
  -1   3   5 9715.30 711.223  24 
  -1   3   5 10665.2 1202.01   5 
  -1   3   5 9148.31 676.149  25 
   1   3  -5 10910.1 594.879  15 
   1   3  -5 11636.1 720.948   9 
   1   3  -5 11000.0 666.303  24 
  -1   3   5 9888.54 689.561  26 
   1   3  -5 11217.1 667.689  25 
  -1  -3   5 10876.3 997.730   1 
  -1   3   5 10491.1 610.579  14 
   1   3  -4 3703.44 376.239  25 
   1   3  -4 3806.07 376.429  16 
   1   3  -4 3296.96 372.510   9 
  -1  -3   4 3416.25 530.268   1 
  -1   3   4 3771.83 420.572  24 
  -1   3   4 3596.45 392.891  21 
  -1   3   4 3220.16 323.170  14 
  -1   3   4 3780.55 412.449  25 
  -1   3   4 3618.49 711.018   5 
   1   3  -4 4445.05 360.858  15 
  -1   3   4 3346.67 376.822  26 
   1   3  -4 3034.59 343.763  24 
   1   3  -4 3262.39 388.320  21 
   1  -3  -4 3574.79 320.912   1 
  -1   3   3 8235.05 1102.70   5 
  -1  -3   3 8779.67 811.909   1 
   1  -3  -3 8435.13 587.795   1 
  -1   3   3 7218.10 583.135  21 
   1   3  -3 7148.69 531.202  16 
   1   3  -3 7770.70 566.273  24 
  -1   3   3 6699.57 559.976  24 
  -1   3   3 8225.83 520.860  14 
   1   3  -3 7532.31 547.266  25 
  -1   3   3 8361.72 618.306  25 
   1   3  -3 6844.86 452.417  15 
  -1  -3   2 25913.6 1395.18   1 
   1   3  -2 25811.7 1098.02  25 
  -1   3   2 26525.2 1187.16  24 
  -1   3   2 25660.4 1158.16  21 
  -1   3   2 28299.5 1208.65  25 
   1   3  -2 22527.3 1051.63  24 
   1  -3  -2 26311.0 1211.06   1 
  -1   3   2 29727.9 1069.30  14 
  -1   3   2 25149.6 2016.67   5 
  -1  -3   1 184.061 88.2016   1 
   1  -3  -1 255.434 114.343   1 
  -1   3   1 208.364 85.4742  14 
  -1  -3   0 35817.9 1514.51   1 
   1  -3   0 33295.9 1560.46   1 
  -1  -3  -1 8603.14 636.396   1 
   1  -3   1 8668.23 774.057   1 
   1   3   1 7627.47 1161.09   5 
   1   3   1 7696.00 493.702  14 
   1   3   1 8282.09 575.234  25 
   1   3   1 7874.31 569.389  24 
   1   3   1 7670.97 587.939  21 
   1   3   2 35304.3 1350.30  25 
   1   3   2 41089.4 1287.82  14 
  -1   3  -2 39549.9 1388.41  26 
   1  -3   2 39029.1 1822.99   1 
  -1   3  -2 31749.1 1283.21  16 
   1   3   2 32271.7 1316.66  24 
   1   3   2 33273.9 2472.39   5 
   1   3   2 29519.6 1305.35  21 
  -1   3  -3 35927.1 1346.92   9 
  -1   3  -3 32250.6 1326.53  16 
   1   3   3 35254.8 1408.46  21 
  -1   3  -3 31861.3 1153.78  15 
   1   3   3 37634.9 1412.13  25 
   1   3   3 35984.4 2564.14   5 
   1   3   3 32146.5 1339.78  24 
  -1   3  -3 38562.5 1301.58  17 
   1   3   3 38065.2 1276.12  14 
   1  -3   3 39872.6 1909.31   1 
   1   3   3 45694.2 1435.98   1 
  -1   3  -4 7924.56 522.845  17 
  -1   3  -4 6329.67 510.798   9 
   1  -3   4 6405.59 750.336   1 
   1   3   4 6580.63 527.544  21 
   1   3   4 7289.96 566.179  24 
   1   3   4 5976.51 447.615  14 
   1   3   4 6678.33 540.406  25 
   1   3   4 7219.80 1109.09   5 
  -1   3  -4 7019.30 464.617  15 
  -1   3  -4 6528.49 531.764  16 
   1   3   5 336.407 235.448   5 
  -1   3  -5 194.883 69.3499   9 
   1   3   5 356.427 103.210  25 
   1   3   5 198.284 77.7410  14 
   1  -3   5 321.468 189.151   1 
  -1   3  -5 260.278 114.372  16 
  -1   3  -5 256.560 100.482  17 
   1   3   5 51.6981 51.0775  21 
   1   3   5 273.803 112.743  24 
  -1   3  -5 161.569 79.5207  15 
   1   3   6 4983.56 417.335  14 
   1  -3   6 6591.45 452.245  10 
  -1   3  -6 6203.61 520.055  16 
   1   3   6 6859.17 561.379  24 
  -1   3  -6 5874.84 473.363  24 
  -1   3  -6 5823.42 469.883  25 
   1  -3   6 5658.77 760.946   1 
  -1   3  -6 6395.75 542.482   9 
   1   3   6 6094.59 513.020  21 
   1   3   6 6285.78 1017.11   5 
   1   3   6 7010.98 563.743  25 
  -1   3  -6 5802.38 428.109  14 
  -1   3  -6 5681.88 447.669  15 
   1  -3   7 355.856 138.123   1 
  -1   3  -7 427.631 124.372  25 
   1   3   7 384.152 140.005  24 
   1   3   7 524.415 155.730  26 
   1   3   7 418.338 146.369  21 
   1  -3   7 687.157 148.373  10 
  -1   3  -7 469.250 138.451  24 
   1   3   7 518.257 149.862  25 
  -1   3  -7 510.487 146.539  16 
  -1   3  -7 464.748 129.847  15 
  -1   3  -7 452.547 115.808  14 
  -1   3  -7 446.768 141.710  21 
  -1   3  -7 620.634 173.327   9 
  -1   3  -8 1484.24 229.775  15 
   1   3   8 1160.83 228.872  24 
  -1   3  -8 1039.06 231.222   9 
  -1   3  -8 1084.36 235.122  21 
   1  -3   8 1156.57 189.707  10 
   1   3   8 1391.20 249.257  25 
  -1   3  -8 1058.14 212.172  16 
   1  -3   8 1253.07 372.572   1 
   1   3   8 1225.99 252.081  26 
   1   3   8 943.215 219.783  21 
  -1   3  -9 3523.46 391.530  16 
   1   3   9 3345.36 403.349  26 
  -1   3  -9 2774.70 382.771  21 
  -1   3  -9 3450.89 427.887   9 
   1  -3   9 3465.63 652.809   1 
   1   3   9 3428.25 402.439  25 
   1   3   9 3510.84 407.589  24 
   1  -3   9 3451.84 355.977  10 
  -1   3  -9 3268.38 358.394  15 
   1   3   9 3798.39 393.575  21 
  -1   3 -10 1893.99 333.833   9 
   1   3  10 1696.86 278.383  24 
   1   3  10 1845.62 300.129  26 
  -1   3 -10 1860.85 298.897  16 
   1   3  10 1873.27 292.836  25 
   1  -3  10 2099.15 524.326   1 
  -1   3 -10 1591.64 260.601  15 
   1  -3  10 1893.28 275.968  10 
   1   3  10 1647.85 238.610  20 
   1   3  10 1556.53 269.266  21 
  -1   3 -11 4361.75 512.021   9 
   1  -3  11 4711.83 434.595  10 
   1  -3  11 3966.57 761.693   1 
   1   3  11 4696.07 458.379  25 
   1   3  11 4047.92 435.136  24 
  -1   3 -11 4771.30 457.290  15 
   1   3  11 3749.99 384.686  20 
  -1   3 -11 4907.24 473.159  16 
   1   3  11 4097.54 484.645  26 
   1   3  12 18668.8 839.307  18 
   1   3  12 14703.4 832.371  20 
  -1   3 -12 15989.7 1055.13   9 
   1   3  12 15472.3 978.150  26 
   1  -3  12 17120.2 910.802  10 
  -1   3 -12 18272.6 965.399  16 
  -1   3 -12 17523.9 942.266  15 
   1   3  13 14437.9 965.274  26 
  -1   3 -13 15457.4 1054.36   9 
  -1   3 -13 15868.5 894.711  16 
   1  -3  13 15931.1 887.503  10 
  -1   3 -13 15433.9 889.183  15 
   1   3  13 12993.7 800.900  20 
   1   3  13 16045.8 804.678  18 
  -1   3 -14 32592.9 1392.85  15 
   1  -3  14 33447.2 1391.42  10 
  -1   3 -14 34054.6 1369.67  16 
   1   3  14 30861.8 1227.80  18 
   1   3  14 28738.3 1457.31  26 
  -1   3 -14 31163.7 1595.66   9 
   1   3  14 36030.1 1437.03  20 
  -1   3 -15 6402.14 572.625  15 
   1   3  15 6153.30 619.465  26 
   1   3  15 6338.92 563.533  20 
  -1   3 -15 7390.55 739.481   9 
   1  -3  15 7142.01 609.106  10 
   1   3  15 7503.22 548.472  18 
  -1   3 -16 3352.06 508.959   9 
   1   3  16 3027.73 342.104  18 
   1  -3  16 3628.11 431.990  10 
  -1   3 -16 3388.46 408.121  15 
   1   3  16 3236.28 447.192  26 
   1   3  16 3133.64 402.848  20 
   1   3  17 7286.13 637.557  20 
   1   3  17 12229.0 716.859  18 
  -1   3 -17 10325.7 889.943   9 
   1   3  17 8177.90 730.396  26 
   1  -3  17 10475.7 766.078  10 
  -1   3 -17 9910.46 712.107  15 
   1  -3  18 3255.25 411.196  10 
   1   3  18 2767.68 377.404  20 
   1   3  18 2918.14 330.746  18 
  -1   3 -18 3465.19 407.902  15 
  -1   3 -18 3145.56 478.059   9 
   1   3  19 1167.34 243.076  20 
   1  -3  19 1311.69 263.099  10 
  -1   3 -19 1620.54 349.514   9 
  -1   3 -19 1236.48 225.793  15 
   1   3  19 1197.60 215.035  18 
   1  -3  20 905.437 203.630  10 
   1   3  20 624.690 141.268  18 
   1   3  20 710.860 171.616  20 
  -1   3 -20 863.557 179.410  15 
  -1   3 -20 869.347 231.109   9 
   1   3  21 84.4470 54.5424  20 
  -1   3 -21 146.612 106.416   9 
   1  -3  21 285.259 114.958  10 
   1  -3  22 300.556 120.784  10 
  -1   3 -22 222.546 123.809   9 
   1   3  22 301.730 103.915  20 
   1  -3  23 1797.34 249.686  10 
   1   3  23 1514.08 215.326  20 
   1  -3  24 5473.21 422.061  10 
   1   4 -23 1105.27 152.316  19 
  -1  -4  22 746.436 151.085  10 
   1   4 -22 807.800 149.252  19 
  -1  -4  21 1896.75 267.586  10 
   1   4 -21 1978.86 243.559  19 
  -1  -4  20 1686.66 264.871  10 
   1   4 -20 1800.97 236.968  15 
   1   4 -20 1618.47 230.512  19 
   1   4 -19 4745.29 425.880  15 
  -1  -4  19 5187.90 490.475  10 
  -1   4  18 1044.21 191.878  20 
   1   4 -18 1369.24 249.758  15 
   1   4 -18 1011.17 193.856  22 
  -1   4  18 1204.56 254.590  26 
  -1  -4  18 1239.04 243.924  10 
  -1   4  17 10073.6 653.988  20 
   1   4 -17 11542.0 755.021  15 
  -1  -4  17 11233.6 768.402  10 
  -1   4  17 10105.7 797.860  26 
   1   4 -17 9997.60 738.103  22 
   1   4 -16 7865.41 635.540  15 
  -1  -4  16 8046.66 652.150  10 
  -1   4  16 7231.59 688.006  26 
  -1   4  16 7015.83 546.687  20 
  -1  -4  15 3155.49 392.486  10 
  -1   4  15 2827.85 438.359  26 
  -1   4  15 2838.08 401.228  24 
   1   4 -15 2984.36 393.817  15 
  -1   4  15 2475.64 367.346  25 
  -1   4  15 2881.25 349.510  20 
  -1   4  14 1519.52 302.481  24 
  -1   4  14 1631.66 306.046  25 
  -1   4  14 2087.68 378.097  26 
  -1  -4  14 1818.03 298.086  10 
   1   4 -14 2313.84 362.422  16 
   1   4 -14 2158.11 394.207   9 
   1   4 -14 2202.19 328.768  15 
  -1   4  13 5852.62 647.939  25 
   1   4 -13 5855.32 566.161  15 
  -1   4  13 4438.76 541.826  24 
   1   4 -13 5387.69 637.738   9 
  -1  -4  13 5599.74 459.256  13 
  -1   4  13 4985.65 586.734  26 
   1   4 -13 6761.01 625.602  16 
  -1  -4  13 6190.11 554.108  10 
   1   4 -12 32.1462 28.6640  15 
  -1   4  12-82.5424 74.2829  26 
   1   4 -12 10.4059 116.409   9 
  -1  -4  12 12.3946 33.1561  13 
  -1  -4  12 114.307 70.1184  10 
  -1   4  12 131.632 134.050  24 
  -1   4  12 61.5013 84.0620  25 
   1   4 -12 89.6919 103.059  16 
  -1   4  11 469.813 172.905  26 
   1   4 -11 443.497 135.450  15 
  -1   4  11 542.932 209.027  24 
   1   4 -11 725.059 229.689   9 
   1   4 -11 401.597 143.866  16 
  -1  -4  11 689.594 164.245  10 
  -1   4  11 528.989 184.628  25 
  -1   4  11 468.463 172.989  21 
   1   4 -10 9853.74 757.543  16 
   1   4 -10 8282.77 784.554   9 
  -1   4  10 6723.92 687.045  24 
   1   4 -10 8559.81 662.994  15 
  -1   4  10 8002.65 680.925  21 
  -1  -4  10 8809.22 639.716  10 
  -1   4  10 9195.66 788.200  26 
  -1   4  10 7238.38 707.799  25 
  -1   4   9 2722.62 418.969  25 
  -1   4   9 3035.24 437.652  26 
   1   4  -9 2640.52 354.881  15 
   1   4  -9 2724.01 406.826  21 
   1   4  -9 2882.61 454.559   9 
  -1   4   9 3229.42 468.324  24 
   1   4  -9 3193.29 427.258  16 
  -1  -4   9 3369.54 376.903  10 
  -1   4   9 2965.90 411.938  21 
  -1   4   8 9540.36 754.558  21 
  -1   4   8 10257.8 705.319  14 
  -1   4   8 9932.41 824.468  25 
  -1   4   8 9875.54 800.634  26 
   1   4  -8 9067.85 744.198  16 
  -1  -4   8 9727.83 656.138  10 
   1   4  -8 7961.12 619.702  15 
  -1   4   8 9276.67 798.206  24 
   1   4  -8 9754.24 733.039  25 
   1   4  -8 9586.02 735.893  24 
   1   4  -8 8210.44 732.659  21 
  -1  -4   7 17644.7 881.836  10 
  -1   4   7 15693.6 907.320  14 
   1   4  -7 16710.7 902.533  15 
  -1   4   7 18075.9 1088.36  26 
   1   4  -7 17303.4 1010.34  25 
   1   4  -7 19043.0 1052.06  24 
  -1   4   7 17709.0 1128.08  24 
   1   4  -7 17734.6 1087.95  21 
  -1  -4   7 15256.9 1478.41   1 
  -1   4   7 18462.0 1137.74  25 
   1   4  -7 16932.5 1033.51  16 
  -1   4   6 462.759 137.510  16 
  -1   4   6 317.872 151.276  24 
  -1   4   6 430.680 125.706  14 
  -1   4   6 471.792 173.602  21 
   1   4  -6 463.958 172.956  24 
   1   4  -6 564.727 148.567  15 
   1   4  -6 558.180 168.348  16 
  -1   4   6 424.295 166.438  26 
  -1  -4   6 321.098 209.305   1 
  -1   4   6 476.683 186.265  25 
   1   4  -6 543.410 190.761  21 
   1   4  -6 345.740 125.605  25 
  -1  -4   6 548.383 144.373  10 
  -1  -4   5 5867.36 466.536  10 
   1   4  -5 5103.85 558.071  21 
  -1   4   5 5722.32 586.373  21 
   1   4  -5 5378.84 541.423  25 
  -1   4   5 4031.16 524.197  24 
  -1  -4   5 4784.62 761.173   1 
   1   4  -5 5236.71 542.659  24 
  -1   4   5 4591.65 545.532  25 
  -1   4   5 5571.29 566.279  26 
   1   4  -5 5371.64 543.102  16 
   1   4  -5 4684.03 444.776  15 
   1   4  -5 5176.07 475.536  14 
  -1   4   5 4954.23 486.098  14 
  -1   4   5 5000.45 474.196  16 
  -1  -4   4 3694.23 630.164   1 
  -1   4   4 3971.48 485.183  25 
  -1   4   4 3787.75 369.926  17 
  -1   4   4 4501.89 458.839  14 
   1   4  -4 4612.11 446.025  14 
   1   4  -4 3696.87 479.610  21 
   1   4  -4 4153.99 479.084  25 
   1   4  -4 4287.70 406.812  15 
  -1   4   4 4239.12 515.795  24 
  -1   4   4 4064.71 472.230  26 
   1   4  -4 3782.41 442.668  16 
  -1   4   4 4309.88 545.153  21 
  -1   4   4 3107.16 381.507  16 
   1   4  -4 4356.80 490.722  24 
  -1  -4   4 3632.42 368.271  10 
  -1  -4   3 5143.81 701.977   1 
  -1   4   3 6177.96 479.152  17 
   1   4  -3 5836.82 561.086  24 
  -1   4   3 5271.86 561.622  25 
   1   4  -3 5788.48 613.844  21 
  -1   4   3 5030.59 581.284  21 
  -1   4   3 5923.82 1093.10   5 
  -1   4   3 5294.26 571.699  24 
  -1   4   3 6835.19 611.245  26 
   1   4  -3 5609.42 499.586  14 
   1   4  -3 6067.12 581.641  25 
  -1   4   3 5564.07 524.529  16 
  -1   4   3 6224.54 536.571  14 
   1   4  -3 5942.28 551.498  16 
   1   4  -3 6101.68 481.526  15 
  -1   4   2 654.571 174.852  14 
   1   4  -2 777.118 195.824  25 
  -1   4   2 802.708 206.946  25 
   1   4  -2 818.574 168.643  15 
   1   4  -2 699.184 166.811  14 
  -1   4   2 729.391 194.356  16 
   1   4  -2 608.764 508.406   5 
   1   4  -2 689.253 193.794  16 
  -1   4   2 853.418 174.317  17 
  -1   4   2 795.606 222.502  24 
   1   4  -2 630.572 183.567  24 
  -1   4   2 665.151 451.687   5 
  -1   4   2 838.023 198.721  26 
  -1   4   2 864.104 212.876  21 
  -1  -4   2 696.553 248.639   1 
   1   4  -2 677.537 242.216  21 
  -1   4   1 1216.95 231.511  14 
  -1   4   1 1562.87 208.516  15 
  -1   4   1 1451.47 297.236  24 
  -1   4   1 802.632 360.256   5 
   1   4  -1 1592.93 266.788  14 
   1   4  -1 1663.06 276.895  16 
  -1   4   1 1601.65 287.531  16 
   1   4  -1 1347.85 282.591  24 
   1   4  -1 1562.33 679.221   5 
  -1   4   1 1296.77 295.349  21 
   1   4  -1 1606.96 292.242  25 
  -1   4   1 1750.04 302.259  26 
  -1   4   1 1358.50 281.734  25 
   1   4  -1 1724.43 240.615  15 
   1   4  -1 1525.88 304.469  21 
  -1   4   1 1836.51 265.415  17 
   1   4   0 8275.94 525.113  15 
  -1   4   0 8745.71 727.179  24 
  -1   4   0 8914.80 645.533  14 
   1   4   0 8347.37 698.154  25 
  -1   4   0 9557.56 632.317  17 
   1   4   0 9134.65 760.622  21 
  -1   4   0 7807.41 715.192  21 
   1   4   0 8231.16 633.106  16 
   1   4   0 9530.13 740.509  24 
  -1   4   0 6771.28 606.634  16 
  -1   4   0 7780.21 1403.71   5 
  -1   4   0 8609.54 538.085  15 
   1   4   0 9026.83 641.013  14 
   1   4   0 7336.57 1381.25   5 
  -1   4   0 8770.31 723.032  25 
  -1   4   0 10216.8 743.175  26 
   1  -4   1 17672.0 1312.91   1 
   1   4   1 21412.1 1151.64  24 
   1   4   1 19065.3 2251.69   5 
   1   4   1 20502.2 1115.10  25 
  -1   4  -1 20270.0 1084.92  16 
   1   4   1 22359.6 1050.53  14 
  -1   4  -1 21197.8 912.383  15 
   1   4   1 16431.4 790.385  15 
  -1   4  -1 20250.9 1120.06  25 
   1   4   1 19140.7 1146.07  21 
  -1   4  -1 16275.6 1036.88  24 
  -1   4  -1 17196.3 1109.06  21 
  -1   4  -1 24228.2 1060.61  17 
   1   4   1 20935.7 1031.33  16 
  -1   4  -1 18640.2 981.457  14 
   1   4   2 7172.35 591.259  26 
  -1   4  -2 5533.86 453.873  15 
  -1   4  -2 6629.14 604.762  25 
   1  -4   2 6428.52 806.675   1 
   1   4   2 6100.20 600.502  25 
   1   4   2 5715.19 499.979  14 
  -1   4  -2 6427.87 605.929  24 
   1   4   2 5933.35 596.892  24 
  -1   4  -2 6617.90 542.135  17 
   1   4   2 5470.56 1179.24   5 
  -1   4  -2 6467.49 581.325  16 
   1   4   2 7819.12 586.242  16 
   1   4   2 5642.38 600.560  21 
  -1   4  -2 5947.43 526.390  14 
  -1   4  -2 8264.60 736.965  21 
   1   4   2 5342.40 397.091  15 
   1   4   3 25265.8 1178.59  14 
  -1   4  -3 25025.1 1376.96  21 
   1   4   3 29978.1 1218.87  16 
  -1   4  -3 24265.6 1069.89  15 
   1  -4   3 23857.5 1678.34   1 
   1   4   3 24462.0 2508.35   5 
  -1   4  -3 28815.6 1349.31  16 
   1   4   3 28897.2 1365.40  25 
  -1   4  -3 27751.3 1310.85  25 
   1   4   3 26439.9 1336.31  24 
   1   4   3 25246.0 1342.17  21 
  -1   4  -3 26575.4 1306.76  24 
   1   4   3 28036.4 1267.80  26 
  -1   4  -3 33600.1 1313.77  14 
   1   4   4 1369.51 275.534  24 
   1   4   4 1262.57 288.707  21 
   1   4   4 1013.87 204.092  16 
  -1   4  -4 887.169 193.105  14 
  -1   4  -4 997.853 227.788  25 
  -1   4  -4 1023.85 225.821  24 
  -1   4  -4 1156.29 257.521  21 
   1  -4   4 953.994 337.004   1 
  -1   4  -4 1442.43 235.821  15 
   1   4   4 1150.85 229.497  26 
   1   4   4 866.377 503.486   5 
   1   4   4 1490.43 293.597  25 
  -1   4  -4 972.493 240.871  16 
  -1   4  -5 4159.96 430.674  14 
   1  -4   5 3357.55 651.029   1 
   1  -4   5 4018.51 398.995  10 
   1   4   5 4777.39 435.139  16 
  -1   4  -5 3999.89 509.921  21 
   1   4   5 3473.78 463.029  24 
  -1   4  -5 4125.65 463.638  24 
   1   4   5 3336.79 462.405  25 
  -1   4  -5 4157.27 422.836  15 
  -1   4  -5 3969.01 484.536   9 
  -1   4  -5 3994.95 448.616  25 
  -1   4  -5 3643.97 451.656  16 
   1   4   5 3618.95 488.381  21 
   1   4   5 3827.60 448.789  26 
   1   4   5 3056.77 771.666   5 
  -1   4  -6 2407.68 390.751  21 
   1   4   6 1664.76 314.450  21 
  -1   4  -6 2336.78 341.112  25 
   1   4   6 1750.46 315.852  24 
   1  -4   6 2469.81 313.698  10 
  -1   4  -6 1690.63 309.388  16 
   1   4   6 1106.45 257.250  25 
  -1   4  -6 2137.54 356.286   9 
   1   4   6 2028.09 327.389  26 
  -1   4  -6 1792.88 310.588  24 
   1  -4   6 1559.40 454.533   1 
  -1   4  -6 2296.51 306.648  15 
  -1   4  -6 2015.61 295.363  14 
  -1   4  -7 4185.72 464.703  25 
   1  -4   7 4274.95 421.878  10 
  -1   4  -7 3982.28 504.019   9 
   1   4   7 3443.49 458.169  24 
   1   4   7 3590.64 469.970  21 
  -1   4  -7 4525.55 551.623  21 
   1   4   7 2580.54 404.546  25 
  -1   4  -7 3270.91 378.020  14 
  -1   4  -7 4067.65 461.027  24 
   1   4   7 3659.59 460.972  26 
  -1   4  -7 3691.92 464.649  16 
  -1   4  -7 4302.85 443.215  15 
   1   4   8 1968.67 344.231  24 
  -1   4  -8 2761.97 347.562  14 
   1   4   8 2044.65 360.296  26 
   1   4   8 1917.00 339.768  25 
  -1   4  -8 2312.09 342.756  25 
   1  -4   8 2512.58 331.675  10 
  -1   4  -8 2378.39 368.248  16 
  -1   4  -8 2455.29 394.628  21 
  -1   4  -8 2688.59 425.592   9 
   1   4   8 2891.97 416.788  21 
  -1   4  -8 2392.15 338.454  15 
  -1   4  -8 2640.01 364.740  24 
  -1   4  -9 2917.57 383.339  25 
  -1   4  -9 2652.80 407.010  16 
   1   4   9 2891.45 426.064  24 
  -1   4  -9 2306.09 388.238   9 
   1   4   9 2613.09 398.724  25 
  -1   4  -9 2928.96 384.646  24 
   1  -4   9 2840.66 359.342  10 
  -1   4  -9 2774.96 408.640  21 
   1   4   9 2737.74 383.835  21 
   1   4   9 2282.44 358.025  26 
  -1   4  -9 2772.00 369.347  15 
   1   4  10 2104.13 354.339  25 
  -1   4 -10 1964.48 341.515  21 
   1   4  10 2127.38 367.894  24 
  -1   4 -10 1884.50 389.000   9 
   1   4  10 2107.04 375.173  26 
   1  -4  10 2251.83 326.277  10 
  -1   4 -10 2398.35 370.064  16 
  -1   4 -10 1996.94 322.930  15 
   1   4  10 1973.72 324.909  21 
   1   4  11 1955.52 342.725  24 
   1   4  11 1437.12 288.119  26 
   1  -4  11 1449.61 267.192  10 
   1   4  11 1972.04 325.614  21 
  -1   4 -11 1373.37 308.958   9 
  -1   4 -11 1735.72 306.315  15 
  -1   4 -11 1824.52 330.654  16 
   1   4  11 1522.75 301.702  25 
  -1   4 -12 481.502 166.018  16 
   1   4  12 450.010 164.167  25 
   1   4  12 428.697 154.486  26 
  -1   4 -12 372.678 144.360  15 
   1  -4  12 484.505 165.339  10 
   1   4  12 331.174 139.570  24 
  -1   4 -12 400.880 180.037   9 
   1   4  13 371.726 146.386  25 
   1  -4  13 386.581 145.773  10 
   1   4  13 348.341 132.844  24 
  -1   4 -13 266.520 117.491  15 
  -1   4 -13 341.638 195.917   9 
  -1   4 -13 374.090 139.673  16 
  -1   4 -14 5808.38 569.087  16 
  -1   4 -14 5410.87 652.385   9 
   1  -4  14 5238.62 528.688  10 
  -1   4 -14 4245.24 485.383  15 
  -1   4 -15 21061.9 1332.32   9 
  -1   4 -15 23133.2 1146.66  16 
  -1   4 -15 19460.9 1088.27  15 
   1  -4  15 20560.3 1094.13  10 
  -1   4 -16 6941.76 718.035   9 
  -1   4 -16 7579.81 630.459  15 
   1  -4  16 7434.16 629.468  10 
  -1   4 -17 581.995 211.601   9 
   1  -4  17 524.269 173.831  10 
  -1   4 -17 496.437 136.738  15 
  -1   4 -18 445.040 136.827  22 
  -1   4 -18 449.162 138.299  15 
   1  -4  18 446.907 148.784  10 
  -1   4 -18 266.101 121.387   9 
   1  -4  19 7488.59 582.082  10 
  -1   4 -19 7329.02 542.452  15 
  -1   4 -20 1256.02 198.433  15 
   1  -4  20 1196.90 211.879  10 
   1  -4  21 151.940 85.2198  10 
   1  -4  22 1597.92 224.939  10 
  -1   4 -22 1736.38 203.251  19 
   1   5 -19 121.301 45.0622  15 
   1   5 -19 45.1739 42.5079  19 
  -1  -5  19 78.0987 54.0569  10 
   1   5 -18 423.497 120.115  22 
  -1  -5  18 461.171 125.303  10 
   1   5 -18 503.413 112.271  19 
   1   5 -18 347.257 112.491  11 
   1   5 -18 641.749 149.589  15 
  -1  -5  17 4466.31 409.504  10 
   1   5 -17 4751.21 371.791  19 
   1   5 -17 4043.10 417.386  22 
   1   5 -17 4325.70 412.420  15 
   1   5 -16 4231.28 364.160  19 
  -1  -5  16 4474.23 424.773  10 
   1   5 -16 4099.16 447.212  22 
   1   5 -16 4465.13 438.880  15 
   1   5 -15 94.2879 69.0270  22 
  -1  -5  15 269.374 102.835  10 
   1   5 -15 172.719 79.7810  19 
   1   5 -15 149.897 95.6770  15 
  -1   5  14 1225.28 244.049  26 
  -1   5  14 1297.20 257.804  24 
  -1   5  14 1339.38 254.140  25 
  -1  -5  14 1476.41 258.723  10 
   1   5 -14 1322.10 257.967  15 
   1   5 -14 1289.82 206.639  19 
   1   5 -14 1331.72 265.194  22 
  -1   5  13 1126.27 256.709  25 
   1   5 -13 1963.60 322.194  15 
   1   5 -13 1707.45 239.025  19 
  -1  -5  13 1817.95 289.900  10 
  -1   5  13 1514.19 288.932  26 
  -1   5  13 1756.64 328.210  24 
   1   5 -13 2056.64 341.904  16 
  -1  -5  13 1633.51 235.016  13 
  -1  -5  12 2840.00 360.412  10 
  -1   5  12 1988.00 357.107  24 
  -1  -5  12 2460.15 320.579  13 
  -1   5  12 2731.43 404.152  25 
   1   5 -12 3125.26 433.010  16 
  -1   5  12 2479.85 392.536  26 
   1   5 -12 3223.33 417.334  15 
   1   5 -12 2664.83 298.433  19 
  -1   5  11 36.5027 63.3095  25 
   1   5 -11 170.707 104.170  16 
  -1  -5  11 172.084 81.5212  10 
  -1   5  11 159.558 92.6850  26 
   1   5 -11 79.4232 74.2326  15 
  -1   5  11 88.0549 59.6946  21 
  -1   5  11 131.406 129.585  24 
   1   5 -11 40.8269 44.0439  19 
  -1   5  10 3649.67 484.467  26 
  -1   5  10 4269.29 519.605  21 
   1   5 -10 4293.46 526.390  16 
  -1  -5  10 4049.41 442.579  10 
   1   5 -10 3979.77 490.625  21 
   1   5 -10 3583.51 337.101  19 
  -1   5  10 2914.39 459.257  24 
  -1   5  10 3466.84 498.655  25 
   1   5 -10 3465.65 425.101  15 
  -1   5   9 997.783 274.589  24 
  -1   5   9 835.472 223.602  21 
   1   5  -9 691.086 203.940  21 
   1   5  -9 1125.97 280.360  16 
  -1   5   9 725.073 216.744  26 
  -1  -5   9 842.020 185.621  10 
   1   5  -9 803.805 197.756  15 
  -1   5   9 741.518 215.913  25 
  -1   5   8 5291.08 630.736  25 
  -1   5   8 6269.78 648.524  26 
  -1   5   8 6191.14 661.307  21 
  -1   5   8 5793.29 676.104  24 
   1   5  -8 6092.70 644.854  21 
   1   5  -8 4756.75 504.864  15 
   1   5  -8 6385.22 648.287  16 
  -1  -5   8 5062.25 484.789  10 
  -1   5   7 200.121 131.514  24 
   1   5  -7 273.018 118.728  16 
  -1   5   7 376.007 167.828  26 
   1   5  -7 245.005 116.178  15 
  -1   5   7 166.784 78.2632  21 
   1   5  -7 224.702 117.424  24 
  -1   5   7 335.049 170.616  25 
   1   5  -7 197.585 116.624  25 
  -1  -5   7 173.687 66.8053  10 
   1   5  -7 244.949 154.144  21 
  -1   5   6 7020.15 688.024  26 
   1   5  -6 7469.88 703.419  25 
   1   5  -6 7504.97 712.168  16 
  -1   5   6 7105.82 733.877  25 
  -1   5   6 7018.45 739.491  24 
  -1  -5   6 7173.58 568.695  10 
  -1   5   6 5516.37 668.099  21 
   1   5  -6 6951.42 591.077  15 
   1   5  -6 7006.93 735.399  21 
   1   5  -6 7740.55 712.735  24 
  -1   5   5 987.808 248.397  21 
  -1   5   5 1094.47 269.313  26 
  -1  -5   5 885.712 177.927  10 
   1   5  -5 843.812 248.226  24 
   1   5  -5 728.415 258.253  21 
  -1   5   5 1056.78 274.727  24 
   1   5  -5 850.340 206.378  15 
  -1   5   5 815.419 211.851  16 
  -1   5   5 618.649 240.016  25 
   1   5  -5 1008.66 235.770  16 
   1   5  -5 1113.29 263.798  25 
  -1   5   4 1342.35 313.510  25 
  -1   5   4 1980.36 356.280  26 
   1   5  -4 1366.86 306.381  21 
  -1   5   4 1749.03 323.459  14 
  -1   5   4 1257.06 260.421  16 
   1   5  -4 1702.08 273.447  15 
  -1  -5   4 1603.93 252.123  10 
   1   5  -4 1493.94 322.687  24 
  -1   5   4 1605.48 347.513  24 
   1   5  -4 1810.27 328.045  16 
  -1   5   4 1411.67 337.043  21 
   1   5  -4 2005.16 372.579  25 
  -1   5   3 11643.9 1000.38  21 
  -1   5   3 9048.60 732.363  16 
   1   5  -3 11661.9 873.247  16 
  -1   5   3 12005.3 947.446  25 
  -1   5   3 11169.7 932.352  24 
   1   5  -3 10481.4 928.363  21 
   1   5  -3 12104.2 926.971  24 
  -1   5   3 10211.9 791.688  14 
   1   5  -3 11333.6 728.957  15 
   1   5  -3 11840.2 924.273  25 
  -1  -5   3 11702.8 723.017  10 
   1   5  -2 1566.45 314.594  16 
  -1   5   2 1636.91 373.148  21 
   1   5  -2 1543.62 323.213  21 
  -1   5   2 1493.41 332.417  25 
   1   5  -2 1612.81 344.878  24 
   1   5  -2 1842.10 281.949  15 
  -1   5   2 1692.32 313.388  16 
  -1  -5   2 1699.82 259.864  10 
  -1   5   2 1423.45 318.822  24 
   1   5  -2 2041.31 382.843  25 
  -1   5   2 1877.40 332.463  14 
   1   5  -1 9274.86 761.259  16 
  -1   5   1 10762.3 934.983  21 
   1   5  -1 10707.0 950.268  21 
   1   5  -1 10520.7 877.940  24 
  -1   5   1 10003.0 872.966  24 
  -1   5   1 9119.12 753.003  14 
   1   5  -1 10611.4 871.044  25 
  -1   5   1 10947.4 906.355  25 
  -1   5   1 11574.0 849.520  16 
   1   5  -1 12304.7 721.399  15 
  -1   5   0 3195.13 486.186  24 
  -1   5   0 2843.66 410.725  14 
   1   5   0 2617.49 314.016  15 
   1   5   0 3439.77 483.675  25 
  -1   5   0 3064.86 334.979  15 
   1   5   0 3378.56 484.363  24 
   1   5   0 3078.09 421.820  16 
   1   5   0 3063.12 477.427  21 
  -1   5   0 3212.92 494.691  21 
  -1   5   0 3050.90 461.238  25 
  -1   5   0 3099.15 446.308  16 
   1   5   1 7883.43 665.334  22 
  -1   5  -1 8590.81 720.790  14 
  -1   5  -1 7795.26 746.353  25 
   1   5   1 8998.79 829.139  21 
  -1   5  -1 8690.76 743.548  16 
   1   5   1 7701.81 666.831  16 
  -1   5  -1 7229.61 736.994  24 
  -1   5  -1 7818.49 801.190  21 
  -1   5  -1 8463.97 596.787  15 
   1   5   1 7949.41 756.250  25 
   1   5   1 6848.88 515.423  15 
   1   5   1 7800.99 756.097  24 
   1   5   2 354.159 187.358  21 
   1   5   2 276.118 160.357  24 
  -1   5  -2 452.340 183.106  21 
   1   5   2 236.429 107.769  22 
  -1   5  -2 274.384 94.1945  24 
   1   5   2 298.570 124.937  25 
  -1   5  -2 416.462 191.675  25 
   1   5   2 254.979 131.965  16 
  -1   5  -2 342.251 124.395  15 
  -1   5  -2 110.680 38.0827  14 
  -1   5  -2 213.215 138.805  16 
   1   5   3 1751.10 362.079  24 
   1   5   3 1555.75 280.875  22 
   1  -5   3 1750.90 289.917  10 
  -1   5  -3 2158.29 307.749  15 
  -1   5  -3 1883.44 361.481  16 
  -1   5  -3 2074.51 369.770  25 
  -1   5  -3 1844.61 361.568  21 
   1   5   3 1581.12 314.503  25 
  -1   5  -3 1948.24 368.427  24 
   1   5   3 1682.48 281.414  16 
  -1   5  -3 1710.46 315.706  14 
   1   5   3 1576.18 321.268  21 
   1   5   4 2014.55 299.012  16 
   1   5   4 1631.95 356.668  24 
  -1   5  -4 1874.02 354.636  24 
  -1   5  -4 2239.13 375.384  25 
   1   5   4 1891.45 377.562  25 
  -1   5  -4 2027.63 392.318  21 
   1  -5   4 1769.90 274.451  10 
   1   5   4 1947.01 367.796  21 
  -1   5  -4 1609.95 269.378  15 
  -1   5  -4 1774.03 317.540  14 
  -1   5  -4 1950.42 361.697  16 
  -1   5  -5 1293.45 245.295  15 
  -1   5  -5 1125.19 253.801  14 
  -1   5  -5 1315.10 288.383  24 
  -1   5  -5 1164.68 307.527  21 
  -1   5  -5 1389.98 301.350  16 
   1  -5   5 1348.32 244.510  10 
   1   5   5 1321.49 313.138  21 
  -1   5  -5 1176.64 271.371  25 
   1   5   5 1268.95 301.790  24 
   1   5   5 1252.56 300.683  25 
   1   5   6 1328.31 314.494  21 
  -1   5  -6 1471.05 363.874  21 
   1   5   6 1479.11 324.289  25 
  -1   5  -6 1561.29 303.587  24 
  -1   5  -6 1283.21 242.861  15 
  -1   5  -6 1580.17 314.804  25 
   1  -5   6 1456.04 264.014  10 
  -1   5  -6 1351.08 297.292  16 
   1   5   6 1399.52 337.866  24 
   1   5   7 2801.25 400.204  26 
  -1   5  -7 2710.85 376.109  15 
  -1   5  -7 2813.87 440.353  16 
  -1   5  -7 3385.13 454.692  25 
   1   5   7 2515.22 427.515  25 
   1   5   7 2937.55 439.206  21 
   1   5   7 2626.99 437.173  24 
   1  -5   7 2649.66 350.367  10 
  -1   5  -7 1979.67 388.739  21 
  -1   5  -7 3019.32 427.290  24 
   1   5   8 3304.54 485.409  24 
  -1   5  -8 2628.09 410.129  24 
  -1   5  -8 2772.75 436.247  16 
   1   5   8 2490.92 410.530  25 
  -1   5  -8 3014.38 399.610  15 
   1   5   8 2719.77 387.734  26 
  -1   5  -8 3095.35 431.437  25 
   1  -5   8 2733.35 372.168  10 
  -1   5  -8 2368.89 410.349  21 
   1   5   8 2494.29 408.219  21 
   1   5   9 2412.11 408.785  21 
  -1   5  -9 1898.52 322.141  15 
   1  -5   9 1938.90 294.531  10 
   1   5   9 1481.44 322.390  24 
  -1   5  -9 2237.63 391.113  16 
  -1   5  -9 1627.48 330.955  21 
   1   5   9 2126.93 389.466  25 
  -1   5 -10 7524.81 703.420  21 
  -1   5 -10 6978.36 616.834  15 
   1   5  10 7040.08 680.158  25 
  -1   5 -10 7771.45 714.903  16 
   1   5  10 6651.05 686.835  24 
   1  -5  10 7259.94 607.223  10 
   1   5  10 8505.15 729.360  21 
  -1   5 -11 803.812 210.728  15 
   1   5  11 940.572 226.394  21 
   1  -5  11 534.871 149.894  10 
  -1   5 -11 886.138 237.139  16 
   1   5  11 961.908 222.438  25 
  -1   5 -11 607.956 137.772  19 
   1   5  11 725.574 201.548  24 
   1   5  12 1384.32 274.538  25 
   1   5  12 1264.44 259.168  24 
  -1   5 -12 948.329 169.387  19 
   1  -5  12 1504.87 263.901  10 
   1   5  12 1426.74 265.836  21 
  -1   5 -12 1292.35 275.453  15 
  -1   5 -12 1284.75 277.585  16 
  -1   5 -13 215.714 85.8108  19 
   1   5  13 290.690 125.127  24 
  -1   5 -13 238.418 102.219  15 
   1   5  13 243.769 123.537  25 
   1  -5  13 306.319 115.001  10 
  -1   5 -13 350.602 133.874  16 
   1  -5  14 3101.75 365.413  10 
  -1   5 -14 2600.62 288.638  19 
  -1   5 -14 2996.98 394.664  16 
  -1   5 -14 2530.93 338.565  15 
   1  -5  15 4045.91 421.232  10 
  -1   5 -15 3953.68 350.657  19 
  -1   5 -15 3744.85 411.822  15 
  -1   5 -16 1372.63 260.625  22 
   1  -5  16 1259.95 228.243  10 
  -1   5 -16 1273.44 186.719  19 
  -1   5 -16 1188.28 221.851  15 
  -1   5 -17 82.4534 57.0628  22 
  -1   5 -17 18.4626 62.6075  15 
  -1   5 -17 21.2857 41.7535  19 
   1  -5  17-8.86573 23.5011  10 
  -1   5 -18 192.306 73.4781  15 
  -1   5 -18 125.520 70.3159  22 
  -1   5 -18 139.447 58.6448  19 
   1  -5  18 231.960 79.0476  10 
   1  -5  19 114.829 46.3647  10 
  -1   5 -19 77.2771 40.1373  15 
   1   6 -16 63.7659 41.0428  15 
   1   6 -15 1484.74 225.111  11 
   1   6 -15 2015.99 242.871  15 
   1   6 -15 1757.47 241.101  22 
  -1  -6  14 454.799 104.001  10 
   1   6 -14 364.533 123.788  11 
   1   6 -14 827.609 165.109  15 
   1   6 -14 564.123 136.558  22 
   1   6 -13 358.843 130.543  22 
  -1   6  13 128.575 70.3071  25 
   1   6 -13 264.442 93.4875  15 
  -1  -6  13 280.212 87.4040  10 
  -1   6  13 184.760 63.6236  24 
  -1   6  12 358.730 123.946  25 
  -1   6  12 345.709 133.136  24 
   1   6 -12 339.908 118.492  22 
  -1  -6  12 308.522 94.4731  10 
   1   6 -12 492.861 142.498  15 
  -1   6  11 1135.62 235.124  25 
   1   6 -11 1473.21 249.154  15 
  -1  -6  11 916.797 165.559  13 
  -1   6  11 1204.57 256.277  24 
  -1  -6  11 1349.79 203.414  10 
   1   6 -11 1250.38 260.752  22 
   1   6 -10 810.520 192.740  16 
  -1   6  10 623.019 182.573  24 
  -1  -6  10 368.530 113.053  13 
   1   6 -10 445.226 139.485  22 
  -1   6  10 586.573 183.909  25 
   1   6 -10 560.146 157.987  15 
  -1   6  10 566.050 148.635  21 
  -1  -6  10 627.353 145.833  10 
   1   6  -9 1407.77 280.491  21 
  -1   6   9 1499.43 285.705  21 
  -1   6   9 1379.20 276.603  24 
  -1  -6   9 1433.30 216.684  10 
   1   6  -9 1248.35 270.136  22 
   1   6  -9 1842.63 304.972  16 
   1   6  -9 1269.03 235.754  15 
  -1   6   9 1492.31 290.384  25 
  -1   6   8 4769.30 548.641  25 
  -1   6   8 4559.45 520.768  21 
   1   6  -8 5352.39 564.287  21 
   1   6  -8 4539.88 518.770  22 
  -1  -6   8 5259.59 437.986  10 
   1   6  -8 3895.98 417.985  15 
  -1   6   8 4899.79 556.623  24 
   1   6  -8 5410.66 563.705  16 
   1   6  -7 13718.2 920.130  16 
   1   6  -7 8619.69 757.165  22 
  -1   6   7 10678.2 873.500  25 
   1   6  -7 12034.4 899.028  21 
  -1   6   7 13369.1 930.004  21 
   1   6  -7 12321.2 757.015  15 
  -1  -6   7 11999.7 688.852  10 
  -1   6   7 10849.5 874.061  24 
   1   6  -6 1772.29 279.274  15 
  -1   6   6 1560.04 333.615  25 
   1   6  -6 1094.22 253.076  22 
   1   6  -6 1658.26 310.390  16 
   1   6  -6 1417.90 307.194  21 
  -1  -6   6 1312.68 209.513  10 
  -1   6   6 1277.39 307.913  21 
  -1   6   6 1424.60 294.743  24 
  -1   6   5 11163.0 919.988  21 
  -1   6   5 9925.17 853.712  24 
   1   6  -5 10886.3 820.905  16 
   1   6  -5 10841.2 846.039  24 
  -1   6   5 9899.51 835.514  25 
   1   6  -5 10368.4 686.517  15 
   1   6  -5 9779.95 846.211  21 
   1   6  -5 9400.32 770.412  22 
   1   6  -5 10433.2 824.732  25 
  -1  -6   5 9396.53 609.099  10 
   1   6  -4 6502.68 674.427  24 
  -1   6   4 5892.02 640.786  25 
   1   6  -4 4884.13 459.637  15 
   1   6  -4 6065.76 607.774  16 
  -1   6   4 5491.83 521.375  16 
  -1   6   4 5384.70 654.964  21 
   1   6  -4 4693.41 538.464  22 
  -1  -6   4 5285.97 439.944  10 
   1   6  -4 7093.28 686.341  25 
   1   6  -4 6147.95 668.661  21 
  -1   6   4 5682.21 644.584  24 
   1   6  -3 10617.4 801.513  16 
   1   6  -3 11076.8 913.382  21 
   1   6  -3 10326.9 862.462  24 
   1   6  -3 8253.65 719.359  22 
  -1   6   3 10465.6 870.485  24 
   1   6  -3 9137.93 632.390  15 
   1   6  -3 11607.7 887.665  25 
  -1   6   3 11149.8 766.947  16 
  -1   6   3 10055.6 848.444  25 
  -1   6   3 8349.14 798.897  21 
   1   6  -2 163.983 107.867  22 
  -1   6   2 192.846 131.183  25 
  -1   6   2 159.555 114.004  24 
   1   6  -2 153.638 104.635  21 
   1   6  -2 131.088 66.7307  15 
  -1   6   2 96.6214 81.2166  16 
   1   6  -2 73.6699 101.753  25 
   1   6  -2 211.350 153.332  24 
  -1   6   2 218.123 150.380  21 
   1   6  -2 101.226 117.771  16 
  -1   6   1 1423.51 317.644  25 
  -1   6   1 1079.94 274.457  24 
   1   6  -1 1374.63 289.757  25 
  -1   6   1 797.886 248.762  21 
   1  -6  -1 479.722 193.530  10 
   1   6  -1 1273.33 270.466  16 
  -1   6   1 839.778 195.781  22 
  -1   6   1 1506.34 283.717  16 
   1   6  -1 1165.87 302.354  21 
   1   6  -1 1219.46 298.904  24 
   1   6  -1 1166.41 258.893  22 
  -1   6   0 941.163 230.583  22 
  -1   6   0 1186.14 283.339  24 
  -1   6   0 1603.76 305.621  16 
   1   6   0 1013.65 216.403  22 
  -1   6   0 1487.75 338.603  21 
   1  -6   0 900.438 213.289  10 
   1   6   0 1603.66 334.851  25 
   1   6   0 1265.14 259.433  16 
   1   6   0 1415.35 310.043  24 
   1   6   0 1264.58 322.065  21 
  -1   6   0 1379.55 295.384  25 
  -1   6  -1 3234.87 465.717  25 
  -1   6  -1 2644.87 466.615  21 
   1   6   1 1854.86 293.314  11 
  -1   6  -1 2819.76 442.187  24 
  -1   6  -1 2671.94 392.323  16 
   1   6   1 2699.91 364.771  16 
   1  -6   1 2049.40 299.991  10 
   1   6   1 2775.74 461.657  24 
   1   6   1 2296.10 437.217  21 
  -1   6  -1 1593.47 307.051  22 
   1   6   1 2545.31 420.100  25 
   1   6   1 2305.64 325.529  22 
   1   6   2 2660.10 449.153  21 
   1   6   2 1793.01 357.379  24 
  -1   6  -2 1821.27 265.562  15 
   1   6   2 2309.60 329.239  16 
  -1   6  -2 2710.92 463.954  21 
  -1   6  -2 2342.39 412.452  24 
   1   6   2 2565.01 410.320  25 
  -1   6  -2 1946.19 339.749  22 
  -1   6  -2 2633.63 393.205  16 
   1  -6   2 2404.88 314.731  10 
  -1   6  -2 2893.83 443.499  25 
   1   6   3 2749.57 464.452  21 
   1   6   3 3701.95 402.272  16 
  -1   6  -3 3464.19 520.068  21 
  -1   6  -3 3724.41 380.500  15 
  -1   6  -3 3548.02 468.633  25 
   1   6   3 3153.01 471.154  24 
  -1   6  -3 3775.23 487.785  16 
   1   6   3 3300.85 474.077  25 
   1  -6   3 2586.63 336.792  10 
  -1   6  -3 3080.97 469.370  24 
  -1   6  -4 2083.30 362.430  24 
   1   6   4 2319.65 393.016  24 
   1   6   4 1570.77 325.968  25 
   1   6   4 2067.42 386.108  21 
  -1   6  -4 1929.24 346.283  16 
  -1   6  -4 1695.43 367.798  21 
  -1   6  -4 2336.07 381.487  25 
  -1   6  -4 2018.20 285.194  15 
   1  -6   4 1790.31 272.897  10 
  -1   6  -5 3687.04 514.043  21 
   1   6   5 3849.58 517.396  24 
   1   6   5 3624.74 493.636  25 
  -1   6  -5 3993.33 404.565  15 
   1   6   5 4155.59 532.080  21 
   1  -6   5 3797.83 398.144  10 
  -1   6  -5 4148.93 521.102  25 
  -1   6  -5 3788.88 488.944  16 
  -1   6  -5 4194.66 515.230  24 
   1   6   6 2508.32 403.192  21 
  -1   6  -6 2691.08 341.498  15 
   1   6   6 2560.33 412.239  25 
   1   6   6 2506.15 409.790  24 
   1  -6   6 2416.60 311.204  10 
  -1   6  -6 2559.82 415.248  21 
  -1   6  -6 3143.77 430.949  24 
  -1   6  -6 3384.67 452.819  16 
  -1   6  -6 2891.83 428.011  25 
  -1   6  -7 1434.07 258.989  15 
  -1   6  -7 1543.46 301.123  16 
   1   6   7 1113.51 267.535  25 
   1   6   7 1727.96 336.929  24 
  -1   6  -7 1547.33 321.353  21 
   1  -6   7 1541.03 249.655  10 
   1   6   7 1519.44 303.525  21 
  -1   6  -8 494.487 172.866  21 
  -1   6  -8 419.237 153.209  16 
  -1   6  -8 429.916 126.696  15 
   1   6   8 694.778 202.924  25 
   1  -6   8 444.785 140.925  10 
   1   6   8 404.597 159.524  21 
   1   6   8 548.551 171.887  24 
  -1   6  -9 3218.68 378.895  15 
   1   6   9 2942.54 409.386  25 
  -1   6  -9 2949.68 400.861  21 
   1  -6   9 3034.81 337.117  10 
   1   6   9 2950.91 399.848  24 
  -1   6  -9 3400.14 432.762  16 
   1   6   9 2796.11 389.358  21 
   1  -6  10 1369.25 217.649  10 
   1   6  10 1564.24 266.363  21 
   1   6  10 828.750 235.950  24 
  -1   6 -10 1589.44 286.702  16 
  -1   6 -10 794.463 204.560  22 
  -1   6 -10 1314.69 222.869  15 
   1   6  10 1376.86 273.320  25 
  -1   6 -11 3801.99 430.844  16 
  -1   6 -11 3239.31 415.990  22 
   1   6  11 2068.28 333.055  25 
   1   6  11 2508.91 396.898  24 
  -1   6 -11 4029.49 401.661  15 
   1   6  11 2942.68 339.008  21 
   1  -6  11 3231.94 341.205  10 
   1   6  12 303.188 115.151  25 
   1  -6  12 261.042 89.2994  10 
   1   6  12 378.921 116.772  24 
  -1   6 -12 426.700 152.174  22 
  -1   6 -12 591.744 149.596  15 
   1  -6  13 19.7889 40.2918  10 
  -1   6 -13 17.1654 73.9771  15 
  -1   6 -13-24.7618 31.9685  22 
   1  -6  14 10.2906 27.9984  10 
  -1   6 -14 32.8069 37.7270  15 
  -1   6 -14 64.6181 51.7387  22 
  -1   6 -15 192.503 70.5485  15 
  -1   6 -15 113.755 57.1757  22 
  -1   7   8 775.935 156.192  24 
  -1   7   8 445.188 125.441  25 
   1   7  -8 474.148 124.642  11 
   1   7  -8 513.704 129.057  22 
   1   7  -7 1076.83 207.829  22 
  -1   7   7 1369.75 233.891  24 
  -1   7   7 1726.81 236.298  21 
   1   7  -7 819.307 186.470  11 
  -1   7   7 1524.13 236.971  25 
   1   7  -6 1153.71 218.213  22 
   1   7  -6 1801.18 247.492  21 
  -1   7   6 1804.55 266.971  24 
  -1   7   6 1947.27 271.574  21 
  -1  -7   6 534.511 130.162  13 
   1   7  -6 935.170 199.660  11 
  -1   7   6 1502.16 256.226  25 
  -1   7   5 273.402 96.6905  25 
  -1   7   5 295.165 113.079  21 
   1   7  -5 209.789 95.7012  11 
   1   7  -5 267.855 110.833  22 
   1   7  -5 326.645 107.531  21 
  -1   7   5 286.392 96.7556  24 
  -1   7   4 1670.30 258.773  24 
   1   7  -4 1756.41 274.206  21 
  -1   7   4 1740.50 269.453  21 
  -1   7   4 886.048 191.825  25 
   1   7  -4 651.938 166.598  11 
   1   7  -4 1056.37 205.427  22 
   1   7  -3 2720.57 345.371  21 
  -1   7   3 3064.02 349.802  25 
   1   7  -3 1260.29 221.440  11 
  -1   7   3 2300.45 326.498  21 
  -1   7   3 2510.19 319.886  24 
   1   7  -3 1010.56 199.715  22 
  -1   7   2 3540.31 409.812  21 
   1   7  -2 4279.36 454.050  21 
  -1   7   2 3833.83 403.065  25 
  -1   7   2 3762.86 403.144  24 
  -1   7   1 1274.10 261.140  21 
   1   7  -1 1694.72 282.658  21 
  -1   7   1 1735.30 263.263  24 
  -1   7   1 1289.51 221.053  25 
  -1   7   0 2287.20 308.211  25 
  -1   7   0 1646.36 291.646  21 
  -1   7   0 1863.29 240.603  16 
  -1   7   0 2179.29 304.613  24 
   1   7   0 1919.63 301.623  21 
  -1   7  -1 1960.14 287.124  24 
  -1   7  -1 1864.81 256.009  16 
  -1   7  -1 2037.27 290.462  25 
   1   7   1 1641.23 279.823  21 
  -1   7  -1 1992.81 310.330  21 
   1   7   2 2359.79 316.761  24 
   1   7   2 2614.56 332.112  25 
  -1   7  -2 2414.73 292.355  16 
  -1   7  -2 2526.91 343.669  21 
   1   7   2 1995.64 312.541  21 
   1   7   3 1022.93 207.980  24 
  -1   7  -3 260.211 99.5002  11 
   1   7   3 827.568 186.597  21 
  -1   7  -3 357.015 107.993  22 
  -1   7  -3 934.205 184.561  16 
   1   7   3 1064.36 214.892  25 
  -1   7  -3 740.539 194.087  21 
   1   7   4 449.512 135.857  21 
  -1   7  -4 225.092 93.7573  22 
   1   7   4 496.426 160.201  25 
  -1   7  -4 111.470 61.5514  11 
  -1   7  -4 717.589 148.306  16 
   1   7   4 819.820 187.284  24 
  -1   7  -4 591.689 152.286  21 
  -1   7  -5 1652.54 244.558  16 
  -1   7  -5 1601.28 252.814  21 
   1   7   5 1557.27 255.121  24 
   1   7   5 1291.88 244.945  25 
   1   7   5 1724.31 264.035  21 
  -1   7  -5 523.618 142.440  22 
  -1   7  -5 665.034 162.805  11 
  -1   7  -6 322.634 124.735  22 
  -1   7  -6 893.025 178.477  21 
   1   7   6 843.162 177.922  21 
   1   7   6 993.049 195.962  25 
  -1   7  -6 324.925 106.800  11 
   1   7   6 815.197 186.508  24 
   1   7   7 395.331 116.488  21 
  -1   7  -7 109.154 75.7634  22 
   1   7   7 322.100 121.006  24 
  -1   7  -7 94.3135 80.0681  11 
   1   7   7 455.284 123.889  25 
  -2   0  27 56.3153 48.1843  20 
  -2   0  26 477.415 121.090  20 
  -2   0  26 439.923 109.053   8 
  -2   0  26 356.697 142.666  26 
  -2   0  25 5.56163 23.0098  10 
  -2   0  25-82.2873 126.082  26 
  -2   0  25 5.49090 47.1418  20 
  -2   0  24 12550.4 827.806  10 
  -2   0  24 11062.4 930.083  26 
  -2   0  24 12519.3 839.246  20 
  -2   0  23 16.1183 67.2269  20 
  -2   0  23-24.1796 73.6135  26 
  -2   0  23 63.2119 35.3043  10 
  -2   0  22 4004.73 497.527  20 
  -2   0  22 3940.65 484.818  10 
  -2   0  21 7.15376 92.2793  10 
  -2   0  21-27.5983 23.4298  20 
  -2   0  20 20923.3 1159.62  10 
  -2   0  20 18179.9 1129.47  20 
  -2   0  19 12.4047 59.5296  10 
  -2   0  19 156.431 91.9952  20 
  -2   0  19-19.8021 45.9634  18 
  -2   0  18 202.153 76.3371  20 
  -2   0  18 272.743 137.505  10 
  -2   0  18 110.120 88.3452  18 
  -2   0  17 21.8717 28.4408  20 
  -2   0  17 70.5295 90.1029  10 
  -2   0  17-30.0228 49.8474  18 
  -2   0  16 5511.78 1319.16   3 
  -2   0  16 5945.61 517.176  18 
  -2   0  16 6309.74 549.484  10 
  -2   0  16 6044.81 1376.43   2 
  -2   0  15 17.6305 150.732   3 
  -2   0  15 6.61642 39.2979  10 
  -2   0  15 63.3201 180.880   2 
  -2   0  15 79.9424 90.4729  18 
  -2   0  14 1447.97 646.126   2 
  -2   0  14 1869.55 268.108  10 
  -2   0  14 1383.59 616.707   3 
   2   0 -14 1683.91 402.612   1 
  -2   0  14 1799.31 245.297  18 
   2   0 -13 58.5015 91.3497   1 
  -2   0  13 31.3506 38.3556  18 
  -2   0  13 6.09441 10.6370  10 
  -2   0  13 41.2850 82.2346   2 
  -2   0  13 9.26855 113.359   3 
  -2   0  12 13953.6 1696.85   2 
  -2   0  12 15809.9 1796.11   3 
  -2   0  12 14907.2 722.530  10 
   2   0 -12 12718.9 1036.68   1 
  -2   0  12 15970.6 715.068  18 
  -2   0  11 227.006 272.334   3 
   2   0 -11-75.2028 90.4361   1 
  -2   0  11 43.1819 43.8895   2 
  -2   0  10 108199. 4567.45   3 
   2   0 -10 104375. 3279.14   1 
  -2   0   9 74.7315 96.5653   2 
  -2   0   9 77.0671 62.6456   3 
   2   0  -9-27.4242 70.1852   1 
   2   0  -8 22971.0 1140.48   1 
   2   0  -8 15955.1 946.290   1 
   2   0  -7 33.0073 61.0549   1 
   2   0  -7 4.96891 19.3266   1 
   2   0  -6 6395.99 524.603   1 
   2   0  -6 7839.97 545.360   1 
   2   0  -5 44.5996 39.2898   1 
   2   0  -5 21.5661 39.8138   1 
   2   0  -4 272477. 5896.09   1 
   2   0  -4 289002. 6014.07   1 
   2   0  -3-25.0615 43.1890   1 
  -2   0   3-40.1305 78.7125   3 
  -2   0   3 101.352 94.3907   2 
  -2   0   3-14.0100 33.1481   1 
   2   0  -2 242260. 4963.79   1 
  -2   0   2 224120. 5219.32   3 
  -2   0   2 233032. 4975.75   1 
  -2   0   2 232635. 5240.61   2 
   2   0  -1 56.7967 44.4551   3 
  -2   0   1 4.53196 17.9748   1 
  -2   0   1 49.4772 34.8778   3 
   2   0  -1 24.1271 21.8979   1 
  -2   0   1 12.9653 31.7870   2 
  -2   0   1 92.2450 55.9013   5 
   2   0  -1 21.2696 17.5190   5 
   2   0  -1 44.1738 32.3078   2 
   2   0   0 2084.53 231.592   5 
  -2   0   0 1977.78 240.324   5 
  -2   0   0 1758.14 187.149   1 
   2   0   0 1720.62 175.088   1 
  -2   0  -1 1.58502 8.64516   1 
  -2   0  -1 36.3626 14.6353   4 
  -2   0  -1-3.73234 24.4681   5 
   2   0   1 3.75335 21.5311   1 
   2   0   1 53.1834 32.9265   4 
   2   0   2 81302.1 2172.45   4 
   2   0   2 80978.7 2067.00   1 
  -2   0  -3 46.2347 41.3623   1 
   2   0   3 11.7641 22.2019   4 
  -2   0  -3 9.68825 31.2635   4 
   2   0   3 58.9506 30.2192   1 
   2   0   4 33930.6 1280.13   4 
  -2   0  -4 33760.0 1298.92   4 
  -2   0  -4 31844.0 1123.84   1 
   2   0   4 32197.5 1100.25   1 
   2   0   5 34.7974 9.15041   1 
  -2   0  -5 38.5139 46.9480   4 
   2   0   5 96.2483 63.2372   4 
  -2   0  -5-17.0454 29.2020   1 
   2   0   6 18137.5 853.406   1 
  -2   0  -6 18895.0 1067.28   4 
   2   0   6 17492.5 1015.30   4 
  -2   0  -6 17781.0 884.406   1 
   2   0   7 70.4536 36.2220   1 
  -2   0  -7-23.5024 28.4498   1 
   2   0   8 2052.15 297.419   1 
  -2   0  -8 2306.22 344.489   1 
   2   0   9 75.5273 66.1356   1 
   2   0  10 8217.08 668.952   1 
   2   0  11 70.8448 71.0985  12 
   2   0  11 39.4134 51.2982  18 
   2   0  11 90.7690 32.4468   1 
   2   0  12 3717.90 806.842   3 
   2   0  12 4137.54 350.085  10 
   2   0  12 4883.13 403.030  18 
   2   0  12 4400.44 369.311  12 
   2   0  12 4345.14 538.589   1 
   2   0  12 3939.26 341.647  23 
   2   0  12 3724.01 838.248   2 
   2   0  12 4541.88 415.267  27 
   2   0  13-68.0270 176.940   3 
   2   0  13-30.7125 24.6829   1 
   2   0  13-38.5740 57.1842  27 
   2   0  13 3.40533 31.3449  12 
   2   0  13-212.309 325.542   2 
   2   0  13 25.7092 36.7738  23 
   2   0  13 7.24385 32.7542  18 
   2   0  13-35.7173 33.8815  10 
   2   0  14 3277.63 330.826  23 
   2   0  14 3303.99 834.649   2 
   2   0  14 3030.84 338.866  12 
   2   0  14 3030.45 329.705  10 
   2   0  14 3264.60 391.667  27 
   2   0  14 3381.36 886.246   3 
   2   0  14 3339.09 361.177  18 
   2   0  15-80.7850 71.7315  27 
   2   0  15 288.977 351.504   3 
   2   0  15 90.7859 179.737   2 
   2   0  15 61.3264 67.3837  18 
   2   0  15-13.5230 61.6366  10 
   2   0  15 19.6883 10.9619  12 
   2   0  16 7058.27 1436.56   2 
   2   0  16 8088.93 617.378  12 
   2   0  16 7695.49 680.347  27 
   2   0  16 8492.31 638.320  18 
   2   0  16 6822.61 1415.99   3 
   2   0  16 8696.78 620.246  10 
   2   0  17 123.114 94.4261  10 
   2   0  17-14.0950 64.3002  27 
   2   0  17 155.688 100.522  18 
   2   0  18 380.765 135.180  10 
   2   0  18 380.736 136.651  18 
   2   0  19 34.3176 72.8843  10 
  -2   0 -19 28.4821 48.9828   9 
   2   0  19-34.8931 24.7558  18 
   2   0  20 4571.65 487.337  18 
   2   0  20 4719.95 494.953  10 
   2   0  21 40.2422 56.1928  18 
   2   0  21-11.5948 39.6489  10 
   2   0  22 667.291 216.428  26 
   2   0  22 646.260 189.818  20 
   2   0  22 899.256 206.796  18 
   2   0  22 720.558 181.111  10 
   2   0  23 42.2556 26.6419  26 
   2   0  23 25.8866 46.5419  20 
   2   0  23-30.9686 50.2515  10 
   2   0  23-3.58027 27.2037  18 
   2   0  24 11174.8 764.985  20 
   2   0  24 10806.4 691.275  10 
   2   0  25-4.26386 11.8750  20 
   2   0  26 3747.34 358.739  20 
  -2   1  27 178.572 73.3330  20 
  -2  -1  26 1650.37 334.559  26 
  -2  -1  26 2262.42 264.291  20 
  -2   1  26 2032.52 309.919  26 
  -2  -1  26 2456.53 303.653  10 
  -2   1  26 2546.05 307.181  20 
  -2  -1  25 1240.29 212.558  20 
  -2  -1  25 918.255 199.964  10 
  -2   1  25 1174.02 252.692  26 
  -2   1  25 1302.43 238.738  20 
   2   1 -25 1351.22 180.851  19 
  -2  -1  25 1119.55 274.295  26 
   2   1 -24 896.880 160.345  19 
  -2  -1  24 944.088 218.565  10 
  -2  -1  24 849.440 193.290  20 
  -2   1  24 628.023 210.284  26 
  -2   1  24 987.443 213.468  20 
  -2  -1  23 429.765 144.430  20 
  -2   1  23 355.506 183.802  26 
  -2   1  23 441.366 156.325  20 
  -2  -1  23 347.637 160.375  10 
  -2   1  22 213.949 159.334  26 
  -2   1  22 107.321 80.6009  20 
  -2  -1  22 29.8561 47.9109  10 
  -2  -1  22 81.3882 28.7852  20 
  -2  -1  21 1643.88 306.644  10 
  -2   1  21 1246.27 272.087  10 
  -2   1  21 1578.25 347.631  26 
  -2  -1  21 1591.92 315.119  20 
  -2   1  21 1538.86 301.801  20 
  -2  -1  20 270.097 115.861  10 
  -2  -1  20 162.250 88.2517  20 
  -2   1  20 172.630 121.368  26 
  -2   1  20 313.126 105.823  20 
  -2   1  20 318.526 147.417  18 
  -2   1  20 158.686 94.6644  10 
  -2  -1  19 38.8292 50.2934  10 
  -2   1  19 4.85663 27.4888  18 
  -2   1  19-18.6273 25.6819  10 
  -2   1  19 80.8034 26.7361  20 
  -2   1  19 75.6499 106.214  26 
  -2  -1  19 129.669 55.9107  20 
  -2   1  18 7127.33 601.001  18 
  -2   1  18 6499.34 620.165  10 
  -2  -1  18 7837.66 632.405  10 
  -2  -1  18 6158.69 611.519  20 
  -2   1  18 6663.80 741.739  26 
  -2   1  18 6932.99 660.862  20 
  -2   1  17 1145.11 247.288  10 
  -2   1  17 1246.39 266.973  20 
  -2  -1  17 1246.94 234.201  18 
  -2   1  17 1320.76 241.513  18 
  -2  -1  17 1188.25 245.134  10 
  -2   1  16 396.066 141.017  20 
  -2  -1  16 307.814 113.908  10 
  -2   1  16 1140.41 718.066   3 
  -2   1  16 603.209 469.650   2 
  -2   1  16 264.554 105.289  18 
  -2  -1  16 303.656 116.047  18 
  -2   1  16 403.213 155.138  10 
   2   1 -16 315.143 253.813   1 
  -2   1  15 5252.25 454.435  18 
  -2   1  15 4483.47 464.711  10 
  -2  -1  15 5472.67 461.885  18 
  -2  -1  15 5751.80 491.394  10 
  -2   1  15 4550.25 1202.29   2 
   2   1 -15 4326.70 778.932   1 
  -2   1  15 3759.91 1160.86   3 
  -2   1  15 2714.32 371.214  20 
  -2  -1  14 2064.03 277.506  10 
  -2   1  14 1671.03 693.501   3 
   2   1 -14 2202.15 540.629   1 
  -2   1  14 1825.46 279.761  10 
  -2  -1  14 2010.71 270.106  18 
  -2   1  14 2093.23 305.470  20 
  -2   1  14 1330.35 643.925   2 
  -2   1  14 2117.73 269.902  18 
   2   1 -14 2317.83 302.020   9 
  -2   1  13 14597.5 1966.73   2 
  -2   1  13 15474.4 825.979  10 
  -2   1  13 16553.9 2118.13   3 
   2   1 -13 16596.6 825.325   9 
  -2   1  13 13259.3 792.753  20 
  -2  -1  13 18243.3 809.067  18 
  -2  -1  13 17205.5 811.710  10 
   2   1 -13 14762.2 1366.05   1 
  -2   1  13 14340.8 724.085  18 
  -2  -1  12 33364.0 1169.94  10 
   2  -1 -12 28009.9 1299.07   1 
   2   1 -12 26700.5 1824.25   1 
  -2   1  12 36750.6 1304.41  20 
  -2   1  12 32247.9 2753.31   2 
  -2  -1  12 32251.2 1123.62  18 
  -2   1  12 32141.1 2797.62   3 
  -2   1  12 32488.5 1125.43  18 
  -2   1  12 29408.2 1168.61  10 
  -2   1  11 19003.1 2016.92   2 
  -2   1  11 17627.8 841.885  20 
  -2   1  11 19852.2 857.683  10 
  -2   1  11 19102.3 2036.14   3 
  -2  -1  11 22363.1 856.206  10 
   2  -1 -11 18108.7 954.280   1 
  -2  -1  11 20282.7 807.311  18 
  -2   1  10 20362.4 1987.89   2 
   2  -1 -10 20338.1 973.580   1 
   2  -1 -10 21396.2 987.758   1 
  -2   1  10 22010.7 2068.98   3 
   2  -1 -10 19189.0 1383.48   5 
  -2  -1  10 22016.6 1340.79   1 
  -2  -1   9 3555.26 483.552   1 
   2  -1  -9 3284.09 345.176   1 
   2  -1  -9 3113.27 328.914   1 
   2  -1  -9 3545.27 509.657   5 
  -2   1   9 3300.10 709.352   2 
  -2   1   9 3117.19 729.309   3 
   2  -1  -8 21422.9 1230.45   5 
  -2   1   8 23846.6 1941.70   3 
   2  -1  -8 21613.2 924.981   1 
  -2  -1   8 20999.5 1196.44   1 
  -2   1   8 22045.0 1854.75   2 
   2  -1  -8 22054.6 923.508   1 
  -2   1   7 18466.6 1609.02   3 
  -2  -1   7 19110.3 1062.77   1 
   2  -1  -7 16376.5 743.004   1 
   2  -1  -7 17090.4 780.831   1 
   2  -1  -7 17242.8 1001.72   5 
  -2   1   7 18304.5 1599.63   2 
   2  -1  -6 9922.30 551.810   1 
  -2   1   6 10752.3 1133.06   2 
   2  -1  -6 10516.7 534.304   1 
   2  -1  -6 10296.3 670.370   5 
  -2   1   6 11283.6 1170.11   3 
  -2  -1   6 10712.8 733.210   1 
  -2  -1   5 3926.90 412.959   1 
   2   1  -5 3941.88 431.096   1 
   2  -1  -5 3655.40 342.757   5 
   2  -1  -5 3828.38 626.365   2 
  -2   1   5 3790.52 648.522   3 
  -2   1   5 3627.69 329.023   1 
   2  -1  -5 3874.31 317.765   1 
   2  -1  -5 5068.53 725.803   3 
  -2   1   5 3849.81 650.060   2 
  -2  -1   4 12097.0 706.184   1 
  -2   1   4 12457.7 1144.90   2 
   2  -1  -4 13313.4 604.739   1 
   2  -1  -4 11887.9 1063.55   3 
   2  -1  -4 11723.1 1051.11   2 
  -2   1   4 12198.9 596.318   1 
  -2   1   4 12200.2 1144.06   3 
  -2   1   3 14699.5 616.481   5 
   2  -1  -3 14948.5 656.698   1 
  -2   1   3 13828.8 1168.43   2 
  -2   1   3 13941.3 1166.60   3 
  -2  -1   3 14889.6 745.675   1 
  -2   1   3 17345.7 726.467   1 
   2  -1  -3 15368.7 1178.52   3 
   2  -1  -3 13805.4 1122.72   2 
   2   1  -3 15451.8 778.263   1 
   2  -1  -2 32729.5 1761.27   2 
   2   1  -2 35324.0 1225.13   1 
   2  -1  -2 30323.1 1709.62   3 
   2  -1  -2 37681.0 1169.42   1 
  -2   1   2 39500.2 1225.98   1 
  -2  -1   2 35020.9 1193.33   1 
  -2   1   1 87140.4 2163.57   1 
   2  -1  -1 81222.9 1921.35   4 
   2   1  -1 73431.8 2001.63   1 
   2   1  -1 72366.0 2071.76   1 
   2  -1  -1 80133.5 2065.46   1 
  -2   1   0 57927.1 1682.13   1 
   2   1   0 52140.8 1451.21   1 
  -2   1   0 55451.3 1526.25   4 
   2  -1   0 57059.3 1514.10   4 
   2   1   0 55688.5 1543.16   1 
   2  -1   0 52662.4 1595.10   1 
   2   1   1 64557.9 1570.10   1 
   2   1   1 65858.6 1640.56   4 
  -2   1  -1 68669.4 1828.45   4 
   2  -1   1 64256.3 1768.51   4 
  -2   1  -1 60598.7 1875.94   1 
   2   1   1 65462.2 1636.76   1 
   2   1   1 57205.5 2305.71   5 
   2  -1   1 56284.9 1797.38   1 
   2   1   2 77867.8 2758.31   5 
   2  -1   2 78553.6 2200.09   1 
  -2  -1  -2 73692.8 2776.35   5 
   2   1   2 80741.0 1945.08   4 
  -2   1  -2 91368.7 2363.99   1 
   2   1   2 85697.3 1830.34   1 
  -2   1  -2 87313.5 2232.93   4 
  -2  -1  -2 80325.7 2343.46   3 
   2  -1   2 92695.6 2271.84   4 
  -2  -1  -2 81233.6 2348.44   2 
   2   1   3 133298. 3763.42   5 
   2  -1   3 113750. 2927.70   4 
   2   1   3 145868. 2768.91   4 
  -2   1  -3 113155. 2977.48   1 
   2   1   3 121792. 2345.05   1 
   2  -1   3 122498. 2988.64   1 
  -2  -1  -3 126646. 2712.10   4 
  -2  -1  -3 128662. 3167.49   2 
  -2  -1  -3 114991. 3691.65   5 
  -2  -1  -3 139622. 3255.89   3 
  -2   1  -3 123566. 3033.11   4 
   2  -1   4 2548.08 348.342   4 
  -2  -1  -4 2528.37 284.845   4 
   2   1   4 2607.22 290.119   4 
   2   1   4 2471.45 442.846   5 
  -2  -1  -4 1964.07 138.869   1 
  -2   1  -4 2167.53 327.244   4 
   2   1   4 1937.17 371.220   2 
  -2   1  -4 2305.20 334.215   1 
   2   1   4 1768.24 130.534   1 
   2   1   4 2053.19 362.210   3 
  -2  -1  -4 2348.56 452.483   5 
   2  -1   4 2139.63 303.679   1 
   2  -1   5 2847.23 370.490   1 
   2   1   5 2946.03 475.430   2 
  -2  -1  -5 2424.09 155.761   1 
   2   1   5 2873.79 468.794   3 
   2  -1   5 2746.65 396.789   4 
   2   1   5 2454.90 147.772   1 
  -2  -1  -5 3055.30 543.608   5 
  -2   1  -5 2697.18 391.203   4 
   2   1   5 2850.29 324.326   4 
  -2  -1  -5 3146.15 349.064   4 
  -2  -1  -6 98315.1 1888.75   1 
   2  -1   6 90885.9 2730.15   1 
   2   1   6 87364.0 3203.39   2 
   2   1   6 89378.4 3239.79   3 
  -2  -1  -6 102304. 2665.53   4 
  -2  -1  -7 5329.54 542.610   4 
   2  -1   7 5170.57 563.262   1 
   2   1   7 4548.98 674.554   2 
   2   1   7 5180.17 721.419   3 
  -2  -1  -7 4826.80 266.530   1 
   2   1   7 4786.81 250.031   1 
   2  -1   8 13340.5 952.174   1 
   2   1   8 9203.98 407.196   1 
   2   1   8 12281.8 1228.05   2 
   2   1   8 12305.3 1235.84   3 
  -2  -1  -8 12288.5 487.026   1 
  -2  -1  -9 9150.05 467.232   1 
   2   1   9 10224.3 1180.15   2 
   2   1   9 10614.2 1218.68   3 
   2  -1   9 10300.1 881.664   1 
  -2  -1  -9 11391.2 497.904   1 
   2   1  10 22329.5 1909.75   3 
   2  -1  10 22677.3 1398.39   1 
   2   1  10 21123.3 1847.34   2 
  -2  -1 -10 21165.5 777.226   1 
   2  -1  10 20761.4 945.785  27 
   2  -1  11 1011.63 161.480  10 
   2  -1  11 974.629 171.103  12 
   2  -1  11 913.030 289.387   1 
   2   1  11 1012.05 173.695  12 
   2  -1  11 1119.91 181.573  23 
   2   1  11 917.366 398.960   3 
   2   1  11 1078.79 196.075  18 
   2   1  11 704.294 328.656   2 
   2  -1  11 1051.27 166.572  18 
   2  -1  11 931.226 184.153  27 
   2   1  12 15435.6 784.664  18 
   2  -1  12 13425.4 1156.64   1 
   2  -1  12 15526.5 747.092  12 
   2   1  12 12749.8 1615.83   2 
   2   1  12 16545.1 772.699  12 
   2  -1  12 15605.3 743.159  18 
   2  -1  12 14512.8 854.984  27 
   2   1  12 13679.4 713.776  10 
   2  -1  12 14408.2 772.315  23 
   2  -1  12 15351.0 742.292  10 
   2   1  12 16340.9 837.036  27 
   2   1  12 13716.5 1689.74   3 
   2   1  13 7493.86 544.956  18 
   2  -1  13 6890.04 497.883  12 
   2   1  13 5509.80 1118.47   3 
   2   1  13 5900.23 472.344  10 
   2  -1  13 7077.30 503.265  18 
   2  -1  13 6819.45 839.803   1 
   2   1  13 7760.82 578.666  27 
   2   1  13 6990.90 506.899  12 
   2   1  13 6269.36 1220.51   2 
   2  -1  13 7226.25 504.057  10 
   2  -1  13 7386.68 529.835  23 
   2  -1  14 1553.80 234.224  12 
   2   1  14 1249.09 228.519  10 
  -2   1 -14 1757.20 236.636  15 
   2   1  14 1678.97 262.856  12 
   2   1  14 1739.51 263.742  18 
   2   1  14 1780.77 633.126   3 
   2  -1  14 1101.10 320.988   1 
   2   1  14 1273.07 496.813   2 
   2  -1  14 1547.93 239.392  10 
   2  -1  14 1798.51 255.423  18 
   2   1  14 1784.12 279.209  27 
   2   1  15 8352.77 655.082  27 
   2   1  15 5958.13 1266.73   2 
   2   1  15 6956.04 1332.06   3 
   2  -1  15 7596.76 570.947  12 
   2  -1  15 7603.22 567.801  18 
   2   1  15 7805.51 599.692  18 
   2  -1  15 7146.35 887.370   1 
   2   1  15 6824.63 548.512  10 
   2  -1  15 8075.15 586.458  10 
   2   1  16 29857.0 1345.98  27 
   2  -1  16 29790.7 1236.96  18 
   2  -1  16 27173.8 1215.25  10 
   2   1  16 26316.3 1222.10  18 
   2   1  16 26026.1 1184.82  10 
   2  -1  16 26955.5 1202.38  12 
  -2   1 -16 30617.2 1415.95   9 
  -2   1 -17 8754.81 739.848   9 
   2  -1  17 8617.14 652.608  10 
   2   1  17 7731.51 615.947  10 
   2   1  17 7692.82 686.436  27 
   2   1  17 7733.49 722.980  26 
   2  -1  17 8565.35 640.028  18 
   2   1  17 9113.08 679.818  18 
   2   1  18 3053.14 443.805  27 
  -2   1 -18 3761.62 479.869   9 
   2   1  18 3293.04 457.883  26 
   2   1  18 3370.31 415.904  18 
   2   1  18 3610.67 429.444  10 
   2  -1  18 3893.64 437.958  10 
   2  -1  18 3793.83 423.193  18 
   2   1  19 13637.3 882.429  10 
  -2   1 -19 15700.4 1026.09   9 
   2  -1  19 16668.8 931.527  18 
   2   1  19 15739.7 930.495  18 
   2  -1  19 15015.0 925.447  10 
   2   1  19 12902.1 974.124  26 
   2   1  20 17125.3 1106.64  26 
  -2   1 -20 21782.3 1200.65   9 
   2   1  20 19762.7 1062.41  18 
   2  -1  20 20709.8 1066.64  18 
   2  -1  20 20143.5 1089.00  10 
   2   1  20 17605.0 1020.09  10 
   2   1  20 16363.6 1074.13  20 
   2   1  21 446.487 165.449  20 
   2   1  21 622.705 203.563  26 
   2  -1  21 718.387 177.749  18 
   2   1  21 552.299 164.216  10 
  -2   1 -21 705.582 214.366   9 
   2   1  21 869.894 208.530  18 
   2  -1  21 565.792 167.573  10 
   2  -1  22 97.0421 70.7073  10 
   2   1  22-19.8966 100.677  20 
   2   1  22 49.8308 72.1770  18 
   2  -1  22 50.6046 58.9323  20 
   2   1  23 393.680 112.735  18 
   2   1  23 314.502 142.976  20 
   2  -1  23 409.093 148.261  10 
   2  -1  23 360.294 142.708  20 
   2  -1  24 958.090 199.861  10 
   2  -1  24 711.460 185.615  20 
   2   1  24 1155.93 233.945  20 
   2  -1  24 778.079 212.658  26 
   2  -1  25 445.038 128.337  20 
   2   1  25 397.189 134.947  20 
   2  -1  25 427.148 134.979  10 
   2  -1  26 16.7527 17.5776  20 
   2   1  26-90.2990 54.5425  20 
  -2   2  26 0.59437 50.5734  20 
  -2  -2  26 73.0761 53.4062  26 
   2   2 -25 86.5014 44.5446  19 
  -2  -2  25 147.336 53.6525  10 
  -2   2  25 135.995 59.2120  20 
  -2   2  25 189.872 101.098  26 
  -2   2  24 539.799 168.167  20 
  -2  -2  24 465.860 142.625  10 
  -2   2  24 620.493 183.472  26 
   2   2 -24 672.039 149.910  19 
  -2   2  23 2377.94 380.896  26 
  -2   2  23 2090.23 313.698  20 
  -2  -2  23 2578.30 356.331  10 
  -2   2  22 294.655 132.267  20 
  -2   2  22 243.728 122.155  26 
  -2  -2  22 257.773 114.219  10 
  -2  -2  22 244.600 104.974  20 
  -2  -2  21 749.162 206.989  10 
  -2   2  21 782.797 215.465  20 
  -2   2  21 643.148 208.578  26 
  -2  -2  21 728.537 186.554  20 
  -2  -2  20 564.075 184.765  10 
  -2   2  20 494.857 152.825  20 
  -2   2  20 413.637 159.409  26 
  -2  -2  20 542.384 157.937  20 
  -2   2  19 3630.78 419.045  18 
  -2  -2  19 3044.47 396.217  20 
   2   2 -19 3848.03 472.333   9 
  -2   2  19 3636.15 468.161  20 
  -2  -2  19 3708.49 441.282  10 
  -2   2  19 3279.91 523.014  26 
   2   2 -18 1876.81 332.855   9 
  -2   2  18 1744.62 275.567  18 
  -2  -2  18 2033.89 327.106  10 
  -2   2  18 2098.13 420.938  26 
  -2   2  18 2001.35 351.947  20 
  -2  -2  18 1760.00 297.643  20 
  -2  -2  17 17.3808 40.1954  10 
  -2  -2  17 89.1614 39.7377  20 
   2   2 -17 163.263 108.334   9 
  -2   2  17 153.837 127.367  26 
  -2   2  17 55.8050 12.5928  18 
  -2   2  17-31.0588 73.1231  20 
  -2   2  16 3503.59 375.399  18 
  -2   2  16 3228.71 487.459  26 
   2   2 -16 3236.40 338.877  15 
   2   2 -16 3398.39 441.177   9 
  -2   2  16 2952.68 407.026  20 
  -2  -2  16 3128.92 383.711  10 
  -2   2  15 3828.51 446.427  20 
  -2  -2  15 4211.01 432.310  10 
   2   2 -15 4009.57 471.429   9 
  -2   2  15 4342.60 407.814  18 
   2   2 -15 3759.93 371.125  15 
  -2   2  15 3763.31 535.863  26 
  -2   2  14 55.6644 26.2224  20 
  -2   2  14 14.4840 293.264   2 
  -2  -2  14 105.672 63.9870  13 
  -2   2  14 123.508 118.738  26 
  -2  -2  14 159.776 94.7218  10 
   2   2 -14 158.126 192.340   1 
  -2   2  14-290.063 336.358   3 
   2   2 -14 128.321 65.8101  15 
   2   2 -14 90.5363 60.7454   9 
  -2   2  14 40.9449 42.9428  18 
   2   2 -13 4755.97 488.663   9 
  -2  -2  13 5133.45 435.609  10 
  -2   2  13 4676.81 490.127  24 
  -2   2  13 3478.11 418.660  25 
   2   2 -13 4495.78 861.158   1 
  -2   2  13 3900.79 428.726  20 
  -2   2  13 3183.02 1067.05   2 
   2   2 -13 4545.43 391.008  15 
  -2  -2  13 4783.64 366.946  13 
  -2   2  13 3819.28 1212.99   3 
  -2   2  13 4133.89 514.141  26 
  -2   2  13 3921.65 355.013  18 
  -2   2  12 3426.25 392.957  25 
  -2  -2  12 3622.92 334.711  13 
  -2  -2  12 3792.23 680.370   1 
  -2   2  12 4676.57 463.398  24 
   2   2 -12 4066.53 359.971  15 
  -2  -2  12 4409.12 396.048  10 
   2   2 -12 3905.49 431.191   9 
  -2   2  12 3743.82 334.846  18 
  -2   2  12 3341.58 379.215  20 
  -2   2  12 3153.61 1068.40   2 
  -2   2  12 2042.11 929.650   3 
  -2   2  12 3858.08 487.050  26 
   2   2 -12 4547.30 394.451  16 
  -2   2  11 4607.80 350.224  18 
   2   2 -11 4175.64 355.282  15 
  -2   2  11 3926.44 430.740  25 
  -2   2  11 3695.14 465.492  26 
  -2  -2  11 4730.74 704.944   1 
  -2  -2  11 3787.42 336.865  13 
  -2  -2  11 5009.57 395.199  10 
   2   2 -11 4530.53 393.530  16 
  -2   2  11 4547.86 413.931  20 
  -2   2  11 2358.42 913.629   2 
  -2   2  11 3706.77 1108.32   3 
  -2   2  11 3852.70 427.155  24 
   2   2 -11 4199.52 432.187   9 
  -2  -2  10 12527.0 632.807  10 
   2   2 -10 12073.6 653.012  16 
  -2   2  10 9017.93 1620.02   2 
   2   2 -10 11504.6 606.825  15 
  -2   2  10 9993.33 751.876  26 
  -2  -2  10 11863.9 1124.38   1 
  -2   2  10 11873.5 1741.81   3 
  -2   2  10 11746.2 663.525  20 
   2   2 -10 11600.6 701.940   9 
  -2  -2   9 8634.12 499.859  10 
  -2  -2   9 8604.67 903.881   1 
   2   2  -9 8699.56 499.702  15 
  -2   2   9 7671.49 624.877  26 
  -2  -2   8 762.008 243.036   1 
   2  -2  -7 8950.80 523.083   4 
   2  -2  -7 9994.51 449.819   1 
   2  -2  -7 9951.92 435.998   1 
   2  -2  -6 24672.3 824.174   1 
  -2  -2   6 22525.1 1300.69   1 
  -2   2   6 18785.7 805.354   1 
   2  -2  -6 20074.7 735.630   4 
  -2   2   5 1558.95 228.872   1 
  -2   2   5 1885.58 339.095   5 
   2  -2  -5 1459.42 139.522   4 
   2  -2  -5 2074.48 232.006   1 
   2  -2  -5 1059.69 113.199   4 
  -2  -2   5 1798.49 336.917   1 
  -2   2   4 22222.4 983.708   1 
  -2   2   4 22374.0 1310.58   5 
  -2  -2   4 24099.0 1236.98   1 
   2  -2  -4 21529.0 919.455   1 
  -2   2   3 17851.9 1233.10   5 
  -2  -2   3 19021.1 1043.77   1 
   2  -2  -3 20727.9 913.834   1 
  -2   2   3 21480.8 998.935   1 
   2   2  -2 6644.16 590.054   1 
  -2  -2   2 6314.33 544.147   1 
   2  -2  -2 7245.55 541.324   1 
   2  -2  -2 7572.54 334.563   4 
  -2   2   2 7560.96 589.188   1 
   2   2  -1 3837.43 411.985   1 
   2  -2  -1 4206.03 426.083   1 
  -2   2   1 3426.87 407.316   1 
  -2  -2   1 3413.13 372.804   1 
   2  -2  -1 4123.05 285.790   4 
  -2   2   0 10287.4 748.306   1 
   2  -2   0 9574.18 680.953   1 
   2   2   0 8975.15 603.218   1 
   2   2   0 10551.2 1123.15   5 
   2   2   1 40868.2 1129.71   4 
  -2   2  -1 41430.3 1428.69   4 
   2   2   1 45103.8 2457.29   5 
   2   2   1 40996.8 1370.87   1 
   2   2   2 20092.3 1589.24   5 
  -2  -2  -2 21000.6 1537.92   3 
   2   2   2 19445.7 788.772   1 
  -2  -2  -2 19893.8 1497.53   2 
  -2   2  -2 17625.4 959.963   4 
   2   2   2 20928.0 636.331   4 
   2   2   2 22555.1 877.690   1 
   2  -2   2 21709.9 1150.48   1 
   2   2   3 26283.5 813.999   1 
  -2   2  -3 23975.5 1198.67   4 
   2  -2   3 25126.8 1310.80   1 
  -2  -2  -3 27092.9 1765.99   3 
  -2  -2  -3 25243.4 1714.65   2 
   2   2   3 25707.9 1809.90   5 
   2   2   3 21311.8 659.254   4 
  -2  -2  -4 51182.6 2571.29   3 
   2  -2   4 50186.1 2049.01   1 
   2   2   4 57015.0 2816.52   5 
  -2  -2  -4 48621.3 2496.85   2 
   2  -2   5 53970.5 2203.33   1 
   2   2   5 56887.9 2887.48   5 
   2   2   6 65436.9 3198.76   5 
   2  -2   6 60508.9 2460.94   1 
   2  -2   7 4910.18 645.122   1 
   2  -2   8 5128.13 681.514   1 
   2  -2   8 5634.28 411.941  23 
  -2   2  -8 5092.18 451.362   9 
   2  -2   8 5564.71 389.961  10 
   2  -2   9 7603.77 482.732  10 
   2  -2   9 7713.10 498.410  23 
   2  -2   9 7907.11 883.270   1 
  -2   2  -9 7087.94 556.916   9 
   2   2  10 2458.22 281.039  18 
   2  -2  10 2509.06 275.317  10 
  -2   2 -10 2627.42 341.102   9 
   2  -2  10 2540.72 495.620   1 
   2  -2  10 2890.90 314.758  23 
   2   2  11 8813.83 568.932  18 
   2   2  11 9200.60 612.101  27 
  -2   2 -11 10087.3 712.866   9 
   2  -2  11 7953.05 502.575  12 
   2  -2  11 8708.31 1028.90   1 
   2  -2  11 8638.66 562.779  10 
   2  -2  11 8469.60 489.637  18 
   2   2  11 7004.63 589.850  26 
  -2   2 -12 4029.69 395.681  15 
   2  -2  12 4945.51 384.733  12 
   2  -2  12 3932.62 696.950   1 
   2  -2  12 4114.05 353.705  18 
   2  -2  12 4589.01 415.594  10 
   2   2  12 4779.72 417.551  18 
  -2   2 -12 4571.42 486.913   9 
   2   2  12 3635.44 428.686  26 
   2   2  12 5034.51 449.284  27 
   2  -2  13 9284.34 632.704  10 
   2   2  13 8559.09 602.997  18 
   2  -2  13 8568.02 1083.48   1 
   2   2  13 8438.27 691.965  26 
   2  -2  13 9876.84 591.704  12 
   2   2  13 11141.6 709.879  27 
  -2   2 -13 9543.65 637.083  15 
   2  -2  13 9560.87 577.204  18 
  -2   2 -13 9852.92 766.922   9 
   2   2  14 3448.68 383.419  18 
   2   2  14 3394.46 389.119  27 
  -2   2 -14 3388.80 443.429   9 
  -2   2 -14 3373.73 372.233  15 
   2   2  14 2919.34 402.218  26 
   2  -2  14 3121.11 656.975   1 
   2  -2  14 3291.89 342.942  18 
   2  -2  14 3319.34 369.457  10 
   2  -2  14 3436.07 341.227  12 
   2   2  15 4832.75 511.358  20 
   2   2  15 5634.92 523.931  27 
   2  -2  15 5171.88 446.743  12 
   2  -2  15 5351.83 497.103  10 
   2   2  15 4575.28 524.448  26 
   2  -2  15 5571.36 458.407  18 
  -2   2 -15 5430.32 594.987   9 
  -2   2 -15 5297.57 481.706  15 
   2   2  15 5685.35 510.760  18 
   2  -2  16 13515.2 765.251  12 
  -2   2 -16 13353.4 959.824   9 
   2   2  16 12152.2 786.005  18 
   2  -2  16 13283.8 833.635  10 
  -2   2 -16 13184.5 785.723  15 
   2   2  16 11739.0 873.432  26 
   2   2  16 13597.7 845.373  27 
   2  -2  16 13143.7 744.541  18 
   2   2  16 10599.5 792.002  20 
  -2   2 -17 4899.75 577.679   9 
   2   2  17 4176.32 487.231  20 
   2   2  17 5163.24 497.097  18 
  -2   2 -17 4854.68 454.199  15 
   2  -2  17 4689.35 441.504  18 
   2  -2  17 4624.57 490.139  10 
   2   2  17 3819.04 486.928  26 
   2   2  18 4152.69 501.704  20 
   2  -2  18 4645.67 450.559  18 
   2  -2  18 4822.48 500.514  10 
  -2   2 -18 5102.20 603.760   9 
  -2   2 -18 4785.01 449.792  15 
   2   2  18 5417.33 513.481  18 
  -2   2 -19 2968.55 446.570   9 
   2  -2  19 2707.85 381.436  10 
   2   2  19 2117.84 324.492  18 
   2   2  19 2673.89 400.351  20 
   2   2  20 1064.55 247.723  20 
  -2   2 -20 867.762 244.970   9 
   2   2  20 917.434 203.257  18 
   2  -2  20 942.130 211.837  10 
   2  -2  21 188.232 102.040  10 
   2   2  21 85.2280 58.7783  18 
   2   2  21 93.1777 32.4522  20 
  -2   2 -21 206.486 119.796   9 
  -2   2 -22 2094.23 337.207   9 
   2  -2  22 2219.99 324.969  10 
   2  -2  22 1791.93 300.415  20 
   2   2  22 2272.36 298.204  18 
   2   2  22 1691.19 289.607  20 
   2   2  23 4465.40 451.330  20 
   2   2  23 5500.46 454.046  18 
   2  -2  23 5151.10 476.898  10 
   2  -2  23 4417.60 432.833  20 
   2  -2  24 3061.70 344.652  10 
   2  -2  24 2724.99 302.711  20 
   2   2  24 3235.85 348.721  20 
   2  -2  25 316.095 99.3747  10 
   2   2  25 200.163 66.8357  20 
   2   3 -25 1660.08 186.421  19 
  -2  -3  25 1651.86 216.200  10 
  -2  -3  24 2303.77 286.878  10 
   2   3 -24 2335.03 253.017  19 
  -2   3  24 1879.99 245.063  20 
   2   3 -23 746.069 159.621  19 
  -2   3  23 741.172 156.390  20 
  -2  -3  23 730.975 170.856  10 
  -2   3  23 369.312 119.643  26 
  -2  -3  22 83.6063 27.6203  10 
  -2   3  22 133.369 95.3918  26 
  -2   3  22-19.4932 21.4237  20 
  -2   3  21 1319.73 247.342  20 
  -2   3  21 1114.37 251.994  26 
  -2  -3  21 1562.31 273.282  10 
  -2   3  20-18.2583 73.5651  26 
  -2  -3  20 133.088 65.1328  10 
  -2   3  20 197.585 110.560  20 
  -2   3  19 3127.23 409.428  20 
   2   3 -19 2957.38 334.136  15 
  -2  -3  19 2984.84 401.156  10 
  -2   3  19 2531.85 437.913  26 
   2   3 -18 1926.77 359.327   9 
   2   3 -18 1863.52 281.679  15 
  -2  -3  18 1901.85 324.550  10 
  -2   3  18 1963.63 377.976  26 
  -2   3  18 1828.74 313.955  20 
  -2   3  17 4574.64 595.183  26 
   2   3 -17 5402.73 603.453   9 
   2   3 -17 5688.96 500.504  15 
  -2  -3  17 5358.28 534.661  10 
  -2   3  17 4617.84 497.105  20 
   2   3 -16 2577.47 406.481   9 
   2   3 -16 2298.38 326.319  15 
  -2   3  16 2177.54 344.069  20 
  -2  -3  16 2192.35 342.412  10 
  -2   3  16 1894.52 384.630  26 
  -2   3  15 4339.18 572.803  26 
  -2   3  15 4626.77 489.496  20 
  -2   3  15 5651.03 552.489  25 
  -2  -3  15 5434.87 522.446  10 
  -2   3  15 5548.91 563.197  24 
   2   3 -15 5456.82 503.741  15 
   2   3 -15 5463.79 612.426   9 
   2   3 -14 15816.8 896.424  15 
  -2   3  14 14164.4 952.264  25 
  -2  -3  14 16842.9 819.505  13 
  -2   3  14 16096.4 1012.69  24 
  -2   3  14 14617.6 1082.52  26 
  -2  -3  14 16848.6 924.300  10 
   2   3 -14 17626.3 1115.52   9 
  -2   3  14 14858.7 892.357  20 
   2   3 -13 3969.01 450.895  16 
   2   3 -13 4379.72 521.636   9 
   2   3 -13 4462.86 444.164  15 
  -2   3  13 3483.60 457.711  25 
  -2  -3  13 4251.89 380.976  13 
  -2   3  13 3868.29 423.929  20 
  -2   3  13 3767.20 523.406  26 
  -2   3  13 3998.14 498.133  24 
  -2  -3  13 4208.03 432.464  10 
  -2   3  12 1197.49 260.186  24 
  -2   3  12 1098.60 217.792  20 
  -2   3  12 1077.49 247.524  25 
  -2   3  12 1013.92 253.564  26 
  -2  -3  12 795.676 191.336  10 
   2   3 -12 984.610 211.993  15 
   2   3 -12 926.971 237.388   9 
  -2  -3  12 1046.10 179.666  13 
   2   3 -12 1156.86 232.919  16 
   2   3 -11 2945.77 352.022  15 
  -2   3  11 3204.58 427.236  25 
  -2   3  11 2763.72 323.646  20 
  -2   3  11 3156.94 436.443  24 
  -2  -3  11 2744.37 618.613   1 
  -2   3  11 2985.18 448.148  26 
   2   3 -11 3273.60 390.099  16 
   2   3 -11 3036.99 418.076   9 
  -2  -3  11 3101.46 349.673  10 
   2   3 -10 611.857 155.117  15 
  -2  -3  10 505.679 130.383  10 
  -2   3  10 339.050 124.734  24 
  -2   3  10 429.639 160.974  25 
  -2   3  10 435.424 117.867  14 
  -2  -3  10 475.197 250.171   1 
  -2   3  10 558.484 175.094  26 
   2   3 -10 628.786 186.108   9 
  -2   3  10 387.308 121.774  20 
   2   3 -10 578.043 159.643  16 
  -2   3   9 5313.27 494.012  21 
  -2  -3   9 6052.52 450.466  10 
  -2   3   9 5245.47 570.145  26 
  -2   3   9 5991.69 457.037  14 
  -2   3   9 4985.24 525.059  25 
   2   3  -9 5162.66 523.821   9 
   2   3  -9 5326.75 451.387  15 
  -2   3   9 4686.39 519.952  24 
   2   3  -9 5525.45 501.508  16 
  -2  -3   9 5208.06 777.264   1 
  -2   3   9 5192.28 422.973  20 
   2   3  -8 2279.61 310.776  16 
  -2   3   8 1612.58 227.356  14 
   2   3  -8 2259.68 278.405  15 
  -2  -3   8 2058.82 252.157  10 
   2   3  -8 1966.06 283.469  25 
  -2  -3   8 2204.08 475.668   1 
   2   3  -8 2067.39 319.346   9 
  -2   3   8 2124.14 346.311  24 
  -2   3   8 1696.59 236.563  20 
  -2   3   8 1097.01 245.496  21 
  -2   3   8 1891.35 322.774  25 
  -2   3   8 1783.90 315.055  26 
   2   3  -8 1634.74 274.787  24 
  -2   3   7 12938.0 645.723  20 
  -2  -3   7 14632.9 1252.75   1 
   2   3  -7 12349.5 736.460  16 
   2   3  -7 11916.1 745.066  21 
   2   3  -7 11889.4 665.986  15 
  -2   3   7 11861.7 756.854  21 
  -2   3   7 10518.6 630.121  14 
   2   3  -7 13076.8 751.531  24 
  -2   3   7 12091.9 815.489  25 
  -2   3   7 11777.5 813.510  26 
   2   3  -7 12409.3 785.243   9 
  -2  -3   7 13972.9 670.153  10 
  -2   3   7 12998.2 847.543  24 
   2   3  -7 12764.2 735.546  25 
  -2   3   6 11249.0 773.525  25 
  -2  -3   6 11510.4 1057.86   1 
  -2   3   6 10408.6 748.389  24 
   2   3  -6 13353.9 738.902  24 
  -2   3   6 13008.4 1187.00   5 
  -2   3   6 12276.5 811.546  26 
   2   3  -6 10521.7 699.191  21 
   2   3  -6 11356.3 633.941  15 
  -2  -3   6 13409.1 642.204  10 
   2   3  -6 11656.3 707.796  16 
  -2   3   6 11819.2 767.791  21 
  -2   3   6 12115.1 665.061  14 
   2   3  -6 13026.8 783.304   9 
   2   3  -6 12483.5 705.258  25 
  -2  -3   5 2870.42 505.520   1 
  -2   3   5 3235.54 395.274  25 
  -2   3   5 2982.86 315.536  14 
   2   3  -5 2884.33 349.113   9 
   2   3  -5 2811.72 326.757  24 
   2   3  -5 3023.93 301.889  15 
   2   3  -5 2812.13 337.872  16 
  -2   3   5 3236.00 399.658  24 
  -2   3   5 2845.78 579.902   5 
  -2   3   5 2338.72 321.416  21 
  -2   3   5 2943.77 370.809  26 
   2   3  -5 3168.27 345.596  25 
   2   3  -5 2489.37 335.388  21 
   2   3  -4 2653.91 317.002  25 
  -2   3   4 2834.28 359.639  21 
   2  -3  -4 2673.89 329.618   1 
   2   3  -4 2681.11 347.694  21 
  -2   3   4 2864.63 576.001   5 
  -2   3   4 2754.06 355.408  26 
  -2  -3   4 3859.69 548.634   1 
   2   3  -4 2681.21 326.004  24 
   2   3  -4 2693.88 276.677  15 
  -2   3   4 2773.59 360.868  24 
  -2   3   4 2857.70 306.354  14 
   2   3  -4 2363.85 305.702  16 
  -2   3   4 2487.53 345.063  25 
  -2   3   3 8052.86 624.333  25 
   2   3  -3 8250.41 577.233  25 
  -2   3   3 8556.85 1063.34   5 
  -2   3   3 7515.30 618.453  24 
  -2   3   3 9116.65 557.089  14 
   2   3  -3 8240.28 581.263  24 
  -2  -3   3 8569.31 793.223   1 
   2   3  -3 7387.49 605.248  21 
  -2   3   3 7787.58 616.336  21 
   2   3  -3 6631.32 447.364  15 
   2  -3  -3 8430.79 651.832   1 
  -2   3   3 7968.97 599.810  26 
   2   3  -3 8062.51 548.425  16 
   2  -3  -2 1068.09 239.398   1 
   2   3  -2 1109.69 198.720  24 
  -2  -3   2 1044.54 252.487   1 
  -2   3   2 1013.57 390.559   5 
  -2   3   2 895.276 199.742  25 
  -2   3   2 1082.33 219.243  26 
   2   3  -2 1045.43 194.970  25 
   2   3  -2 1210.97 191.917  16 
   2   3  -2 820.440 202.238  21 
  -2   3   2 1107.83 189.136  14 
  -2   3   2 989.771 211.645  24 
   2   3  -1 34465.4 1434.51  21 
   2   3  -1 43352.4 1495.49  24 
   2   3  -1 45169.8 1509.56  25 
  -2   3   1 44126.0 1543.22  26 
  -2   3   1 36698.7 1318.57  14 
  -2   3   1 45175.7 1584.11  24 
  -2  -3   1 44692.1 1787.97   1 
  -2   3   1 41531.3 1528.52  25 
   2   3  -1 37576.8 1303.76  14 
   2  -3  -1 41388.4 1753.86   1 
  -2   3   0 29783.9 1221.15  26 
   2   3   0 28382.5 1240.61  21 
   2   3   0 31808.5 1225.92  25 
   2  -3   0 26118.2 1426.02   1 
   2   3   0 31262.7 1225.14  24 
   2   3   0 29291.2 2427.08   5 
   2   3   0 33668.2 1603.62   1 
  -2   3   0 31338.3 1127.75  14 
   2   3   0 31248.0 1112.39  14 
   2   3   1 1514.59 204.270  14 
   2   3   1 1082.39 212.687  24 
   2   3   1 1206.85 224.974  25 
   2   3   1 1476.60 546.062   5 
  -2   3  -1 1299.94 206.843  14 
   2  -3   1 1197.27 284.083   1 
  -2   3  -1 1194.84 221.225  16 
   2   3   1 1105.34 227.412  21 
  -2   3  -1 1556.54 230.073   6 
   2   3   1 1315.39 271.824   1 
  -2   3  -1 1259.25 220.228  26 
   2  -3   2 1455.61 334.983   1 
   2   3   2 1655.19 248.545  24 
  -2   3  -2 1415.90 224.167   6 
   2   3   2 1690.27 268.158  21 
  -2   3  -2 1592.43 222.237  17 
   2   3   2 1912.49 575.647   5 
  -2   3  -2 1583.79 224.859  14 
   2   3   2 1256.63 243.118   1 
  -2   3  -2 1775.85 264.026  26 
   2   3   2 1483.95 242.211  25 
   2   3   2 1588.21 220.608  14 
  -2   3  -2 1470.44 251.950  16 
  -2   3  -3 2304.14 280.633  17 
  -2   3  -3 2473.05 294.305   6 
   2  -3   3 2089.04 428.242   1 
  -2   3  -3 2429.30 306.342   9 
  -2   3  -3 2071.14 258.890  14 
   2   3   3 1879.33 244.361   1 
   2   3   3 2090.95 290.825  21 
   2   3   3 2026.22 288.738  24 
  -2   3  -3 1750.86 223.823  15 
   2   3   3 1780.16 596.154   5 
  -2   3  -3 1985.13 294.428  16 
   2   3   3 1327.83 236.516  25 
   2   3   4 3753.16 830.538   5 
  -2   3  -4 3581.83 337.494  15 
  -2   3  -4 3526.78 377.802   9 
  -2   3  -4 3885.34 350.924  14 
   2   3   4 4176.39 432.159  21 
   2  -3   4 3387.81 547.265   1 
  -2   3  -4 4047.54 380.210  17 
  -2   3  -4 3762.53 398.145  16 
   2   3   4 3528.54 383.260  24 
   2   3   4 4913.62 438.632  25 
  -2   3  -5 1010.10 213.450   9 
   2  -3   5 1235.95 343.432   1 
  -2   3  -5 906.938 197.354  16 
   2   3   5 881.055 196.403  21 
  -2   3  -5 1101.76 208.140  17 
   2   3   5 1039.51 206.472  25 
  -2   3  -5 1388.54 212.947  15 
  -2   3  -5 1142.15 193.401  14 
   2   3   5 1135.90 213.156  24 
   2   3   5 998.755 449.493   5 
   2   3   6 40271.8 1518.69  24 
  -2   3  -6 36686.2 1490.04   9 
  -2   3  -6 35824.8 1313.95  14 
  -2   3  -6 44984.0 1510.54  17 
   2   3   6 45787.4 3072.48   5 
  -2   3  -6 43331.0 1427.29  15 
  -2   3  -6 41697.2 1560.17  16 
   2  -3   6 45495.2 2340.86   1 
   2  -3   6 41984.6 1378.75  10 
   2   3   6 44230.5 1559.78  25 
   2   3   6 34585.2 1451.00  21 
  -2   3  -7 33342.0 1259.87  14 
  -2   3  -7 38393.5 1380.58  15 
  -2   3  -7 42331.2 1596.28   9 
   2  -3   7 40135.4 1358.11  10 
   2   3   7 41655.0 1520.60  24 
   2   3   7 41365.1 1506.65  25 
   2  -3   7 39195.5 2256.87   1 
  -2   3  -7 35729.8 1466.79  16 
   2   3   7 37447.1 1489.47  21 
  -2   3  -8 6966.67 586.257  16 
   2  -3   8 6548.32 914.147   1 
  -2   3  -8 6523.85 588.813   9 
   2   3   8 7672.00 577.313  25 
  -2   3  -8 6606.07 513.177  15 
   2  -3   8 7066.45 517.158  10 
   2   3   8 7332.20 586.984  21 
   2   3   8 6695.76 552.398  24 
   2   3   8 6252.61 530.494  26 
   2   3   9 3829.00 440.467  21 
  -2   3  -9 3912.01 406.103  15 
   2   3   9 3358.58 379.424  24 
  -2   3  -9 3751.76 459.274   9 
   2  -3   9 4433.10 744.343   1 
   2   3   9 3359.49 383.909  25 
   2   3   9 2978.78 368.288  26 
   2  -3   9 4003.67 386.484  10 
  -2   3  -9 3980.19 431.037  16 
   2   3  10 9172.87 640.224  25 
  -2   3 -10 8943.02 637.974  15 
   2   3  10 9094.49 559.875  18 
   2   3  10 8647.21 631.302  24 
   2  -3  10 8416.52 595.646  10 
  -2   3 -10 8967.17 660.613  16 
   2   3  10 9801.95 668.480  21 
  -2   3 -10 8911.88 739.898   9 
   2  -3  10 9393.59 1159.84   1 
   2   3  11 3542.70 363.667  20 
  -2   3 -11 3686.45 399.678  15 
   2  -3  11 3922.23 410.419  10 
   2  -3  11 3302.75 723.282   1 
   2   3  11 3751.78 354.650  18 
  -2   3 -11 3834.86 431.302  16 
   2   3  11 3578.65 395.115  21 
  -2   3 -11 3700.34 485.872   9 
   2   3  12 2750.23 309.943  18 
   2  -3  12 2396.39 324.389  10 
   2   3  12 2307.58 305.588  20 
  -2   3 -12 2696.00 354.213  16 
  -2   3 -12 2381.96 340.345  15 
   2   3  12 2762.20 340.147  27 
  -2   3 -12 3089.33 447.423   9 
  -2   3 -13 13251.3 978.403   9 
  -2   3 -13 12208.6 781.475  16 
   2   3  13 13245.0 730.571  18 
  -2   3 -13 11889.1 790.073  15 
   2  -3  13 12587.8 803.283  10 
   2   3  14 13061.5 748.282  18 
   2   3  14 11652.4 771.880  20 
  -2   3 -14 13288.4 844.662  15 
  -2   3 -14 13825.5 1018.76   9 
   2  -3  14 13070.7 837.687  10 
  -2   3 -15 32487.6 1401.21  15 
   2  -3  15 33118.4 1402.50  10 
  -2   3 -15 30522.6 1614.39   9 
   2   3  15 31059.2 1249.95  18 
   2  -3  16 6401.96 580.530  10 
   2   3  16 5589.90 484.147  18 
  -2   3 -16 5881.97 655.611   9 
   2   3  16 4731.76 497.019  20 
  -2   3 -16 5556.23 533.647  15 
   2   3  17 1433.59 252.704  20 
   2   3  17 1607.37 262.143  18 
  -2   3 -17 1761.34 297.697  15 
   2  -3  17 2005.82 317.899  10 
  -2   3 -17 1761.62 382.125   9 
   2  -3  18 645.741 183.134  10 
   2   3  18 565.546 137.754  18 
  -2   3 -18 597.857 169.582  15 
   2   3  18 528.051 169.834  20 
  -2   3 -18 439.663 192.877   9 
   2   3  19 2840.07 332.527  18 
   2   3  19 2119.75 315.642  20 
  -2   3 -19 3281.62 470.774   9 
   2  -3  19 3076.80 408.985  10 
  -2   3 -19 2998.44 353.008  15 
   2   3  20 491.384 141.377  18 
  -2   3 -20 408.353 167.453   9 
   2  -3  20 459.566 155.453  10 
   2   3  20 521.972 158.979  20 
  -2   3 -20 550.613 144.389  15 
  -2   3 -21 711.433 202.317   9 
   2   3  21 705.709 159.118  18 
   2   3  21 863.362 189.359  20 
   2  -3  21 968.725 205.424  10 
   2   3  22 442.581 120.296  20 
  -2   3 -22 612.484 179.718   9 
   2  -3  22 825.197 179.406  10 
   2  -3  23 250.813 93.0779  10 
   2   3  23 213.426 85.0908  20 
   2  -3  24 365.705 98.0018  10 
   2   4 -23 1505.22 180.079  19 
   2   4 -22 191.371 69.5411  19 
  -2  -4  22 218.658 89.7314  10 
   2   4 -21 130.240 65.7263  19 
  -2  -4  21 8.19917 16.0785  10 
  -2   4  20 6433.59 478.673  20 
  -2   4  20 6339.48 547.529  26 
   2   4 -20 7193.26 512.793  19 
   2   4 -20 7309.42 494.011  15 
  -2  -4  20 7425.93 560.884  10 
  -2  -4  19 296.821 124.780  10 
  -2   4  19 236.225 119.455  26 
   2   4 -19 510.491 137.075  15 
   2   4 -19 343.650 126.649  19 
  -2   4  19 484.211 134.282  20 
  -2   4  18 125.271 88.4205  26 
   2   4 -18 183.440 98.6633  22 
   2   4 -18 248.017 103.535  19 
  -2  -4  18 253.585 114.810  10 
   2   4 -18 208.868 84.5571  15 
  -2   4  18 159.861 76.3873  20 
  -2  -4  17 2473.03 341.750  10 
   2   4 -17 1928.99 323.591  22 
   2   4 -17 2185.69 314.043  15 
  -2   4  17 1960.01 289.994  20 
  -2   4  17 2285.04 386.055  26 
  -2   4  16 181.148 84.5163  20 
  -2   4  16 246.026 153.650  26 
   2   4 -16 329.438 152.966  22 
  -2   4  16 246.117 111.698  24 
   2   4 -16 359.823 136.603  15 
  -2   4  16 323.905 133.570  25 
  -2  -4  16 255.003 128.746  10 
  -2  -4  15 7216.04 612.346  10 
   2   4 -15 6635.69 584.787  15 
  -2   4  15 5694.37 591.100  24 
  -2   4  15 6144.15 613.887  25 
  -2   4  15 6064.54 648.087  26 
  -2   4  15 6251.42 530.356  20 
  -2   4  14 1267.67 291.974  25 
   2   4 -14 1463.86 278.377  15 
  -2  -4  14 1650.18 278.839  10 
  -2   4  14 1285.74 229.813  20 
  -2   4  14 1320.01 310.435  26 
  -2   4  14 1437.03 295.390  24 
  -2  -4  14 1636.68 242.998  13 
  -2  -4  13 5112.00 503.150  10 
  -2   4  13 4700.47 575.818  24 
   2   4 -13 5308.74 567.018  16 
  -2   4  13 4579.68 437.177  20 
  -2   4  13 4559.56 565.231  25 
  -2  -4  13 4692.85 432.748  13 
  -2   4  13 4238.61 560.504  26 
   2   4 -13 4724.36 494.878  15 
  -2  -4  12 1593.14 278.275  10 
   2   4 -12 1643.62 288.344  15 
  -2   4  12 1849.39 266.621  20 
  -2   4  12 1646.27 358.664  25 
  -2   4  12 1431.29 345.795  26 
   2   4 -12 2028.94 343.942  16 
  -2   4  12 1874.78 367.360  24 
  -2  -4  12 1756.08 261.692  13 
  -2   4  11 1171.35 287.244  24 
   2   4 -11 1222.55 260.243  16 
  -2   4  11 1040.52 258.776  26 
  -2   4  11 926.456 215.404  21 
  -2  -4  11 1122.63 231.738  10 
  -2   4  11 1000.76 289.519  25 
   2   4 -11 1065.42 227.660  15 
   2   4 -10 6482.28 561.806  15 
  -2  -4  10 6570.90 534.982  10 
  -2   4  10 5594.32 627.996  25 
  -2   4  10 5436.05 637.931  26 
   2   4 -10 6228.83 609.417  16 
  -2   4  10 5857.15 660.460  24 
  -2   4  10 5190.01 575.085  21 
   2   4  -9 7791.24 624.167  15 
   2   4  -9 6664.00 633.853  21 
   2   4  -9 8163.71 695.706  16 
  -2   4   9 8159.54 751.649  26 
  -2   4   9 8153.89 770.260  24 
  -2  -4   9 8479.20 605.113  10 
  -2   4   9 8197.20 762.369  25 
  -2   4   9 9251.58 660.366  14 
  -2   4   9 7659.18 696.670  21 
  -2   4   8 5768.34 524.438  14 
   2   4  -8 5191.20 564.008  21 
  -2   4   8 6780.33 695.264  21 
  -2  -4   8 6308.19 515.815  10 
  -2   4   8 6824.05 704.774  24 
   2   4  -8 6609.10 617.561  24 
   2   4  -8 7399.40 637.121  25 
  -2   4   8 6058.16 647.017  26 
   2   4  -8 6303.08 612.795  16 
  -2   4   8 6812.74 695.066  25 
   2   4  -8 6458.12 551.151  15 
   2   4  -7 172.882 92.4453  24 
  -2  -4   7 84.7731 69.0206  10 
   2   4  -7 51.8660 50.5010  25 
   2   4  -7 75.2359 80.5289  21 
  -2   4   7 173.047 103.965  21 
  -2   4   7 23.3309 62.9583  26 
   2   4  -7 133.914 90.5902  15 
  -2   4   7 74.0583 99.8917  25 
  -2   4   7 52.3954 52.7503  24 
  -2   4   7 58.3346 53.6710  14 
   2   4  -7 122.850 98.9269  16 
   2   4  -7 123.997 64.0408  19 
   2   4  -6 2599.63 266.229  19 
   2   4  -6 3472.69 436.641  25 
   2   4  -6 3701.31 439.578  16 
  -2   4   6 2491.10 403.651  21 
  -2   4   6 3060.49 453.699  24 
  -2  -4   6 3118.18 340.497  10 
  -2   4   6 2742.24 413.256  26 
  -2   4   6 2537.43 340.859  16 
   2   4  -6 3320.67 428.599  24 
   2   4  -6 2771.92 342.832  15 
  -2   4   6 2890.95 440.530  25 
  -2   4   6 2232.90 318.123  14 
   2   4  -6 2830.92 414.184  21 
   2   4  -5 2117.49 336.194  24 
   2   4  -5 2226.59 386.265  21 
  -2   4   5 1508.77 273.177  16 
  -2   4   5 1619.24 315.914  26 
   2   4  -5 1447.34 191.518  19 
  -2   4   5 1663.03 243.326  17 
   2   4  -5 1198.80 434.539   1 
  -2   4   5 1946.21 340.842  24 
  -2   4   5 1407.39 311.125  25 
  -2   4   5 1810.08 288.185  14 
  -2  -4   5 2051.53 268.607  10 
   2   4  -5 1786.79 300.592  16 
  -2   4   5 1523.14 300.964  21 
   2   4  -5 1631.63 300.681  25 
   2   4  -5 1679.51 257.886  15 
  -2   4   4 6731.47 667.807  24 
  -2   4   4 10246.4 653.591  17 
  -2   4   4 10493.7 706.404  14 
   2   4  -4 10640.5 653.643  15 
   2   4  -4 11239.9 781.829  16 
   2   4  -4 9594.58 779.343  21 
  -2   4   4 9401.99 797.232  21 
   2   4  -4 9541.10 1185.82   1 
  -2   4   4 9912.81 718.354  16 
   2   4  -4 10436.3 775.780  24 
  -2   4   4 11166.2 818.246  26 
   2   4  -4 11005.3 782.984  25 
  -2  -4   4 10075.6 594.652  10 
  -2   4   4 7130.95 689.252  25 
  -2   4   3 3173.60 348.712  17 
  -2  -4   3 3038.24 310.657  10 
   2   4  -3 2229.83 563.043   1 
   2   4  -3 3026.67 436.263  21 
   2   4  -3 2779.59 368.395  16 
  -2   4   3 2944.48 371.791  14 
  -2   4   3 2584.07 410.185  21 
   2   4  -3 2822.09 386.372  25 
  -2   4   3 3126.78 422.964  26 
   2   4  -3 2724.42 321.136  15 
   2   4  -3 1743.65 777.454   5 
  -2   4   3 2389.78 389.038  25 
   2   4  -3 3055.20 407.408  24 
  -2   4   3 2994.58 440.834  24 
  -2   4   3 2310.72 341.445  16 
   2   4  -2 819.538 235.436  21 
   2   4  -2 800.062 214.223  25 
  -2   4   2 832.812 214.509  24 
  -2   4   2 824.782 235.756  21 
  -2   4   2 715.266 187.957  16 
   2   4  -2 897.587 179.874  15 
   2   4  -2 838.628 210.537  16 
  -2   4   2 1020.56 245.459  26 
  -2   4   2 1092.36 217.570  17 
  -2   4   2 474.670 417.058   5 
  -2   4   2 743.717 196.628  25 
  -2   4   2 1109.75 218.566  14 
   2   4  -2 932.549 225.934  24 
   2   4  -2 582.056 243.540   1 
   2   4  -2 840.299 555.516   5 
   2   4  -1 16724.4 1102.02  21 
  -2   4   1 20708.5 1195.72  24 
   2   4  -1 23888.9 985.309  15 
  -2   4   1 21138.7 1194.69  25 
  -2   4   1 24166.6 1197.56  16 
   2   4  -1 24720.5 1138.46  16 
  -2   4   1 23147.7 1281.05  21 
  -2   4   1 19550.1 2138.30   5 
   2   4  -1 22341.4 1175.92  24 
  -2   4   1 21326.1 898.492  15 
  -2   4   1 24236.5 1125.68  14 
  -2   4   1 25291.5 1270.94  26 
   2   4  -1 24782.1 1223.93  25 
  -2   4   1 23629.6 1077.06  17 
   2   4  -1 23559.4 2633.29   5 
  -2   4   0 97.7459 93.7890  24 
  -2   4   0 196.226 113.638  16 
   2   4   0 139.498 268.790   5 
   2   4   0 88.7867 75.9064  21 
  -2   4   0 248.214 103.708  25 
   2  -4   0 194.596 146.504   1 
  -2   4   0 122.025 127.241   5 
   2   4   0 199.677 110.536  25 
  -2   4   0 322.073 129.191  26 
  -2   4   0 229.178 95.2129  14 
  -2   4   0 195.676 86.5908  15 
   2   4   0 286.119 112.827  16 
   2   4   0 332.310 154.890  24 
  -2   4   0 182.070 86.4965  17 
   2   4   0 225.790 84.7171  15 
  -2   4   0 92.9110 90.2184  21 
  -2   4  -1 166.846 66.6019  15 
  -2   4  -1 219.078 98.6730  21 
  -2   4  -1 325.974 140.479  25 
   2   4   1 150.972 118.163  21 
   2   4   1 189.301 81.9839  16 
   2   4   1-45.1322 292.956   5 
  -2   4  -1 180.625 78.8450  24 
  -2   4  -1 165.334 89.8402  17 
   2   4   1 253.744 83.9278  15 
  -2   4  -1 235.105 123.450  16 
   2   4   1 210.032 125.237  25 
  -2   4  -1 229.050 115.755  14 
   2  -4   1 177.150 134.755   1 
   2   4   1 297.367 151.405  24 
   2   4   2 17589.4 779.132  15 
   2   4   2 12210.3 789.379  22 
   2   4   2 12559.1 886.843  25 
   2   4   2 15664.3 1010.22  21 
   2   4   2 16121.3 870.787  16 
  -2   4  -2 17242.8 830.572  15 
  -2   4  -2 16703.9 922.870  17 
  -2   4  -2 14390.5 1020.97  21 
  -2   4  -2 17146.4 930.069  14 
  -2   4  -2 14201.8 943.696  16 
   2   4   2 19082.4 1076.62  24 
   2  -4   2 15969.0 1305.52   1 
   2   4   2 15156.9 2071.72   5 
  -2   4  -2 16628.9 1008.64  24 
  -2   4  -2 15870.6 976.257  25 
   2   4   3 527.627 183.028  25 
   2   4   3 308.619 119.333  26 
   2   4   3 382.137 154.109  24 
  -2   4  -3 227.680 106.851  25 
   2   4   3 140.845 86.4917  16 
   2   4   3 216.776 109.191  21 
   2   4   3 32.5165 202.198   5 
  -2   4  -3 283.231 136.942  16 
  -2   4  -3 229.020 97.7079  17 
   2   4   3 261.015 104.288  22 
  -2   4  -3 291.540 118.376  14 
  -2   4  -3 381.425 163.126  21 
  -2   4  -3 189.944 81.5335  15 
   2  -4   3 268.104 190.014   1 
  -2   4  -3 315.108 132.072  24 
   2   4   4 2906.79 347.259  22 
   2   4   4 2948.74 437.313  21 
  -2   4  -4 3427.35 428.741  24 
   2   4   4 3701.30 425.640  26 
   2  -4   4 3123.85 608.504   1 
  -2   4  -4 3505.93 443.173   9 
   2   4   4 3211.18 430.107  25 
   2   4   4 3483.21 962.695   5 
  -2   4  -4 3583.33 405.402  14 
  -2   4  -4 3409.19 470.558  21 
  -2   4  -4 3135.05 414.742  17 
  -2   4  -4 3734.82 462.937  16 
   2   4   4 2986.66 412.919  24 
  -2   4  -4 2973.42 343.662  15 
  -2   4  -4 3341.66 422.733  25 
   2   4   4 3319.08 354.596  16 
   2   4   5 1610.36 308.625  25 
  -2   4  -5 1429.70 248.166  15 
   2   4   5 1296.27 273.013  24 
   2   4   5 1681.59 694.913   5 
  -2   4  -5 1444.80 336.336  21 
  -2   4  -5 1379.06 240.424  14 
   2   4   5 1212.14 259.617  21 
   2  -4   5 1670.86 264.770  10 
  -2   4  -5 1586.28 321.438  16 
  -2   4  -5 1550.10 281.417  25 
  -2   4  -5 1460.13 286.042   9 
   2  -4   5 1081.65 378.036   1 
  -2   4  -5 1352.93 260.817  24 
   2   4   5 1541.65 267.195  26 
   2  -4   6 4160.41 423.608  10 
   2   4   6 3958.80 478.574  25 
  -2   4  -6 3897.73 417.404  15 
   2   4   6 3654.30 913.281   5 
   2  -4   6 3754.33 730.568   1 
   2   4   6 3665.31 474.546  21 
  -2   4  -6 4269.13 439.389  14 
   2   4   6 4180.32 456.815  26 
  -2   4  -6 4226.87 503.684  16 
   2   4   6 4273.69 503.804  24 
  -2   4  -6 4442.33 473.802  25 
  -2   4  -6 4162.55 468.377  24 
  -2   4  -6 4038.61 509.298  21 
  -2   4  -6 3875.81 489.894   9 
  -2   4  -7 2213.65 318.790  24 
  -2   4  -7 2111.31 325.599  25 
  -2   4  -7 2407.70 380.631  16 
  -2   4  -7 2199.26 379.612   9 
   2   4   7 2545.62 386.303  24 
  -2   4  -7 2047.27 364.243  21 
   2   4   7 1868.84 306.993  26 
   2  -4   7 2163.33 309.562  10 
  -2   4  -7 1827.17 288.748  14 
   2   4   7 2338.86 371.768  25 
  -2   4  -7 1797.97 288.657  15 
   2   4   7 2323.80 374.584  21 
   2   4   8 6446.75 621.891  24 
   2   4   8 7318.13 668.037  21 
  -2   4  -8 6640.01 557.891  25 
   2   4   8 6122.36 608.903  25 
  -2   4  -8 5956.90 644.739   9 
  -2   4  -8 5851.67 614.004  16 
  -2   4  -8 5529.04 491.745  14 
  -2   4  -8 6750.88 690.069  21 
   2  -4   8 6373.65 544.298  10 
  -2   4  -8 6510.61 575.362  15 
  -2   4  -8 6623.08 572.895  24 
  -2   4  -9 235.056 170.072  21 
   2   4   9 121.801 81.9848  25 
   2   4   9 106.801 37.3535  24 
   2   4   9 228.620 120.291  21 
  -2   4  -9 130.409 105.442  16 
  -2   4  -9 168.549 125.721  15 
  -2   4  -9 246.756 131.825   9 
   2  -4   9 123.633 71.3760  10 
  -2   4 -10 630.828 189.577  21 
   2   4  10 710.802 203.526  25 
   2   4  10 1020.73 253.607  21 
   2   4  10 702.493 206.685  24 
  -2   4 -10 789.050 201.893  15 
  -2   4 -10 1088.26 285.799   9 
   2  -4  10 569.302 157.985  10 
  -2   4 -10 836.769 222.137  16 
   2   4  11 398.391 149.931  25 
   2   4  11 308.494 137.203  24 
  -2   4 -11 567.659 165.684  15 
   2  -4  11 509.763 150.051  10 
   2   4  11 664.890 192.578  21 
  -2   4 -11 309.331 157.709   9 
  -2   4 -11 423.418 152.041  16 
   2   4  12 21377.6 1111.93  21 
  -2   4 -12 20418.8 1121.36  15 
   2   4  12 16470.0 997.899  24 
  -2   4 -12 20577.0 1157.34  16 
   2  -4  12 20335.2 1075.46  10 
   2   4  12 22429.6 1134.56  25 
  -2   4 -12 21000.4 1320.81   9 
  -2   4 -13 18145.4 1044.83  16 
   2  -4  13 15696.1 954.738  10 
  -2   4 -13 17701.7 1213.81   9 
  -2   4 -13 17375.9 1032.80  15 
  -2   4 -14 3671.19 531.377   9 
  -2   4 -14 3629.40 445.559  15 
   2  -4  14 3449.44 419.164  10 
  -2   4 -14 3622.08 442.934  16 
   2  -4  15 23908.6 1201.15  10 
  -2   4 -15 23772.7 1213.48  15 
  -2   4 -15 26868.2 1505.86   9 
  -2   4 -15 28007.5 1243.86  16 
  -2   4 -16 10806.0 922.199   9 
  -2   4 -16 11263.0 786.435  15 
   2  -4  16 11880.7 799.910  10 
  -2   4 -17 1346.91 309.285   9 
  -2   4 -17 1276.09 252.363  15 
   2  -4  17 1526.67 265.374  10 
   2  -4  18 1098.07 229.124  10 
  -2   4 -18 1040.85 201.362  15 
  -2   4 -18 1125.13 286.187   9 
  -2   4 -19 445.870 168.505   9 
  -2   4 -19 473.745 126.010  15 
   2  -4  19 526.491 135.908  10 
   2  -4  20 904.598 181.795  10 
  -2   4 -20 1074.92 178.539  15 
   2  -4  21-30.6290 26.6662  10 
  -2   4 -22 53.9622 28.1804  19 
   2  -4  22 26.7936 12.8887  10 
   2   5 -19 219.623 71.2003  19 
  -2  -5  19 151.483 73.7649  10 
   2   5 -19 171.005 78.0183  15 
   2   5 -18 254.267 108.723  22 
  -2  -5  18 204.024 84.5325  10 
   2   5 -18 113.998 53.8391  15 
   2   5 -18 152.423 85.5738  11 
   2   5 -18 83.5647 57.6367  19 
   2   5 -17 97.3780 81.6065  22 
   2   5 -17 52.2086 25.5400  19 
   2   5 -17-58.2689 71.1427  15 
  -2  -5  17 7.10108 31.5891  10 
   2   5 -17 48.4806 53.0567  11 
  -2  -5  16 947.113 186.689  10 
  -2   5  16 807.980 194.198  26 
   2   5 -16 929.717 163.900  19 
   2   5 -16 923.200 193.074  15 
   2   5 -16 782.442 186.652  22 
  -2   5  15 128.661 87.1063  24 
  -2  -5  15 198.525 94.5404  10 
  -2   5  15 371.743 148.463  25 
  -2   5  15 261.131 147.361  26 
   2   5 -15 188.568 79.9818  19 
   2   5 -15 298.421 125.653  15 
   2   5 -15 212.347 55.6854  22 
  -2  -5  14 4968.18 463.155  10 
  -2   5  14 3934.20 456.403  25 
  -2   5  14 4506.24 517.952  26 
   2   5 -14 5153.27 422.874  19 
  -2  -5  14 4903.60 407.791  13 
   2   5 -14 4376.86 509.313  22 
   2   5 -14 4309.61 463.039  15 
  -2   5  14 3144.49 424.949  24 
  -2  -5  13 6564.19 546.322  10 
  -2  -5  13 5926.56 480.862  13 
   2   5 -13 5703.98 538.689  15 
   2   5 -13 6028.24 621.954  22 
   2   5 -13 6306.22 476.113  19 
  -2   5  13 5313.62 578.911  24 
  -2   5  13 6896.19 658.303  25 
  -2   5  13 5822.97 615.644  26 
   2   5 -12 12007.0 878.828  16 
  -2   5  12 9326.53 813.480  24 
  -2   5  12 10979.6 858.517  25 
   2   5 -12 11974.5 803.674  15 
   2   5 -12 9216.16 791.957  22 
  -2  -5  12 9799.46 656.912  13 
  -2  -5  12 10409.2 707.505  10 
   2   5 -12 10920.8 634.908  19 
  -2   5  12 10206.0 826.078  26 
   2   5 -11 4185.45 377.896  19 
  -2   5  11 4635.78 514.016  21 
  -2   5  11 5969.49 631.156  26 
  -2  -5  11 4376.88 452.312  13 
  -2   5  11 5770.56 648.846  25 
   2   5 -11 5410.54 589.794  16 
   2   5 -11 3717.70 440.471  15 
  -2  -5  11 5151.70 474.269  10 
  -2   5  11 4897.10 602.034  24 
   2   5 -10 23674.4 1187.87  15 
  -2  -5  10 24715.6 1115.67  10 
   2   5 -10 26512.9 1368.14  16 
  -2   5  10 23447.2 1275.89  21 
  -2   5  10 19211.4 1243.07  24 
   2   5 -10 21451.3 925.744  19 
  -2   5  10 16725.5 1157.61  25 
  -2   5  10 20276.2 1254.80  26 
  -2   5   9 4590.00 552.737  21 
  -2   5   9 4548.70 586.048  25 
   2   5  -9 4969.70 582.359  16 
  -2  -5   9 4653.81 450.549  10 
  -2   5   9 4357.35 551.633  26 
   2   5  -9 4050.99 468.323  15 
  -2   5   9 4244.03 576.093  24 
   2   5  -9 4861.70 556.281  21 
  -2  -5   8 5203.76 471.844  10 
  -2   5   8 5253.26 642.318  24 
  -2   5   8 4880.75 616.524  25 
  -2   5   8 4458.55 581.466  21 
   2   5  -8 5184.09 524.904  15 
   2   5  -8 5940.46 622.626  16 
   2   5  -8 5184.13 604.743  21 
  -2   5   8 5304.52 616.545  26 
   2   5  -7 17566.7 986.525  15 
  -2   5   7 17736.1 1205.26  21 
  -2   5   7 17731.6 1143.01  26 
   2   5  -7 17794.3 1134.19  24 
   2   5  -7 15295.9 1070.38  21 
   2   5  -7 17280.6 1112.79  25 
  -2   5   7 16420.6 1179.31  24 
  -2   5   7 16725.1 1164.37  25 
  -2  -5   7 14373.8 836.804  10 
   2   5  -7 17672.6 1146.37  16 
  -2   5   6 2937.10 481.454  24 
  -2   5   6 3348.13 517.793  25 
   2   5  -6 3912.94 528.867  24 
   2   5  -6 3977.28 563.037  21 
   2   5  -6 3857.07 433.312  15 
  -2   5   6 3821.03 523.662  26 
  -2   5   6 3954.21 475.592  14 
  -2  -5   6 3882.46 399.764  10 
  -2   5   6 3816.64 433.251  16 
   2   5  -6 4458.80 518.111  16 
  -2   5   6 3993.55 535.632  21 
   2   5  -6 3865.99 505.079  25 
  -2  -5   5 2473.68 320.319  10 
  -2   5   5 1603.68 362.991  25 
  -2   5   5 3080.06 461.584  26 
   2   5  -5 2284.38 405.426  21 
  -2   5   5 2493.12 430.317  24 
  -2   5   5 2279.24 439.030  21 
   2   5  -5 2715.18 411.914  16 
   2   5  -5 2397.64 331.281  15 
  -2   5   5 3057.87 423.061  14 
  -2   5   5 2924.60 389.961  16 
   2   5  -5 2989.45 439.299  25 
   2   5  -5 2883.79 445.953  24 
   2   5  -4 3079.44 378.123  15 
  -2   5   4 3318.56 526.496  21 
  -2   5   4 3742.03 532.384  24 
  -2   5   4 3376.49 503.651  26 
  -2   5   4 3328.26 381.439  17 
   2   5  -4 2889.60 455.310  24 
  -2   5   4 3712.59 454.540  16 
   2   5  -4 3753.97 505.974  25 
   2   5  -4 3227.30 437.242  16 
  -2   5   4 3826.11 532.288  25 
   2   5  -4 3140.69 507.171  21 
  -2  -5   4 3311.59 361.688  10 
  -2   5   4 3027.98 425.622  14 
   2   5  -3 9320.02 808.899  25 
  -2   5   3 8351.92 646.946  17 
  -2   5   3 9578.16 764.125  16 
  -2   5   3 9699.81 882.235  21 
  -2   5   3 6656.06 645.090  14 
  -2  -5   3 9622.82 617.186  10 
  -2   5   3 10916.4 873.526  26 
   2   5  -3 9668.65 780.098  16 
  -2   5   3 8969.92 834.769  25 
   2   5  -3 7772.77 798.389  21 
   2   5  -3 10716.1 873.521  24 
   2   5  -3 10905.5 703.675  15 
  -2   5   3 6654.27 730.263  24 
  -2   5   2 199.677 125.343  16 
  -2   5   2 450.760 154.396  17 
   2   5  -2 404.738 154.224  22 
   2   5  -2 487.410 131.923  15 
  -2   5   2 361.636 168.105  24 
  -2  -5   2 406.112 122.972  10 
  -2   5   2 400.436 141.855  21 
  -2   5   2 460.251 195.119  25 
   2   5  -2 418.065 183.366  21 
  -2   5   2 401.186 161.088  14 
   2   5  -2 471.284 187.173  25 
   2   5  -2 591.157 182.387  16 
   2   5  -2 514.668 195.013  24 
   2   5  -1 466.090 161.106  24 
   2   5  -1 307.645 161.077  22 
  -2   5   1 400.573 176.710  21 
   2   5  -1 313.141 159.252  21 
   2   5  -1 481.666 169.615  16 
   2   5  -1 268.083 95.1481  15 
   2   5  -1 446.072 161.626  25 
  -2   5   1 243.773 115.281  14 
  -2   5   1 333.819 156.745  16 
  -2   5   1 401.221 158.682  24 
  -2   5   1 115.544 36.0388  25 
   2   5   0 3340.29 486.707  25 
  -2   5   0 3001.12 502.708  21 
   2   5   0 3325.83 510.488  21 
   2   5   0 2641.03 440.469  24 
   2   5   0 2041.32 349.502  22 
  -2   5   0 3221.30 477.098  25 
  -2   5   0 2762.53 317.516  15 
  -2   5   0 2881.99 431.007  16 
  -2   5   0 3029.73 422.202  14 
  -2   5   0 3283.07 495.532  24 
   2   5   0 3254.96 356.727  15 
   2   5   0 2530.82 384.598  16 
   2   5   1 393.148 188.698  24 
  -2   5  -1 599.661 188.332  25 
   2   5   1 410.086 166.036  22 
  -2   5  -1 454.804 178.265  14 
   2   5   1 563.848 208.654  25 
  -2   5  -1 400.559 129.492  15 
   2   5   1 637.223 221.644  21 
  -2   5  -1 763.701 254.647  21 
  -2   5  -1 407.323 154.530  16 
  -2   5  -1 536.776 202.165  24 
   2   5   1 450.529 135.023  16 
   2   5   1 502.127 137.323  15 
  -2   5  -2 2417.25 450.074  21 
  -2   5  -2 3235.86 367.768  15 
  -2   5  -2 3057.52 424.167  14 
   2   5   2 2620.93 358.333  16 
   2   5   2 2615.39 441.220  21 
   2   5   2 3352.78 496.197  24 
   2   5   2 2755.58 386.091  22 
   2   5   2 3239.53 474.921  25 
  -2   5  -2 2920.40 463.585  24 
  -2   5  -2 3146.61 470.054  25 
  -2   5  -2 2236.43 400.789  16 
   2   5   3 865.967 234.703  21 
  -2   5  -3 1075.16 274.276  24 
   2   5   3 1056.56 221.407  22 
  -2   5  -3 951.004 244.940  14 
   2   5   3 1074.11 273.616  25 
  -2   5  -3 1029.92 299.575  21 
  -2   5  -3 1059.06 260.102  25 
   2   5   3 810.193 193.034  11 
  -2   5  -3 980.300 200.836  15 
  -2   5  -3 1219.42 285.142  16 
   2   5   3 1184.31 236.025  16 
   2   5   3 1205.98 287.086  24 
  -2   5  -4 3508.97 547.784  21 
  -2   5  -4 3604.52 492.071  16 
   2  -5   4 3186.18 416.041  10 
  -2   5  -4 3755.70 483.975  25 
  -2   5  -4 3701.24 461.951  14 
   2   5   4 4073.00 579.873  21 
   2   5   4 4148.43 542.381  24 
   2   5   4 3393.30 493.256  25 
  -2   5  -4 4081.30 513.477  24 
  -2   5  -4 3240.14 393.218  15 
   2   5   4 4236.75 425.377  16 
   2   5   5 314.072 170.256  21 
  -2   5  -5 335.513 158.806  24 
  -2   5  -5 397.548 199.238  16 
   2   5   5 352.499 168.779  25 
   2  -5   5 491.412 147.151  10 
  -2   5  -5 356.006 129.513  15 
   2   5   5 312.889 154.952  24 
  -2   5  -5 375.862 194.053  21 
  -2   5  -5 326.851 129.537  14 
  -2   5  -5 316.310 139.791  25 
   2   5   6 34.1152 75.1040  21 
  -2   5  -6 42.3529 72.6478  24 
  -2   5  -6 144.557 98.9822  14 
  -2   5  -6 163.900 117.039  16 
  -2   5  -6 61.8163 48.2514  15 
   2  -5   6 7.82687 26.1428  10 
  -2   5  -6 105.359 92.0416  25 
   2   5   6 187.434 117.594  24 
  -2   5  -6 85.6973 85.0464  21 
   2   5   6 33.0325 66.8891  25 
  -2   5  -7 709.133 203.257  24 
  -2   5  -7 627.871 178.629  25 
   2  -5   7 880.570 209.253  10 
   2   5   7 595.541 185.399  21 
  -2   5  -7 463.079 183.664  21 
   2   5   7 759.873 239.279  24 
   2   5   7 696.204 216.599  25 
  -2   5  -7 610.168 173.722  14 
  -2   5  -7 687.366 225.298  16 
  -2   5  -7 575.929 157.761  15 
   2   5   8 1238.67 287.663  25 
  -2   5  -8 1204.28 301.311  21 
  -2   5  -8 1396.31 305.753  25 
   2   5   8 1319.53 299.707  24 
  -2   5  -8 1432.65 307.472  24 
   2  -5   8 1452.34 273.194  10 
  -2   5  -8 1352.93 306.716  16 
   2   5   8 1180.14 258.024  21 
  -2   5  -8 1319.79 259.333  15 
   2   5   9 12655.4 918.044  21 
  -2   5  -9 11390.2 930.744  21 
   2  -5   9 10685.5 761.475  10 
  -2   5  -9 12627.8 922.242  16 
   2   5   9 10347.1 823.178  24 
  -2   5  -9 11518.7 812.855  15 
   2   5   9 12108.4 880.421  25 
  -2   5 -10 185.225 93.9678  21 
  -2   5 -10 223.105 119.083  15 
   2   5  10 209.808 108.947  21 
   2   5  10 107.328 49.7355  24 
   2  -5  10 303.506 152.170  10 
   2   5  10 142.719 118.203  25 
  -2   5 -10 271.001 128.071  16 
   2   5  11 582.758 168.440  21 
  -2   5 -11 795.131 207.694  15 
   2  -5  11 778.517 181.434  10 
   2   5  11 616.377 180.131  24 
   2   5  11 788.762 206.562  25 
  -2   5 -11 951.608 244.232  16 
   2   5  12 3831.48 433.024  21 
   2   5  12 3709.22 429.043  24 
  -2   5 -12 4516.29 495.237  15 
  -2   5 -12 4177.18 502.677  16 
   2  -5  12 4326.45 455.387  10 
   2   5  12 4243.65 480.854  25 
  -2   5 -13 550.266 165.933  15 
  -2   5 -13 644.898 175.014  16 
   2  -5  13 641.210 164.324  10 
  -2   5 -14 1142.74 232.487  15 
   2  -5  14 1070.73 219.309  10 
  -2   5 -14 1657.85 334.573  16 
   2  -5  15 857.051 182.162  10 
  -2   5 -15 803.080 177.563  15 
  -2   5 -15 671.316 137.602  19 
   2  -5  16 3633.68 379.794  10 
  -2   5 -16 3520.93 309.068  19 
  -2   5 -16 3540.69 379.717  15 
   2  -5  17 168.398 67.4985  10 
  -2   5 -17 159.827 64.7947  15 
  -2   5 -17 196.933 92.9618  22 
  -2   5 -17 212.264 81.5007  19 
   2  -5  18 476.621 123.761  10 
  -2   5 -18 390.462 87.5657  19 
  -2   5 -18 406.362 109.264  15 
  -2   5 -19 79.5808 44.4271  15 
   2  -5  19-12.0724 19.2618  10 
   2   6 -15 1892.44 238.386  15 
   2   6 -15 1219.61 205.233  11 
   2   6 -15 1572.19 225.270  22 
   2   6 -14 1024.64 191.264  22 
   2   6 -14 806.647 183.033  11 
   2   6 -14 1066.95 178.804  15 
  -2   6  14 647.790 157.872  24 
  -2   6  14 597.026 151.135  25 
   2   6 -13 599.434 145.082  15 
  -2   6  13 458.882 131.905  24 
   2   6 -13 617.975 168.666  22 
  -2   6  13 617.235 176.357  25 
   2   6 -13 678.542 179.060  11 
  -2   6  12 217.806 91.1848  24 
  -2  -6  12-0.55431 26.4704  13 
   2   6 -12 20.6016 29.0870  22 
   2   6 -12 128.927 67.5480  11 
  -2   6  12 166.160 68.0630  25 
   2   6 -12 124.644 48.4995  15 
  -2  -6  11 403.176 114.293  13 
   2   6 -11 653.594 187.932  22 
   2   6 -11 546.333 141.554  15 
  -2   6  11 533.030 171.031  24 
  -2   6  11 589.746 169.830  25 
  -2  -6  10 1113.77 187.717  13 
  -2   6  10 1558.14 275.414  21 
  -2   6  10 1460.17 270.559  25 
   2   6 -10 1611.99 259.528  15 
  -2   6  10 1157.27 254.988  24 
   2   6 -10 1429.88 281.030  22 
  -2   6   9 1035.58 242.609  25 
  -2   6   9 1055.73 265.560  24 
  -2   6   9 843.589 220.359  21 
   2   6  -9 1354.99 238.720  15 
   2   6  -9 1014.53 236.950  21 
   2   6  -9 903.529 234.300  22 
  -2   6   8 1849.83 346.005  25 
  -2   6   8 2676.36 388.960  21 
  -2   6   8 2672.59 404.827  24 
   2   6  -8 2613.81 392.175  16 
   2   6  -8 2374.27 358.570  21 
   2   6  -8 2589.39 336.827  15 
   2   6  -8 2045.72 324.626  22 
  -2   6   7 3560.45 493.254  25 
   2   6  -7 5488.55 576.112  21 
  -2   6   7 4800.16 571.768  24 
   2   6  -7 4840.95 533.717  16 
  -2   6   7 4655.72 547.172  21 
   2   6  -7 4066.17 427.533  15 
   2   6  -7 4096.49 494.751  22 
  -2   6   6 2360.01 400.458  25 
   2   6  -6 2814.59 449.742  21 
   2   6  -6 3084.61 362.255  15 
   2   6  -6 2521.87 383.041  22 
   2   6  -6 2787.94 412.409  16 
  -2   6   6 3190.11 480.299  21 
  -2   6   6 3179.70 464.678  24 
   2   6  -5 1934.13 345.469  22 
  -2   6   5 1945.77 378.054  25 
   2   6  -5 2160.09 350.629  16 
  -2   6   5 1781.18 275.233  16 
  -2   6   5 1748.51 350.197  24 
   2   6  -5 1932.98 293.963  15 
  -2   6   5 1957.61 376.715  21 
   2   6  -5 1884.96 367.294  21 
   2   6  -4 1544.99 314.664  21 
   2   6  -4 1827.15 299.478  22 
   2   6  -4 1737.57 277.253  15 
   2   6  -4 2073.53 374.845  24 
  -2   6   4 1587.33 360.998  21 
   2   6  -4 2320.65 363.426  16 
  -2   6   4 1995.01 366.456  25 
  -2   6   4 1739.52 360.639  24 
  -2   6   4 1927.24 299.319  16 
   2   6  -4 2022.43 373.404  25 
   2   6  -3 1553.49 334.048  24 
   2   6  -3 940.072 225.447  22 
   2   6  -3 1393.97 307.629  25 
  -2   6   3 1768.95 354.776  25 
   2   6  -3 1271.88 310.293  21 
  -2   6   3 1309.49 258.144  16 
   2   6  -3 1171.62 218.044  15 
  -2   6   3 1172.49 295.372  21 
  -2   6   3 1534.64 333.841  24 
   2   6  -3 1564.10 304.858  16 
  -2   6   2 1587.20 331.893  24 
   2   6  -2 2033.63 339.198  16 
   2   6  -2 1677.36 335.141  24 
   2   6  -2 1480.65 288.334  22 
  -2   6   2 1296.37 336.350  21 
  -2   6   2 1795.29 310.041  16 
  -2   6   2 1709.50 338.122  25 
   2   6  -2 2328.44 398.823  25 
   2   6  -2 1769.11 362.664  21 
   2   6  -1 4227.68 513.683  25 
   2   6  -1 2965.00 390.807  11 
   2   6  -1 2932.84 382.813  22 
  -2   6   1 2313.52 338.399  22 
   2   6  -1 4322.64 547.665  24 
  -2   6   1 2977.91 446.754  25 
  -2   6   1 3149.85 523.731  21 
   2   6  -1 3737.28 444.660  16 
   2   6  -1 3252.33 496.664  21 
  -2   6   1 3218.75 426.599  16 
  -2   6   1 3025.90 453.718  24 
   2  -6  -1 1916.51 325.882  10 
   2   6   0 6719.59 696.843  24 
  -2   6   0 5703.73 667.003  21 
  -2   6   0 6790.10 644.139  16 
   2   6   0 6400.99 704.506  21 
   2   6   0 6248.57 568.773  22 
  -2   6   0 6796.70 682.212  25 
   2   6   0 6619.08 670.890  25 
  -2   6   0 6686.91 693.480  24 
   2  -6   0 5189.68 500.335  10 
   2   6   0 5173.30 516.271  11 
  -2   6   0 4592.26 504.121  22 
   2   6   0 7117.11 609.572  16 
  -2   6  -1 1458.04 311.304  24 
   2   6   1 1683.09 268.336  22 
  -2   6  -1 1431.77 344.851  21 
   2   6   1 1527.64 319.181  25 
  -2   6  -1 1439.92 280.506  16 
   2   6   1 2007.06 380.963  21 
  -2   6  -1 1719.19 330.325  25 
   2   6   1 1464.96 258.191  11 
   2  -6   1 1445.02 249.386  10 
   2   6   1 1820.01 295.624  16 
   2   6   1 1001.74 258.348  24 
  -2   6  -2 6340.53 484.163  15 
   2   6   2 5448.26 636.354  21 
  -2   6  -2 6944.12 750.406  21 
   2  -6   2 5744.62 502.992  10 
  -2   6  -2 6233.60 627.122  16 
   2   6   2 7702.29 731.412  24 
  -2   6  -2 6294.60 649.168  24 
  -2   6  -2 6598.28 682.659  25 
   2   6   2 6144.47 535.631  16 
   2   6   2 6516.08 676.894  25 
  -2   6  -3 1447.24 298.310  16 
   2   6   3 1278.93 300.053  24 
  -2   6  -3 1644.06 325.503  24 
  -2   6  -3 1701.30 250.116  15 
   2   6   3 1713.19 361.358  21 
  -2   6  -3 1655.40 318.962  25 
  -2   6  -3 1529.21 327.844  21 
   2  -6   3 1612.96 250.773  10 
   2   6   3 1600.53 333.996  25 
   2   6   4 4227.71 559.179  21 
  -2   6  -4 3414.85 520.049  21 
   2   6   4 3437.86 474.381  25 
  -2   6  -4 3719.53 487.083  25 
  -2   6  -4 3677.10 485.232  16 
  -2   6  -4 3106.94 355.116  15 
   2  -6   4 3679.30 395.490  10 
  -2   6  -4 3767.24 486.713  24 
   2   6   4 3393.32 485.736  24 
   2   6   5 1287.67 295.274  24 
  -2   6  -5 1030.59 207.268  15 
  -2   6  -5 959.729 253.747  21 
  -2   6  -5 885.445 235.894  25 
   2   6   5 1247.11 286.897  21 
  -2   6  -5 1183.56 274.771  16 
   2  -6   5 727.630 177.573  10 
   2   6   5 1001.42 236.088  25 
  -2   6  -5 1097.23 246.109  24 
   2   6   6 789.897 242.157  21 
   2  -6   6 668.372 171.412  10 
  -2   6  -6 632.386 162.584  15 
  -2   6  -6 834.458 237.201  21 
  -2   6  -6 329.239 174.759  25 
   2   6   6 635.402 207.726  24 
  -2   6  -6 535.350 173.743  24 
   2   6   6 591.695 186.671  25 
  -2   6  -6 602.673 188.035  16 
  -2   6  -7 1063.25 205.869  15 
   2   6   7 1220.85 276.481  25 
   2   6   7 783.153 214.026  24 
  -2   6  -7 1235.05 268.699  16 
  -2   6  -7 1362.71 303.012  21 
   2   6   7 1221.49 274.640  21 
   2  -6   7 1236.32 215.772  10 
  -2   6  -8 7529.60 687.197  21 
  -2   6  -8 7724.99 584.293  15 
   2   6   8 7537.26 656.695  21 
   2   6   8 7331.54 669.551  24 
   2  -6   8 7908.04 571.432  10 
   2   6   8 6349.22 664.282  25 
  -2   6  -8 8367.52 702.673  16 
   2   6   9 1791.52 327.914  25 
  -2   6  -9 1831.20 280.544  15 
   2  -6   9 1856.02 265.925  10 
  -2   6  -9 1602.29 286.586  21 
   2   6   9 1589.43 291.568  24 
  -2   6  -9 1983.73 335.303  16 
   2   6   9 1845.06 302.269  21 
   2  -6  10 2899.45 330.779  10 
  -2   6 -10 3331.68 421.488  16 
   2   6  10 2629.35 346.223  24 
  -2   6 -10 3023.27 350.325  15 
   2   6  10 2903.25 366.218  21 
   2   6  10 2874.57 368.396  25 
   2   6  11 20.2400 41.5729  25 
   2   6  11-4.76012 26.9333  21 
  -2   6 -11 26.0463 29.6621  16 
   2   6  11 56.5324 71.0233  24 
  -2   6 -11 43.0454 33.0133  15 
   2  -6  11 130.788 82.2572  10 
  -2   6 -12 2591.84 307.170  15 
   2  -6  12 2632.91 294.288  10 
  -2   6 -12 2735.40 342.377  16 
  -2   6 -12 1872.11 292.804  22 
  -2   6 -13 1344.60 243.319  22 
   2  -6  13 1329.77 194.376  10 
  -2   6 -13 1696.41 234.777  15 
   2  -6  14 1437.45 193.593  10 
  -2   6 -14 1090.29 202.548  22 
  -2   6 -14 1374.57 202.553  15 
  -2   6 -15 201.553 77.9049  15 
   2   7  -8 718.070 160.204  22 
  -2   7   8 1131.57 193.964  25 
  -2   7   8 1221.30 195.935  24 
   2   7  -8 876.196 173.956  11 
  -2   7   7 1612.93 236.712  25 
   2   7  -7 1306.75 224.853  11 
  -2  -7   7 968.547 155.097  13 
   2   7  -7 1162.53 212.511  22 
  -2   7   6 1483.89 228.390  21 
  -2   7   6 1344.19 223.724  25 
   2   7  -6 894.175 195.075  11 
  -2  -7   6 744.792 139.684  13 
   2   7  -6 730.463 175.362  22 
  -2   7   6 1700.57 246.225  24 
   2   7  -5 1984.85 277.730  22 
   2   7  -5 2841.30 329.201  21 
   2   7  -5 1517.53 241.724  11 
  -2   7   5 2604.48 316.225  24 
  -2   7   5 2800.29 330.295  25 
  -2   7   5 3174.81 361.183  21 
  -2   7   4 2789.25 334.299  25 
   2   7  -4 1904.37 270.520  22 
   2   7  -4 1977.46 277.966  11 
  -2   7   4 3512.95 379.748  24 
   2   7  -4 3157.02 358.157  21 
  -2   7   4 2965.64 366.082  21 
   2   7  -3 2565.48 339.604  21 
   2   7  -3 1290.14 215.872  11 
   2   7  -3 1287.07 217.152  22 
  -2   7   3 2656.91 334.023  25 
  -2   7   3 2393.93 335.887  21 
  -2   7   3 2411.32 323.129  24 
  -2   7   2 2168.67 296.932  25 
   2   7  -2 2026.87 297.287  21 
  -2   7   2 2259.51 307.619  24 
  -2   7   2 2113.42 317.445  21 
  -2   7   1 2730.52 372.160  21 
  -2   7   1 3575.95 386.982  25 
   2   7  -1 3059.78 376.227  21 
  -2   7   1 3541.86 337.086  16 
  -2   7   1 3593.88 389.550  24 
  -2   7   0 3075.05 354.804  25 
  -2   7   0 2971.99 360.020  24 
  -2   7   0 3278.99 405.996  21 
   2   7   0 2777.79 368.210  21 
  -2   7   0 2863.74 310.393  16 
  -2   7  -1 2333.13 282.073  16 
   2   7   1 2933.61 367.738  21 
  -2   7  -1 1676.72 270.634  25 
  -2   7  -1 2279.51 305.875  24 
  -2   7  -1 2470.02 343.070  21 
  -2   7  -2 510.877 121.090  16 
   2   7   2 648.707 171.769  21 
  -2   7  -2 599.630 150.749  21 
  -2   7  -3 835.470 193.305  21 
  -2   7  -3 180.856 73.5386  11 
   2   7   3 582.120 166.683  21 
  -2   7  -3 146.600 65.3859  22 
  -2   7  -3 707.001 148.212  16 
  -2   7  -4 126.280 66.1560  22 
   2   7   4-85.0410 96.8705  21 
  -2   7  -4 69.7654 54.3132  16 
  -2   7  -4-65.7856 59.1874  11 
  -2   7  -4 131.052 94.9222  21 
  -2   7  -5-2.50813 22.6829  22 
  -2   7  -5 174.010 95.4181  21 
  -2   7  -5 202.884 86.2402  16 
   2   7   5 92.5417 77.5900  21 
  -2   7  -5 60.3659 39.6518  11 
  -2   7  -6 29.9262 41.3215  11 
  -2   7  -6 192.984 71.1214  16 
   2   7   6 127.009 66.8544  21 
  -2   7  -6-30.4585 35.7461  22 
  -3   0  27 215.080 94.8628  26 
  -3   0  27 370.275 99.1173  20 
  -3   0  26 46.0877 44.2402  26 
  -3   0  26-5.20093 16.4385   8 
  -3   0  26-41.9853 38.1549  20 
  -3   0  25 3459.56 493.076  26 
  -3   0  25 4293.09 435.951  20 
  -3   0  24-3.18622 45.3361  10 
  -3   0  24-47.1890 68.2116  26 
  -3   0  24 19.5726 54.1697  20 
  -3   0  23 3481.20 532.364  26 
  -3   0  23 3360.97 430.349  10 
  -3   0  23 3332.78 433.969  20 
  -3   0  22-39.4050 28.7758  10 
  -3   0  22-61.4310 25.6926  20 
  -3   0  21 945.053 230.599  20 
  -3   0  21 898.924 228.644  10 
  -3   0  20-71.7135 72.2299  10 
  -3   0  20 167.621 128.402  20 
  -3   0  19 4456.37 506.968  20 
  -3   0  19 4456.90 523.010  10 
  -3   0  18-12.7048 57.8123  20 
  -3   0  18-36.8870 71.3793  10 
  -3   0  17 3410.77 443.520  20 
  -3   0  17 4053.55 445.960  18 
  -3   0  17 4477.69 480.886  10 
  -3   0  16 6.73505 43.0035  13 
  -3   0  16 135.856 384.879   3 
  -3   0  16-207.076 247.378   2 
  -3   0  16 3.28206 56.0694  18 
  -3   0  16-46.4897 41.9508  20 
  -3   0  16 58.8027 55.8308  10 
  -3   0  15 5206.30 416.230  13 
  -3   0  15 5916.02 499.528  10 
  -3   0  15 5581.76 1316.16   3 
   3   0 -15 5115.71 731.917   1 
  -3   0  15 4806.11 483.002  20 
  -3   0  15 5576.76 464.771  18 
  -3   0  15 7180.19 1440.97   2 
  -3   0  14 132.885 100.866  20 
  -3   0  14-27.0894 164.354   3 
  -3   0  14 47.7613 191.142   2 
  -3   0  14-37.9178 45.6579  18 
  -3   0  14-6.97644 29.1267  10 
   3   0 -14 48.9163 98.0292   1 
  -3   0  14 53.4577 44.1920  13 
  -3   0  13 170950. 3939.05  10 
   3   0 -13 163149. 4879.23   1 
  -3   0  13 149528. 3909.67  20 
  -3   0  13 188797. 7381.90   3 
  -3   0  13 164624. 6949.48   2 
  -3   0  13 174684. 3873.01  18 
  -3   0  13 159930. 3718.76  13 
  -3   0  12 165.959 310.848   3 
  -3   0  12 3.40233 10.9978  18 
  -3   0  12 336.968 399.729   2 
  -3   0  12 33.4639 21.6229  10 
   3   0 -12 26.5207 79.1555   1 
   3   0 -11 2746.09 459.815   1 
  -3   0  11 2787.34 727.220   2 
  -3   0  11 2563.14 713.338   3 
  -3   0  10-62.7863 140.126   3 
   3   0 -10 44.9704 61.4626   1 
  -3   0  10 72.6027 118.190   2 
   3   0  -9 65120.3 2357.19   1 
  -3   0   9 66771.7 3310.52   3 
  -3   0   9 66706.7 3312.99   2 
  -3   0   8-7.60558 69.5656   2 
  -3   0   8-17.7712 145.685   3 
   3   0  -8-22.1409 19.2325   1 
   3   0  -7 92944.9 2736.08   1 
  -3   0   7 103910. 3848.56   2 
  -3   0   7 102591. 3794.04   3 
   3   0  -7 92452.2 2811.33   1 
   3   0  -6-9.82656 18.4951   1 
  -3   0   6-92.2439 28.1615   2 
   3   0  -6 28.6589 60.6609   1 
  -3   0   5 24733.3 1459.46   2 
   3   0  -5 20442.4 940.551   1 
  -3   0   5 24353.8 1456.46   3 
   3   0  -5 19887.5 975.427   1 
  -3   0   4 95.1049 52.8939   2 
  -3   0   4 20.1378 46.8854   1 
  -3   0   4 108.467 73.2626   3 
   3   0  -4 33.1303 42.3106   1 
  -3   0   3 999999. 17848.3   3 
  -3   0   3 971175. 17773.9   2 
  -3   0   2 54.2095 75.1240   2 
  -3   0   2 7.85315 15.7630   3 
   3   0  -2 66.6411 66.5703   1 
  -3   0   2 54.6527 46.8961   1 
   3   0  -2-27.8377 42.3360   5 
  -3   0   1 48372.6 1567.92   2 
   3   0  -1 49464.3 1499.33   3 
   3   0  -1 45973.7 1445.24   1 
   3   0  -1 44310.0 1448.00   2 
  -3   0   1 52612.8 1620.27   3 
  -3   0   1 45267.1 1582.67   5 
  -3   0   1 50512.0 1535.11   1 
   3   0  -1 46978.9 1540.03   5 
   3   0   0 15.4054 55.3904   1 
   3   0   0 74.6946 52.6369   3 
   3   0   0 48.2908 45.2662   2 
  -3   0   0 64.4229 38.5168   1 
  -3   0   0-16.1445 59.0298   5 
  -3   0  -1 15671.3 737.313   1 
   3   0   1 15215.5 745.289   4 
  -3   0  -1 15775.9 947.117   5 
   3   0   1 15568.2 717.372   1 
   3   0   2 8.62706 35.1244   1 
   3   0   2 31.2716 45.4694   4 
  -3   0  -2 1.27081 82.3078   5 
  -3   0  -2-41.1574 59.5768   4 
  -3   0  -2-24.7073 17.2775   1 
  -3   0  -3 389756. 8534.76   4 
  -3   0  -3 400144. 8372.29   1 
   3   0   4-20.3404 54.7927   1 
  -3   0  -4 8.64333 32.7202   4 
  -3   0  -4-48.5384 56.2674   1 
   3   0   4-8.06772 44.3482   4 
  -3   0  -5 11944.7 833.373   4 
   3   0   5 10750.7 654.144   1 
   3   0   5 11413.9 789.591   4 
  -3   0  -5 12606.0 742.208   1 
   3   0   6-20.2657 84.5694   4 
   3   0   6-29.0474 26.3767   1 
  -3   0  -6 16.5343 24.0520   1 
  -3   0  -7 108137. 3036.82   1 
   3   0   7 103380. 2887.37   1 
   3   0   8 40.6174 61.6539   1 
   3   0   9 93759.8 2842.22   1 
   3   0  10-11.8261 22.7226   1 
   3   0  10-8.28523 26.8027  12 
   3   0  10-32.9979 16.1288  18 
   3   0  11 21230.3 970.348  27 
   3   0  11 20591.0 910.006  18 
   3   0  11 18940.5 837.707  12 
   3   0  12 7.27357 25.6596  18 
   3   0  12 77.7544 126.984   2 
   3   0  12 21.0755 44.6129  23 
   3   0  12 90.2877 97.4778   1 
   3   0  12-4.10101 26.2675  10 
   3   0  12 94.5064 65.6799  12 
   3   0  12 46.9071 27.6461  27 
   3   0  13 5764.62 441.006  10 
   3   0  13 6551.74 502.709  18 
   3   0  13 5623.24 467.965  12 
   3   0  13 5415.75 1041.68   2 
   3   0  13 5724.82 1061.86   3 
   3   0  13 5493.09 448.590  23 
   3   0  13 6150.94 543.583  27 
   3   0  13 5898.52 655.564   1 
   3   0  14 42.3288 177.494   2 
   3   0  14-49.5071 67.2702  18 
   3   0  14-28.5099 185.385   3 
   3   0  14 20.1937 21.5632  10 
   3   0  14 20.9410 47.4276  23 
   3   0  14 58.0171 73.5524  27 
   3   0  14-7.77852 31.4601  12 
   3   0  15 9604.53 756.835  27 
   3   0  15 10283.4 698.561  18 
   3   0  15 9636.79 652.548  12 
   3   0  15 9498.71 1500.70   3 
   3   0  15 9846.97 650.537  10 
   3   0  15 8006.42 1408.44   2 
   3   0  15 11505.6 672.913  23 
   3   0  16-8.86790 24.5928  23 
   3   0  16 5.86928 33.3804  27 
   3   0  16-6.52570 74.2468  18 
   3   0  16-28.3125 33.4706  12 
   3   0  16 37.9579 30.0997  10 
   3   0  17 8580.16 762.695  27 
   3   0  17 9940.30 683.917  10 
   3   0  17 9629.45 706.573  18 
   3   0  17 8916.22 675.726  12 
   3   0  18 1.01257 18.2935  18 
   3   0  18-2.94292 42.5092  10 
   3   0  19 50523.3 1833.96  18 
   3   0  19 46165.1 1758.76  10 
  -3   0 -20 118.618 118.203   9 
   3   0  20 85.9968 93.4432  10 
   3   0  20-4.09360 31.8081  18 
  -3   0 -21 9809.15 732.094   9 
   3   0  21 10115.5 719.354  18 
   3   0  21 8729.89 674.554  10 
   3   0  22 39.3575 27.5445  18 
   3   0  22 19.8195 44.3016  10 
   3   0  22 49.7318 35.5465  20 
   3   0  23 147.494 123.648  20 
   3   0  23 209.240 104.187  18 
   3   0  23 143.953 88.6557  10 
   3   0  24-35.3865 54.7079  20 
   3   0  24 43.7882 48.9715  10 
   3   0  25 220.275 90.3607  20 
   3   0  26-8.30680 36.2842  20 
  -3  -1  27 698.623 136.132   8 
  -3  -1  27 717.539 185.450  26 
  -3  -1  26 317.181 98.4945  20 
  -3  -1  26 126.638 65.9755  10 
  -3   1  26 202.544 108.709  26 
  -3  -1  26 222.377 133.724  26 
  -3   1  26 324.645 97.8867  20 
  -3   1  25 412.674 131.136  20 
  -3  -1  25 476.469 138.340  10 
  -3   1  25 504.124 164.920  26 
   3   1 -25 384.510 94.7233  19 
  -3  -1  25 381.828 168.167  26 
  -3  -1  25 364.356 124.236  20 
  -3  -1  24 439.790 138.905  10 
  -3  -1  24 397.925 121.526  20 
  -3   1  24 480.511 160.138  20 
  -3   1  24 327.846 145.789  26 
   3   1 -24 427.364 117.120  19 
  -3   1  24 285.925 97.2114   8 
  -3  -1  23 432.364 147.793  20 
  -3   1  23 464.100 132.568   8 
  -3   1  23 502.660 166.309  20 
  -3   1  23 331.405 162.421  26 
  -3  -1  23 485.420 145.463  10 
   3   1 -23 372.249 117.425  19 
  -3   1  22 672.093 250.368  26 
  -3  -1  22 670.292 189.205  20 
  -3   1  22 337.852 124.769  20 
  -3  -1  22 694.324 199.746  10 
  -3   1  21 4150.63 511.272  20 
  -3   1  21 4286.04 597.583  26 
  -3  -1  21 3913.05 487.722  10 
  -3   1  21 3821.88 484.661  10 
  -3  -1  21 3847.17 473.945  20 
  -3   1  20 4734.84 543.016  10 
  -3   1  20 4482.64 526.768  20 
  -3   1  20 3996.62 591.009  26 
  -3  -1  20 5137.98 549.529  10 
  -3  -1  20 4287.44 506.788  20 
  -3   1  19 3995.76 578.373  26 
  -3   1  19 3694.80 478.960  20 
  -3  -1  19 3409.61 452.486  20 
  -3  -1  19 4282.77 488.299  10 
  -3   1  19 4686.77 533.696  10 
  -3   1  18-49.9822 64.3340  20 
  -3  -1  18-39.4484 67.9101  20 
  -3   1  18 46.7078 89.7536  10 
  -3   1  18 25.9198 25.5390  18 
  -3   1  18 128.257 137.107  26 
  -3  -1  18 48.0004 72.0481  10 
  -3   1  17 615.855 238.904  26 
  -3   1  17 726.526 205.260  20 
  -3  -1  17 776.613 200.494  20 
  -3  -1  17 773.992 196.461  10 
  -3   1  17 770.677 190.407  18 
  -3   1  17 783.683 218.916  10 
  -3  -1  16 2856.38 376.079  20 
  -3  -1  16 3262.39 318.129  13 
  -3   1  16 2869.13 400.406  20 
   3   1 -16 2549.46 645.093   1 
  -3  -1  16 3349.10 391.205  10 
  -3   1  16 3843.89 401.270  18 
  -3   1  16 2997.75 398.716  10 
  -3  -1  15 1955.96 295.941  20 
  -3  -1  15 2464.02 319.690  10 
  -3   1  15 2046.47 316.375  10 
  -3   1  15 2011.04 837.676   2 
  -3   1  15 2301.73 295.420  18 
  -3  -1  15 2675.50 952.622   3 
  -3   1  15 2302.62 926.692   3 
  -3   1  15 2120.03 341.854  20 
   3   1 -15 2085.55 590.198   1 
  -3  -1  15 2433.78 268.274  13 
  -3  -1  15 2433.32 921.460   2 
  -3  -1  14 1037.61 196.870  10 
  -3   1  14 1007.86 189.651  18 
  -3  -1  14 862.575 155.861  13 
  -3   1  14 776.531 496.254   2 
  -3   1  14 471.541 142.075  13 
  -3   1  14 285.892 139.702   3 
  -3   1  14 743.990 186.518  10 
   3   1 -14 703.724 329.679   1 
  -3   1  14 868.198 197.104  20 
   3   1 -13 2391.43 511.377   1 
  -3   1  13 2315.22 331.135  25 
  -3  -1  13 3315.16 301.185  13 
  -3  -1  13 2856.30 305.883  18 
  -3   1  13 2788.18 338.023  20 
  -3   1  13 3056.49 865.284   3 
  -3   1  13 2644.26 356.859  24 
  -3   1  13 3381.20 924.205   2 
  -3   1  13 2059.82 273.054  13 
  -3   1  13 2928.47 298.924  18 
  -3  -1  13 3299.51 334.816  10 
  -3   1  13 2567.80 327.327  10 
  -3   1  12 23096.8 884.251  18 
  -3  -1  12 21461.9 880.596  18 
  -3   1  12 20233.8 953.042  20 
  -3   1  12 20029.4 2246.34   3 
  -3   1  12 18154.0 826.518  13 
  -3   1  12 19798.5 938.497  10 
  -3   1  12 18654.5 2173.03   2 
   3  -1 -12 19784.7 1113.59   1 
  -3  -1  12 21065.3 892.698  10 
   3   1 -12 20634.7 1586.43   1 
  -3   1  11 12170.2 681.462  10 
   3  -1 -11 12104.3 832.199   1 
   3   1 -11 12516.2 1169.03   1 
  -3   1  11 13211.8 1708.20   2 
  -3  -1  11 12938.5 641.284  10 
  -3  -1  11 12526.2 615.260  18 
  -3   1  11 14712.3 1795.16   3 
  -3   1  11 12235.7 680.220  20 
   3   1 -10 35493.8 1937.39   1 
   3  -1 -10 36702.9 1478.92   1 
  -3   1  10 37947.8 2846.18   2 
  -3   1  10 35875.1 2747.09   3 
  -3   1   9 163359. 6124.52   2 
   3   1  -9 147470. 4531.93   1 
  -3   1   9 150230. 5946.30   3 
   3  -1  -9 153882. 3830.18   1 
   3  -1  -9 150883. 4022.16   5 
   3  -1  -9 142139. 3748.59   1 
  -3   1   8 5306.17 955.213   3 
   3  -1  -8 4552.56 434.454   1 
   3  -1  -8 4222.24 433.756   5 
   3   1  -8 4300.74 585.077   1 
   3  -1  -8 3821.95 397.499   1 
  -3   1   8 4519.31 914.838   2 
   3  -1  -7 27681.5 1150.10   1 
   3   1  -7 25913.0 1452.56   1 
  -3   1   7 28394.5 2086.19   2 
  -3   1   7 29899.5 2132.72   3 
   3  -1  -7 32684.6 1207.77   1 
   3  -1  -7 26195.7 1024.68   5 
   3   1  -6 13205.4 944.129   1 
   3  -1  -6 13777.0 748.017   1 
  -3   1   6 13758.8 1380.94   2 
  -3   1   6 13503.5 790.763   1 
  -3   1   6 13273.1 1364.60   3 
  -3   1   5 14452.3 1331.59   2 
  -3   1   5 12407.6 1262.42   3 
   3  -1  -5 14351.0 751.966   1 
  -3   1   5 15794.4 825.708   1 
   3   1  -5 13951.0 930.780   1 
   3   1  -4 18391.3 961.561   1 
   3  -1  -4 17803.8 843.803   1 
   3  -1  -4 17631.3 1406.25   3 
  -3   1   4 18487.8 1452.99   3 
   3   1  -4 17561.6 992.324   1 
   3  -1  -4 15300.7 1300.52   2 
  -3   1   4 18343.1 900.089   1 
  -3   1   4 19613.2 1494.06   2 
   3   1  -3 46879.3 1741.82   1 
   3  -1  -3 52857.6 1641.16   1 
  -3   1   3 52988.2 1702.50   1 
   3  -1  -3 53383.4 2441.20   2 
   3   1  -3 53280.2 1736.92   1 
   3  -1  -3 49051.9 2362.50   3 
   3  -1  -2 5232.21 708.124   2 
  -3   1   2 6382.04 492.130   1 
   3   1  -2 5367.81 439.012   1 
   3  -1  -2 6187.44 462.570   1 
   3  -1  -2 5068.83 704.042   3 
   3   1  -2 5270.37 463.126   1 
  -3   1   1 247374. 5315.54   1 
   3   1  -1 248822. 5107.50   1 
   3   1  -1 241746. 5191.70   1 
   3  -1  -1 215338. 5096.63   1 
   3  -1  -1 194092. 5987.91   2 
   3  -1  -1 220597. 6182.07   3 
   3  -1  -1 229950. 5029.12   4 
   3   1  -1 194234. 5815.48   5 
   3  -1   0 66152.2 2001.41   1 
   3   1   0 68099.4 1929.76   1 
   3   1   0 71101.2 2692.16   5 
   3  -1   0 67975.6 1940.70   4 
   3   1   0 64802.0 1827.12   1 
  -3  -1  -1 69664.7 1979.78   2 
  -3  -1  -1 62000.7 1894.47   1 
   3   1   1 75632.8 1998.82   4 
  -3  -1  -1 72629.4 2004.10   3 
   3  -1   1 69676.6 2065.82   4 
   3   1   1 61485.8 2608.94   5 
   3  -1   1 77537.4 2198.09   1 
  -3   1  -1 72821.6 2229.87   1 
  -3   1  -1 79448.9 2170.66   4 
   3   1   1 74703.7 1951.85   1 
  -3  -1  -2 33928.7 1178.31   2 
   3  -1   2 38985.9 1408.35   4 
  -3  -1  -2 30704.9 1099.52   1 
  -3   1  -2 35053.8 1391.17   4 
  -3  -1  -2 28915.8 1775.94   5 
   3  -1   2 35138.1 1388.97   1 
  -3   1  -2 34985.4 1438.97   1 
  -3  -1  -2 36060.9 1211.96   3 
   3   1   2 37813.7 1874.25   5 
   3   1   2 34335.5 1111.52   1 
   3   1   2 39850.6 1279.47   4 
   3   1   3 41470.6 1376.01   4 
  -3   1  -3 37668.2 1534.40   4 
  -3  -1  -3 31982.3 1101.41   1 
  -3   1  -3 40226.5 1593.91   1 
  -3  -1  -3 33819.5 1992.35   5 
   3   1   3 39751.6 1163.77   1 
   3  -1   3 37901.8 1496.75   1 
   3  -1   3 40711.4 1560.61   4 
   3   1   3 41620.1 2042.11   5 
   3   1   4 96.2091 50.7345   1 
   3  -1   4 230.739 110.949   1 
   3  -1   4 194.965 135.231   4 
  -3  -1  -4 144.694 61.0549   1 
   3   1   4 157.027 67.4709   4 
  -3  -1  -4 89.5479 67.1285   4 
   3   1   4 62.0273 41.9597   2 
   3   1   4-7.76878 68.7589   3 
  -3   1  -4 31.0486 30.3491   4 
   3  -1   5 101593. 2889.43   1 
   3  -1   5 98306.8 2954.46   4 
  -3  -1  -5 90233.4 2157.50   1 
   3   1   5 90960.2 3000.66   2 
   3   1   5 94139.1 2636.36   4 
  -3  -1  -5 95349.8 2698.12   4 
   3   1   5 94076.7 3036.23   3 
   3  -1   6 32490.4 1530.42   1 
   3  -1   6 34203.7 1663.50   4 
   3   1   6 34463.4 1461.48   4 
  -3  -1  -6 32701.1 1038.34   1 
   3   1   6 34252.6 1011.04   1 
   3   1   6 32908.5 1768.98   3 
   3   1   6 31818.1 1739.17   2 
  -3  -1  -6 32739.1 1458.33   4 
  -3  -1  -7 12879.2 577.845   1 
   3  -1   7 12498.3 925.971   1 
   3   1   7 12638.8 880.900   4 
   3   1   7 12235.8 1118.98   3 
   3   1   7 11875.4 530.787   1 
   3   1   7 11077.5 1064.97   2 
   3  -1   8 2706.40 444.554   1 
   3   1   8 2297.91 517.763   2 
   3   1   8 2222.53 513.880   3 
   3   1   8 3206.42 260.493   1 
  -3  -1  -8 2484.73 246.281   1 
   3   1   9 15273.8 630.826   1 
   3   1   9 16324.6 1470.32   3 
   3   1   9 17320.0 1498.65   2 
   3  -1   9 15410.4 1124.29   1 
   3   1  10 19067.6 841.820  18 
   3   1  10 13010.7 594.353   1 
   3   1  10 13932.8 1448.28   2 
   3   1  10 15841.0 705.992  12 
   3  -1  10 14990.6 678.816  10 
   3   1  10 16275.8 793.494  27 
   3   1  10 13149.5 1408.01   3 
   3  -1  10 15668.7 743.906  23 
   3  -1  10 17564.2 1254.95   1 
   3  -1  10 13870.3 774.297  27 
   3  -1  10 14702.8 686.748  12 
   3   1  11 8665.47 1228.19   2 
   3   1  11 9533.78 544.863  12 
   3  -1  11 9240.05 556.279  18 
   3  -1  11 9424.93 552.959  12 
   3   1  11 9408.14 600.871  18 
   3  -1  11 8964.83 533.707  10 
   3   1  11 10003.5 634.044  27 
   3  -1  11 8717.87 570.416  23 
   3   1  11 7316.23 1122.24   3 
   3  -1  11 9383.83 948.336   1 
   3  -1  11 8326.56 619.951  27 
   3   1  12 1298.84 527.153   3 
   3  -1  12 1579.18 224.724  10 
   3  -1  12 1423.99 266.626  27 
   3   1  12 1175.33 517.529   2 
   3  -1  12 1505.43 235.359  23 
   3   1  12 1412.27 216.910  10 
   3  -1  12 1468.33 372.666   1 
   3   1  12 1579.03 226.426  12 
   3  -1  12 1619.28 227.690  12 
   3  -1  12 1600.60 225.529  18 
   3   1  12 1604.70 259.361  27 
   3   1  12 1831.56 267.575  18 
   3   1  13 1728.73 687.630   2 
   3  -1  13 1828.82 267.569  23 
   3   1  13 1686.19 268.069  18 
   3  -1  13 1398.64 280.778  27 
   3  -1  13 1448.73 377.711   1 
   3  -1  13 1757.68 248.066  18 
   3   1  13 1293.06 581.911   3 
   3  -1  13 1586.06 238.336  10 
   3   1  13 1257.45 215.285  10 
   3  -1  13 1496.21 232.795  12 
   3   1  13 1711.17 248.074  12 
   3   1  13 1875.27 283.419  27 
   3  -1  14 2481.01 318.174  23 
   3   1  14 2790.68 341.399  18 
   3   1  14 2025.46 687.558   3 
   3   1  14 2664.35 365.196  27 
   3   1  14 2728.30 327.619  12 
   3   1  14 2111.24 281.625  10 
   3  -1  14 2386.95 299.203  12 
   3  -1  14 2188.70 356.555  27 
   3  -1  14 2424.30 297.981  10 
   3   1  14 1755.60 606.234   2 
   3  -1  14 2256.63 521.154   1 
   3  -1  14 2505.12 303.435  18 
   3  -1  15 8495.78 599.365  10 
  -3   1 -15 7438.06 531.784  15 
   3   1  15 8909.86 656.024  18 
   3  -1  15 8409.12 607.444  12 
   3  -1  15 7349.24 947.409   1 
   3  -1  15 8365.56 606.182  18 
   3   1  15 7595.46 576.982  12 
   3   1  15 9264.97 703.516  27 
   3   1  15 7699.41 576.487  10 
   3  -1  16 2841.31 353.085  18 
   3  -1  16 2906.45 366.083  12 
   3   1  16 3090.92 385.384  18 
   3   1  16 2395.51 371.434  26 
   3   1  16 2292.05 313.125  10 
   3   1  16 2903.10 400.171  27 
   3  -1  16 3070.61 364.739  10 
  -3   1 -17 4587.57 552.829   9 
   3   1  17 3494.75 449.763  26 
   3  -1  17 4205.67 459.818  12 
   3   1  17 3503.43 396.481  10 
   3   1  17 4547.24 484.334  18 
   3  -1  17 4816.13 470.856  18 
   3  -1  17 4065.33 438.886  10 
   3   1  17 4767.59 519.179  27 
   3   1  18 3304.97 400.473  10 
   3   1  18 3398.48 414.146  18 
  -3   1 -18 4359.89 526.146   9 
   3  -1  18 4293.02 444.164  18 
   3  -1  18 4348.18 463.522  10 
   3   1  18 3422.33 481.681  27 
   3   1  18 3377.69 437.915  26 
  -3   1 -19 1365.43 294.350   9 
   3   1  19 1403.02 288.947  27 
   3   1  19 1601.29 288.669  18 
   3  -1  19 1656.66 276.305  18 
   3   1  19 1265.44 237.912  10 
   3  -1  19 1367.58 257.484  10 
  -3   1 -20 816.372 225.598   9 
   3   1  20 634.786 172.521  10 
   3  -1  20 786.876 206.282  10 
   3  -1  20 997.539 208.150  18 
   3   1  20 564.087 186.287  20 
   3   1  20 796.585 207.301  18 
   3  -1  21 444.299 154.054  10 
   3  -1  21 595.351 170.104  18 
   3   1  21 552.758 167.952  18 
   3   1  21 440.374 188.350  20 
  -3   1 -21 437.011 148.436   9 
   3   1  21 421.860 147.409  10 
   3  -1  22 1345.85 249.479  18 
   3  -1  22 1091.09 211.412  10 
   3   1  22 1116.76 244.870  20 
  -3   1 -22 1069.69 248.665   9 
   3   1  22 1439.00 255.156  18 
   3   1  23 2665.51 331.205  18 
   3  -1  23 2377.68 314.233  10 
   3  -1  23 1737.14 306.552  20 
   3   1  23 1911.44 308.513  20 
   3  -1  24 186.033 101.944  20 
   3   1  24 418.415 135.467  20 
   3   1  24 208.549 91.3576  18 
   3  -1  24 205.273 89.5186  10 
   3  -1  25 2647.10 318.919  20 
   3   1  25 2233.21 291.077  20 
   3  -1  25 2293.34 266.254  10 
   3   1  26 21.8672 16.7748  20 
  -3  -2  26 186.263 83.9613  10 
  -3  -2  26 122.881 57.1526  26 
  -3   2  26 161.410 77.7933  20 
  -3  -2  25 57.0045 31.9799  10 
  -3   2  25 183.638 103.842  26 
   3   2 -25 97.2329 49.6490  19 
  -3   2  25 173.442 84.8324  20 
  -3   2  24 303.303 131.987  26 
   3   2 -24 397.991 109.873  19 
  -3   2  24 433.390 146.572  20 
  -3  -2  24 508.930 147.840  10 
  -3  -2  23 1027.72 230.723  10 
  -3   2  23 1076.76 255.744  26 
  -3   2  23 1122.74 231.329  20 
   3   2 -23 1206.03 199.973  19 
  -3   2  22 185.690 97.5112  26 
  -3  -2  22 311.998 131.210  10 
  -3   2  22 216.045 108.096  20 
  -3  -2  21 4164.23 480.733  10 
  -3   2  21 3871.23 554.139  26 
  -3   2  21 4275.79 497.070  20 
  -3  -2  20 4742.24 474.377  20 
  -3  -2  20 5526.25 558.350  10 
  -3   2  20 5882.77 597.152  20 
  -3   2  20 4529.08 620.845  26 
  -3  -2  19 2715.04 366.210  20 
  -3   2  19 3239.64 445.719  20 
  -3  -2  19 2961.05 406.932  10 
  -3   2  19 2292.29 450.593  26 
  -3   2  18 9738.38 776.357  20 
  -3  -2  18 12067.3 813.945  10 
  -3   2  18 9888.23 934.739  26 
  -3  -2  18 9206.08 686.928  20 
   3   2 -17 10057.7 767.350   9 
  -3   2  17 9970.13 628.194   8 
  -3   2  17 10199.4 691.973  18 
  -3  -2  17 8612.68 642.865  20 
  -3  -2  17 10335.3 734.852  10 
  -3   2  17 9167.92 877.261  26 
  -3   2  17 11505.4 834.895  20 
   3   2 -16 1922.62 311.650   9 
  -3   2  16 1712.71 236.843   8 
  -3  -2  16 2009.79 262.344  13 
   3   2 -16 1879.85 261.826  15 
  -3  -2  16 1640.13 254.026  20 
  -3   2  16 1644.77 287.646  20 
  -3   2  16 2079.81 292.356  18 
  -3   2  16 1497.63 358.590  26 
  -3  -2  16 2259.89 324.858  10 
  -3  -2  15 871.004 189.208  10 
   3   2 -15 671.488 150.450  15 
  -3   2  15 607.297 181.696  20 
   3   2 -15 780.564 203.054   9 
  -3   2  15 734.757 156.698   8 
  -3   2  15 434.502 131.390  18 
  -3   2  15 790.057 193.978  24 
  -3  -2  15 704.920 161.005  13 
  -3   2  15 567.467 199.226  26 
  -3   2  15 629.029 182.343  25 
  -3   2  14 1328.09 867.830   2 
   3   2 -14 2543.05 695.028   1 
  -3   2  14 2612.63 303.807  18 
  -3   2  14 1780.22 312.476  24 
  -3  -2  14 2928.41 349.103  10 
  -3   2  14 2354.34 365.003  25 
   3   2 -14 2517.50 290.185  15 
  -3   2  14 3022.46 388.077  20 
  -3   2  14 1985.15 403.244  26 
   3   2 -14 2536.16 359.922   9 
  -3   2  14 2304.50 1007.76   3 
  -3   2  14 2289.21 273.950   8 
  -3  -2  14 2544.73 288.056  13 
  -3   2  13 10471.8 598.326   8 
   3   2 -13 11374.2 638.333  15 
  -3  -2  13 11808.3 631.716  13 
  -3   2  13 10863.8 760.992  25 
  -3   2  13 9768.91 838.694  26 
   3   2 -13 10889.7 736.520   9 
  -3   2  13 9542.50 577.296  18 
  -3  -2  13 12557.5 708.713  10 
   3   2 -13 10389.1 1329.13   1 
  -3   2  13 9928.46 1906.54   3 
  -3   2  13 7841.26 1725.62   2 
  -3   2  13 11819.9 760.471  20 
  -3   2  13 10880.2 791.397  24 
  -3   2  12 10202.8 741.352  24 
  -3   2  12 11200.8 584.128  18 
  -3   2  12 9742.32 553.007   8 
  -3   2  12 11261.0 758.228  25 
  -3   2  12 13751.5 2069.00   3 
   3   2 -12 11297.4 626.170  15 
  -3  -2  12 10666.9 636.455  10 
  -3   2  12 13257.4 763.998  20 
  -3   2  12 9662.04 790.652  26 
  -3  -2  12 11013.5 597.520  13 
   3   2 -12 10262.7 702.309   9 
   3   2 -12 11424.0 1302.38   1 
  -3   2  12 8297.99 1755.75   2 
   3   2 -11 2188.04 256.248  15 
   3   2 -11 2597.40 328.214   9 
  -3   2  11 2026.32 329.776  24 
   3   2 -11 2560.01 290.122  16 
   3   2 -11 1746.82 499.423   1 
  -3  -2  11 2432.37 272.792  10 
  -3   2  11 2405.27 245.384  18 
  -3   2  11 2178.71 285.703  20 
  -3  -2  11 2337.95 256.482  13 
  -3   2  11 1439.85 649.809   2 
  -3   2  11 2110.78 331.611  25 
  -3   2  11 2345.56 356.762  26 
  -3   2  11 2033.51 751.890   3 
  -3  -2  10 5267.67 394.263  13 
  -3   2  10 4900.80 427.827  20 
   3   2 -10 5644.35 854.675   1 
  -3   2  10 5718.30 554.633  26 
   3   2 -10 6206.23 429.008  15 
  -3   2  10 6768.51 558.155  24 
  -3   2  10 6495.76 552.652  25 
   3   2 -10 6580.65 465.980  16 
   3   2 -10 5469.66 467.222   9 
  -3  -2  10 6607.30 441.526  10 
   3   2  -9 10241.1 540.581  15 
  -3   2   9 7591.40 519.488  20 
   3   2  -9 10600.7 586.600  16 
  -3   2   9 9309.65 699.613  26 
   3  -2  -9 7366.21 484.842   1 
  -3  -2   8 1602.42 373.290   1 
   3  -2  -8 1570.57 213.648   1 
   3  -2  -7 2579.82 295.537   1 
  -3  -2   7 2884.59 460.435   1 
  -3   2   7 2185.16 323.671   1 
  -3  -2   6 2691.19 434.306   1 
  -3   2   6 2323.82 328.631   1 
   3  -2  -6 2492.98 297.315   1 
  -3   2   5 5144.89 509.998   1 
   3  -2  -5 5018.40 350.382   4 
   3  -2  -5 5387.10 457.841   1 
  -3  -2   5 5274.85 597.614   1 
  -3   2   5 6277.03 523.168   5 
  -3   2   4 799.695 199.332   1 
  -3   2   4 483.815 135.843   5 
   3  -2  -4 741.067 119.409   4 
   3  -2  -4 570.085 151.217   1 
   3   2  -3 7038.80 693.713   1 
   3  -2  -3 7265.17 421.415   4 
   3  -2  -3 7569.59 591.391   1 
  -3   2   3 7331.10 626.565   1 
  -3   2   3 7544.59 691.553   5 
   3  -2  -2 14141.2 662.989   4 
   3   2  -2 15591.9 997.465   1 
   3  -2  -2 17750.5 945.525   1 
  -3   2   2 17801.3 1034.15   1 
   3   2  -1 8042.59 1055.51   5 
   3  -2  -1 9039.97 548.799   4 
   3  -2  -1 7958.22 640.136   1 
   3   2  -1 9036.85 707.137   1 
   3   2  -1 7671.36 610.979   1 
   3   2   0 19769.2 1659.37   5 
   3  -2   0 17432.3 1020.26   1 
   3  -2   0 20803.6 925.764   4 
   3   2   0 15698.8 861.661   1 
   3   2   0 18244.0 970.249   1 
   3  -2   1 51403.7 1810.33   4 
  -3   2  -1 50848.0 1821.17   4 
   3   2   1 58263.7 1655.08   4 
   3  -2   1 54401.0 2065.29   1 
   3   2   1 61916.0 1877.65   1 
   3   2   1 54552.9 2912.82   5 
   3   2   1 62437.4 1814.13   1 
   3   2   2 54914.5 2882.68   5 
   3   2   2 55291.5 1684.64   1 
   3  -2   2 53098.2 2082.02   1 
   3   2   2 56315.1 1620.02   1 
   3  -2   2 57280.8 1950.39   4 
  -3   2  -2 49082.8 1894.96   4 
  -3  -2  -2 52131.4 2479.66   3 
  -3  -2  -2 49944.1 2433.28   2 
   3   2   2 57930.4 1598.67   4 
   3  -2   3 35388.6 1660.76   1 
   3  -2   3 38603.0 1592.35   4 
   3   2   3 39059.0 1197.29   4 
   3   2   3 34759.6 2268.96   5 
  -3  -2  -3 32555.8 1871.92   3 
   3   2   3 36896.6 1118.45   1 
  -3  -2  -3 30945.1 1829.99   2 
   3   2   3 29358.4 1014.11   1 
  -3  -2  -4 10533.0 997.378   2 
   3   2   4 8931.27 308.221   1 
  -3  -2  -4 11015.5 1027.89   3 
   3   2   4 12460.7 1305.68   5 
   3   2   4 12386.0 602.976   4 
   3  -2   4 11079.2 893.675   1 
   3   2   5 6350.73 971.921   5 
   3  -2   5 5429.00 659.725   1 
   3   2   5 6833.37 485.976   4 
  -3  -2  -5 4854.81 695.848   3 
  -3  -2  -5 5619.40 753.120   2 
   3  -2   6 4823.26 629.119   1 
   3  -2   7 48664.0 2311.22   1 
  -3   2  -7 53780.0 1711.70   9 
   3  -2   8 21802.6 910.922  23 
  -3   2  -8 23157.4 1047.59   9 
   3  -2   8 20924.3 1477.43   1 
   3  -2   8 21961.5 879.303  10 
   3  -2   9 3000.58 312.444  23 
   3   2   9 2992.32 322.036  18 
  -3   2  -9 3629.63 394.605   9 
   3  -2   9 2715.39 539.933   1 
   3   2   9 2848.97 269.288  12 
   3  -2   9 2981.92 301.470  10 
  -3   2 -10 3615.08 410.901   9 
   3  -2  10 3536.50 360.049  23 
   3  -2  10 3419.03 631.419   1 
   3  -2  10 3284.60 309.732  12 
   3   2  10 3447.82 355.607  18 
   3   2  10 3371.81 308.625  12 
   3  -2  10 3651.33 346.786  10 
   3  -2  11 4464.34 414.679  23 
   3  -2  11 4391.07 363.738  12 
   3   2  11 4734.37 433.175  27 
   3   2  11 3819.98 388.235  18 
   3  -2  11 4535.30 751.226   1 
   3  -2  11 4531.82 402.257  10 
   3  -2  11 3998.34 335.764  18 
  -3   2 -11 4201.17 468.271   9 
   3  -2  12 10995.2 703.040  23 
   3  -2  12 9256.92 1129.74   1 
   3  -2  12 10218.0 605.191  12 
   3   2  12 11433.6 721.023  27 
   3  -2  12 9887.70 567.260  18 
   3   2  12 10609.4 669.347  18 
  -3   2 -12 10491.1 785.098   9 
   3  -2  12 11033.4 662.877  10 
  -3   2 -13 22040.2 1191.76   9 
   3   2  13 21113.5 1011.54  18 
  -3   2 -13 20184.8 991.222  15 
   3  -2  13 18474.0 855.228  18 
   3  -2  13 21545.9 951.413  12 
   3   2  13 22895.9 1114.48  27 
   3  -2  13 20551.0 1702.82   1 
   3  -2  13 20130.4 973.379  10 
  -3   2 -14 13175.7 944.197   9 
   3  -2  14 13275.8 713.350  18 
   3   2  14 12100.2 768.028  18 
   3   2  14 14951.1 886.014  27 
   3  -2  14 13386.1 787.226  10 
  -3   2 -14 12937.0 786.187  15 
   3  -2  14 13448.3 745.243  12 
   3  -2  15 4047.49 404.264  12 
  -3   2 -15 4165.78 519.977   9 
   3   2  15 3857.47 431.843  18 
   3  -2  15 3963.68 382.739  18 
  -3   2 -15 3888.27 420.269  15 
   3  -2  15 4241.44 440.738  10 
   3   2  15 4586.23 493.410  27 
   3   2  16 7715.37 620.033  18 
   3   2  16 7776.80 662.337  27 
  -3   2 -16 7433.48 718.603   9 
  -3   2 -16 7142.27 580.804  15 
   3  -2  16 7239.88 541.395  18 
   3  -2  16 7474.88 611.680  10 
   3  -2  16 6799.72 545.224  12 
   3   2  16 5196.22 547.519  20 
   3  -2  17 896.304 187.716  10 
   3  -2  17 923.730 187.792  12 
   3   2  17 857.995 208.913  20 
  -3   2 -17 1030.90 277.797   9 
   3   2  17 944.879 219.533  27 
  -3   2 -17 888.555 197.294  15 
   3  -2  17 852.417 184.148  18 
   3   2  17 762.551 206.226  18 
   3  -2  18 5483.21 481.435  18 
   3  -2  18 5284.03 520.434  10 
  -3   2 -18 5404.74 493.283  15 
   3   2  18 5704.06 556.113  27 
   3   2  18 5150.58 554.013  20 
   3   2  18 5766.68 539.916  18 
  -3   2 -18 5381.54 623.507   9 
   3   2  19 4537.47 516.446  20 
   3  -2  19 4292.36 472.944  10 
   3   2  19 4523.13 464.825  18 
  -3   2 -19 5078.67 606.466   9 
   3   2  20 1884.82 330.976  20 
   3   2  20 2793.55 355.288  18 
   3  -2  20 2584.20 355.284  10 
  -3   2 -20 2749.73 425.676   9 
  -3   2 -21 1663.62 301.090   9 
   3   2  21 1918.63 280.871  18 
   3   2  21 1731.68 298.549  20 
   3  -2  21 1784.26 290.218  10 
   3   2  22 187.042 102.438  20 
  -3   2 -22 286.192 136.578   9 
   3  -2  22 163.506 99.5384  20 
   3   2  22 188.057 86.6078  18 
   3  -2  22 162.961 86.6999  10 
   3  -2  23 1870.00 279.509  20 
   3   2  23 2526.15 290.048  18 
   3   2  23 2200.48 296.312  20 
  -3   2 -23 2037.23 299.902   9 
   3  -2  23 2168.85 285.156  10 
   3  -2  24 232.409 106.155  10 
   3  -2  24 75.2237 67.9505  20 
   3   2  24 160.767 81.9183  20 
   3   2  25 1266.94 181.845  20 
   3   3 -25 421.181 94.7926  19 
  -3  -3  25 315.438 89.2483  10 
  -3  -3  24 268.948 86.0335  10 
   3   3 -24 197.514 62.6251  19 
  -3   3  24 133.985 75.6774  26 
  -3   3  24 200.332 83.7931  20 
  -3  -3  23 1267.52 230.704  10 
   3   3 -23 1272.19 202.189  19 
  -3   3  23 1431.89 232.577  20 
  -3   3  23 1009.66 203.891  26 
  -3   3  22 2765.29 397.757  26 
  -3  -3  22 3449.56 398.107  10 
   3   3 -22 3611.81 367.335  19 
  -3   3  22 3490.14 390.383  20 
   3   3 -21 4321.08 414.992  19 
  -3   3  21 4154.47 452.825  20 
  -3  -3  21 4367.83 461.298  10 
  -3   3  21 3811.99 493.761  26 
  -3   3  20 1432.51 266.921  20 
  -3  -3  20 1505.54 268.187  10 
  -3   3  20 1492.43 305.384  26 
  -3   3  19 474.447 203.699  26 
  -3  -3  19 586.711 169.671  10 
   3   3 -19 578.119 157.862  15 
  -3   3  19 690.210 190.806  20 
  -3   3  18 3617.24 447.369  20 
   3   3 -18 3783.86 394.133  15 
  -3   3  18 3351.94 510.747  26 
  -3  -3  18 4113.52 464.377  10 
  -3   3  17 11850.1 827.290  20 
   3   3 -17 12873.1 782.043  15 
  -3  -3  17 12343.2 833.734  10 
  -3   3  17 12398.8 1018.50  26 
  -3  -3  16 4806.64 427.192  13 
   3   3 -16 5306.26 493.607  15 
   3   3 -16 5114.97 588.694   9 
  -3   3  16 4798.44 524.338  24 
  -3  -3  16 5116.31 511.866  10 
  -3   3  16 4428.97 611.491  26 
  -3   3  16 5246.82 547.900  25 
   3   3 -16 3750.74 455.901  22 
  -3   3  16 5146.48 533.159  20 
   3   3 -15 1331.32 246.318  15 
  -3  -3  15 1555.38 273.980  10 
  -3  -3  15 1274.27 218.281  13 
  -3   3  15 1283.44 248.114  20 
  -3   3  15 1168.86 329.131  26 
  -3   3  15 1125.15 265.918  25 
   3   3 -15 1046.72 242.955  22 
  -3   3  15 1331.62 289.974  24 
   3   3 -15 1285.83 305.486   9 
  -3  -3  14 338.149 102.067  13 
  -3   3  14 409.768 132.720  24 
  -3   3  14 487.258 190.905  26 
  -3   3  14 325.804 139.959  25 
  -3  -3  14 531.943 162.942  10 
  -3   3  14 541.316 174.893  20 
   3   3 -14 270.469 157.678   9 
   3   3 -14 395.760 128.068  15 
  -3   3  13 225.500 105.245  26 
  -3  -3  13 306.249 123.884  10 
  -3   3  13 295.644 141.174  25 
  -3   3  13 298.288 137.055  24 
  -3  -3  13 394.839 113.370  13 
   3   3 -13 463.216 162.283  15 
  -3   3  13 253.225 116.713  20 
   3   3 -13 420.986 173.044   9 
  -3   3  12 1851.03 331.185  24 
  -3   3  12 2706.87 424.510  25 
   3   3 -12 2828.68 408.945   9 
  -3   3  12 2712.08 348.000  20 
  -3  -3  12 3001.41 351.821  10 
  -3  -3  12 2644.34 304.370  13 
   3   3 -12 2958.44 353.738  15 
   3   3 -12 3019.30 379.842  16 
  -3   3  12 2300.78 411.350  26 
  -3  -3  11 2955.80 327.921  13 
   3   3 -11 2902.97 721.735   1 
  -3   3  11 3020.23 429.933  25 
   3   3 -11 2744.41 399.331   9 
   3   3 -11 3032.41 345.330  15 
  -3  -3  11 2723.06 328.636  10 
  -3   3  11 2692.62 338.155  20 
  -3   3  11 2885.62 410.955  24 
   3   3 -11 3373.79 388.875  16 
  -3   3  11 2984.60 439.298  26 
   3   3 -10 13647.9 1517.26   1 
   3   3 -10 13420.6 889.617   9 
  -3   3  10 12193.3 906.918  26 
   3   3 -10 14164.6 768.534  15 
  -3  -3  10 14453.2 749.116  10 
  -3   3  10 12160.1 679.459  14 
   3   3 -10 15639.9 863.026  16 
  -3   3  10 12927.7 747.231  20 
  -3   3  10 15109.9 981.519  25 
   3   3  -9 9535.28 651.308  16 
  -3   3   9 8794.81 565.206  14 
  -3  -3   9 9834.15 577.771  10 
  -3   3   9 8616.49 721.173  24 
   3   3  -9 9758.42 614.051  15 
   3   3  -9 8790.09 688.815   9 
  -3   3   9 8552.93 746.344  26 
  -3   3   9 9322.84 590.325  20 
  -3   3   9 7642.90 545.993  17 
  -3   3   9 9235.42 670.240  21 
   3   3  -9 7961.89 1120.39   1 
  -3   3   9 7464.56 665.689  25 
  -3   3   8 4058.97 471.367  24 
  -3   3   8 4734.46 401.718  14 
   3   3  -8 4676.10 486.684   9 
  -3   3   8 4057.44 367.428  20 
   3   3  -8 4836.18 416.923  15 
   3   3  -8 4406.01 822.131   1 
  -3  -3   8 5027.53 396.484  10 
   3   3  -8 4660.68 450.805  16 
  -3   3   8 4375.89 482.569  25 
  -3   3   8 3864.14 414.349  21 
  -3   3   8 4479.97 408.185  17 
  -3   3   8 4726.59 534.194  26 
  -3   3   7 3092.20 420.473  21 
   3   3  -7 3435.77 390.093  24 
  -3   3   7 4260.25 485.834  26 
   3   3  -7 4181.91 422.298  21 
  -3   3   7 3724.38 448.821  25 
   3   3  -7 4485.13 429.343  16 
   3   3  -7 4044.15 372.419  15 
  -3   3   7 3906.68 367.778  17 
  -3   3   7 4336.44 367.407  20 
   3   3  -7 4072.17 417.286  25 
  -3  -3   7 4255.47 349.464  10 
  -3   3   7 4487.24 396.694  14 
  -3   3   7 4281.70 479.127  24 
   3   3  -6 14473.4 820.318  21 
  -3   3   6 14372.8 871.235  21 
  -3   3   6 14292.8 901.160  25 
   3   3  -6 16394.7 854.581  25 
  -3  -3   6 13681.1 658.514  10 
  -3   3   6 16354.3 790.626  14 
  -3   3   6 14324.6 911.441  26 
  -3   3   6 14309.9 921.114  24 
   3   3  -6 13633.4 714.063  15 
   3   3  -6 16052.6 848.633  24 
  -3   3   6 14649.6 767.858  17 
  -3   3   6 12034.8 742.396  16 
   3   3  -6 17201.6 851.292  16 
   3   3  -5 4973.96 386.736  15 
  -3   3   5 4266.81 382.570  14 
   3   3  -5 3891.28 388.284  16 
  -3   3   5 4455.00 638.581   5 
  -3   3   5 4777.86 493.305  25 
  -3   3   5 4793.54 406.923  17 
   3   3  -5 4846.66 450.455  21 
   3  -3  -5 4767.98 462.345   1 
  -3   3   5 3626.99 386.407  16 
  -3   3   5 4740.23 497.098  26 
   3   3  -5 4868.89 731.739   1 
  -3   3   5 5481.28 516.015  21 
   3   3  -5 5023.52 457.975  24 
   3   3  -5 4242.43 427.391  25 
  -3   3   5 5307.87 516.749  24 
   3   3  -4 14409.5 1252.39   1 
   3   3  -4 16654.5 888.581  21 
  -3   3   4 16187.0 780.828  14 
   3   3  -4 13623.7 804.552  24 
  -3   3   4 14198.2 1246.54   5 
   3  -3  -4 14649.5 911.885   1 
   3   3  -4 15949.1 844.596  25 
  -3   3   4 14711.0 882.031  26 
  -3   3   4 14231.3 881.936  24 
   3   3  -4 16020.4 802.752  16 
  -3   3   4 13169.9 775.176  16 
   3   3  -4 13997.5 686.900  15 
  -3   3   4 13026.1 834.964  25 
  -3   3   3 4606.77 473.721  25 
  -3   3   3 5348.29 814.849   5 
   3   3  -3 4676.91 432.402  25 
  -3   3   3 5389.46 427.504  14 
  -3   3   3 4890.44 481.555  26 
   3  -3  -3 5127.12 537.018   1 
   3   3  -3 4634.12 651.830   1 
   3   3  -3 5101.52 486.918  21 
  -3   3   3 4679.23 486.725  24 
   3   3  -3 4647.56 409.352  16 
   3   3  -3 4936.88 444.378  24 
  -3   3   3 3713.76 396.579  16 
   3   3  -3 4511.34 362.561  15 
   3   3  -2 12135.3 665.100  16 
  -3   3   2 9414.19 702.879  24 
   3  -3  -2 11256.2 852.770   1 
   3   3  -2 11096.6 687.320  24 
  -3   3   2 11527.4 741.905  26 
  -3   3   2 11195.8 626.139   6 
   3   3  -2 11478.8 585.164  15 
   3   3  -2 10385.3 1521.45   5 
  -3   3   2 11129.9 748.829  25 
  -3   3   2 11396.9 645.589  14 
   3   3  -2 11200.5 715.712  21 
   3   3  -2 10954.9 978.905   1 
  -3   3   2 11053.7 715.892  16 
   3   3  -2 10423.1 666.946  25 
   3   3  -1 4504.81 416.902  25 
  -3   3   1 4120.09 376.782  17 
  -3   3   1 4328.18 439.918  26 
  -3   3   1 3859.17 361.293   6 
  -3   3   1 4167.93 429.993  25 
   3   3  -1 4077.92 395.272  24 
   3   3  -1 4655.43 999.866   5 
  -3   3   1 4666.59 441.962  16 
   3   3  -1 3845.66 362.630  16 
  -3   3   1 4510.90 390.704  14 
   3  -3  -1 4238.70 549.307   1 
  -3   3   1 4257.58 436.430  24 
   3   3  -1 3988.80 422.669  21 
   3   3  -1 3741.04 543.844   1 
   3   3   0 1409.54 236.375  25 
   3   3   0 1068.55 507.076   5 
   3   3   0 1488.16 257.398  21 
  -3   3   0 1568.00 255.584  25 
  -3   3   0 1462.49 246.961  16 
   3   3   0 1693.75 328.137   1 
  -3   3   0 1849.36 252.945   6 
   3   3   0 604.743 118.407   4 
  -3   3   0 1437.41 221.951  14 
   3  -3   0 1507.38 327.475   1 
  -3   3   0 1564.47 233.779  17 
  -3   3   0 1803.22 283.606  26 
   3   3   0 1387.58 237.451  24 
  -3   3   0 1726.47 274.456  24 
  -3   3  -1 15765.7 865.680  25 
  -3   3  -1 15574.0 862.882  16 
   3   3   1 16235.7 876.568  21 
   3  -3   1 15564.2 1151.67   1 
   3   3   1 13809.6 1698.35   5 
  -3   3  -1 15217.0 854.087  24 
   3   3   1 16175.7 850.733  24 
   3   3   1 14671.5 812.138  25 
  -3   3  -1 15545.8 788.454   6 
  -3   3  -1 16941.9 797.735  14 
  -3   3  -1 15659.9 802.244  17 
   3   3   1 15023.4 973.457   1 
  -3   3  -1 16299.8 873.857  26 
   3   3   2 31802.8 2589.21   5 
  -3   3  -2 36608.8 1259.32  14 
  -3   3  -2 36195.0 1378.32  26 
   3   3   2 33569.5 1393.66   1 
  -3   3  -2 31933.3 1332.92  16 
  -3   3  -2 27198.4 1070.82  15 
   3   3   2 38206.7 1447.25  21 
  -3   3  -2 33926.0 1268.94   6 
   3   3   2 32991.1 1283.81  25 
  -3   3  -2 34311.1 1266.71  17 
   3   3   2 31463.9 1272.48  24 
   3  -3   2 32197.9 1762.26   1 
  -3   3  -3 38596.9 1496.10  16 
  -3   3  -3 41567.8 1326.22  15 
  -3   3  -3 37506.2 1319.81  14 
   3   3   3 44572.6 1582.40  21 
   3   3   3 34827.2 1377.28  24 
  -3   3  -3 39195.8 1386.21   6 
   3  -3   3 39020.0 1999.94   1 
   3   3   3 34059.9 1359.98  25 
  -3   3  -3 35563.5 1368.00   9 
   3   3   3 38148.8 2854.26   5 
  -3   3  -3 38065.9 1371.30  17 
   3   3   4 64362.5 1980.65  24 
  -3   3  -4 60892.1 1913.63   6 
  -3   3  -4 59300.3 1829.02  14 
   3   3   4 68437.9 3867.87   5 
  -3   3  -4 60065.1 2023.24  16 
  -3   3  -4 57591.0 1924.56   9 
   3   3   4 57654.9 1971.43  21 
  -3   3  -4 66313.1 1953.65  17 
   3  -3   4 71158.4 2873.58   1 
   3   3   4 63178.1 1960.83  25 
   3  -3   5 28468.5 1787.78   1 
  -3   3  -5 24758.7 1179.38  16 
  -3   3  -5 27380.5 1158.71   6 
  -3   3  -5 31752.2 1151.38  14 
   3   3   5 26653.0 2406.74   5 
   3   3   5 26452.3 1138.35  25 
  -3   3  -5 27467.8 1156.43  17 
   3   3   5 27573.2 1230.78  21 
   3   3   5 26317.4 1149.77  24 
  -3   3  -5 25016.8 1161.05   9 
   3   3   6 8369.59 1316.61   5 
   3  -3   6 7762.01 945.596   1 
   3   3   6 7344.72 592.688  21 
  -3   3  -6 7113.34 515.846  15 
  -3   3  -6 7526.78 599.705   9 
  -3   3  -6 6935.55 504.464  14 
   3   3   6 6970.32 547.277  24 
  -3   3  -6 7937.69 571.483  17 
   3   3   6 6110.53 513.279  25 
   3  -3   6 7420.61 509.547  10 
  -3   3  -6 7431.35 598.154  16 
   3   3   7 929.418 215.394  21 
  -3   3  -7 847.615 168.178  14 
   3   3   7 602.560 152.385  24 
  -3   3  -7 845.488 187.926  17 
  -3   3  -7 757.219 182.263  16 
   3   3   7 507.589 144.591  25 
  -3   3  -7 672.374 163.556  15 
  -3   3  -7 483.020 151.720   9 
   3  -3   7 734.509 164.420  10 
   3  -3   7 781.780 318.678   1 
   3  -3   8 4615.69 408.527  10 
  -3   3  -8 4181.45 381.533  14 
   3   3   8 4947.36 403.725  18 
  -3   3  -8 4565.95 479.427  16 
  -3   3  -8 4155.77 410.867  15 
  -3   3  -8 4446.63 480.019   9 
   3  -3   8 4042.99 734.740   1 
   3   3   8 4193.20 444.965  21 
   3   3   8 4228.21 421.004  25 
   3   3   8 4705.12 444.337  24 
   3  -3   9 1986.35 511.929   1 
  -3   3  -9 2248.10 351.743   9 
   3   3   9 2080.52 286.798  24 
  -3   3  -9 2071.01 322.106  16 
   3   3   9 2066.40 264.360  18 
   3   3   9 2038.46 284.027  25 
   3   3   9 2127.67 307.946  21 
  -3   3  -9 2054.20 292.534  15 
   3  -3   9 1958.20 270.459  10 
   3  -3  10 8919.57 613.765  10 
   3   3  10 10246.7 697.210  21 
   3  -3  10 5890.52 957.090   1 
  -3   3 -10 8755.68 666.293  16 
  -3   3 -10 8456.46 629.425  15 
   3   3  10 9641.36 596.321  18 
  -3   3 -10 6281.09 623.950   9 
  -3   3 -11 10926.1 756.554  16 
   3   3  11 11351.9 683.307  18 
   3  -3  11 10854.6 701.230  10 
   3   3  11 10969.9 719.948  21 
  -3   3 -11 11003.8 860.174   9 
  -3   3 -11 9714.56 698.839  15 
  -3   3 -12 7563.04 614.926  16 
  -3   3 -12 7667.96 735.603   9 
   3   3  12 5932.53 496.462  20 
  -3   3 -12 6375.95 576.657  15 
   3  -3  12 7140.21 573.591  10 
   3   3  12 7762.23 564.942  18 
   3   3  12 7049.16 593.950  27 
  -3   3 -13 19118.0 1056.85  15 
   3   3  13 21159.5 1104.72  27 
   3   3  13 23932.4 1041.54  18 
  -3   3 -13 20671.0 1034.06  16 
   3  -3  13 21566.8 1062.60  10 
  -3   3 -13 20164.3 1238.95   9 
  -3   3 -14 13515.2 1019.77   9 
   3   3  14 14578.8 887.947  27 
   3   3  14 13151.2 778.425  18 
  -3   3 -14 12894.9 847.553  15 
   3  -3  14 13538.5 842.869  10 
   3   3  14 11682.9 762.998  20 
  -3   3 -15 16549.1 981.874  15 
  -3   3 -15 16873.5 1169.54   9 
   3   3  15 14802.6 886.099  20 
   3   3  15 18883.0 951.458  18 
   3   3  15 16982.2 970.307  27 
   3  -3  15 18024.6 993.561  10 
   3  -3  16 2606.09 373.486  10 
  -3   3 -16 2833.66 462.482   9 
   3   3  16 2787.34 336.130  18 
  -3   3 -16 2851.91 392.764  15 
   3   3  16 2336.57 334.290  20 
  -3   3 -17 4050.74 564.899   9 
   3  -3  17 4649.52 496.432  10 
  -3   3 -17 4553.96 476.185  15 
   3   3  17 4461.67 435.651  18 
   3   3  17 3907.12 447.924  20 
   3  -3  18 1969.31 314.506  10 
   3   3  18 1764.13 264.309  18 
   3   3  18 1719.94 293.208  20 
  -3   3 -18 2227.31 319.822  15 
  -3   3 -18 1903.56 368.434   9 
  -3   3 -19 2013.27 371.647   9 
   3   3  19 1966.90 306.060  20 
  -3   3 -19 2315.43 315.371  15 
   3   3  19 2195.83 289.471  18 
   3  -3  19 2133.38 333.107  10 
  -3   3 -20 1236.44 285.510   9 
   3   3  20 930.229 202.576  20 
  -3   3 -20 1120.15 200.759  15 
   3   3  20 1210.90 203.244  18 
   3  -3  20 1142.55 228.558  10 
  -3   3 -21 310.132 124.547   9 
   3  -3  21 543.203 146.212  10 
   3   3  21 399.199 121.749  20 
   3   3  21 483.064 128.938  18 
   3  -3  22 3329.25 349.027  10 
   3   3  22 2708.90 290.302  20 
  -3   3 -22 3173.49 393.058   9 
   3  -3  23 4969.04 404.202  10 
   3   4 -23 1140.40 154.946  19 
   3   4 -22 253.519 93.7723  19 
  -3  -4  22 205.456 82.7630  10 
  -3  -4  21 693.836 160.731  10 
   3   4 -21 643.530 141.361  19 
  -3   4  21 627.079 156.129  26 
  -3   4  20 3093.95 386.648  26 
   3   4 -20 3374.70 338.009  19 
  -3  -4  20 3283.32 366.063  10 
   3   4 -20 3432.58 326.370  15 
  -3   4  20 2221.86 283.601  20 
  -3  -4  19 158.958 68.4057  10 
   3   4 -19 111.715 85.9752  15 
  -3   4  19 145.216 91.9767  26 
  -3   4  19 109.373 92.8580  20 
   3   4 -19 139.625 79.7143  19 
  -3   4  18 1591.48 319.174  26 
   3   4 -18 1389.87 253.176  22 
  -3  -4  18 1552.44 278.636  10 
   3   4 -18 1205.37 224.008  11 
  -3   4  18 1613.08 253.847  20 
   3   4 -18 1737.56 256.625  19 
   3   4 -18 1757.84 266.324  15 
  -3   4  17 3890.97 414.758  20 
   3   4 -17 3501.63 381.401  19 
  -3   4  17 3159.21 490.539  26 
   3   4 -17 3659.89 442.816  22 
  -3  -4  17 3574.97 420.008  10 
   3   4 -17 3643.15 401.091  15 
  -3   4  16 6470.57 614.132  25 
   3   4 -16 7403.34 574.905  19 
  -3   4  16 6206.98 618.038  24 
  -3   4  16 7590.03 594.405  20 
   3   4 -16 7435.59 649.677  22 
  -3  -4  16 7859.11 630.839  10 
   3   4 -16 8411.79 643.143  15 
  -3  -4  16 7771.24 541.409  13 
  -3   4  16 7319.79 727.373  26 
  -3  -4  15 2312.30 306.835  13 
  -3  -4  15 2347.84 333.246  10 
  -3   4  15 2127.84 392.190  26 
  -3   4  15 2467.20 340.023  20 
   3   4 -15 2663.87 364.093  15 
   3   4 -15 1886.41 336.609  22 
   3   4 -15 2194.23 303.946  19 
  -3   4  15 2338.33 395.572  24 
  -3   4  15 2330.09 375.254  25 
   3   4 -14 848.276 217.830  22 
  -3  -4  14 922.231 203.043  13 
  -3   4  14 938.835 279.544  26 
  -3   4  14 875.441 197.859  20 
  -3   4  14 923.516 258.704  24 
   3   4 -14 1048.24 232.228  15 
  -3  -4  14 1084.22 213.668  10 
  -3   4  14 1099.08 278.272  25 
  -3   4  13 7405.14 578.601  20 
  -3   4  13 6306.73 709.070  26 
   3   4 -13 6598.28 583.421  15 
  -3   4  13 6187.00 676.306  25 
  -3  -4  13 6434.80 533.113  13 
  -3   4  13 6164.77 679.726  24 
  -3  -4  13 7112.66 591.711  10 
   3   4 -12 4497.10 475.916  15 
  -3   4  12 3222.40 384.861  20 
  -3  -4  12 4433.99 434.803  13 
  -3   4  12 3005.32 484.253  24 
  -3   4  12 3406.53 503.450  25 
   3   4 -12 4608.82 549.651  16 
  -3  -4  12 4803.54 470.250  10 
  -3   4  12 3862.73 559.481  26 
  -3   4  11 2036.86 408.408  24 
   3   4 -11 2134.77 327.748  15 
  -3   4  11 1845.86 400.049  26 
  -3   4  11 2162.72 366.288  21 
   3   4 -11 2314.44 373.932  16 
  -3   4  11 2416.43 315.317  20 
  -3  -4  11 2043.79 303.941  10 
  -3   4  11 1957.17 397.216  25 
   3   4 -10 408.813 143.957  15 
  -3   4  10 523.126 216.000  26 
  -3  -4  10 413.688 138.292  10 
  -3   4  10 300.905 139.936  24 
  -3   4  10 441.902 149.890  14 
  -3   4  10 243.958 119.817  21 
   3   4 -10 340.009 115.924  19 
   3   4 -10 515.107 174.048  16 
  -3   4  10 277.897 119.547  25 
  -3   4  10 264.333 109.966  20 
   3   4  -9 5136.40 499.611  15 
  -3   4   9 5043.48 600.850  26 
   3   4  -9 4861.21 407.256  19 
  -3   4   9 5312.94 624.052  24 
  -3   4   9 4504.64 538.610  21 
   3   4  -9 5122.96 540.087  16 
   3   4  -9 4610.34 511.336  21 
  -3   4   9 4717.06 472.545  14 
  -3   4   9 4685.60 586.052  25 
  -3  -4   9 5612.86 477.102  10 
  -3   4   8 2956.93 464.862  25 
   3   4  -8 3008.57 368.565  15 
  -3   4   8 3034.29 467.634  24 
  -3   4   8 2715.86 427.345  21 
   3   4  -8 2766.43 294.190  19 
   3   4  -8 3012.59 405.663  16 
  -3  -4   8 2597.25 315.120  10 
  -3   4   8 3145.25 383.013  14 
   3   4  -8 3056.04 420.683  21 
  -3   4   8 3045.51 448.556  26 
  -3   4   7 1586.24 333.190  24 
   3   4  -7 1088.36 177.296  19 
  -3   4   7 1207.58 293.705  25 
   3   4  -7 1121.55 283.504  24 
  -3   4   7 1505.38 320.448  26 
   3   4  -7 1232.26 266.025  21 
   3   4  -7 1220.12 444.097   1 
   3   4  -7 1131.60 264.255  25 
  -3  -4   7 1366.52 225.959  10 
  -3   4   7 1169.69 235.919  14 
  -3   4   7 1058.99 258.057  21 
  -3   4   7 924.270 187.617  17 
  -3   4   7 1126.73 225.492  16 
   3   4  -7 1658.12 294.543  16 
   3   4  -7 1266.06 229.620  15 
  -3   4   6 4216.19 543.232  25 
   3   4  -6 4832.43 371.504  19 
  -3   4   6 4210.10 524.549  21 
   3   4  -6 4044.81 791.603   1 
  -3   4   6 4657.70 552.207  26 
   3   4  -6 4611.52 523.243  25 
  -3   4   6 5119.53 511.661  16 
   3   4  -6 5521.77 586.610  21 
   3   4  -6 5090.93 548.679  24 
  -3   4   6 4989.15 464.896  17 
  -3   4   6 5193.72 495.045  14 
  -3   4   6 4806.88 585.364  24 
  -3  -4   6 5020.52 419.140  10 
   3   4  -6 4913.89 516.971  16 
   3   4  -6 4559.04 443.819  15 
   3   4  -5 11122.8 848.340  21 
  -3   4   5 10792.0 897.122  24 
   3   4  -5 10683.7 564.938  19 
  -3  -4   5 11838.3 651.804  10 
   3   4  -5 12187.0 731.286  15 
  -3   4   5 10358.7 710.848  17 
  -3   4   5 11941.3 892.948  26 
   3   4  -5 13062.9 875.406  24 
  -3   4   5 9978.23 843.131  21 
  -3   4   5 11113.5 781.276  16 
   3   4  -5 10641.0 1288.82   1 
  -3   4   5 11771.4 912.475  25 
  -3   4   5 14434.8 850.424  14 
   3   4  -5 12077.3 843.466  25 
   3   4  -5 12057.7 805.071  16 
   3   4  -4 1079.93 431.239   1 
   3   4  -4 1486.27 237.951  15 
   3   4  -4 692.938 506.851   5 
  -3   4   4 1192.12 255.878  16 
  -3  -4   4 932.029 181.298  10 
  -3   4   4 1299.26 244.995  14 
   3   4  -4 1233.87 247.708  16 
   3   4  -4 898.930 230.542  25 
   3   4  -4 1054.44 238.912  24 
  -3   4   4 1229.70 267.695  26 
  -3   4   4 834.769 241.324  24 
  -3   4   4 1021.24 266.460  21 
  -3   4   4 1185.04 225.675  17 
  -3   4   4 1033.34 247.335  25 
   3   4  -4 1077.93 259.349  21 
   3   4  -3 1148.03 255.144  25 
  -3   4   3 1024.52 245.244  26 
   3   4  -3 677.474 202.174  21 
   3   4  -3 986.062 596.596   5 
   3   4  -3 1024.99 228.806  16 
  -3   4   3 723.198 215.882  24 
   3   4  -3 727.731 286.608   1 
   3   4  -3 1228.07 262.488  24 
   3   4  -3 836.470 173.854  15 
  -3   4   3 704.536 171.663  17 
  -3   4   3 932.546 218.838  16 
  -3   4   3 968.883 228.906  14 
  -3   4   3 679.293 209.974  25 
  -3   4   3 991.638 228.594  21 
   3   4  -2 4537.44 1210.47   5 
  -3   4   2 4830.10 553.785  25 
  -3   4   2 4524.61 466.973  14 
   3   4  -2 2698.85 559.504   1 
   3   4  -2 5388.73 548.455  24 
  -3   4   2 4045.69 533.147  21 
   3   4  -2 4390.91 532.633  21 
  -3   4   2 4610.32 537.562  24 
  -3   4   2 4243.05 482.818  16 
   3   4  -2 4851.68 413.182  15 
  -3   4   2 4970.16 539.143  26 
  -3   4   2 5173.12 473.307  17 
   3   4  -2 4383.01 458.982  16 
   3   4  -2 4222.79 490.330  25 
   3   4  -1 12409.1 885.956  21 
  -3   4   1 13027.7 801.670  14 
  -3   4   1 10969.5 887.332  21 
  -3   4   1 11544.8 863.322  25 
  -3   4   1 12001.4 885.782  24 
   3   4  -1 8592.17 654.231  16 
  -3   4   1 9591.38 569.374  15 
   3   4  -1 10910.2 644.916  15 
   3   4  -1 11670.4 828.749  24 
  -3   4   1 11671.1 849.784  26 
   3   4  -1 9310.19 1712.93   5 
   3   4  -1 11644.2 821.397  25 
  -3   4   1 10159.3 781.329  16 
  -3   4   1 11893.6 746.364  17 
  -3   4   0 5266.69 501.515  17 
  -3   4   0 4627.77 467.844  14 
   3  -4   0 5057.21 708.292   1 
   3   4   0 4669.19 475.633  22 
   3   4   0 5709.93 569.008  25 
  -3   4   0 4870.43 621.353  21 
  -3   4   0 5560.41 593.315  25 
   3   4   0 5919.57 512.363  16 
   3   4   0 5974.06 607.061  21 
  -3   4   0 5653.61 597.318  24 
   3   4   0 5677.59 441.342  15 
   3   4   0 5007.50 542.192  24 
  -3   4   0 6540.10 621.133  26 
  -3   4   0 5121.81 416.990  15 
   3   4   0 4245.94 1150.83   5 
  -3   4   0 5620.77 572.371  16 
   3   4   1 2482.40 334.706  22 
   3   4   1 3283.63 924.493   5 
  -3   4  -1 3931.35 476.978  25 
   3   4   1 3844.19 463.566  21 
  -3   4  -1 3123.33 430.979  24 
   3   4   1 3577.42 443.095  24 
   3   4   1 3929.73 413.508  16 
   3  -4   1 3308.50 596.157   1 
  -3   4  -1 2658.73 399.150  16 
   3   4   1 3740.92 348.039  15 
  -3   4  -1 3226.99 392.039  17 
  -3   4  -1 2920.76 450.366  21 
  -3   4  -1 3528.11 404.131  14 
   3   4   1 3733.13 446.033  25 
  -3   4  -1 3379.53 340.738  15 
  -3   4  -2 1459.96 260.146  17 
   3   4   2 1362.20 298.255  21 
   3   4   2 1064.29 212.381  22 
  -3   4  -2 1472.39 282.199  25 
   3   4   2 1431.68 213.114  15 
   3  -4   2 1291.91 375.548   1 
   3   4   2 1421.08 281.399  25 
  -3   4  -2 1187.82 212.563  15 
  -3   4  -2 1435.68 280.944  24 
  -3   4  -2 1280.89 240.501  14 
   3   4   2 1316.56 265.935  24 
   3   4   2 832.479 570.164   5 
  -3   4  -2 1284.73 283.103  16 
   3   4   2 964.623 204.441  16 
  -3   4  -2 1261.75 286.318  21 
  -3   4  -3 748.567 203.735  24 
  -3   4  -3 896.051 205.702  17 
  -3   4  -3 1121.08 203.439  15 
   3   4   3 1162.10 565.024   5 
   3   4   3 877.760 235.153  21 
   3   4   3 937.577 219.061  25 
  -3   4  -3 797.836 215.784   9 
  -3   4  -3 903.350 197.388  14 
  -3   4  -3 734.719 195.718  21 
   3   4   3 826.616 222.271  24 
   3  -4   3 692.128 293.296   1 
   3   4   3 740.481 160.620  22 
  -3   4  -3 631.419 178.426  16 
   3   4   3 627.703 147.616  16 
  -3   4  -3 861.427 215.461  25 
  -3   4  -4 14006.0 813.538  15 
   3   4   4 14047.4 1985.47   5 
   3   4   4 17222.5 858.602  22 
  -3   4  -4 15500.8 1065.05  21 
  -3   4  -4 15817.5 949.022  25 
  -3   4  -4 15159.2 960.219   9 
  -3   4  -4 15089.9 945.861  24 
  -3   4  -4 16460.7 1024.80  16 
   3   4   4 11194.4 708.644  11 
  -3   4  -4 15476.3 901.044  14 
   3   4   4 17200.1 1009.36  25 
  -3   4  -4 17665.0 980.069  17 
   3   4   4 17348.1 1067.87  21 
   3  -4   4 16952.8 1506.17   1 
   3   4   4 15297.2 969.669  24 
   3   4   5 1282.45 269.464  25 
  -3   4  -5 1099.01 221.993  14 
   3   4   5 768.322 528.997   5 
   3   4   5 862.370 219.385  24 
  -3   4  -5 1174.76 270.127   9 
   3  -4   5 657.014 276.275   1 
  -3   4  -5 1358.32 266.530  24 
  -3   4  -5 1379.65 292.197  16 
  -3   4  -5 1086.82 272.083  17 
  -3   4  -5 1402.84 305.999  21 
   3   4   5 1131.46 256.412  21 
  -3   4  -5 1288.93 234.610  15 
  -3   4  -5 1257.91 251.669  25 
  -3   4  -6 4925.73 504.946  24 
  -3   4  -6 4978.04 550.749   9 
  -3   4  -6 5299.72 523.457  25 
   3   4   6 5541.83 562.686  25 
   3   4   6 5135.98 565.289  21 
  -3   4  -6 5210.05 566.713  16 
  -3   4  -6 4984.30 592.563  21 
   3  -4   6 5055.42 480.722  10 
   3   4   6 5117.61 1154.27   5 
  -3   4  -6 4954.06 486.810  14 
  -3   4  -6 5094.01 489.781  15 
   3   4   6 4719.78 515.113  24 
  -3   4  -7 3742.28 420.866  15 
  -3   4  -7 3544.66 410.496  25 
  -3   4  -7 3773.15 492.727  16 
  -3   4  -7 3178.38 452.071   9 
   3  -4   7 3780.58 415.497  10 
   3   4   7 2791.78 393.667  24 
  -3   4  -7 3350.56 389.184  14 
   3   4   7 4009.05 465.336  25 
  -3   4  -7 3574.82 417.104  24 
  -3   4  -7 3849.45 518.950  21 
   3   4   7 4000.65 489.255  21 
  -3   4  -8 30839.1 1497.20  16 
   3  -4   8 30283.0 1305.12  10 
  -3   4  -8 28070.8 1537.88  21 
   3   4   8 28728.0 1425.46  21 
  -3   4  -8 30057.2 1337.69  15 
  -3   4  -8 31750.7 1565.27   9 
  -3   4  -8 32671.7 1326.95  14 
   3   4   8 29167.6 1381.61  25 
   3   4   8 31408.9 1438.51  24 
  -3   4  -9 10520.5 868.562  21 
   3   4   9 7378.19 669.486  25 
   3   4   9 11966.7 827.625  24 
  -3   4  -9 10664.7 877.982   9 
   3  -4   9 10291.0 719.988  10 
  -3   4  -9 9513.87 794.355  16 
   3   4   9 8692.36 746.711  21 
  -3   4  -9 10902.6 769.145  15 
   3   4  10 11069.5 825.032  21 
  -3   4 -10 10181.8 873.577  21 
  -3   4 -10 11306.0 837.745  16 
   3  -4  10 10338.4 726.987  10 
   3   4  10 9997.07 742.243  24 
  -3   4 -10 11141.0 921.150   9 
   3   4  10 10456.5 748.571  25 
  -3   4 -11 499.183 150.384  15 
  -3   4 -11 624.063 215.515   9 
   3   4  11 644.357 170.177  21 
   3  -4  11 628.732 179.482  10 
  -3   4 -11 592.172 181.735  16 
   3   4  11 553.872 152.920  24 
   3   4  11 614.252 159.667  25 
  -3   4 -12 2638.54 367.788  15 
  -3   4 -12 2671.96 457.313   9 
  -3   4 -12 2866.10 399.076  16 
   3   4  12 2927.09 382.008  21 
   3  -4  12 2594.43 354.432  10 
   3  -4  13 8426.92 662.553  10 
  -3   4 -13 7592.23 784.973   9 
  -3   4 -13 7735.68 661.401  15 
  -3   4 -13 8708.10 704.851  16 
   3  -4  14 507.753 159.230  10 
  -3   4 -14 528.113 186.559  16 
  -3   4 -14 327.681 140.385  15 
  -3   4 -14 396.196 176.168   9 
  -3   4 -15 891.142 213.261  15 
  -3   4 -15 1051.51 280.324   9 
   3  -4  15 866.612 215.721  10 
   3  -4  16 62.4300 46.8065  10 
  -3   4 -16 101.257 76.1162  15 
  -3   4 -16 197.315 139.524   9 
   3  -4  17 1552.22 269.043  10 
  -3   4 -17 1646.94 341.688   9 
  -3   4 -17 1460.00 250.389  15 
   3  -4  18 495.358 157.793  10 
  -3   4 -18 464.568 138.720  15 
  -3   4 -18 357.236 164.561   9 
   3  -4  19 1243.58 218.621  10 
  -3   4 -19 1320.64 221.096  15 
  -3   4 -19 1015.80 264.398   9 
  -3   4 -20 151.225 58.1136  15 
   3  -4  20 301.008 84.5873  10 
   3  -4  21 693.668 143.015  10 
   3  -4  22 121.058 55.4172  10 
  -3  -5  19 412.686 100.532  10 
   3   5 -19 697.871 121.175  19 
  -3  -5  18 1705.19 228.425  10 
   3   5 -18 1690.33 210.090  19 
   3   5 -18 1236.18 193.480  22 
   3   5 -18 1709.27 237.071  15 
   3   5 -18 1504.78 220.411  11 
   3   5 -17 108.605 61.7003  22 
   3   5 -17 218.136 92.9547  15 
  -3   5  17 293.404 110.785  26 
  -3  -5  17 112.904 37.2799  10 
   3   5 -17 143.439 83.6129  11 
   3   5 -17 203.694 76.4607  19 
   3   5 -16 38.4548 55.9269  15 
  -3   5  16 144.748 74.6371  26 
   3   5 -16 88.7628 48.8879  19 
  -3   5  16 192.686 91.3779  25 
  -3  -5  16 149.422 86.4307  10 
   3   5 -16 250.033 118.007  11 
  -3   5  16 69.6242 27.2297  24 
   3   5 -16 67.5697 68.1582  22 
  -3  -5  15 2276.28 295.375  10 
   3   5 -15 2196.12 340.505  22 
  -3   5  15 2379.54 370.128  26 
   3   5 -15 2518.61 288.078  19 
  -3   5  15 2492.46 352.244  25 
  -3   5  15 2213.09 337.185  24 
   3   5 -15 2334.43 320.223  15 
  -3  -5  15 2251.59 269.437  13 
  -3   5  14 2105.67 359.954  24 
  -3  -5  14 1993.27 283.997  10 
   3   5 -14 2073.90 346.812  22 
  -3  -5  14 2017.33 265.437  13 
   3   5 -14 1787.10 240.839  19 
  -3   5  14 1913.55 351.258  26 
   3   5 -14 1958.83 303.228  15 
  -3   5  14 2031.83 339.419  25 
  -3   5  13 2021.35 364.998  24 
  -3  -5  13 2633.78 325.753  10 
   3   5 -13 2545.73 344.719  15 
   3   5 -13 1983.21 256.248  19 
  -3   5  13 2255.77 381.106  26 
  -3  -5  13 2172.36 293.688  13 
   3   5 -13 2187.87 364.985  22 
  -3   5  13 1786.28 324.119  25 
   3   5 -12 2675.21 412.605  22 
   3   5 -12 3347.87 417.297  15 
  -3  -5  12 3335.81 373.224  10 
  -3  -5  12 2866.35 351.290  13 
  -3   5  12 2778.10 435.159  26 
   3   5 -12 3280.19 339.057  19 
  -3   5  12 3396.45 482.862  25 
  -3   5  12 3013.34 479.230  24 
  -3  -5  11 4877.49 460.602  10 
  -3  -5  11 4698.72 462.318  13 
  -3   5  11 5123.63 604.945  26 
   3   5 -11 4604.10 399.949  19 
   3   5 -11 4139.99 533.034  22 
   3   5 -11 5528.97 584.376  16 
  -3   5  11 5362.46 532.725  21 
  -3   5  11 4892.80 582.784  25 
   3   5 -11 5740.76 551.021  15 
  -3   5  11 3939.49 529.533  24 
   3   5 -10 2516.47 283.594  19 
   3   5 -10 3105.91 442.435  16 
  -3   5  10 2624.86 442.531  24 
  -3   5  10 3127.50 442.758  21 
   3   5 -10 2209.56 372.058  22 
  -3   5  10 2475.91 435.847  26 
  -3   5  10 2469.10 420.287  25 
  -3  -5  10 2881.69 345.661  10 
   3   5 -10 2543.59 364.969  15 
  -3   5   9 535.537 220.693  26 
  -3   5   9 425.556 173.645  25 
   3   5  -9 614.161 200.280  21 
   3   5  -9 521.484 123.182  19 
  -3   5   9 217.295 100.178  21 
   3   5  -9 517.619 191.271  16 
  -3  -5   9 492.443 147.610  10 
   3   5  -9 482.899 177.836  22 
  -3   5   9 374.590 186.790  24 
   3   5  -9 592.650 173.353  15 
  -3   5   8 150.166 132.538  24 
  -3   5   8 16.1837 71.6049  26 
  -3   5   8 181.245 90.8016  14 
  -3   5   8 185.211 93.9473  21 
   3   5  -8 148.284 111.914  21 
   3   5  -8 310.939 138.384  15 
   3   5  -8 316.454 155.075  16 
   3   5  -8 129.592 41.1443  22 
  -3   5   8 324.127 141.591  25 
  -3  -5   8 269.820 105.326  10 
  -3   5   7 292.155 136.369  14 
   3   5  -7 173.778 75.3209  22 
  -3   5   7 69.8753 135.149  24 
   3   5  -7 106.864 95.1524  21 
  -3   5   7 332.219 96.8081  16 
   3   5  -7 125.812 88.7775  16 
  -3  -5   7 117.233 49.8275  10 
  -3   5   7 275.298 165.740  26 
  -3   5   7 212.208 126.667  25 
  -3   5   7 240.436 156.857  21 
   3   5  -7 251.593 106.501  15 
   3   5  -6 1300.58 301.190  24 
   3   5  -6 933.640 281.025  21 
  -3   5   6 712.026 223.419  25 
  -3   5   6 682.554 233.812  21 
   3   5  -6 1146.75 256.968  16 
  -3   5   6 724.017 208.026  14 
   3   5  -6 1060.23 224.217  15 
  -3   5   6 903.610 214.016  16 
   3   5  -6 1063.21 270.903  25 
   3   5  -6 907.305 251.244  22 
  -3   5   6 712.690 259.568  24 
  -3   5   6 811.048 261.814  26 
  -3   5   5 2320.18 349.596  16 
   3   5  -5 1902.71 363.999  22 
   3   5  -5 2306.70 401.434  25 
   3   5  -5 2160.40 315.870  15 
   3   5  -5 2522.93 421.611  24 
  -3   5   5 1668.68 404.681  26 
  -3   5   5 2022.35 399.855  21 
  -3   5   5 2115.37 309.384  17 
  -3   5   5 2115.61 420.094  24 
  -3   5   5 2307.28 427.693  25 
   3   5  -5 2300.88 365.622  16 
   3   5  -5 1799.63 364.923  21 
  -3   5   5 2081.23 344.141  14 
   3   5  -4 2384.17 317.335  15 
  -3   5   4 1570.23 360.124  24 
   3   5  -4 1922.24 344.100  22 
  -3   5   4 1780.00 365.310  21 
  -3   5   4 2225.74 398.696  26 
   3   5  -4 1902.01 343.951  16 
   3   5  -4 2077.68 385.451  21 
  -3   5   4 1848.47 385.861  25 
  -3   5   4 1593.07 301.444  16 
  -3   5   4 1831.70 301.838  17 
  -3   5   4 2124.49 354.051  14 
   3   5  -4 1844.30 361.846  24 
   3   5  -4 2058.47 378.151  25 
   3   5  -3 29366.2 1553.64  24 
  -3   5   3 33426.3 1571.64  16 
  -3   5   3 32073.1 1741.38  21 
  -3   5   3 35104.5 1679.86  26 
  -3   5   3 29326.1 1600.98  25 
  -3   5   3 33759.9 1528.21  14 
   3   5  -3 27015.9 1410.30  22 
   3   5  -3 30879.8 1642.10  21 
  -3   5   3 30357.4 1352.86  17 
   3   5  -3 29910.8 1552.60  25 
   3   5  -3 34179.3 1520.24  16 
   3   5  -3 34151.2 1369.20  15 
  -3   5   3 28334.7 1600.21  24 
  -3   5   2 465.973 161.908  24 
   3   5  -2 731.769 282.472  21 
  -3   5   2 331.112 141.473  21 
  -3   5   2 562.007 175.739  17 
   3   5  -2 527.952 195.016  24 
   3   5  -2 451.942 132.998  15 
  -3   5   2 288.774 136.375  16 
  -3   5   2 520.682 195.673  25 
   3   5  -2 340.476 158.979  25 
   3   5  -2 591.800 175.112  16 
  -3   5   2 451.240 162.909  14 
   3   5  -2 272.936 123.104  22 
   3   5  -1 8825.27 706.558  16 
   3   5  -1 9121.41 794.159  25 
  -3   5   1 7515.45 761.509  24 
  -3   5   1 7533.14 639.048  17 
  -3   5   1 6517.95 626.680  14 
   3   5  -1 5756.32 593.152  22 
  -3   5   1 7531.50 755.559  25 
  -3   5   1 6270.43 745.054  21 
   3   5  -1 7245.88 765.961  21 
   3   5  -1 8969.04 800.291  24 
   3   5  -1 7686.06 580.278  15 
  -3   5   1 8304.71 748.606  16 
  -3   5   0 4371.45 577.941  24 
   3   5   0 4760.87 447.029  15 
   3   5   0 5305.48 639.394  21 
  -3   5   0 4500.92 520.313  14 
   3   5   0 5242.25 594.701  24 
   3   5   0 4591.81 492.382  22 
  -3   5   0 4413.26 410.849  15 
  -3   5   0 4856.47 511.649  17 
  -3   5   0 4012.20 594.201  21 
  -3   5   0 4420.72 547.488  16 
   3   5   0 5828.85 618.940  25 
  -3   5   0 5213.57 618.258  25 
   3   5   0 4496.90 494.410  16 
  -3   5  -1 6944.01 707.982  16 
   3   5   1 7012.14 755.319  21 
  -3   5  -1 7543.66 820.576  21 
   3   5   1 7057.10 627.977  22 
  -3   5  -1 8085.90 763.611  25 
   3   5   1 8867.23 804.699  24 
  -3   5  -1 5787.42 498.367  15 
  -3   5  -1 8371.51 782.146  24 
   3   5   1 9037.10 691.499  16 
  -3   5  -1 7734.63 688.367  14 
   3   5   1 7616.69 723.111  25 
   3   5   2 178.433 118.580  24 
   3   5   2 187.949 123.015  25 
  -3   5  -2 351.143 150.246  24 
   3   5   2 228.589 160.160  21 
  -3   5  -2 397.948 171.211  14 
  -3   5  -2 281.518 166.581  21 
   3   5   2 299.485 110.275  16 
   3   5   2 255.048 116.432  22 
  -3   5  -2 187.012 108.437  25 
   3   5   2 154.211 94.2254  11 
  -3   5  -2 124.720 74.4861  15 
  -3   5  -2 265.148 157.689  16 
   3   5   3 353.539 120.397  11 
   3   5   3 371.751 134.996  22 
  -3   5  -3 377.002 208.916  21 
  -3   5  -3 253.409 112.816  24 
   3   5   3 288.357 168.237  21 
   3   5   3 241.697 106.373  25 
  -3   5  -3 355.366 165.185  25 
  -3   5  -3 488.386 214.381  16 
   3   5   3 298.695 158.140  24 
  -3   5  -3 264.274 107.030  15 
  -3   5  -3 231.957 101.155  14 
   3   5   3 539.346 158.235  16 
  -3   5  -4 689.042 235.743  21 
   3   5   4 1038.38 284.302  21 
  -3   5  -4 841.424 188.665  15 
   3  -5   4 825.576 195.708  10 
   3   5   4 950.976 262.002  24 
  -3   5  -4 727.963 212.512  25 
  -3   5  -4 689.926 220.304  16 
  -3   5  -4 775.774 210.037  14 
   3   5   4 1122.98 272.020  25 
  -3   5  -4 917.220 249.763  24 
  -3   5  -5 975.198 229.649  14 
  -3   5  -5 969.642 251.090  25 
   3   5   5 1034.55 280.001  21 
   3   5   5 1359.79 285.292  25 
  -3   5  -5 1029.58 222.037  15 
  -3   5  -5 1143.68 277.655  24 
  -3   5  -5 1389.20 340.376  21 
   3  -5   5 810.120 203.632  10 
   3   5   5 1125.18 265.862  24 
  -3   5  -5 1351.31 311.770  16 
  -3   5  -6 6186.10 624.418  24 
  -3   5  -6 5363.69 552.759  14 
  -3   5  -6 7298.34 611.293  15 
   3   5   6 5711.75 608.712  24 
   3  -5   6 6504.21 578.558  10 
  -3   5  -6 5468.60 692.489  21 
  -3   5  -6 6442.33 675.373  16 
  -3   5  -6 6455.08 630.126  25 
   3   5   6 6912.38 675.321  25 
   3   5   6 7313.66 736.309  21 
  -3   5  -7 454.501 195.380  21 
   3   5   7 186.427 142.561  24 
  -3   5  -7 200.303 111.968  14 
   3   5   7 270.670 143.644  21 
   3  -5   7 553.750 172.164  10 
   3   5   7 270.568 118.045  25 
  -3   5  -7 316.397 126.126  16 
  -3   5  -7 514.583 170.470  25 
  -3   5  -7 535.891 166.714  24 
  -3   5  -7 342.426 131.160  15 
   3   5   8 1660.36 309.011  24 
   3   5   8 1170.89 248.731  25 
  -3   5  -8 1470.98 279.686  15 
  -3   5  -8 1735.57 297.871  14 
  -3   5  -8 1660.52 366.875  21 
   3  -5   8 1485.98 276.739  10 
   3   5   8 1339.84 301.927  21 
  -3   5  -8 1812.91 363.261  16 
  -3   5  -9 6002.86 665.142  16 
   3   5   9 5728.62 588.095  24 
   3   5   9 7413.39 688.500  21 
  -3   5  -9 6433.27 601.180  15 
   3  -5   9 6259.75 563.636  10 
  -3   5  -9 6544.82 689.203  21 
   3   5   9 7071.51 646.029  25 
   3  -5  10 1909.98 307.718  10 
   3   5  10 1733.66 309.734  24 
   3   5  10 1933.43 340.965  25 
  -3   5 -10 1773.15 347.472  16 
  -3   5 -10 1615.46 328.258  21 
   3   5  10 1541.38 303.842  21 
  -3   5 -10 1794.09 309.888  15 
  -3   5 -11 817.762 207.696  16 
   3   5  11 758.590 202.742  21 
   3   5  11 583.927 179.066  25 
  -3   5 -11 747.146 216.430  15 
   3   5  11 629.034 204.083  24 
   3  -5  11 562.333 170.657  10 
  -3   5 -12 1750.03 301.386  15 
  -3   5 -12 1966.26 326.460  16 
   3  -5  12 1884.44 292.382  10 
   3   5  12 1673.56 279.512  21 
  -3   5 -13 2857.54 379.487  15 
   3  -5  13 2758.04 356.968  10 
  -3   5 -13 2757.84 382.235  16 
  -3   5 -14 2355.78 328.738  16 
   3  -5  14 1968.51 297.406  10 
  -3   5 -14 1973.48 303.065  15 
   3  -5  15 44.6577 53.4713  10 
  -3   5 -15 74.2939 55.6429  15 
  -3   5 -16 873.218 181.923  15 
   3  -5  16 844.840 171.245  10 
  -3   5 -16 792.959 138.750  19 
   3  -5  17 3630.49 353.396  10 
  -3   5 -17 2982.64 332.388  22 
  -3   5 -17 3139.21 267.304  19 
  -3   5 -17 3875.93 369.745  15 
   3  -5  18 614.880 132.433  10 
  -3   5 -18 753.662 145.969  15 
   3  -5  19 3126.03 286.629  10 
   3   6 -15 334.293 102.045  22 
   3   6 -15 273.905 95.4854  11 
  -3   6  14 85.4054 43.1990  25 
   3   6 -14 94.0096 65.4560  22 
  -3   6  14 120.159 58.5146  24 
   3   6 -14 88.6218 71.2548  11 
   3   6 -13 5089.13 428.763  15 
   3   6 -13 4093.85 422.641  22 
  -3   6  13 4046.60 421.865  25 
   3   6 -13 4315.03 438.224  11 
  -3  -6  13 3595.92 303.615  13 
  -3   6  13 3824.57 396.901  24 
   3   6 -12 5480.12 457.573  15 
  -3   6  12 4794.46 483.509  24 
   3   6 -12 4896.71 487.480  11 
   3   6 -12 4488.08 467.503  22 
  -3  -6  12 4306.85 363.463  13 
  -3   6  12 4818.15 477.023  25 
  -3   6  11 1510.72 295.526  24 
  -3   6  11 1337.96 262.380  25 
  -3  -6  11 1158.44 196.028  13 
   3   6 -11 1540.65 248.568  15 
   3   6 -11 1407.03 268.093  11 
   3   6 -11 1539.40 276.335  22 
   3   6 -10 6069.56 505.405  15 
   3   6 -10 4760.65 513.377  22 
  -3  -6  10 4726.11 425.976  13 
  -3   6  10 5238.66 551.849  25 
  -3   6  10 4976.09 537.292  24 
  -3   6  10 4972.17 502.536  21 
   3   6 -10 5299.23 540.385  11 
   3   6  -9 43.8906 66.4736  11 
   3   6  -9 79.1347 51.5430  22 
  -3   6   9 162.169 99.7960  21 
   3   6  -9 170.877 82.1665  15 
  -3   6   9 156.846 106.348  24 
  -3   6   9-22.1851 58.3604  25 
  -3  -6   9 61.3959 55.1692  13 
   3   6  -8 1497.50 290.227  22 
   3   6  -8 1926.04 322.627  21 
  -3   6   8 1714.14 320.494  21 
  -3   6   8 1667.47 335.650  24 
   3   6  -8 1578.23 267.475  15 
  -3   6   8 1590.26 323.568  25 
  -3   6   7 4638.36 554.829  21 
   3   6  -7 4503.27 514.826  22 
  -3   6   7 4646.19 572.640  24 
  -3   6   7 4368.07 548.658  25 
   3   6  -7 4777.36 533.796  21 
   3   6  -7 4450.51 444.823  15 
   3   6  -6 1778.68 277.867  15 
   3   6  -6 1546.46 299.120  16 
  -3   6   6 2048.52 389.732  24 
  -3   6   6 1446.59 314.330  25 
  -3   6   6 1444.76 316.788  21 
   3   6  -6 1492.09 315.804  21 
   3   6  -6 2022.43 349.647  22 
   3   6  -5 13.6380 65.5743  21 
   3   6  -5 202.287 107.055  22 
  -3   6   5 79.2343 49.0891  21 
   3   6  -5 152.565 81.7088  11 
  -3   6   5 80.2513 74.9026  25 
   3   6  -5 178.681 115.857  16 
  -3   6   5 135.917 65.5675  16 
   3   6  -5 57.8327 40.1451  15 
  -3   6   5 47.2785 79.9621  24 
   3   6  -4 2405.46 374.427  11 
   3   6  -4 1866.44 322.408  22 
   3   6  -4 2936.44 451.065  21 
   3   6  -4 3413.26 429.027  16 
  -3   6   4 2550.29 409.531  25 
  -3   6   4 3160.45 472.708  24 
  -3   6   4 3078.62 389.411  16 
  -3   6   4 2355.73 411.326  21 
  -3   6   3 462.949 170.423  25 
   3   6  -3 448.027 147.581  22 
  -3   6   3 357.250 172.483  24 
  -3   6   3 458.170 166.118  16 
  -3   6   3 540.477 210.066  21 
   3   6  -3 596.389 176.406  16 
   3   6  -3 504.310 225.594  24 
   3   6  -3 489.024 194.885  21 
   3   6  -3 441.273 176.908  25 
   3   6  -3 364.514 137.959  11 
  -3   6   2 988.192 266.917  24 
   3   6  -2 843.966 208.544  22 
   3   6  -2 982.160 259.261  21 
   3   6  -2 941.393 210.121  16 
  -3   6   2 909.939 253.018  21 
  -3   6   2 961.959 259.280  25 
  -3   6   2 1128.11 258.712  16 
   3   6  -2 769.744 225.777  11 
   3   6  -2 999.280 254.237  24 
   3   6  -2 955.821 243.636  25 
  -3   6   1 7437.23 723.706  24 
   3   6  -1 8713.01 762.123  25 
  -3   6   1 4354.06 477.563  22 
  -3   6   1 6001.86 609.252  16 
   3   6  -1 8847.50 782.198  24 
  -3   6   1 6977.53 713.466  25 
   3   6  -1 6898.59 599.842  22 
   3   6  -1 8117.22 807.065  21 
   3   6  -1 6588.83 602.490  11 
  -3   6   1 7564.48 765.003  21 
   3   6  -1 9136.53 693.719  16 
   3   6   0 5617.42 531.131  22 
   3  -6   0 5606.78 487.203  10 
   3   6   0 5739.69 534.265  16 
  -3   6   0 5996.96 643.873  25 
   3   6   0 5809.03 647.175  21 
   3   6   0 4666.92 569.115  25 
   3   6   0 4612.00 486.486  11 
  -3   6   0 5660.11 679.244  21 
  -3   6   0 4912.64 557.558  16 
   3   6   0 5841.40 618.852  24 
  -3   6   0 6048.46 650.113  24 
   3   6   1 7010.40 718.768  24 
   3   6   1 8291.19 787.661  21 
   3  -6   1 6481.25 548.005  10 
  -3   6  -1 6496.01 670.197  24 
  -3   6  -1 7382.19 685.801  16 
   3   6   1 6020.32 531.289  11 
  -3   6  -1 5524.89 675.692  21 
   3   6   1 5787.86 515.438  22 
  -3   6  -1 8116.53 744.550  25 
   3   6   1 6595.44 679.443  25 
  -3   6  -2 665.655 211.297  24 
   3   6   2 728.376 204.742  25 
  -3   6  -2 813.551 212.165  16 
   3  -6   2 540.736 151.619  10 
  -3   6  -2 463.041 187.068  21 
   3   6   2 651.321 243.479  21 
  -3   6  -2 511.041 172.909  25 
   3   6   2 683.402 208.422  24 
  -3   6  -2 543.706 140.999  15 
  -3   6  -3 4254.15 574.850  21 
   3   6   3 5604.15 621.411  21 
  -3   6  -3 5685.23 622.835  24 
  -3   6  -3 5775.14 602.024  16 
  -3   6  -3 6383.55 621.281  25 
  -3   6  -3 5567.68 468.987  15 
   3   6   3 5150.23 574.660  24 
   3   6   3 7244.24 676.867  25 
   3  -6   3 5775.38 501.671  10 
  -3   6  -4 819.200 209.305  24 
   3  -6   4 684.705 159.763  10 
   3   6   4 821.948 223.666  25 
   3   6   4 914.000 251.091  21 
  -3   6  -4 947.833 219.687  16 
  -3   6  -4 901.167 265.167  21 
   3   6   4 703.072 235.055  24 
  -3   6  -4 812.776 177.928  15 
  -3   6  -4 700.578 213.175  25 
   3   6   5 1036.96 246.847  25 
   3   6   5 873.465 255.036  24 
  -3   6  -5 793.869 230.300  16 
  -3   6  -5 690.788 159.295  15 
  -3   6  -5 1058.48 292.747  21 
   3   6   5 845.914 233.225  21 
  -3   6  -5 842.803 249.344  24 
   3  -6   5 1002.66 206.499  10 
  -3   6  -5 910.527 229.526  25 
  -3   6  -6 309.683 109.634  15 
  -3   6  -6 157.134 107.788  24 
  -3   6  -6 328.099 149.453  16 
  -3   6  -6 87.4072 39.8780  21 
   3  -6   6 273.287 113.367  10 
  -3   6  -6 113.856 100.536  25 
   3   6   6 100.269 82.2445  21 
   3   6   6 237.852 126.636  24 
   3   6   6 277.288 119.846  25 
   3   6   7 906.656 238.315  24 
  -3   6  -7 1065.18 253.652  16 
   3  -6   7 914.619 188.836  10 
  -3   6  -7 726.605 169.374  15 
   3   6   7 784.780 219.542  25 
  -3   6  -7 827.851 232.233  21 
   3   6   7 853.283 217.600  21 
   3   6   8 245.202 144.291  24 
  -3   6  -8 418.182 122.149  15 
  -3   6  -8 563.138 192.010  16 
   3  -6   8 581.007 143.381  10 
  -3   6  -8 286.708 110.403  21 
   3   6   8 628.571 187.488  21 
   3   6   8 224.796 129.977  25 
   3   6   9 909.649 224.076  24 
   3  -6   9 746.293 161.852  10 
  -3   6  -9 785.883 203.151  21 
   3   6   9 935.501 209.542  21 
   3   6   9 810.072 202.975  25 
  -3   6  -9 697.720 156.889  15 
  -3   6  -9 625.335 191.217  16 
   3   6  10 46.2744 48.8350  24 
   3  -6  10 64.0793 33.4801  10 
  -3   6 -10-3.92024 28.5169  16 
  -3   6 -10 40.5351 66.8598  15 
   3   6  10 88.0614 56.2224  25 
   3   6  10 83.4131 84.8949  21 
   3  -6  11 26.3006 51.4925  10 
  -3   6 -11-43.5214 68.3171  16 
  -3   6 -11 95.6950 60.2976  15 
   3   6  11 73.3817 78.7573  21 
  -3   6 -12 849.656 187.199  16 
   3  -6  12 569.356 126.393  10 
  -3   6 -12 876.239 173.649  15 
  -3   6 -13 130.108 62.1679  15 
  -3   6 -13 75.6780 73.4413  22 
   3  -6  13 112.078 64.7424  10 
  -3   6 -14 72.3089 37.1793  15 
  -3   6 -14 38.7442 49.8386  22 
   3  -6  14 20.7504 29.2663  10 
  -3   7   8 0.67872 38.2165  24 
  -3   7   8 27.3081 39.8123  25 
  -3  -7   7 31.9739 38.1439  13 
   3   7  -7 91.6171 53.8966  22 
   3   7  -7 40.8294 17.7858  11 
  -3   7   7 107.019 66.9352  24 
  -3   7   7 107.228 67.7766  25 
  -3   7   6 1762.32 255.684  21 
  -3  -7   6 1058.11 175.292  13 
   3   7  -6 1205.43 217.327  22 
   3   7  -6 1205.10 218.399  11 
  -3   7   6 1551.89 235.332  25 
  -3   7   6 2043.22 269.735  24 
   3   7  -5 2054.86 278.234  22 
   3   7  -5 2237.72 282.516  11 
  -3  -7   5 1559.03 227.727  13 
  -3   7   5 3596.52 379.913  24 
  -3   7   5 3678.54 387.985  21 
  -3   7   5 2618.82 316.515  25 
   3   7  -5 3328.87 346.814  21 
   3   7  -4 529.644 138.646  22 
  -3   7   4 1061.32 210.872  21 
   3   7  -4 729.767 160.615  11 
   3   7  -4 1003.77 189.721  21 
  -3   7   4 1164.68 209.909  24 
  -3   7   4 1235.65 225.422  25 
   3   7  -3 662.715 154.386  21 
  -3   7   3 373.329 115.959  25 
  -3   7   3 434.564 143.082  21 
  -3   7   3 630.703 164.414  24 
   3   7  -3 319.153 111.513  11 
   3   7  -3 349.866 111.695  22 
  -3   7   2 1505.20 246.198  24 
   3   7  -2 1943.59 284.531  21 
  -3   7   2 1717.05 257.681  25 
  -3   7   2 1605.03 275.202  21 
  -3   7   1 1039.04 173.167  16 
   3   7  -1 1236.96 237.113  21 
  -3   7   1 875.630 201.935  21 
  -3   7   1 777.318 177.769  24 
  -3   7   1 535.445 138.566  25 
  -3   7   0 1689.88 239.647  16 
  -3   7   0 1985.75 311.147  21 
   3   7   0 2167.39 311.043  21 
   3  -7   0 1182.85 161.605  10 
  -3   7   0 2015.30 287.294  24 
  -3   7   0 2011.63 287.497  25 
  -3   7  -1 164.037 85.2401  25 
  -3   7  -1 124.075 79.5169  21 
   3   7   1 164.972 85.3826  21 
  -3   7  -1 57.2482 31.0702  16 
  -3   7  -1 89.3810 55.7156  24 
   3  -7   1 65.1496 44.6432  10 
  -3   7  -2 660.653 155.544  16 
   3   7   2 756.410 175.808  21 
   3  -7   2 598.524 110.813  10 
  -3   7  -2 751.286 181.291  21 
   3   7   3 604.496 161.967  21 
  -3   7  -3 760.800 168.238  16 
   3  -7   3 536.018 103.359  10 
  -3   7  -3 633.655 168.981  21 
  -3   7  -4 631.974 142.553  16 
   3   7   4 462.305 134.217  21 
  -3   7  -4 392.273 131.561  21 
   3   7   5 1335.46 222.408  21 
  -3   7  -5 1153.62 216.678  21 
  -3   7  -5 1454.27 215.851  16 
   3   7   6 1129.86 192.147  21 
  -3   7  -6 1929.68 249.579  16 
  -3   7  -7 459.043 109.736  16 
  -4   0  27 9.12985 26.5558  26 
  -4   0  27-30.3193 25.4602  20 
  -4   0  26 131.305 52.5564   8 
  -4   0  26 132.133 34.6230  20 
  -4   0  26 99.5476 89.8625  26 
  -4   0  25-71.2551 66.3971  26 
  -4   0  25 106.464 61.5116  20 
  -4   0  24 213.683 113.607  20 
  -4   0  24 74.4555 108.687  26 
  -4   0  24 63.0156 54.6634  10 
  -4   0  23-40.4073 71.0209  10 
  -4   0  23 136.327 118.715  20 
  -4   0  23 77.6006 103.377  26 
  -4   0  22 5366.38 718.164  26 
  -4   0  22 5852.16 595.973  20 
  -4   0  22 6393.01 620.565  10 
  -4   0  21 18.3293 77.8917  10 
  -4   0  21-75.6910 64.4282  20 
  -4   0  20 14830.2 971.766  10 
  -4   0  20 13605.0 940.829  20 
  -4   0  19-1.19540 63.0521  20 
  -4   0  19-16.2862 63.5626  10 
  -4   0  18 5828.92 581.330  20 
  -4   0  18 4810.92 470.459  13 
  -4   0  18 6347.71 597.390  10 
  -4   0  17 30.3297 37.3658  20 
  -4   0  17-11.5568 44.2633  13 
  -4   0  17 63.0687 81.6000  10 
  -4   0  16 225.568 94.8377  13 
  -4   0  16-284.041 390.625   3 
  -4   0  16-49.0215 419.807   2 
  -4   0  16 128.905 58.6568  20 
  -4   0  16 132.529 77.5412  10 
   4   0 -15-15.9680 60.9826   1 
  -4   0  15 3.43746 14.2886  13 
  -4   0  15-43.0424 42.9399  20 
  -4   0  15-44.2630 217.926   2 
  -4   0  15 166.705 160.531   3 
  -4   0  15 1.75203 21.1008  10 
  -4   0  14 31520.4 1232.26  18 
  -4   0  14 33142.8 1201.96  13 
  -4   0  14 33719.9 1352.90  20 
  -4   0  14 33928.8 3133.26   3 
   4   0 -14 34362.2 1978.72   1 
  -4   0  14 34376.3 1314.93  10 
  -4   0  14 31816.7 3002.29   2 
   4   0 -13 104.914 130.327   1 
  -4   0  13-1.56242 43.0894  20 
  -4   0  13 24.9557 45.0011  18 
  -4   0  13 1.78072 24.1568  13 
  -4   0  13-42.6462 23.4714  10 
  -4   0  13-50.2575 66.6484   3 
  -4   0  13 49.2269 142.172   2 
  -4   0  12 394.886 344.017   3 
  -4   0  12 464.410 121.439  10 
  -4   0  12 510.008 114.563  13 
  -4   0  12 472.858 121.581  20 
  -4   0  12 451.309 110.606  18 
  -4   0  12 738.396 428.320   2 
   4   0 -12 411.290 176.661   1 
  -4   0  11-3.91217 123.783   2 
   4   0 -11 94.5559 110.295   1 
  -4   0  11 2.35234 15.6468  10 
  -4   0  11 22.1541 40.0173  18 
  -4   0  11 123.823 180.151   3 
  -4   0  10 7445.28 1148.96   2 
  -4   0  10 8422.00 1219.81   3 
   4   0 -10 7197.43 752.061   1 
   4   0  -9-5.44632 87.2713   1 
  -4   0   9-48.9857 76.0763   2 
   4   0  -8 91037.6 2957.57   1 
  -4   0   8 86448.9 3811.48   2 
  -4   0   7 93.9310 154.772   2 
   4   0  -7 47.9091 108.014   1 
  -4   0   7 68.8056 95.4567   3 
   4   0  -6 20860.7 1081.38   1 
  -4   0   6 21912.9 1537.14   3 
   4   0  -6 23131.4 1169.31   1 
  -4   0   6 24606.1 1604.01   2 
  -4   0   5 18.8362 34.7191   1 
  -4   0   5-63.9794 131.404   3 
   4   0  -5-61.9899 76.5096   1 
  -4   0   5 8.70271 33.8700   2 
   4   0  -4 27300.1 1165.26   5 
   4   0  -4 29808.9 1254.98   1 
  -4   0   4 28719.1 1578.53   2 
  -4   0   4 26041.7 1541.74   3 
  -4   0   4 27141.4 1285.07   1 
  -4   0   3-8.93496 97.8588   2 
   4   0  -3 43.9029 30.4597   1 
  -4   0   3 34.8955 85.0629   3 
   4   0  -3 70.1462 72.2250   5 
  -4   0   3 112.490 80.0533   1 
  -4   0   2 5016.85 529.732   2 
   4   0  -2 5080.89 455.354   1 
  -4   0   2 5460.82 496.604   1 
  -4   0   2 4887.96 530.014   3 
   4   0  -2 5699.41 483.995   5 
   4   0  -1-23.1739 26.7226   5 
   4   0  -1 53.9225 30.9343   2 
  -4   0   1-5.53607 96.5847   5 
  -4   0   1 11.1544 41.6715   1 
   4   0  -1-50.3253 51.1380   3 
   4   0  -1 35.8532 51.8440   1 
  -4   0   0 30626.2 1229.61   1 
   4   0   0 28685.0 1073.10   3 
   4   0   0 28990.6 1166.97   1 
  -4   0   0 30932.4 1481.52   5 
   4   0   0 28495.8 1172.44   4 
  -4   0  -1 56.5402 91.9185   5 
  -4   0  -1 12.3615 13.8333   1 
   4   0   1 7.26771 43.9304   4 
   4   0   1 43.4550 38.7238   1 
  -4   0  -2 6900.14 743.553   5 
  -4   0  -2 6300.61 521.166   1 
   4   0   2 6262.77 496.634   1 
   4   0   2 6583.04 548.798   4 
  -4   0  -3 29.6223 34.9907   1 
  -4   0  -3 54.1527 77.2732   5 
   4   0   3-21.3483 42.8960   1 
  -4   0  -3-38.7382 76.4491   4 
   4   0   3 13.5055 37.1955   4 
   4   0   4 13765.3 887.225   4 
  -4   0  -4 14687.8 867.873   1 
  -4   0  -4 14486.1 944.834   4 
   4   0   4 13843.5 802.270   1 
  -4   0  -5 30.2422 43.9079   1 
   4   0   5 68.0717 77.8924   1 
   4   0   5-101.888 94.2714   4 
   4   0   6 103.947 43.0600   1 
   4   0   6 177.815 123.456   4 
  -4   0  -6 100.427 86.1213   1 
   4   0   7-15.5614 52.4648   1 
   4   0   7 10.7150 24.1827   4 
   4   0   8 13815.5 910.250   1 
   4   0   8 13860.8 1099.35   4 
   4   0   9 28.6757 54.1335   1 
   4   0  10 15936.6 785.471  18 
   4   0  10 17045.8 855.470  27 
   4   0  10 16131.6 1063.71   1 
   4   0  10 15591.1 727.312  12 
   4   0  11 40.1541 53.5466  12 
   4   0  11-1.06025 34.9296  10 
   4   0  11-28.1690 84.9885   1 
   4   0  11-29.1777 58.2946  18 
   4   0  11 12.3592 34.1200  23 
   4   0  11 16.7515 23.9034  27 
   4   0  12 54185.4 1678.64  23 
   4   0  12 50655.3 1577.86  10 
   4   0  12 54661.8 1764.01  18 
   4   0  12 53241.0 3229.08   2 
   4   0  12 55958.0 1874.00  27 
   4   0  12 49732.9 3136.54   3 
   4   0  12 52233.7 1671.65  12 
   4   0  13 2.16149 45.6033  23 
   4   0  13 39.2933 31.2518  10 
   4   0  13-30.4131 67.1553  18 
   4   0  13 20.7979 48.9006  12 
   4   0  13 12.0292 37.2243  27 
   4   0  13-45.2821 122.311   2 
   4   0  14 21836.2 1005.64  23 
   4   0  14 23384.0 1085.90  18 
   4   0  14 20981.9 1000.89  12 
   4   0  14 16032.6 1943.65   3 
   4   0  14 21347.4 960.905  10 
   4   0  14 17617.8 2025.66   2 
   4   0  14 24053.7 1200.57  27 
   4   0  15-7.35734 45.5608  23 
   4   0  15 50.0146 73.7930  12 
   4   0  15-31.5193 49.3412  18 
   4   0  15-94.4749 70.3692  27 
   4   0  15 47.3067 60.9118  10 
   4   0  16 2259.85 308.968  10 
   4   0  16 2304.91 327.991  18 
   4   0  16 2025.36 293.700  23 
   4   0  16 2036.19 313.358  12 
   4   0  16 2240.78 364.512  27 
   4   0  17 6.48035 37.5686  27 
   4   0  17-70.8246 83.1694  10 
   4   0  17 44.7125 63.7194  12 
   4   0  17-45.4237 73.5735  18 
   4   0  18 4061.40 518.717  27 
   4   0  18 3810.59 413.134  10 
   4   0  18 4198.84 460.225  12 
   4   0  18 4168.96 463.571  18 
   4   0  19-68.4509 64.1682  18 
   4   0  19-27.1786 67.1017  10 
   4   0  20 10156.9 710.129  10 
  -4   0 -20 11440.7 848.610   9 
   4   0  20 10049.3 740.296  18 
  -4   0 -21 6.79494 25.0858   9 
   4   0  21 5.54095 58.6419  10 
   4   0  21 40.8904 34.9054  18 
   4   0  22 216.609 101.504  10 
   4   0  22 222.129 98.2861  18 
   4   0  23 38.3594 53.6759  20 
   4   0  23-4.46779 46.7493  10 
   4   0  23-44.5759 44.0445  18 
   4   0  24 362.012 134.947  20 
   4   0  25-20.0888 18.2431  20 
   4   0  26 202.595 73.8414  20 
  -4   1  27 233.357 77.0870  20 
  -4  -1  27 166.261 66.8094   8 
  -4  -1  27 30.4351 44.9560  26 
  -4   1  26 170.835 102.544  26 
  -4   1  26 204.919 88.6097  20 
  -4  -1  26 70.6479 23.7272  10 
  -4  -1  26 96.0656 52.4360  20 
  -4  -1  26 15.8706 29.8329  26 
  -4  -1  25 107.811 79.3294  10 
  -4   1  25 137.644 75.8437   8 
  -4   1  25 67.2911 73.3065  20 
  -4  -1  25 114.231 96.0893  26 
  -4  -1  25 73.5783 24.5259  20 
  -4   1  25 145.334 86.5797  26 
  -4  -1  24 1157.82 244.766  10 
   4   1 -24 819.822 150.135  19 
  -4   1  24 931.053 181.587   8 
  -4   1  24 1035.51 231.762  20 
  -4  -1  24 781.506 174.604  20 
  -4   1  24 749.779 223.305  26 
  -4   1  23 48.7085 29.6105   8 
  -4  -1  23 58.9170 76.8188  10 
  -4   1  23-51.2801 73.4711  20 
  -4  -1  23-6.80476 38.7775  20 
   4   1 -23 20.2148 31.9753  19 
  -4   1  23 103.462 100.625  26 
  -4   1  22 101.545 61.6212  26 
  -4  -1  22 165.330 130.161  10 
  -4  -1  22 136.121 97.7796  20 
   4   1 -22 209.966 90.4998  19 
  -4   1  22 277.599 137.487  20 
  -4  -1  21 721.671 217.888  10 
  -4   1  21 789.974 254.186  26 
  -4   1  21 796.895 219.489  20 
  -4  -1  21 801.844 212.723  20 
  -4   1  20 8109.14 752.112  10 
  -4  -1  20 10582.4 806.070  10 
  -4   1  20 9075.91 763.978  20 
  -4  -1  20 9327.74 750.300  20 
  -4   1  20 9373.06 917.516  26 
  -4   1  19 3079.14 432.521  10 
  -4  -1  19 3115.19 423.061  20 
  -4   1  19 3249.50 531.578  26 
  -4  -1  19 3492.34 452.144  10 
  -4   1  19 3388.77 464.845  20 
  -4   1  18 10787.4 829.207  10 
  -4  -1  18 10830.4 788.106  20 
  -4   1  18 11128.0 823.426  20 
  -4  -1  18 11873.4 826.026  10 
  -4   1  18 10393.0 965.391  26 
  -4   1  18 11792.4 771.875  17 
  -4  -1  17 1712.47 239.716  13 
  -4   1  17 1153.42 269.525  10 
  -4   1  17 1955.58 323.592  20 
  -4   1  17 1315.92 336.111  26 
  -4  -1  17 1353.32 263.046  20 
  -4  -1  17 1464.37 268.926  10 
  -4  -1  16 1899.49 298.549  20 
   4   1 -16 2244.10 584.212   1 
  -4   1  16 1763.41 313.739  20 
  -4  -1  16 2337.53 320.104  10 
  -4   1  16 1988.13 338.108  10 
  -4  -1  16 2223.02 277.737  13 
  -4   1  16 1960.46 412.882  26 
  -4   1  15 1909.70 933.330   2 
  -4  -1  15 2399.56 274.761  13 
  -4   1  15 2847.36 1141.73   3 
  -4   1  15 1994.90 359.233  25 
  -4   1  15 2152.13 322.309  10 
   4   1 -15 1893.19 524.049   1 
  -4  -1  15 2287.39 319.941  20 
  -4   1  15 1777.34 332.678  24 
  -4   1  15 2128.20 299.911  18 
  -4   1  15 1806.99 283.634  13 
  -4  -1  15 2093.28 795.730   3 
  -4  -1  15 2850.89 344.638  10 
  -4   1  15 2284.99 335.264  20 
  -4  -1  15 1983.99 792.590   2 
  -4  -1  14 392.438 118.842  10 
  -4   1  14 328.498 122.549  10 
  -4  -1  14 506.837 116.229  13 
  -4   1  14 273.722 106.472  13 
  -4   1  14 343.501 121.758  20 
  -4  -1  14 79.3117 206.049   2 
  -4  -1  14 428.065 140.813  20 
  -4   1  14 275.475 113.067  18 
   4   1 -14 383.330 254.190   1 
  -4   1  14 72.1552 138.261   3 
  -4   1  14 91.2310 287.075   2 
  -4  -1  14 337.901 374.916   3 
  -4   1  14 233.409 110.281  25 
  -4   1  14 186.501 97.7432  24 
  -4  -1  13 2952.18 328.512  10 
  -4   1  13 2512.60 878.705   2 
  -4   1  13 3002.62 351.367  10 
  -4   1  13 2498.29 307.648  13 
  -4   1  13 2291.74 874.075   3 
  -4   1  13 2859.03 387.901  24 
  -4   1  13 2867.20 350.409  20 
  -4   1  13 3241.09 327.459  18 
  -4  -1  13 3140.18 292.317  13 
   4   1 -13 2775.30 594.946   1 
  -4  -1  13 2884.80 311.225  20 
  -4   1  13 3066.24 402.086  25 
  -4   1  12 8056.13 1502.78   2 
  -4   1  12 8943.85 574.984  13 
  -4   1  12 9562.98 1652.12   3 
  -4  -1  12 9090.17 572.480  20 
   4   1 -12 9620.14 1091.34   1 
  -4   1  12 12372.1 629.840  18 
  -4  -1  12 9873.49 588.635  10 
  -4   1  12 9417.20 629.619  20 
  -4   1  12 10810.3 727.187  24 
  -4   1  12 9119.23 693.672  25 
  -4   1  12 10922.2 659.551  10 
  -4  -1  12 10941.3 571.225  13 
   4  -1 -12 11612.7 881.390   1 
  -4   1  11 17597.1 2066.49   2 
  -4  -1  11 17218.5 742.812  13 
  -4   1  11 15497.2 778.030  13 
  -4   1  11 18935.8 874.492  20 
  -4   1  11 20656.9 803.333  18 
  -4   1  11 19930.6 2196.95   3 
   4   1 -11 19928.5 1480.66   1 
  -4  -1  11 18758.0 802.997  10 
  -4   1  11 17099.2 840.003  10 
   4  -1 -11 17971.8 1105.04   1 
  -4   1  10 74112.6 2147.29  20 
   4  -1 -10 84679.6 2665.24   1 
   4   1 -10 89182.6 3325.78   1 
  -4   1  10 84551.4 4479.04   2 
  -4   1  10 80354.2 4398.95   3 
  -4   1   9 17614.5 1863.40   3 
   4  -1  -9 13872.3 899.395   1 
  -4   1   9 15287.8 1734.63   2 
   4   1  -9 13936.0 1161.86   1 
  -4   1   8 8354.28 1196.28   3 
   4   1  -8 7212.38 789.900   1 
   4  -1  -8 8410.54 673.868   1 
  -4   1   8 7695.68 1132.14   2 
   4  -1  -7 8194.55 645.770   1 
   4   1  -7 9067.89 821.686   1 
  -4   1   7 8645.83 1179.53   3 
  -4   1   7 9879.30 1208.84   2 
  -4   1   7 8177.82 692.574   1 
  -4   1   6 7916.65 670.151   1 
   4   1  -6 8104.89 743.374   1 
   4  -1  -6 7741.62 611.342   1 
  -4   1   6 6604.24 1017.66   3 
  -4   1   6 7700.23 1071.71   2 
  -4   1   5 18430.9 1028.24   1 
   4  -1  -5 17971.6 945.304   1 
  -4   1   5 17589.1 1575.24   2 
  -4   1   5 16731.0 1548.64   3 
   4   1  -5 16289.3 1049.14   1 
  -4   1   4 8405.89 1035.75   2 
   4   1  -4 7717.98 674.141   1 
   4  -1  -4 7972.82 959.269   3 
   4  -1  -4 7974.89 612.375   1 
  -4   1   4 8342.78 664.578   1 
  -4   1   4 7901.66 994.972   3 
   4  -1  -4 8305.05 986.915   2 
   4  -1  -3 3954.46 662.120   2 
   4   1  -3 4185.82 462.979   1 
  -4   1   3 4846.12 496.126   1 
   4  -1  -3 4126.51 427.629   1 
   4   1  -3 4679.69 462.972   1 
   4  -1  -3 3880.33 653.119   3 
   4  -1  -2 6849.64 830.203   2 
  -4   1   2 7887.93 625.672   1 
   4  -1  -2 6832.00 519.347   4 
   4   1  -2 8225.64 587.948   1 
   4   1  -2 6409.36 769.938   5 
   4   1  -2 6939.93 582.238   1 
   4  -1  -2 6849.78 838.321   3 
   4  -1  -2 7081.04 566.134   1 
   4   1  -1 14501.2 830.276   1 
   4  -1  -1 12957.1 1162.92   2 
   4  -1  -1 14813.3 802.825   4 
  -4  -1   1 13345.9 831.262   1 
   4  -1  -1 15155.1 850.238   1 
  -4   1   1 16020.7 934.095   1 
   4   1  -1 12610.4 1079.79   5 
   4  -1  -1 12985.8 1163.18   3 
   4   1   0 21176.0 1418.29   5 
  -4  -1   0 18674.8 960.858   1 
   4   1   0 18572.2 922.310   1 
  -4   1   0 20977.6 1111.82   1 
   4  -1   0 22030.0 1018.39   4 
   4  -1   0 20328.9 1024.40   1 
   4   1   1 56285.5 2479.14   5 
  -4  -1  -1 51910.9 1716.44   1 
   4  -1   1 50827.2 1826.50   1 
   4   1   1 53061.9 1741.01   4 
   4   1   1 53406.3 1692.24   1 
  -4   1  -1 53578.0 1971.49   1 
   4  -1   1 52629.0 1817.20   4 
   4  -1   2 156789. 4170.76   4 
  -4   1  -2 156728. 4222.32   4 
   4  -1   2 175325. 4296.76   1 
   4   1   2 170221. 3917.45   1 
  -4  -1  -2 161854. 3937.08   1 
   4   1   2 176564. 5182.08   5 
   4   1   2 164795. 4054.23   4 
  -4  -1  -3 18737.3 869.406   1 
   4  -1   3 18494.4 1062.59   1 
   4   1   3 18649.5 965.945   4 
   4   1   3 20091.5 872.665   1 
   4  -1   3 19142.4 1082.63   4 
   4   1   4 27314.9 1245.42   4 
   4  -1   4 27328.2 1354.73   1 
   4  -1   4 26181.2 1374.06   4 
  -4  -1  -4 25964.2 1051.03   1 
   4   1   4 27690.4 1031.94   1 
  -4  -1  -5 36252.8 1601.30   4 
   4  -1   5 38597.1 1779.98   4 
   4   1   5 37691.1 1564.37   4 
  -4  -1  -5 34746.7 1267.29   1 
   4  -1   5 36238.9 1655.69   1 
   4   1   5 36023.7 1565.26   3 
   4   1   5 38401.4 1262.20   1 
   4   1   5 36104.7 1562.45   2 
  -4  -1  -6 79578.8 2217.04   1 
   4  -1   6 84214.7 2802.31   1 
   4   1   6 76196.2 2774.36   2 
   4   1   6 81617.3 2843.78   3 
   4  -1   6 84488.2 2956.01   4 
   4  -1   7 9403.33 835.149   1 
   4  -1   7 10447.5 943.046   4 
  -4  -1  -7 8962.99 565.397   1 
   4   1   7 9557.42 822.277   4 
   4   1   7 7706.81 836.773   2 
   4   1   7 8826.66 892.546   3 
   4   1   7 9155.30 537.327   1 
   4  -1   8 10949.4 961.473   1 
   4   1   8 12099.0 972.964   4 
   4   1   8 10145.0 1063.96   2 
   4   1   8 10907.4 1105.80   3 
   4   1   8 14529.9 685.439   1 
   4   1   9 5889.99 844.558   3 
   4  -1   9 7434.42 480.447  23 
   4   1   9 6718.70 427.468  12 
   4   1   9 5856.96 428.117   1 
   4  -1   9 6569.70 501.268  27 
   4   1   9 7509.06 518.327  18 
   4  -1   9 7120.11 769.333   1 
   4   1   9 5993.00 858.425   2 
   4  -1   9 6908.67 433.248  12 
   4   1   9 7338.07 518.678  27 
   4   1  10 6455.73 442.753  12 
   4  -1  10 7422.83 506.105  23 
   4   1  10 7756.24 559.234  27 
   4  -1  10 7082.39 470.157  12 
   4   1  10 5873.75 879.856   2 
   4   1  10 6273.07 921.712   3 
   4   1  10 6986.71 530.227  18 
   4  -1  10 6989.75 477.357  18 
   4  -1  10 7005.90 450.315  10 
   4  -1  10 6877.15 790.715   1 
   4  -1  10 6671.32 524.470  27 
   4  -1  11 5082.86 714.493   1 
   4   1  11 3763.82 768.870   2 
   4  -1  11 4040.06 443.696  27 
   4  -1  11 4935.81 420.355  23 
   4  -1  11 4746.07 376.378  10 
   4   1  11 4381.30 347.740  23 
   4  -1  11 4734.21 398.383  18 
   4   1  11 5015.52 406.115  12 
   4   1  11 4030.74 410.752  18 
   4   1  11 5187.01 464.720  27 
   4   1  11 3899.91 785.232   3 
   4  -1  11 4713.64 395.750  12 
   4   1  12 1085.58 185.123  10 
   4  -1  12 1281.56 272.252  27 
   4  -1  12 1476.84 225.894  18 
   4   1  12 1552.64 252.749  27 
   4   1  12 1516.14 202.531  23 
   4  -1  12 1377.13 232.805  23 
   4  -1  12 1534.69 386.639   1 
   4  -1  12 1310.56 211.926  12 
   4   1  12 1896.75 277.671  18 
   4   1  12 1406.28 512.352   3 
   4   1  12 1423.33 492.611   2 
   4   1  12 1443.27 227.993  12 
   4  -1  12 1456.96 210.520  10 
   4  -1  13 2485.85 307.877  18 
   4   1  13 2222.21 275.141  23 
   4   1  13 2748.05 356.584  18 
   4   1  13 2640.03 317.937  12 
   4   1  13 2838.94 365.140  27 
   4  -1  13 2734.21 573.873   1 
   4  -1  13 2143.11 356.153  27 
   4  -1  13 2716.84 317.231  12 
   4   1  13 2040.33 277.040  10 
   4  -1  13 2642.72 303.005  10 
   4  -1  13 2729.15 330.644  23 
   4   1  14 1345.00 236.248  12 
   4   1  14 1761.14 301.730  27 
   4  -1  14 1144.21 264.877  27 
   4  -1  14 1119.22 351.946   1 
   4  -1  14 1481.47 242.918  18 
   4   1  14 1035.35 193.631  10 
   4  -1  14 1335.54 213.849  12 
   4   1  14 1199.70 234.649  18 
   4  -1  14 1470.68 250.365  23 
   4  -1  14 1361.22 225.684  10 
   4   1  15 625.741 191.061  27 
   4  -1  15 409.578 141.976  23 
   4  -1  15 362.959 121.611  10 
   4  -1  15 529.862 164.251  12 
   4   1  15 316.381 100.697  10 
   4   1  15 598.004 155.258  12 
   4   1  15 512.293 147.785  18 
   4  -1  15 498.457 138.632  18 
   4   1  16 15156.1 854.398  10 
  -4   1 -16 15494.0 832.399  15 
   4  -1  16 17660.8 933.301  10 
   4   1  16 18229.4 1075.77  27 
   4   1  16 17788.4 957.754  12 
   4  -1  16 15524.1 915.547  12 
   4   1  16 17511.3 989.850  18 
   4  -1  16 18201.1 951.921  18 
   4  -1  17 975.231 214.035  18 
   4  -1  17 950.589 219.812  12 
   4   1  17 842.219 207.185  18 
   4   1  17 918.942 233.823  27 
   4   1  17 779.426 183.131  10 
   4  -1  17 726.617 178.179  10 
  -4   1 -17 963.126 247.201   9 
   4  -1  18 951.993 212.686  18 
   4   1  18 743.378 176.122  10 
  -4   1 -18 924.628 239.409   9 
   4  -1  18 728.141 210.619  12 
   4   1  18 769.563 210.510  18 
   4  -1  18 953.919 203.159  10 
   4   1  18 928.253 253.668  27 
   4   1  19 5837.82 614.905  27 
  -4   1 -19 7030.14 688.946   9 
   4   1  19 6058.92 577.353  18 
   4  -1  19 6123.55 557.902  10 
   4  -1  19 6462.66 557.085  18 
   4   1  19 5267.44 497.251  10 
   4   1  20 5939.96 553.983  18 
   4  -1  20 6097.90 540.571  18 
   4   1  20 5105.94 470.981  10 
  -4   1 -20 6441.35 650.720   9 
   4  -1  20 5964.03 536.336  10 
   4  -1  21 13698.9 826.936  18 
  -4   1 -21 14087.0 955.517   9 
   4   1  21 14064.0 852.459  18 
   4  -1  21 14079.7 837.558  10 
   4   1  22 1532.25 254.323  18 
   4   1  22 1440.54 266.405  20 
   4  -1  22 1314.22 238.502  10 
  -4   1 -22 1447.88 285.195   9 
   4  -1  22 1169.68 231.101  18 
  -4   1 -23 3369.99 391.195   9 
   4   1  23 2784.00 346.614  18 
   4  -1  23 2274.87 352.768  20 
   4  -1  23 2947.50 333.319  10 
   4   1  23 2852.41 371.325  20 
   4  -1  24 157.151 76.2493  10 
   4   1  24 66.7677 19.9497  20 
   4  -1  24-20.8632 57.4679  20 
   4   1  24 156.623 72.2303  18 
   4  -1  25 12.7712 35.2439  20 
   4   1  25 84.0019 59.7466  20 
  -4   2  26 253.214 98.3720  20 
  -4  -2  26 239.457 101.239  10 
  -4  -2  26 151.275 99.0830  26 
  -4   2  25 341.596 105.094  20 
  -4  -2  25 262.085 100.016  10 
   4   2 -25 269.480 89.5255  19 
  -4   2  25 161.467 95.6471  26 
  -4   2  24 446.196 134.084  20 
  -4   2  24 643.455 201.588  26 
   4   2 -24 716.891 150.086  19 
  -4  -2  24 629.200 165.186  10 
  -4   2  23 885.278 215.872  20 
   4   2 -23 774.908 156.123  19 
  -4  -2  23 805.742 192.631  10 
  -4   2  23 715.336 214.035  26 
   4   2 -22-86.5776 52.2595  19 
  -4  -2  22-100.227 85.1152  10 
  -4   2  22 31.8316 74.4541  20 
  -4   2  22-70.0090 106.901  26 
  -4  -2  21 2413.98 371.904  10 
  -4   2  21 2109.48 420.777  26 
  -4   2  21 3037.45 409.717  20 
  -4   2  20 3129.09 432.699  20 
  -4  -2  20 3179.15 426.529  10 
  -4   2  20 3189.27 520.409  26 
  -4  -2  19 4303.64 492.146  10 
  -4   2  19 3808.34 388.683   8 
  -4   2  19 4104.05 617.069  26 
  -4   2  19 4384.20 515.694  20 
  -4   2  18 3022.61 344.660   8 
  -4  -2  18 3784.76 459.814  10 
  -4   2  18 3253.77 452.694  20 
  -4   2  18 3596.47 556.869  26 
  -4   2  17 2873.85 494.023  26 
  -4  -2  17 3261.94 345.839  13 
  -4  -2  17 3078.57 396.195  10 
  -4   2  17 2361.74 367.139  20 
  -4   2  17 3007.59 339.704   8 
  -4  -2  16 54.2072 52.6288  10 
  -4  -2  16 74.3163 40.5319  13 
  -4   2  16 174.065 100.455  20 
  -4   2  16 114.772 81.7084   8 
  -4   2  16 144.174 50.2180  24 
  -4   2  16 116.279 71.6579  25 
   4   2 -16-2.08816 30.6673  15 
  -4   2  16-44.3097 103.832  26 
  -4  -2  15 6120.92 471.037  13 
  -4   2  15 5704.78 591.937  25 
  -4   2  15 5588.58 666.201  26 
  -4  -2  15 6235.86 531.982  10 
  -4   2  15 5172.41 533.421  20 
   4   2 -15 6039.82 548.727   9 
   4   2 -15 6026.13 461.197  15 
  -4   2  15 5242.68 565.262  24 
  -4   2  15 5534.99 449.512   8 
  -4  -2  14 1076.58 216.596  10 
  -4   2  14 552.168 413.643   3 
  -4   2  14 575.105 459.297   2 
  -4  -2  14 1206.38 207.646  13 
  -4   2  14 712.096 159.992   8 
  -4   2  14 932.861 204.695  20 
  -4   2  14 988.886 222.053  25 
   4   2 -14 990.808 179.797  15 
   4   2 -14 1096.77 434.382   1 
  -4   2  14 921.317 192.557  17 
  -4   2  14 801.663 240.083  26 
   4   2 -14 952.510 209.236   9 
  -4   2  14 1086.15 240.890  24 
  -4   2  13 3228.94 319.922   8 
   4   2 -13 2633.53 330.615  22 
   4   2 -13 3116.73 383.353   9 
  -4  -2  13 3026.22 317.550  13 
  -4  -2  13 3628.69 368.166  10 
   4   2 -13 3237.95 321.932  15 
   4   2 -13 2673.70 658.009   1 
  -4   2  13 2280.70 1048.86   2 
  -4   2  13 3360.01 362.548  17 
  -4   2  13 3277.11 429.563  24 
  -4   2  13 3227.60 387.674  20 
  -4   2  13 2898.50 463.270  26 
  -4   2  13 3338.05 1140.18   3 
  -4   2  13 3154.54 405.101  25 
  -4   2  12 9577.80 721.499  25 
   4   2 -12 8898.98 1165.29   1 
  -4   2  12 8837.33 1724.86   2 
  -4  -2  12 8623.76 540.898  13 
   4   2 -12 9008.09 638.112   9 
  -4   2  12 8233.39 736.633  26 
  -4   2  12 7815.88 586.016  20 
  -4   2  12 6388.31 467.707  18 
  -4   2  12 8435.75 592.367  17 
   4   2 -12 8664.46 537.722  15 
  -4  -2  12 9666.88 593.860  10 
  -4   2  12 7722.88 1663.58   3 
   4   2 -12 8147.33 571.425  22 
  -4   2  12 8898.37 713.750  24 
  -4   2  12 7916.82 508.674   8 
  -4   2  11 5485.83 405.193   8 
  -4  -2  11 5875.45 428.420  13 
   4   2 -11 5655.64 492.087   9 
  -4   2  11 5313.52 466.160  20 
   4   2 -11 5730.55 909.856   1 
  -4   2  11 5383.17 449.542  17 
  -4   2  11 4870.91 535.045  24 
   4   2 -11 5899.64 424.755  15 
  -4   2  11 5591.45 583.014  26 
  -4  -2  11 6302.81 450.684  10 
  -4   2  11 4608.11 526.302  25 
  -4   2  10 2694.09 394.794  26 
   4   2 -10 3458.43 674.011   1 
  -4   2  10 3298.49 294.567   8 
  -4   2  10 3626.39 415.178  24 
   4   2 -10 2918.71 289.221  15 
  -4  -2  10 3218.08 305.468  10 
  -4   2  10 2505.48 296.517  17 
  -4   2  10 2724.17 312.549  20 
  -4   2  10 2967.77 390.271  25 
  -4  -2  10 2975.22 295.327  13 
   4   2 -10 2816.14 328.224   9 
  -4   2   9 6763.17 585.945  25 
   4  -2  -9 6789.63 550.450   1 
  -4   2   9 6547.42 594.997  26 
  -4   2   9 6728.84 489.119  20 
   4   2  -9 7354.08 463.777  15 
  -4  -2   9 6963.53 456.771  13 
   4   2  -9 8005.03 522.714  16 
   4   2  -9 6452.76 923.709   1 
  -4   2   9 7323.72 609.032  24 
  -4   2   8 19431.4 1013.83  25 
   4   2  -8 19478.6 1500.42   1 
   4   2  -8 21441.6 883.844  16 
  -4   2   8 19339.1 1037.65  26 
   4  -2  -8 19095.1 986.461   1 
  -4   2   8 20114.4 862.467  20 
  -4   2   8 17874.0 983.246  24 
   4   2  -7 5860.21 766.485   1 
   4  -2  -7 5475.38 517.556   1 
  -4   2   6 8295.89 746.793   1 
   4  -2  -6 9684.22 700.720   1 
   4   2  -6 10069.8 983.200   1 
   4  -2  -5 11483.7 771.400   1 
   4  -2  -5 11346.3 654.592   4 
   4   2  -5 11087.8 995.218   1 
   4  -2  -4 9633.82 592.228   4 
   4  -2  -4 8342.13 665.500   1 
   4   2  -4 8349.02 810.676   1 
   4   2  -3 2577.34 428.607   1 
   4  -2  -3 2767.94 377.867   1 
   4  -2  -3 2516.15 306.763   4 
   4   2  -2 26339.0 2062.83   5 
   4  -2  -2 25890.2 1094.04   4 
   4  -2  -2 27450.0 1327.34   1 
   4   2  -2 24388.6 1334.73   1 
   4  -2  -1 26064.9 1112.93   4 
   4   2  -1 21142.7 1827.94   5 
   4   2  -1 24124.2 1254.97   1 
   4  -2  -1 23000.3 1243.76   1 
   4   2   0 8780.50 655.588   1 
   4  -2   0 9807.52 686.846   4 
   4   2   0 7801.75 1080.55   5 
   4  -2   0 8820.35 748.501   1 
   4   2   0 10010.3 737.433   1 
   4  -2   1 29288.7 1481.35   1 
   4   2   1 27911.1 2096.01   5 
  -4  -2  -1 28633.2 1667.57   3 
  -4  -2  -1 28537.2 1656.88   2 
   4   2   1 27886.2 1179.32   1 
   4   2   1 29244.7 1188.62   4 
   4   2   1 31321.8 1303.50   1 
   4  -2   1 27907.8 1322.32   4 
   4   2   2 31371.3 1190.24   1 
   4   2   2 32021.3 1241.07   1 
   4  -2   2 31059.1 1444.36   4 
   4   2   2 27820.6 1169.56   4 
   4  -2   2 29836.7 1551.09   1 
  -4  -2  -2 30466.2 1652.67   3 
   4   2   2 29403.0 2153.97   5 
  -4  -2  -2 30225.9 1628.08   2 
  -4  -2  -3 137364. 4101.82   2 
   4   2   3 140053. 5251.59   5 
   4   2   3 129024. 3209.33   1 
   4  -2   3 139446. 3971.52   4 
   4   2   3 137353. 3466.03   4 
   4   2   3 142202. 3334.27   1 
  -4  -2  -3 146963. 4206.19   3 
   4  -2   3 144536. 4163.90   1 
   4  -2   4 55811.9 2310.35   1 
   4  -2   4 58190.4 2254.15   4 
   4   2   4 63837.8 3282.35   5 
   4   2   4 43017.2 1654.30   4 
   4   2   4 50969.0 1414.51   1 
  -4  -2  -4 55515.6 2279.75   3 
  -4  -2  -4 48734.4 2190.45   2 
   4   2   5 22498.2 1088.95   4 
   4  -2   5 23316.6 1475.65   1 
   4  -2   5 25952.0 1510.46   4 
   4   2   5 25408.8 2060.91   5 
   4  -2   6 3750.55 587.061   1 
   4   2   6 4213.66 469.736   4 
   4  -2   7 55559.9 1653.75  23 
  -4   2  -7 56006.2 1696.10  17 
   4  -2   7 54118.0 1593.11  10 
   4  -2   7 56556.8 2557.45   1 
   4  -2   8 28500.6 1080.56  23 
   4  -2   8 25174.3 1684.30   1 
  -4   2  -8 26620.5 1071.78  17 
   4  -2   8 27578.7 947.070  12 
   4  -2   8 26183.0 997.734  10 
  -4   2  -9 2219.33 268.980   6 
  -4   2  -9 1754.88 252.298  16 
   4  -2   9 2274.15 245.503  12 
   4  -2   9 2410.71 275.423  10 
  -4   2  -9 1664.84 267.712   9 
   4  -2   9 2835.95 306.139  23 
   4   2   9 2555.27 306.923  18 
   4   2   9 2663.83 315.257  21 
   4   2   9 1872.03 228.781  12 
   4  -2   9 2548.73 530.675   1 
   4  -2  10 6126.61 481.533  23 
   4   2  10 5711.39 465.818  21 
   4   2  10 5123.79 400.803  12 
  -4   2 -10 5823.61 549.133   9 
   4   2  10 5429.02 472.429  18 
   4  -2  10 5541.22 439.970  10 
   4  -2  10 6005.60 424.371  12 
   4  -2  10 5403.32 811.480   1 
   4  -2  11 10367.6 602.482  12 
   4   2  11 9849.81 592.496  12 
   4  -2  11 10170.3 630.115  10 
   4   2  11 10644.7 684.012  18 
   4  -2  11 10341.7 665.941  23 
   4  -2  11 9452.25 545.056  18 
  -4   2 -11 10224.5 756.751   9 
   4  -2  11 10445.4 1161.62   1 
   4  -2  12 15554.2 1506.98   1 
   4  -2  12 17683.4 922.586  23 
  -4   2 -12 16294.2 1027.81   9 
   4   2  12 17148.1 831.202  12 
   4   2  12 18923.6 956.234  18 
   4   2  12 17307.3 970.418  27 
   4  -2  12 17031.1 857.999  10 
   4  -2  12 17165.0 823.480  12 
   4  -2  12 16439.7 777.492  18 
  -4   2 -13 12804.3 911.236   9 
   4  -2  13 11936.2 728.401  10 
   4  -2  13 11759.6 697.211  12 
   4   2  13 13346.1 806.920  18 
   4  -2  13 11408.9 649.348  18 
   4   2  13 12786.2 834.306  27 
   4  -2  13 12185.2 780.351  23 
   4  -2  13 11348.6 1316.79   1 
   4  -2  14 7406.21 555.096  12 
   4   2  14 8718.41 653.059  18 
   4  -2  14 7101.77 522.682  18 
   4   2  14 8015.73 666.495  27 
  -4   2 -14 6751.60 690.692   9 
   4  -2  14 7131.57 565.877  10 
  -4   2 -14 7482.63 588.818  15 
   4  -2  15 3423.05 352.454  18 
  -4   2 -15 3849.91 510.844   9 
   4  -2  15 3440.46 383.220  12 
   4  -2  15 3847.20 421.050  10 
   4   2  15 3890.76 474.864  27 
   4   2  15 3353.98 402.097  18 
  -4   2 -15 3362.29 398.567  15 
  -4   2 -16 599.771 153.802  15 
  -4   2 -16 447.466 159.454   9 
   4  -2  16 544.523 148.550  18 
   4  -2  16 669.858 169.218  12 
   4   2  16 632.628 188.865  27 
   4  -2  16 550.596 162.224  10 
   4   2  16 715.402 175.348  18 
  -4   2 -17 3304.32 386.869  15 
  -4   2 -17 3219.60 476.106   9 
   4  -2  17 3447.40 413.577  10 
   4   2  17 2805.22 382.853  18 
   4   2  17 3093.87 423.119  20 
   4  -2  17 3260.71 391.523  12 
   4  -2  17 3320.13 362.550  18 
   4   2  17 3455.92 445.229  27 
  -4   2 -18 21971.9 1332.46   9 
   4   2  18 23550.5 1222.47  27 
   4   2  18 22115.3 1200.56  20 
   4  -2  18 23812.6 1057.25  18 
   4  -2  18 23588.4 1161.23  10 
  -4   2 -18 20124.6 1027.61  15 
   4   2  18 23781.1 1155.69  18 
  -4   2 -19 10896.3 897.835   9 
   4   2  19 8337.39 711.360  20 
   4   2  19 10415.9 727.415  18 
   4  -2  19 9489.86 649.589  18 
   4   2  19 10345.4 758.705  27 
   4  -2  19 10996.3 748.985  10 
   4  -2  20 2729.58 358.385  10 
   4   2  20 2625.83 375.217  20 
  -4   2 -20 3245.75 471.646   9 
   4   2  20 3368.90 393.846  18 
   4   2  20 2198.70 332.399  27 
  -4   2 -21 1192.84 269.801   9 
   4  -2  21 1274.90 230.031  10 
   4   2  21 1097.67 233.610  20 
   4   2  21 1933.74 282.200  18 
   4  -2  22 512.110 131.719  10 
   4   2  22 461.297 137.586  20 
   4   2  22 555.703 143.532  18 
  -4   2 -22 417.675 138.417   9 
   4  -2  23 2347.77 315.939  20 
  -4   2 -23 2720.18 353.816   9 
   4   2  23 2718.13 299.710  18 
   4   2  23 2663.06 323.295  20 
   4  -2  23 3119.29 328.302  10 
   4  -2  24 244.860 85.5418  10 
   4   2  24 103.313 49.1535  20 
   4  -2  24 117.001 72.2127  20 
   4   3 -25 366.677 86.4407  19 
  -4  -3  24 221.147 96.4834  10 
  -4   3  24 115.124 65.6486  20 
   4   3 -24 120.517 59.3041  19 
  -4   3  24 160.863 94.0820  26 
  -4  -3  23 523.633 143.069  10 
   4   3 -23 720.588 153.056  19 
  -4   3  23 413.018 137.355  26 
  -4   3  23 537.696 141.739  20 
  -4   3  22 3326.03 376.251  20 
   4   3 -22 2975.65 321.217  19 
  -4   3  22 2479.29 383.524  26 
  -4  -3  22 2455.07 331.150  10 
  -4   3  21 5730.38 525.399  20 
   4   3 -21 4803.75 441.641  19 
  -4  -3  21 4730.29 485.072  10 
  -4   3  21 4910.37 583.097  26 
  -4   3  20 4020.20 458.129  20 
  -4   3  20 4005.31 536.209  26 
   4   3 -20 4342.59 431.512  19 
  -4  -3  20 4619.75 487.263  10 
  -4  -3  19 38.7988 78.9189  10 
   4   3 -19 29.6099 40.1041  15 
  -4   3  19 42.1764 78.0206  20 
  -4   3  19 38.8163 31.4724  26 
  -4   3  18 8864.87 707.002  20 
   4   3 -18 8327.18 592.911  15 
  -4  -3  18 7278.66 633.981  10 
  -4   3  18 7121.35 769.031  26 
   4   3 -17 12748.4 767.160  15 
  -4  -3  17 11952.8 813.324  10 
  -4   3  17 10812.3 786.923  20 
  -4   3  17 11560.0 1019.25  26 
  -4  -3  17 12836.4 734.235  13 
  -4   3  17 10875.0 825.627  25 
  -4   3  17 10980.2 855.556  24 
  -4   3  16 3601.33 444.286  20 
  -4  -3  16 3801.80 437.420  10 
  -4   3  16 3382.72 472.255  25 
  -4   3  16 3452.94 482.082  24 
  -4   3  16 3457.29 531.942  26 
   4   3 -16 3334.11 430.756  22 
   4   3 -16 3732.95 405.266  15 
  -4  -3  16 3676.73 386.568  13 
  -4  -3  15 5261.00 471.283  13 
  -4   3  15 4221.51 523.827  25 
  -4   3  15 4771.04 637.994  26 
  -4   3  15 4649.27 503.159  20 
   4   3 -15 5233.40 482.254  15 
   4   3 -15 4684.64 509.160  22 
  -4  -3  15 5570.60 516.761  10 
  -4   3  15 4240.80 547.929  24 
  -4   3  14 2091.22 382.427  24 
   4   3 -14 1959.82 288.463  15 
  -4   3  14 1764.49 339.915  25 
  -4   3  14 1552.88 365.974  26 
  -4   3  14 1667.80 287.327  20 
   4   3 -14 1720.35 292.809  22 
  -4  -3  14 2155.28 311.954  10 
  -4  -3  14 1959.84 276.672  13 
  -4   3  13 257.597 137.273  24 
   4   3 -13 255.588 111.524  22 
  -4   3  13 211.681 131.787  25 
  -4  -3  13 375.036 116.644  13 
   4   3 -13 347.548 129.887  15 
  -4  -3  13 182.884 84.7172  10 
  -4   3  13 238.595 116.793  20 
  -4   3  13 267.038 138.648  26 
  -4   3  12 975.479 263.101  26 
  -4   3  12 1169.75 219.487  20 
  -4  -3  12 1139.87 206.968  13 
  -4  -3  12 1074.02 213.379  10 
   4   3 -12 1152.39 206.592  15 
  -4   3  12 1065.26 258.320  24 
  -4   3  12 1091.68 262.467  25 
  -4  -3  11 3717.19 374.255  13 
   4   3 -11 4168.36 458.185  16 
  -4   3  11 3598.29 508.686  26 
  -4   3  11 3729.06 483.789  25 
  -4   3  11 3959.66 508.672  24 
  -4   3  11 4434.90 393.666  14 
   4   3 -11 3704.16 821.265   1 
  -4   3  11 3379.53 380.115  20 
  -4   3  11 3872.26 399.812  17 
  -4  -3  11 4336.50 399.733  10 
   4   3 -11 3859.34 397.753  15 
   4   3 -10 14353.5 1596.33   1 
  -4  -3  10 13994.7 731.380  10 
   4   3 -10 16214.7 884.385  16 
  -4   3  10 12537.9 953.305  26 
  -4   3  10 12106.3 900.056  25 
   4   3 -10 14096.3 771.944  15 
  -4   3  10 13945.9 782.129  20 
  -4   3  10 13015.9 769.005  17 
  -4   3  10 12416.4 916.418  24 
  -4   3  10 14429.6 756.670  14 
  -4   3   9 20215.6 1008.84  17 
  -4   3   9 20068.4 1056.37  21 
   4   3  -9 24608.4 1107.82  16 
  -4   3   9 23393.5 1017.03  20 
  -4   3   9 21747.1 1227.77  24 
  -4   3   9 23891.1 1260.79  25 
  -4  -3   9 22290.1 939.222  10 
  -4   3   9 20581.9 1216.04  26 
  -4   3   9 23893.6 1008.32  14 
   4   3  -9 21875.8 984.662  15 
   4   3  -9 22540.2 1944.54   1 
  -4   3   8 3901.97 375.914  14 
  -4   3   8 3363.45 416.950  21 
  -4   3   8 3383.70 373.693  16 
  -4   3   8 3204.93 360.796  17 
  -4  -3   8 4074.57 347.660  10 
  -4   3   8 3730.89 461.825  24 
  -4   3   8 3557.47 355.390  20 
   4   3  -8 3662.94 390.749  16 
  -4   3   8 4128.33 480.768  25 
   4   3  -8 3532.34 737.069   1 
  -4   3   8 3510.59 458.791  26 
   4   3  -8 3957.60 369.860  15 
   4   3  -7 4890.66 409.425  15 
  -4   3   7 5392.18 553.830  25 
  -4  -3   7 4158.98 337.017  10 
  -4   3   7 4200.76 474.358  21 
   4   3  -7 4534.19 442.854  21 
   4   3  -7 4559.70 795.488   1 
  -4   3   7 4638.13 408.619  14 
  -4   3   7 4215.86 411.382  17 
  -4   3   7 4460.71 510.735  24 
  -4   3   7 5268.71 419.803  20 
  -4   3   7 4513.17 432.812  16 
   4   3  -7 5450.20 483.429  16 
  -4   3   7 4106.82 490.947  26 
   4   3  -6 3187.88 375.377  24 
  -4   3   6 3824.92 367.399  14 
   4   3  -6 3139.55 374.103  25 
   4   3  -6 2763.22 347.429  21 
   4   3  -6 2831.08 265.299  19 
   4   3  -6 3442.82 331.364  15 
   4   3  -6 3546.82 679.825   1 
  -4   3   6 3493.58 445.918  26 
  -4   3   6 3384.95 331.244  20 
  -4   3   6 3080.37 414.268  25 
  -4   3   6 3315.38 355.250  17 
   4   3  -6 3533.22 372.767  16 
  -4   3   6 2988.11 353.893  16 
  -4   3   6 3140.61 425.713  24 
  -4   3   6 2804.99 301.080   6 
  -4   3   5 2034.22 299.851  16 
  -4   3   5 1894.03 318.842  25 
   4  -3  -5 1505.01 299.826   1 
   4   3  -5 2155.81 296.940  25 
   4   3  -5 1854.18 206.893  19 
   4   3  -5 2671.78 546.104   1 
  -4   3   5 1970.21 324.456  26 
   4   3  -5 2005.04 277.732  16 
  -4   3   5 1229.96 206.045   6 
  -4   3   5 2075.97 324.318  24 
   4   3  -5 1933.37 303.158  21 
   4   3  -5 2127.06 256.547  15 
   4   3  -5 2472.57 315.123  24 
  -4   3   5 1928.33 274.590  17 
  -4   3   5 2126.83 270.226  14 
  -4   3   4 2638.54 360.795  26 
  -4   3   4 2426.76 329.439  16 
  -4   3   4 2353.77 283.949  14 
   4   3  -4 3176.67 377.097  21 
   4  -3  -4 2307.24 382.788   1 
  -4   3   4 2477.11 301.699  17 
   4   3  -4 2486.28 509.791   1 
  -4   3   4 2062.46 330.002  25 
   4   3  -4 2865.87 287.906  15 
   4   3  -4 3401.38 363.230  24 
  -4   3   4 2630.89 461.569   5 
  -4   3   4 2704.23 302.424   6 
   4   3  -4 3017.37 334.599  25 
   4   3  -4 2439.79 298.450  16 
  -4   3   4 2796.18 382.370  24 
   4   3  -4 2294.19 220.219  19 
  -4   3   3 1187.06 238.556  26 
   4   3  -3 1151.32 211.291  25 
  -4   3   3 1060.32 319.688   5 
  -4   3   3 1271.39 255.381  25 
   4  -3  -3 732.277 226.026   1 
   4   3  -3 1074.29 236.508  21 
   4   3  -3 1248.79 186.095  15 
  -4   3   3 1112.16 210.404  17 
  -4   3   3 871.360 176.401  14 
   4   3  -3 1161.97 320.547   1 
  -4   3   3 1159.18 220.351  16 
   4   3  -3 1159.44 535.906   5 
  -4   3   3 992.056 185.570   6 
   4   3  -3 1152.87 200.094  16 
  -4   3   3 907.494 212.836  24 
   4   3  -3 1174.75 210.751  24 
   4   3  -2 10332.5 968.009   1 
  -4   3   2 9971.17 606.368  14 
   4   3  -2 8329.31 548.639  16 
   4   3  -2 10935.3 571.150  15 
   4   3  -2 8775.94 652.237  21 
  -4   3   2 8829.45 593.410  17 
  -4   3   2 9469.17 678.370  26 
  -4   3   2 8035.40 644.227  24 
  -4   3   2 9329.83 656.937  16 
   4   3  -2 8835.04 605.811  25 
  -4   3   2 9625.52 591.453   6 
   4   3  -2 7744.04 1343.97   5 
  -4   3   2 9925.66 709.434  25 
   4   3  -2 7414.41 558.859  24 
   4  -3  -2 8821.77 814.302   1 
   4   3  -1 31225.2 1286.76  21 
   4   3  -1 26393.9 2575.30   5 
  -4   3   1 26863.4 1240.41  25 
   4   3  -1 24369.0 1066.07  22 
   4   3  -1 31189.0 1224.96  24 
  -4   3   1 30697.4 1159.81  14 
   4   3  -1 31847.1 1065.42  15 
   4  -3  -1 33264.8 1693.96   1 
  -4   3   1 29828.5 1269.90  26 
   4   3  -1 25099.5 1498.88   1 
  -4   3   1 28251.1 1155.19  17 
  -4   3   1 29416.5 1296.99  24 
   4   3  -1 25344.2 1128.97  25 
  -4   3   1 28663.4 1259.10  16 
   4   3  -1 27511.5 1077.60  16 
  -4   3   1 28376.8 1136.62   6 
   4   3   0 17062.5 855.696  24 
   4   3   0 13427.3 728.840  22 
  -4   3   0 15421.1 791.645   6 
   4   3   0 14249.4 1771.98   5 
   4   3   0 15225.6 678.755  15 
   4   3   0 14549.1 1034.39   1 
   4   3   0 12638.7 792.514  21 
  -4   3   0 16590.4 929.732  16 
   4   3   0 16757.4 767.537  16 
   4  -3   0 13470.4 1075.06   1 
  -4   3   0 15594.9 805.229  17 
  -4   3   0 18012.5 831.896  14 
  -4   3   0 17026.9 911.478  26 
   4   3   0 15558.3 825.958  25 
  -4   3   0 15062.9 867.704  25 
  -4   3   0 13037.1 828.338  24 
   4   3   1 8259.50 598.908  24 
  -4   3  -1 9050.94 654.615  25 
   4  -3   1 9250.53 930.102   1 
  -4   3  -1 9238.85 657.987  26 
   4   3   1 10462.8 701.972  21 
   4   3   1 9232.77 624.729  25 
   4   3   1 8923.26 742.505   1 
   4   3   1 9345.61 1426.01   5 
   4   3   1 10953.3 547.688  15 
  -4   3  -1 9029.75 603.729  17 
   4   3   1 7905.56 536.960  22 
  -4   3  -1 9212.25 680.699  16 
  -4   3  -1 9356.76 664.296  24 
  -4   3  -1 7322.11 545.550   6 
  -4   3  -1 8226.61 564.273  14 
   4   3   2 1212.16 203.136  22 
   4   3   2 901.858 356.863   5 
  -4   3  -2 1408.10 249.672  25 
  -4   3  -2 1454.92 225.222   9 
   4   3   2 1449.61 261.337   1 
   4   3   2 1440.31 249.224  21 
   4  -3   2 1540.08 379.351   1 
   4   3   2 1628.89 251.912  24 
   4   3   2 1689.76 257.985  25 
  -4   3  -2 1428.01 252.260  24 
  -4   3  -2 1240.13 217.397   6 
  -4   3  -2 1542.47 238.875  17 
  -4   3  -2 1545.51 237.109  14 
  -4   3  -2 1746.33 278.484  26 
  -4   3  -2 1540.33 266.714  16 
  -4   3  -3 7097.73 548.840  25 
  -4   3  -3 5629.13 465.473  14 
  -4   3  -3 6798.47 523.562   9 
   4   3   3 7957.37 568.143  25 
   4   3   3 8693.71 1354.88   5 
   4   3   3 6948.92 565.970  21 
   4  -3   3 6914.39 841.638   1 
  -4   3  -3 7693.31 565.409  17 
  -4   3  -3 7536.03 600.019  16 
  -4   3  -3 7316.69 561.154  24 
   4   3   3 7442.76 562.710  24 
  -4   3  -3 8271.62 573.889   6 
   4  -3   4 8328.45 938.618   1 
  -4   3  -4 8701.59 578.935  14 
  -4   3  -4 7530.91 562.980  24 
   4   3   4 9274.54 1383.48   5 
   4   3   4 10017.6 645.197  24 
   4   3   4 7769.20 615.167  21 
  -4   3  -4 8892.33 602.381  17 
  -4   3  -4 8958.89 632.220   9 
  -4   3  -4 7198.59 555.461  25 
  -4   3  -4 8685.48 660.425  16 
   4   3   4 8553.12 594.250  25 
  -4   3  -4 9157.20 624.157   6 
   4   3   5 730.018 180.514  24 
  -4   3  -5 818.866 188.013   6 
   4   3   5 840.754 205.717  21 
  -4   3  -5 570.301 142.081  14 
   4   3   5 831.358 173.715  25 
   4  -3   5 739.661 273.789   1 
  -4   3  -5 801.602 182.222  17 
  -4   3  -5 712.748 184.448  16 
   4   3   5 1179.60 503.424   5 
  -4   3  -5 733.139 170.929   9 
   4   3   6 3116.35 358.649  24 
   4  -3   6 3428.11 342.252  10 
   4   3   6 3480.84 366.749  25 
  -4   3  -6 3011.95 388.175  16 
  -4   3  -6 3247.48 345.738  14 
   4   3   6 2818.57 313.247  18 
  -4   3  -6 3419.81 412.216   9 
   4   3   6 3676.87 422.880  21 
  -4   3  -6 3744.84 395.698  17 
   4   3   6 3196.33 862.661   5 
  -4   3  -6 3725.31 393.248   6 
   4  -3   6 3269.99 608.513   1 
   4   3   7 9014.82 589.905  18 
   4   3   7 7576.62 576.306  25 
   4  -3   7 10282.7 633.710  10 
   4   3   7 10965.8 736.596  21 
  -4   3  -7 9726.15 731.589   9 
  -4   3  -7 9808.59 730.384  16 
  -4   3  -7 9878.46 620.230  14 
   4  -3   7 10703.2 1180.66   1 
  -4   3  -7 10954.1 725.804  17 
   4   3   7 12269.7 722.742  24 
  -4   3  -7 10681.3 708.440   6 
  -4   3  -8 6509.11 597.530   9 
   4   3   8 5453.99 460.967  18 
   4  -3   8 6740.25 967.801   1 
  -4   3  -8 5600.77 459.493  14 
   4   3   8 7186.99 535.073  25 
  -4   3  -8 6014.95 566.781  16 
   4  -3   8 6184.46 489.894  10 
   4   3   8 5166.72 518.791  21 
   4   3   8 6839.54 532.407  24 
   4  -3   9 4792.63 818.123   1 
   4   3   9 5062.81 484.776  21 
   4   3   9 4280.02 406.298  18 
   4  -3   9 4770.54 439.865  10 
  -4   3  -9 4642.75 493.603  16 
  -4   3  -9 4590.23 530.486   9 
  -4   3 -10 12372.2 792.142  15 
  -4   3 -10 13322.6 943.854   9 
   4   3  10 11123.7 704.237  18 
  -4   3 -10 12731.4 836.357  16 
   4   3  10 15032.9 864.343  21 
   4  -3  10 12739.4 763.027  10 
  -4   3 -11 29654.5 1498.70   9 
   4  -3  11 29037.4 1239.61  10 
   4   3  11 25688.0 1157.67  18 
  -4   3 -11 27566.5 1273.29  16 
   4   3  11 28414.2 1259.13  21 
  -4   3 -11 27591.5 1270.17  15 
   4   3  12 5008.99 490.947  21 
  -4   3 -12 5758.99 642.620   9 
   4   3  12 6836.66 550.819  18 
  -4   3 -12 6275.24 571.872  15 
   4   3  12 6525.40 604.180  27 
  -4   3 -12 6188.13 555.026  16 
   4  -3  12 6576.32 550.968  10 
   4   3  13 4609.97 450.280  18 
   4   3  13 2768.42 346.479  20 
   4  -3  13 4290.21 447.799  10 
   4   3  13 4651.56 500.569  27 
  -4   3 -13 3939.30 458.558  15 
  -4   3 -13 3623.44 527.055   9 
   4   3  14 2242.15 342.169  27 
  -4   3 -14 2273.16 426.046   9 
   4  -3  14 2274.85 338.900  10 
   4   3  14 1937.46 297.345  20 
  -4   3 -14 1986.77 325.869  15 
   4   3  14 2515.88 336.672  18 
   4   3  15-1.85855 27.5576  20 
  -4   3 -15-27.6676 60.7970   9 
   4  -3  15 20.1706 51.9603  10 
  -4   3 -15 23.7324 41.4567  15 
   4   3  15 55.4557 52.0014  27 
   4   3  15 50.4870 47.9684  18 
  -4   3 -16 2829.01 462.957   9 
   4   3  16 3345.88 418.878  27 
   4   3  16 2131.81 317.705  20 
   4   3  16 2869.94 362.778  18 
   4  -3  16 3020.60 395.231  10 
  -4   3 -16 3357.68 417.086  15 
   4  -3  17 1689.90 285.730  10 
  -4   3 -17 1636.07 336.820   9 
   4   3  17 1618.37 269.130  20 
   4   3  17 1722.90 277.330  18 
  -4   3 -17 1726.58 293.545  15 
  -4   3 -18 2272.91 390.563   9 
   4   3  18 2453.03 311.319  18 
   4   3  18 1651.08 277.606  20 
   4  -3  18 2190.23 324.753  10 
  -4   3 -18 2329.41 335.505  15 
   4   3  19 94.2448 48.7540  18 
  -4   3 -19 204.334 118.528   9 
   4   3  19 86.1266 71.5061  20 
  -4   3 -19 51.7215 61.2541  15 
   4  -3  19 225.096 100.739  10 
  -4   3 -20 210.501 115.147   9 
  -4   3 -20 338.502 109.872  15 
   4   3  20 294.349 102.996  18 
   4  -3  20 336.908 124.350  10 
   4   3  20 212.132 101.103  20 
   4  -3  21 1259.04 220.880  10 
   4   3  21 1039.43 180.370  20 
   4   3  21 1356.15 200.081  18 
  -4   3 -21 1341.23 279.405   9 
   4  -3  22 4253.40 386.837  10 
   4   3  22 3360.08 291.214  18 
  -4   3 -22 4075.06 432.910   9 
   4  -3  23 628.909 137.176  10 
   4   4 -23 490.638 101.390  19 
   4   4 -22 6445.99 419.406  19 
  -4  -4  22 5554.91 417.373  10 
  -4   4  21 2284.15 325.475  26 
   4   4 -21 2625.25 280.107  19 
  -4  -4  21 2732.24 302.025  10 
  -4  -4  20 440.561 122.691  10 
   4   4 -20 518.032 135.962  19 
  -4   4  20 406.230 147.005  26 
  -4   4  19 4295.33 418.788  20 
  -4   4  19 4305.31 509.988  26 
   4   4 -19 4607.31 413.856  19 
   4   4 -19 4973.87 425.237  15 
  -4  -4  19 4788.99 447.150  10 
   4   4 -18 517.494 145.597  11 
   4   4 -18 654.856 157.505  19 
  -4   4  18 490.056 177.821  26 
   4   4 -18 603.540 160.115  15 
  -4  -4  18 715.770 182.369  10 
   4   4 -18 479.468 141.619  22 
  -4   4  18 670.561 168.642  20 
  -4   4  17 797.247 203.886  24 
  -4   4  17 691.775 197.870  25 
  -4   4  17 635.737 166.504  20 
  -4  -4  17 701.930 159.488  13 
   4   4 -17 875.219 191.353  19 
   4   4 -17 674.877 191.386  22 
  -4   4  17 660.550 221.074  26 
   4   4 -17 719.237 197.934  11 
   4   4 -17 743.484 182.317  15 
  -4  -4  17 789.379 179.838  10 
  -4   4  16 18927.4 1156.46  24 
   4   4 -16 19237.6 1094.88  22 
   4   4 -16 20265.0 998.396  19 
  -4   4  16 21517.5 1070.40  20 
  -4   4  16 18091.5 1114.53  25 
   4   4 -16 21430.2 1067.86  15 
  -4   4  16 18881.8 1248.23  26 
  -4  -4  16 20404.9 972.169  13 
  -4  -4  16 21500.6 1065.54  10 
  -4  -4  15 2132.88 319.609  10 
   4   4 -15 2109.47 350.832  22 
  -4   4  15 2027.70 395.868  26 
  -4  -4  15 2336.51 306.560  13 
  -4   4  15 2304.13 322.463  20 
  -4   4  15 1750.41 367.523  25 
  -4   4  15 2161.84 399.414  24 
   4   4 -15 2560.14 347.349  15 
   4   4 -15 2232.59 307.921  19 
  -4  -4  14 186.835 88.6673  10 
   4   4 -14 37.2224 34.2348  19 
  -4   4  14 37.1478 37.7436  24 
   4   4 -14 41.5477 80.6555  22 
  -4   4  14 177.048 83.3349  20 
   4   4 -14 115.353 65.0409  15 
  -4  -4  14 126.157 56.7990  13 
  -4   4  14 171.196 115.067  25 
  -4   4  14 98.5839 68.4899  26 
  -4   4  13 79.3364 97.1949  24 
  -4  -4  13 145.145 88.1438  13 
   4   4 -13-19.9848 15.5523  22 
   4   4 -13-38.2786 76.7114  15 
   4   4 -13 38.9073 36.6458  19 
  -4   4  13 11.3521 74.6791  26 
  -4   4  13-38.3348 51.9272  20 
  -4  -4  13 87.9146 66.4499  10 
  -4   4  13 165.377 128.948  25 
   4   4 -12 423.898 157.561  15 
  -4  -4  12 380.420 128.745  13 
  -4   4  12 485.185 202.879  25 
  -4  -4  12 446.722 136.700  10 
  -4   4  12 493.207 139.649  20 
  -4   4  12 155.551 137.045  24 
   4   4 -12 556.374 142.481  19 
  -4   4  12 532.006 217.809  26 
   4   4 -12 294.484 145.939  22 
  -4  -4  11 1359.29 251.301  10 
  -4   4  11 1700.61 368.798  24 
  -4   4  11 1714.81 368.650  25 
  -4   4  11 2195.95 307.552  20 
   4   4 -11 1678.51 251.257  19 
   4   4 -11 1394.93 299.686  22 
  -4   4  11 1442.23 374.428  26 
  -4   4  11 1457.04 259.280  14 
  -4  -4  11 1812.63 285.534  13 
   4   4 -11 2078.62 346.163  16 
   4   4 -11 1642.15 288.832  15 
  -4   4  10 4461.32 450.207  14 
  -4  -4  10 3815.13 401.871  10 
  -4   4  10 4124.22 542.725  21 
   4   4 -10 3931.99 380.984  19 
   4   4 -10 4532.12 471.162  15 
   4   4 -10 4219.10 503.086  16 
  -4   4  10 3993.29 557.868  26 
   4   4 -10 4142.57 506.527  22 
  -4   4  10 3600.01 540.967  25 
  -4   4  10 4701.06 598.676  24 
  -4   4   9 695.828 214.753  24 
   4   4  -9 1078.60 234.904  21 
  -4   4   9 1086.13 281.440  26 
  -4   4   9 842.304 191.531  17 
  -4   4   9 1082.49 224.415  14 
  -4   4   9 801.112 247.864  21 
   4   4  -9 1067.67 186.696  19 
  -4   4   9 605.579 209.273  25 
  -4  -4   9 807.472 177.911  10 
   4   4  -9 799.589 190.104  15 
   4   4  -9 1083.64 262.596  16 
   4   4  -8 2307.48 362.380  21 
  -4   4   8 2426.82 341.080  14 
  -4   4   8 2036.34 387.354  25 
  -4  -4   8 2679.64 313.178  10 
  -4   4   8 2495.41 340.516  16 
  -4   4   8 1747.53 364.053  21 
   4   4  -8 2660.65 294.383  19 
   4   4  -8 2692.03 381.726  16 
  -4   4   8 2504.25 430.929  26 
  -4   4   8 1837.37 376.896  24 
  -4   4   8 2281.66 324.252  17 
   4   4  -8 1917.21 293.350  15 
  -4   4   7 2256.09 390.333  21 
   4   4  -7 2845.27 393.208  16 
  -4   4   7 1941.62 385.204  25 
   4   4  -7 2494.43 385.231  21 
  -4   4   7 2657.44 345.579  17 
   4   4  -7 2588.98 340.989  15 
   4   4  -7 2347.34 268.745  19 
  -4   4   7 2373.81 333.395  14 
  -4   4   7 2639.67 441.192  26 
  -4   4   7 2094.85 397.369  24 
  -4   4   7 2042.13 325.020  16 
  -4  -4   7 2156.71 271.736  10 
  -4   4   6 2760.15 370.467  14 
  -4   4   6 3086.25 450.452  26 
   4   4  -6 2052.77 578.942   1 
   4   4  -6 3257.81 422.259  16 
   4   4  -6 2653.54 420.611  24 
   4   4  -6 2872.96 428.222  25 
   4   4  -6 2556.88 329.720  15 
  -4   4   6 2681.19 433.177  21 
   4   4  -6 2557.61 273.418  19 
  -4   4   6 2493.94 371.250  16 
   4   4  -6 3013.74 421.218  21 
  -4   4   6 2860.83 452.167  24 
  -4   4   6 2811.17 462.476  25 
  -4   4   6 2821.18 366.480  17 
   4   4  -5 2546.14 609.463   1 
  -4   4   5 3076.21 382.561  17 
   4   4  -5 2804.51 279.266  19 
  -4   4   5 2256.36 400.156  21 
   4   4  -5 3395.20 444.281  25 
   4   4  -5 3073.42 433.094  21 
  -4   4   5 3043.15 439.345  26 
   4   4  -5 3068.33 435.813  24 
   4   4  -5 3268.50 369.600  15 
  -4   4   5 3595.35 451.967  16 
  -4   4   5 2941.53 457.297  24 
   4   4  -5 2881.95 386.231  16 
  -4   4   5 3030.47 387.265  14 
  -4   4   5 2627.25 449.140  25 
   4   4  -4 3582.03 471.176  24 
  -4   4   4 3705.70 416.896  14 
   4   4  -4 2425.85 862.413   5 
   4   4  -4 3578.51 428.485  22 
  -4   4   4 3120.96 484.840  21 
   4   4  -4 3882.71 320.627  19 
  -4   4   4 3420.83 419.831  17 
  -4   4   4 3869.73 526.316  25 
   4   4  -4 3703.68 432.266  16 
   4   4  -4 3744.22 467.554  25 
   4   4  -4 4023.83 503.322  21 
   4   4  -4 2367.86 604.435   1 
  -4   4   4 4312.45 520.629  26 
   4   4  -4 2926.42 340.323  15 
  -4   4   4 4047.40 492.081  16 
  -4   4   4 4040.02 535.980  24 
  -4   4   3 613.096 198.462  16 
  -4   4   3 686.332 205.421  25 
   4   4  -3 629.396 183.275  16 
   4   4  -3 716.087 194.398  22 
   4   4  -3 211.989 392.293   5 
  -4   4   3 507.960 170.152  21 
  -4   4   3 576.437 198.043  24 
   4   4  -3 545.453 190.741  21 
  -4   4   3 550.628 181.928  26 
   4   4  -3 683.583 205.365  24 
  -4   4   3 456.770 155.100  17 
   4   4  -3 534.483 189.279  25 
   4   4  -3 306.866 181.306   1 
  -4   4   3 583.109 159.715  14 
   4   4  -3 541.292 140.946  15 
   4   4  -2 14374.2 791.480  15 
  -4   4   2 15800.9 1026.68  16 
  -4   4   2 16818.1 940.867  17 
   4   4  -2 18404.9 1060.03  25 
  -4   4   2 18738.1 1198.22  21 
   4   4  -2 17870.6 1093.40  21 
   4   4  -2 17620.4 1049.51  24 
  -4   4   2 17914.2 983.037  14 
   4   4  -2 14231.1 892.917  22 
  -4   4   2 14669.1 1024.18  25 
  -4   4   2 17063.0 1073.26  26 
   4   4  -2 18106.2 961.470  16 
   4   4  -2 15288.9 2279.40   5 
  -4   4   2 17384.6 1108.07  24 
   4   4  -1 4562.68 545.933  21 
  -4   4   1 4310.27 456.254  14 
   4   4  -1 3293.54 403.343  22 
   4   4  -1 3574.27 1059.92   5 
   4   4  -1 4445.90 512.375  24 
   4   4  -1 5502.57 560.442  25 
  -4   4   1 5103.01 553.450  26 
  -4   4   1 4744.62 482.110  17 
  -4   4   1 4329.32 546.055  24 
  -4   4   1 4683.28 392.823  15 
   4   4  -1 4835.11 484.483  16 
  -4   4   1 3404.53 454.470  16 
  -4   4   1 4401.57 539.403  25 
   4   4  -1 4111.01 394.869  15 
  -4   4   0 37438.3 1522.80  14 
  -4   4   0 37120.6 1670.30  16 
   4   4   0 35342.6 1644.85  21 
   4   4   0 35542.1 1574.25  24 
   4  -4   0 33350.4 1992.24   1 
  -4   4   0 45231.4 1801.02  26 
  -4   4   0 34540.3 1297.22  15 
  -4   4   0 40540.3 1576.12  17 
   4   4   0 34492.5 3372.08   5 
   4   4   0 43657.9 1534.48  16 
   4   4   0 38543.7 1352.22  15 
   4   4   0 41297.6 1663.18  25 
   4   4   0 34968.0 1456.79  22 
  -4   4   0 40045.2 1730.15  25 
  -4   4   0 38960.8 1725.50  24 
  -4   4  -1 373.654 133.490  26 
   4  -4   1 409.299 223.189   1 
   4   4   1 392.247 150.570  21 
   4   4   1 242.620 89.5353  16 
   4   4   1 201.087 97.4542  22 
  -4   4  -1 366.902 131.647  14 
   4   4   1 481.844 163.763  24 
   4   4   1 586.693 182.868  25 
  -4   4  -1 436.217 165.737  25 
  -4   4  -1 250.770 48.6384  16 
  -4   4  -1 421.766 151.270  17 
  -4   4  -1 441.018 163.363  24 
  -4   4  -1 357.109 117.608  15 
   4   4   1 411.247 110.503  15 
   4   4   1 482.048 367.457   5 
   4   4   2 19393.3 1088.09  24 
   4   4   2 18266.1 927.565  16 
  -4   4  -2 19777.8 1062.79   9 
   4   4   2 19595.7 972.497  11 
  -4   4  -2 16850.1 872.758  15 
   4  -4   2 19576.8 1575.50   1 
  -4   4  -2 19489.5 1024.02  14 
   4   4   2 18449.9 2352.55   5 
  -4   4  -2 16655.7 1083.19  16 
  -4   4  -2 19518.8 1048.17  17 
  -4   4  -2 17523.6 1074.29  25 
   4   4   2 21169.9 1206.57  21 
   4   4   2 19256.6 1079.86  25 
   4   4   2 19550.4 969.185  22 
  -4   4  -2 21013.2 1165.70  24 
  -4   4  -3 1144.62 249.857  25 
   4   4   3 1439.86 236.289  16 
  -4   4  -3 1177.42 263.063  24 
   4  -4   3 1074.35 356.827   1 
  -4   4  -3 1256.14 228.901  15 
  -4   4  -3 1196.18 249.021  14 
   4   4   3 1045.59 205.436  22 
   4   4   3 586.716 431.315   5 
   4   4   3 959.269 234.721  25 
   4   4   3 1136.93 277.462  21 
   4   4   3 998.262 191.596  11 
  -4   4  -3 1326.32 262.047  17 
   4   4   3 1166.53 256.073  24 
  -4   4  -3 1142.63 262.090  16 
  -4   4  -3 1277.16 260.898   9 
  -4   4  -4 12464.1 858.862  24 
   4  -4   4 11252.1 1286.12   1 
  -4   4  -4 12217.6 866.023   9 
  -4   4  -4 12537.2 854.830  25 
   4   4   4 13466.0 1977.89   5 
   4   4   4 14091.9 903.311  24 
  -4   4  -4 13957.1 804.454  15 
   4   4   4 11778.8 830.199  25 
  -4   4  -4 11846.7 891.171  16 
   4   4   4 9821.88 658.400  11 
  -4   4  -4 14057.5 885.748  17 
  -4   4  -4 12107.9 798.342  14 
   4   4   4 13798.0 755.979  22 
   4   4   4 14755.1 966.025  21 
  -4   4  -5 7021.73 574.793  15 
  -4   4  -5 6630.45 583.526  14 
  -4   4  -5 8576.65 689.706  17 
   4   4   5 9097.33 747.688  21 
  -4   4  -5 7276.91 638.165  24 
  -4   4  -5 7092.34 664.976   9 
   4   4   5 9074.55 716.891  24 
  -4   4  -5 7330.84 619.401  25 
   4   4   5 7401.42 637.304  25 
  -4   4  -5 6896.63 682.276  16 
  -4   4  -6 43534.0 1693.90  24 
  -4   4  -6 41804.4 1819.16   9 
  -4   4  -6 43377.3 1673.96  25 
  -4   4  -6 52504.9 1789.60  14 
   4  -4   6 43727.0 1622.29  10 
  -4   4  -6 40845.8 1824.07  16 
   4   4   6 53828.5 1900.93  24 
  -4   4  -6 43606.8 1795.25  17 
  -4   4  -6 40384.5 1617.53  15 
   4   4   6 48795.2 1926.32  21 
   4   4   6 40850.0 1688.21  25 
  -4   4  -7 1541.70 280.050  14 
   4   4   7 1586.49 294.555  24 
   4   4   7 1204.58 270.495  21 
  -4   4  -7 1436.58 294.146   9 
   4  -4   7 1617.81 269.433  10 
  -4   4  -7 1402.74 303.051  16 
   4   4   7 1616.48 300.698  25 
  -4   4  -7 1406.36 263.828  15 
   4   4   8 2913.97 387.265  24 
  -4   4  -8 2166.10 315.592  14 
  -4   4  -8 2233.91 393.963   9 
  -4   4  -8 2441.43 404.540  21 
   4   4   8 2875.28 408.174  21 
  -4   4  -8 2440.29 361.324  15 
   4   4   8 2807.88 381.721  25 
   4  -4   8 2619.75 352.768  10 
  -4   4  -8 2320.38 399.847  16 
  -4   4  -9 662.609 200.167  21 
  -4   4  -9 814.169 230.048  16 
   4   4   9 601.920 168.380  24 
   4   4   9 810.954 242.611  21 
  -4   4  -9 919.403 264.878   9 
   4  -4   9 653.959 178.782  10 
  -4   4  -9 840.174 200.374  15 
   4   4   9 633.842 173.548  25 
  -4   4 -10 378.747 162.428  15 
  -4   4 -10 316.179 147.149  21 
  -4   4 -10 418.100 177.299   9 
   4   4  10 388.326 145.095  21 
   4   4  10 313.868 140.206  24 
  -4   4 -10 520.742 174.316  16 
   4  -4  10 373.614 130.162  10 
   4   4  10 519.856 161.676  25 
  -4   4 -11 2470.99 446.505   9 
  -4   4 -11 2444.47 389.603  21 
   4   4  11 2006.86 324.575  21 
  -4   4 -11 2285.46 373.617  16 
  -4   4 -11 2229.10 361.594  15 
   4  -4  11 2650.77 365.085  10 
   4   4  12 11520.7 802.835  27 
   4   4  12 10088.7 744.983  21 
  -4   4 -12 10443.7 792.078  15 
  -4   4 -12 11519.4 970.872   9 
   4  -4  12 11524.7 792.508  10 
  -4   4 -12 12106.3 859.016  16 
   4  -4  13 780.768 195.414  10 
  -4   4 -13 902.747 259.183   9 
   4   4  13 631.992 191.667  27 
  -4   4 -13 1028.50 233.081  16 
  -4   4 -13 1172.68 264.443  15 
   4  -4  14 1341.72 258.715  10 
  -4   4 -14 1230.74 244.550  16 
  -4   4 -14 1226.40 317.122   9 
  -4   4 -14 1027.14 253.920  15 
   4  -4  15 353.956 139.057  10 
  -4   4 -15 442.403 179.153   9 
  -4   4 -15 418.564 157.863  15 
   4  -4  16 6102.40 551.839  10 
  -4   4 -16 6027.51 555.441  15 
  -4   4 -16 6040.21 675.219   9 
   4  -4  17 166.787 88.9985  10 
  -4   4 -17 159.976 86.0175   9 
  -4   4 -17 153.822 84.6878  15 
   4  -4  18 8956.96 626.161  10 
  -4   4 -18 9045.21 622.355  15 
  -4   4 -18 8325.62 743.529   9 
   4  -4  19 4609.47 431.677  10 
  -4   4 -19 5065.59 546.783   9 
  -4   4 -19 5088.26 427.056  15 
   4  -4  20 4596.27 395.712  10 
  -4   4 -20 4568.44 364.471  15 
  -4   4 -20 4974.02 498.613   9 
   4  -4  21 2521.30 265.062  10 
   4   5 -19 234.826 70.7721  19 
  -4   5  18 208.963 91.2793  26 
   4   5 -18 388.107 114.852  22 
   4   5 -18 409.680 115.770  11 
   4   5 -18 347.490 90.2795  19 
  -4   5  17 233.350 101.449  26 
   4   5 -17 353.361 105.924  19 
   4   5 -17 238.295 99.6527  15 
   4   5 -17 431.382 123.513  22 
   4   5 -17 343.494 116.385  11 
   4   5 -16 2503.96 342.696  22 
  -4   5  16 1763.79 312.062  26 
   4   5 -16 2180.10 295.881  15 
  -4  -5  16 1653.58 238.812  10 
   4   5 -16 2203.97 260.670  19 
  -4   5  16 1697.80 288.940  24 
   4   5 -16 2146.99 314.347  11 
  -4   5  16 1728.30 280.030  25 
   4   5 -15 530.423 148.746  15 
  -4   5  15 250.880 141.732  24 
   4   5 -15 448.232 123.798  19 
   4   5 -15 570.934 172.051  22 
   4   5 -15 406.041 131.560  11 
  -4  -5  15 612.175 147.784  10 
  -4  -5  15 413.106 125.696  13 
  -4   5  15 247.944 91.5333  25 
  -4   5  15 352.877 173.198  26 
  -4   5  14 3239.84 444.094  24 
  -4   5  14 3032.01 424.191  25 
   4   5 -14 3153.90 432.147  22 
   4   5 -14 3254.62 335.408  19 
  -4  -5  14 3355.30 355.338  10 
   4   5 -14 3961.81 425.524  15 
  -4   5  14 2859.47 453.766  26 
  -4  -5  14 2968.76 338.750  13 
   4   5 -14 3003.69 426.285  11 
  -4  -5  13 3327.23 366.828  13 
  -4   5  13 2600.94 418.449  24 
   4   5 -13 3293.53 449.367  22 
   4   5 -13 3386.22 343.096  19 
  -4   5  13 3122.20 489.648  26 
  -4  -5  13 3586.22 373.409  10 
   4   5 -13 4077.69 447.711  15 
  -4   5  13 3675.16 483.771  25 
  -4  -5  12 4965.12 468.575  13 
  -4  -5  12 5012.65 443.284  10 
   4   5 -12 4783.06 416.666  19 
  -4   5  12 4862.61 587.634  24 
   4   5 -12 5259.40 575.479  22 
   4   5 -12 5592.43 530.106  15 
  -4   5  12 5103.38 604.086  25 
  -4   5  12 4275.42 589.983  26 
  -4   5  11 1961.56 379.167  26 
  -4   5  11 1653.46 333.905  25 
  -4   5  11 2161.60 343.678  21 
   4   5 -11 2161.29 366.996  22 
  -4  -5  11 2458.27 330.379  13 
   4   5 -11 2080.88 341.706  15 
  -4   5  11 2255.69 413.509  24 
   4   5 -11 2258.07 273.060  19 
  -4   5  10 231.350 135.758  21 
   4   5 -10 397.557 114.217  19 
  -4   5  10 204.498 116.467  25 
  -4   5  10 259.983 161.540  26 
  -4   5  10 341.138 148.374  24 
   4   5 -10 442.494 178.953  22 
   4   5 -10 219.277 87.5044  15 
  -4   5   9 198.557 122.054  14 
  -4   5   9 51.4057 37.6514  21 
   4   5  -9 88.4157 66.3887  22 
   4   5  -9 163.643 73.1360  19 
   4   5  -9 392.297 195.003  16 
  -4   5   9 221.545 132.904  26 
   4   5  -9 84.8284 107.163  21 
   4   5  -9 306.110 137.576  15 
  -4   5   9-45.7397 81.8050  24 
  -4   5   9 54.1401 101.399  25 
   4   5  -8 53.8305 43.5187  15 
  -4   5   8-22.0652 40.6189  21 
   4   5  -8 39.0820 94.5198  21 
  -4   5   8 104.225 131.904  26 
  -4   5   8 18.9711 56.8828  14 
  -4   5   8 132.141 108.904  25 
   4   5  -8 14.6975 96.7162  22 
  -4   5   8 132.242 141.259  24 
   4   5  -8 122.875 82.5119  16 
  -4   5   7 362.087 169.425  21 
  -4   5   7 232.677 164.615  24 
   4   5  -7 382.537 196.450  21 
   4   5  -7 232.079 140.037  22 
   4   5  -7 277.461 107.133  15 
  -4   5   7 281.934 161.194  25 
  -4   5   7 140.179 93.9795  16 
  -4   5   7 358.844 147.074  14 
   4   5  -7 393.112 164.200  16 
  -4   5   7 184.659 123.962  26 
   4   5  -6 939.821 217.022  15 
  -4   5   6 746.700 208.524  14 
   4   5  -6 988.426 278.078  21 
  -4   5   6 819.515 268.984  26 
  -4   5   6 722.296 258.615  21 
   4   5  -6 796.015 238.314  22 
  -4   5   6 824.870 250.407  24 
  -4   5   6 699.352 176.209  17 
  -4   5   6 753.445 207.433  16 
   4   5  -6 539.591 179.795  16 
  -4   5   6 706.957 208.892  25 
  -4   5   5 2670.52 455.839  24 
   4   5  -5 2995.84 457.817  24 
   4   5  -5 2759.18 457.058  21 
  -4   5   5 2694.69 460.505  21 
   4   5  -5 3111.40 433.135  16 
  -4   5   5 2824.63 469.981  26 
   4   5  -5 2280.36 398.184  22 
  -4   5   5 2641.63 366.660  17 
   4   5  -5 3224.38 393.602  15 
  -4   5   5 2625.54 398.999  16 
  -4   5   5 2579.78 397.021  14 
   4   5  -5 3457.57 488.916  25 
  -4   5   5 2411.06 435.550  25 
   4   5  -4 605.132 159.103  15 
   4   5  -4 970.421 259.513  25 
  -4   5   4 825.677 269.380  25 
   4   5  -4 753.698 208.001  22 
  -4   5   4 975.987 267.805  24 
   4   5  -4 715.241 229.543  24 
  -4   5   4 735.019 228.186  21 
  -4   5   4 944.605 236.957  14 
   4   5  -4 842.243 254.148  21 
  -4   5   4 971.310 238.695  17 
   4   5  -4 1131.89 262.867  16 
  -4   5   4 537.242 161.200  16 
  -4   5   4 1049.95 272.572  26 
   4   5  -3 4466.85 572.010  24 
  -4   5   3 4316.95 552.240  16 
  -4   5   3 5363.66 628.399  26 
   4   5  -3 4085.92 433.046  15 
   4   5  -3 4294.96 563.034  21 
  -4   5   3 4378.86 603.131  24 
  -4   5   3 5271.90 659.083  21 
  -4   5   3 5301.55 534.337  17 
  -4   5   3 5378.49 575.661  14 
   4   5  -3 4507.13 531.731  22 
  -4   5   3 4932.96 617.783  25 
   4   5  -3 5635.18 631.634  25 
   4   5  -3 4844.44 537.301  16 
  -4   5   2 2589.69 448.362  24 
   4   5  -2 2908.94 446.440  24 
  -4   5   2 2177.41 432.320  21 
   4   5  -2 2438.78 438.637  21 
  -4   5   2 2557.24 420.172  16 
   4   5  -2 2274.47 363.738  22 
  -4   5   2 2532.98 426.941  25 
   4   5  -2 2476.29 382.161  16 
  -4   5   2 2380.02 359.963  17 
  -4   5   2 1863.61 332.263  14 
   4   5  -2 2219.29 317.094  15 
   4   5  -2 2418.79 400.067  25 
   4   5  -1 1258.42 262.650  22 
   4   5  -1 1003.26 286.351  21 
  -4   5   1 1479.00 295.321  14 
  -4   5   1 1129.28 288.565  25 
  -4   5   1 1234.15 337.269  21 
   4   5  -1 1369.11 321.261  24 
   4   5  -1 637.930 195.821  11 
  -4   5   1 1297.81 313.570  24 
  -4   5   1 1074.49 290.519  16 
  -4   5   1 1142.06 265.338  17 
   4   5  -1 1395.14 265.592  16 
   4   5  -1 1149.15 288.750  25 
  -4   5   0 12885.9 998.379  24 
  -4   5   0 11405.6 929.506  25 
  -4   5   0 10743.0 984.915  21 
   4   5   0 8135.70 709.624  11 
  -4   5   0 9992.65 643.706  15 
   4   5   0 11305.6 831.712  22 
  -4   5   0 13618.9 901.727  17 
   4   5   0 12010.2 814.582  16 
   4   5   0 13062.2 965.380  24 
   4   5   0 10587.2 918.729  21 
   4   5   0 11193.4 894.134  25 
  -4   5   0 10675.5 896.232  16 
  -4   5   0 10567.8 827.032  14 
   4   5   1 5783.69 646.265  24 
   4   5   1 5411.96 519.297  16 
   4   5   1 5718.11 662.722  21 
  -4   5  -1 5601.02 485.318  15 
  -4   5  -1 5728.32 633.763  16 
   4   5   1 3863.52 453.278  22 
  -4   5  -1 5095.16 688.778  21 
   4   5   1 4331.99 478.327  11 
  -4   5  -1 5316.48 562.295  17 
  -4   5  -1 5348.81 627.656  24 
  -4   5  -1 4673.56 542.243  14 
  -4   5  -1 5313.08 615.369  25 
   4   5   1 7013.18 704.359  25 
   4   5   2 39701.8 1742.24  25 
  -4   5  -2 29669.0 1565.23  16 
  -4   5  -2 32638.7 1512.76  14 
   4   5   2 30791.6 1634.06  21 
   4   5   2 23228.6 1232.80  11 
  -4   5  -2 29497.8 1272.78  15 
  -4   5  -2 28775.5 1686.29  21 
  -4   5  -2 33298.7 1567.38  17 
   4   5   2 38727.3 1477.60  16 
   4   5   2 34207.7 1647.03  24 
  -4   5  -2 30297.2 1568.79  25 
   4   5   2 32208.3 1383.57  22 
  -4   5  -2 32838.0 1619.78  24 
  -4   5  -3 1462.52 300.766  14 
   4   5   3 1948.94 354.414  25 
   4   5   3 2123.31 373.890  24 
   4   5   3 1549.55 263.802  22 
  -4   5  -3 1913.08 405.364  21 
   4   5   3 1763.02 383.096  21 
   4   5   3 1650.92 279.714  11 
  -4   5  -3 1633.35 269.387  15 
  -4   5  -3 1713.22 342.221  24 
  -4   5  -3 1757.96 374.191  16 
  -4   5  -3 2030.49 367.674  25 
   4   5   4 318.745 145.778  24 
  -4   5  -4 138.080 68.8246  14 
   4   5   4 255.867 153.764  21 
   4   5   4 289.030 150.856  25 
  -4   5  -4 254.797 140.259  24 
   4  -5   4 243.178 130.749  10 
  -4   5  -4 351.094 214.278  21 
  -4   5  -4 226.515 121.710  16 
  -4   5  -4 361.265 182.337  25 
  -4   5  -4 361.110 157.784  15 
  -4   5  -5 4399.06 524.766  24 
  -4   5  -5 4259.83 586.749  21 
   4   5   5 5133.56 595.307  24 
   4   5   5 4208.88 546.591  25 
  -4   5  -5 4591.62 511.713  14 
   4   5   5 3629.86 525.384  21 
  -4   5  -5 4775.14 593.906  16 
   4  -5   5 4288.80 469.941  10 
  -4   5  -5 4658.49 525.103  25 
  -4   5  -5 4448.97 472.051  15 
  -4   5  -6 2074.80 338.102  24 
   4   5   6 1407.05 314.724  25 
  -4   5  -6 2073.44 341.857  14 
   4   5   6 2402.68 411.044  24 
   4  -5   6 1924.80 314.918  10 
   4   5   6 1730.57 347.620  21 
  -4   5  -6 2050.19 396.242  16 
  -4   5  -6 1902.54 413.541  21 
  -4   5  -6 1857.49 330.734  25 
  -4   5  -6 1960.70 313.804  15 
   4   5   7 539.159 221.969  21 
   4   5   7 571.616 204.224  25 
  -4   5  -7 624.648 184.135  16 
  -4   5  -7 578.917 176.988  14 
  -4   5  -7 675.958 247.719  21 
  -4   5  -7 533.149 167.648  15 
   4  -5   7 505.575 154.647  10 
   4   5   7 562.282 201.892  24 
   4   5   8 344.295 130.395  21 
  -4   5  -8 366.084 172.055  16 
   4   5   8 542.218 181.486  24 
  -4   5  -8 244.009 87.0349  21 
  -4   5  -8 316.347 118.824  14 
  -4   5  -8 440.943 145.190  15 
   4  -5   8 366.121 140.051  10 
   4   5   8 247.093 133.729  25 
   4   5   9 1102.56 263.266  24 
  -4   5  -9 1306.40 271.070  15 
   4   5   9 1312.90 277.778  21 
  -4   5  -9 1361.76 300.956  16 
  -4   5  -9 1091.59 265.647  21 
   4   5   9 668.900 205.106  25 
   4  -5   9 1361.61 260.925  10 
   4   5  10 7998.37 693.921  24 
  -4   5 -10 7047.52 636.650  15 
   4   5  10 6739.45 625.868  25 
  -4   5 -10 7041.48 697.949  21 
   4  -5  10 8004.81 642.290  10 
  -4   5 -10 9166.72 770.023  16 
   4   5  10 8894.95 727.957  21 
   4   5  11 4.44103 22.9867  21 
   4  -5  11-35.9234 26.3582  10 
  -4   5 -11 1.20557 18.2319  16 
  -4   5 -11 23.2720 62.9326  15 
  -4   5 -12 374.563 128.559  15 
  -4   5 -12 481.844 193.928  16 
   4  -5  12 358.175 130.616  10 
   4   5  12 342.933 135.641  21 
   4  -5  13 4909.57 477.770  10 
  -4   5 -13 4393.41 469.044  15 
  -4   5 -13 5366.16 523.668  16 
   4  -5  14 407.479 150.309  10 
  -4   5 -14 351.974 134.580  15 
  -4   5 -14 349.941 118.255  16 
   4  -5  15 399.286 132.320  10 
  -4   5 -15 287.496 102.583  15 
  -4   5 -16-22.5586 26.5319  15 
   4  -5  16-28.0098 35.2321  10 
   4  -5  17 1759.74 236.310  10 
  -4   5 -17 1778.88 245.893  15 
  -4   5 -18 1884.50 228.862  15 
   4  -5  18 1673.61 221.345  10 
   4   6 -15 3096.39 314.066  22 
   4   6 -15 3298.36 325.775  11 
  -4   6  14 293.480 110.286  24 
   4   6 -14 538.658 145.343  22 
   4   6 -14 518.405 140.721  11 
  -4   6  14 372.764 105.330  25 
   4   6 -13 1738.10 263.331  22 
  -4  -6  13 1269.05 182.778  13 
   4   6 -13 1675.37 266.886  11 
  -4   6  13 1452.81 245.975  25 
  -4   6  13 1302.68 250.420  24 
   4   6 -12 282.964 120.434  22 
  -4  -6  12 350.207 104.129  13 
   4   6 -12 275.781 121.208  11 
  -4   6  12 350.446 142.254  24 
  -4   6  12 215.774 101.308  25 
  -4  -6  11 4292.48 385.310  13 
   4   6 -11 4693.91 474.449  22 
  -4   6  11 4650.63 512.844  24 
  -4   6  11 4200.83 472.380  25 
   4   6 -11 4480.85 470.660  11 
  -4   6  10 3419.35 477.083  24 
  -4   6  10 3697.97 430.343  21 
  -4  -6  10 3820.36 373.626  13 
  -4   6  10 3796.36 471.640  25 
   4   6 -10 4428.99 475.050  11 
   4   6 -10 4287.36 471.014  22 
  -4   6   9 545.142 190.065  25 
  -4  -6   9 611.761 154.950  13 
   4   6  -9 651.408 205.913  11 
   4   6  -9 733.356 204.818  22 
  -4   6   9 937.721 232.347  24 
  -4   6   9 781.749 205.243  21 
  -4   6   8 482.121 160.277  21 
  -4   6   8 506.920 166.471  24 
   4   6  -8 381.176 141.978  22 
   4   6  -8 372.914 127.648  21 
   4   6  -8 368.522 147.528  11 
  -4   6   8 336.114 127.142  25 
   4   6  -7 957.666 230.473  21 
  -4   6   7 681.087 201.100  24 
  -4   6   7 709.262 217.827  21 
   4   6  -7 1375.54 274.599  22 
   4   6  -7 812.121 219.913  11 
  -4   6   7 771.364 226.325  25 
  -4   6   6 279.835 156.021  24 
   4   6  -6 245.734 107.419  22 
  -4   6   6 73.1287 51.0301  21 
   4   6  -6 171.396 93.3467  21 
   4   6  -6 236.949 130.032  11 
  -4   6   6 169.421 76.9769  16 
  -4   6   6 193.070 130.640  25 
   4   6  -5 3401.84 438.608  22 
   4   6  -5 2970.00 406.675  11 
   4   6  -5 3630.76 493.698  21 
  -4   6   5 3433.43 507.551  24 
  -4   6   5 3278.02 484.537  21 
  -4   6   5 3330.80 406.372  16 
  -4   6   5 3370.35 486.366  25 
  -4   6   4 4371.53 572.294  24 
  -4   6   4 5399.62 544.261  16 
   4   6  -4 4565.46 547.555  21 
  -4   6   4 4213.20 583.053  21 
  -4   6   4 4339.28 553.998  25 
   4   6  -4 4742.76 516.259  11 
   4   6  -4 4073.02 473.482  22 
  -4   6   3 8665.29 809.428  24 
  -4   6   3 8939.07 846.793  21 
   4   6  -3 11901.8 922.715  21 
   4   6  -3 10082.0 763.478  11 
   4   6  -3 10092.3 753.593  22 
  -4   6   3 8784.68 722.705  16 
  -4   6   3 9847.69 847.539  25 
  -4   6   2 698.889 188.835  16 
  -4   6   2 762.625 212.794  14 
   4   6  -2 649.407 165.382  22 
   4   6  -2 733.565 232.011  21 
  -4   6   2 768.562 238.619  25 
   4   6  -2 511.604 169.958  11 
  -4   6   2 747.519 261.423  24 
  -4   6   2 667.118 225.495  21 
  -4   6   1 730.960 203.381  16 
   4   6  -1 934.590 263.874  24 
  -4   6   1 1093.55 254.717  14 
   4   6  -1 929.879 259.340  21 
  -4   6   1 813.472 256.052  21 
   4   6  -1 546.195 166.066  11 
  -4   6   1 560.011 175.446  25 
  -4   6   1 668.483 193.028  24 
   4   6  -1 721.839 183.204  22 
   4   6  -1 895.050 240.148  25 
  -4   6   0 4348.07 547.711  24 
   4   6   0 6666.78 656.954  24 
   4   6   0 4441.61 563.794  21 
  -4   6   0 4519.98 527.090  16 
   4  -6   0 4567.02 461.349  10 
  -4   6   0 5088.24 637.662  21 
   4   6   0 4600.04 468.612  22 
  -4   6   0 4749.52 540.422  14 
   4   6   0 4299.26 455.701  11 
   4   6   0 6049.02 627.399  25 
  -4   6   0 4547.69 550.029  25 
  -4   6  -1 2057.63 367.611  24 
   4   6   1 2274.14 371.890  24 
   4   6   1 1943.10 285.221  22 
  -4   6  -1 2050.56 351.662  14 
  -4   6  -1 2329.67 393.283  25 
   4   6   1 2726.09 433.924  21 
  -4   6  -1 1882.30 351.912  16 
   4  -6   1 2109.77 295.146  10 
  -4   6  -1 2115.73 424.140  21 
   4   6   1 1983.68 299.041  11 
   4   6   1 2412.01 378.442  25 
  -4   6  -2 448.522 176.634  24 
   4   6   2 681.591 219.433  24 
   4   6   2 316.253 145.871  21 
  -4   6  -2 592.560 171.818  14 
  -4   6  -2 409.728 190.482  21 
   4  -6   2 535.428 159.781  10 
  -4   6  -2 533.162 179.512  16 
   4   6   2 700.115 209.419  25 
  -4   6  -2 591.154 195.559  25 
  -4   6  -3 1067.57 242.516  24 
  -4   6  -3 778.558 167.944  15 
   4  -6   3 1039.06 214.825  10 
   4   6   3 1280.42 261.144  25 
   4   6   3 1233.74 301.673  21 
  -4   6  -3 896.268 250.711  21 
  -4   6  -3 757.540 247.901  25 
  -4   6  -3 928.375 248.777  16 
   4   6   3 1334.69 285.914  24 
  -4   6  -4-32.1251 38.1336  24 
   4   6   4 51.8276 102.492  24 
   4  -6   4 42.0307 12.9260  10 
  -4   6  -4 53.9969 43.9615  15 
   4   6   4 114.740 43.8148  21 
   4   6   4 99.1415 99.3827  25 
  -4   6  -4 72.7903 94.5673  16 
  -4   6  -4 177.790 115.630  21 
  -4   6  -4-77.3478 71.7710  25 
   4  -6   5 440.776 139.658  10 
  -4   6  -5 280.199 128.686  24 
   4   6   5 486.425 188.600  21 
   4   6   5 509.230 191.113  24 
  -4   6  -5 482.598 138.294  15 
  -4   6  -5 329.125 151.435  16 
  -4   6  -5 461.102 155.839  25 
  -4   6  -5 326.471 138.146  21 
   4   6   5 761.531 194.987  25 
   4   6   6 732.176 205.541  25 
  -4   6  -6 784.901 215.103  16 
   4   6   6 726.440 227.129  24 
  -4   6  -6 721.193 171.851  15 
   4   6   6 833.916 224.986  21 
  -4   6  -6 746.341 238.895  21 
   4  -6   6 659.598 163.222  10 
   4   6   7 333.187 99.7531  24 
  -4   6  -7 673.391 206.862  21 
   4   6   7 328.387 134.730  21 
  -4   6  -7 341.957 153.445  16 
   4  -6   7 352.206 107.386  10 
   4   6   7 474.965 169.238  25 
  -4   6  -7 325.445 103.822  15 
   4   6   8 218.361 106.222  24 
  -4   6  -8 285.072 135.599  21 
   4   6   8 143.643 97.6030  21 
  -4   6  -8 296.397 140.925  16 
  -4   6  -8 250.712 113.797  15 
   4  -6   8 140.912 57.6705  10 
   4   6   8 127.238 90.3519  25 
  -4   6  -9 111.557 85.8831  15 
  -4   6  -9 159.535 102.935  21 
   4   6   9 124.115 78.4471  21 
  -4   6  -9 178.404 101.024  16 
   4  -6   9 195.335 82.7422  10 
  -4   6 -10 1340.69 217.806  15 
  -4   6 -10 1378.10 244.369  16 
   4   6  10 812.800 180.982  21 
   4  -6  10 1130.08 201.891  10 
   4   6  11 83.4315 72.1547  21 
  -4   6 -11 184.999 85.0227  15 
  -4   6 -11 183.931 94.7096  16 
   4  -6  11 251.060 93.6833  10 
  -4   6 -12 1247.31 213.547  16 
   4  -6  12 1075.98 180.751  10 
  -4   6 -12 1013.67 183.660  15 
   4  -6  13 222.646 86.3617  10 
  -4   6 -13 178.361 78.5186  22 
  -4   6 -13 374.418 101.701  15 
  -4   6 -14 238.738 87.9984  15 
  -4   6 -14 174.647 70.6001  22 
   4  -6  14 264.186 83.9150  10 
  -4   7   7 1566.54 230.010  24 
  -4   7   7 1241.23 208.867  25 
  -4  -7   7 987.370 159.437  13 
   4   7  -6 1032.58 193.028  22 
  -4   7   6 1419.43 216.264  24 
  -4  -7   6 1093.94 173.681  13 
  -4   7   6 1437.78 228.249  21 
   4   7  -6 1302.68 214.466  11 
  -4   7   6 1699.41 242.012  25 
  -4   7   5 798.248 171.986  24 
   4   7  -5 508.374 133.550  22 
   4   7  -5 551.727 139.440  11 
  -4  -7   5 280.595 94.5302  13 
   4   7  -5 990.907 177.846  21 
  -4   7   5 798.165 178.679  25 
  -4   7   5 795.155 188.677  21 
  -4   7   4 409.297 119.035  25 
  -4   7   4 463.258 127.031  24 
  -4   7   4 185.633 106.394  21 
   4   7  -4 114.611 66.7481  22 
  -4  -7   4 117.445 56.6829  13 
   4   7  -4 51.7604 33.4554  11 
   4   7  -4 452.114 134.512  21 
  -4   7   3 1743.70 272.532  21 
   4   7  -3 2113.60 281.827  21 
  -4   7   3 1738.80 260.694  24 
  -4   7   3 1910.67 265.372  25 
  -4   7   2 5091.75 449.140  24 
   4   7  -2 5844.86 493.839  21 
  -4   7   2 5492.44 506.458  21 
  -4   7   2 4004.39 402.302  25 
   4  -7  -2 3109.63 276.732  10 
  -4   7   1 4384.79 417.564  24 
  -4   7   1 4259.62 362.012  16 
   4   7  -1 5126.07 468.278  21 
  -4   7   1 4401.78 462.080  21 
  -4   7   1 4017.35 405.861  25 
  -4   7   0 2227.83 287.325  24 
  -4   7   0 2362.65 275.745  16 
  -4   7   0 2065.04 320.051  21 
   4  -7   0 1679.37 196.469  10 
  -4   7   0 1854.89 264.463  25 
   4   7   0 2682.86 338.841  21 
  -4   7  -1 1041.48 184.750  16 
  -4   7  -1 869.966 208.672  21 
  -4   7  -1 831.205 167.820  25 
   4   7   1 947.804 201.826  21 
  -4   7  -1 817.879 163.687  24 
   4  -7   1 801.825 134.708  10 
  -4   7  -2 1303.36 249.729  21 
   4   7   2 1218.97 217.935  21 
  -4   7  -2 1360.82 211.734  16 
   4  -7   2 1268.68 170.067  10 
   4   7   3 925.905 191.603  21 
  -4   7  -3 924.128 177.419  16 
  -4   7  -3 673.875 174.379  21 
   4  -7   3 701.356 125.067  10 
   4   7   4 27.3577 51.5976  21 
  -4   7  -4 83.6353 86.3521  21 
  -4   7  -4 7.43341 26.9916  16 
  -4   7  -5 251.973 79.2055  16 
   4   7   5 132.014 86.4976  21 
  -4   7  -6 120.652 72.4983  16 
  -5   0  27 1389.81 256.711  26 
  -5   0  26-9.67771 23.9770   8 
  -5   0  26-9.68332 45.9719  20 
  -5   0  26 92.8397 77.4726  26 
  -5   0  25 4784.74 442.908  20 
  -5   0  25 4344.03 407.092   8 
  -5   0  25 3405.53 514.073  26 
  -5   0  24 20.2995 40.4019  20 
  -5   0  24-7.79453 26.6598  26 
  -5   0  23 396.835 171.374  10 
  -5   0  23 447.937 159.505  20 
  -5   0  23 512.509 221.406  26 
  -5   0  22-10.8438 19.6140  10 
  -5   0  22-102.549 92.3175  20 
  -5   0  21 4922.39 549.444  20 
  -5   0  21 5179.02 573.571  10 
  -5   0  20-1.19760 53.9305  20 
  -5   0  20-14.6472 74.5018  10 
  -5   0  19 1693.43 272.484  13 
  -5   0  19 1847.51 336.724  20 
   5   0 -19 1984.47 243.849  19 
  -5   0  19 1729.69 321.587  10 
  -5   0  18 6.79116 50.2431  10 
  -5   0  18 25.6771 28.1186  13 
  -5   0  18-21.6069 44.1752  20 
  -5   0  17 116.226 68.7399  13 
  -5   0  17 51.6064 21.5679  20 
  -5   0  16 55.3703 51.3122  13 
  -5   0  16-69.0649 74.6444  20 
  -5   0  16 72.1152 49.4535  10 
  -5   0  15 12015.5 1996.65   2 
  -5   0  15 12580.4 726.196  13 
  -5   0  15 13547.4 829.795  20 
  -5   0  15 13507.7 2117.77   3 
   5   0 -15 13071.8 1281.79   1 
  -5   0  15 13295.6 808.442  10 
   5   0 -14 50.4597 63.6836   1 
  -5   0  14 41.5563 50.8192  20 
  -5   0  14 236.740 134.370   2 
  -5   0  14 30.0063 368.262   3 
  -5   0  14-25.0339 52.2838  13 
  -5   0  14-31.6063 52.1529  10 
  -5   0  13 4574.81 1087.93   2 
  -5   0  13 5287.48 415.861  13 
  -5   0  13 5337.72 467.415  20 
  -5   0  13 5808.04 469.790  10 
  -5   0  13 4817.05 1100.17   3 
   5   0 -13 4798.07 729.646   1 
  -5   0  12-60.8925 206.592   2 
  -5   0  12 80.9765 174.282   3 
  -5   0  12-30.4740 16.1924  13 
   5   0 -12-54.9644 100.252   1 
  -5   0  12 0.68507 45.6165  10 
  -5   0  12 72.4797 50.9398  20 
  -5   0  11 97201.8 4833.46   3 
  -5   0  11 93255.2 2365.81  13 
   5   0 -11 94496.8 3406.41   1 
  -5   0  11 94874.7 2479.72  20 
  -5   0  11 90695.3 2433.12  10 
  -5   0  11 103118. 4921.21   2 
  -5   0  10-48.4525 78.6258   2 
   5   0 -10 100.387 140.166   1 
  -5   0  10-87.1783 182.961   3 
  -5   0   9 14848.9 1557.73   2 
  -5   0   9 11326.8 1387.98   3 
   5   0  -9 11985.3 983.120   1 
  -5   0   8-61.3847 61.6553   2 
  -5   0   8-2.97278 105.021   3 
   5   0  -8 20.0307 40.3600   1 
  -5   0   7 3388.41 631.921   2 
   5   0  -7 3811.01 502.947   1 
  -5   0   7 4420.56 742.523   3 
   5   0  -6-88.4513 83.7639   5 
  -5   0   6-53.8018 41.7428   2 
   5   0  -6-20.8165 34.3500   1 
  -5   0   6 72.9552 104.231   3 
   5   0  -5 740.230 197.655   5 
   5   0  -5 694.941 196.023   1 
  -5   0   5 651.844 300.347   3 
  -5   0   5 613.199 256.044   2 
  -5   0   4-58.0394 92.3292   3 
   5   0  -4 35.2054 60.5423   1 
   5   0  -4-0.98051 93.2296   5 
  -5   0   4 48.7295 65.9202   2 
  -5   0   3 27117.4 1321.43   1 
  -5   0   3 24097.7 1416.23   2 
   5   0  -3 23392.9 1172.43   5 
  -5   0   3 24919.5 1434.97   3 
   5   0  -3 25516.6 1229.28   1 
  -5   0   2 32.0860 62.5491   2 
  -5   0   2 81.0222 120.767   3 
   5   0  -2 1.07624 66.5349   5 
  -5   0   2 10.2046 43.8912   1 
   5   0  -2 19.3870 48.3268   1 
  -5   0   1 188574. 5198.03   5 
  -5   0   1 196606. 4926.34   1 
   5   0  -1 196251. 4750.86   1 
   5   0   0 4.08226 28.5974   2 
  -5   0   0-55.8136 101.611   5 
   5   0   0-9.69996 35.8425   4 
  -5   0   0 119.486 82.8023   1 
   5   0   0 31.2315 41.4194   3 
   5   0   0 77.3711 55.4495   1 
  -5   0  -1 15545.5 1230.93   5 
   5   0   1 16109.3 927.647   1 
   5   0   1 17543.1 999.728   4 
  -5   0  -1 17521.4 1012.55   1 
  -5   0  -2-67.3162 157.079   5 
   5   0   2 29.7275 69.6070   1 
   5   0   2-23.8134 35.6373   4 
  -5   0  -2 14.3251 27.8670   1 
  -5   0  -3 124177. 3474.66   1 
   5   0   3 117593. 3311.48   1 
   5   0   3 120113. 3477.00   4 
   5   0   4-12.7488 54.8514   4 
   5   0   4 170.827 99.2165   1 
   5   0   5 30781.7 1580.07   4 
   5   0   5 32847.3 1463.45   1 
   5   0   6-21.8414 51.4852   4 
   5   0   6 33.4011 84.8028   1 
   5   0   7 13352.4 930.869   1 
   5   0   7 14599.0 1140.48   4 
   5   0   8-3.87495 63.0880   1 
   5   0   8-51.6202 88.5212   4 
   5   0   9 19888.5 853.158  23 
   5   0   9 18608.3 908.976  27 
   5   0   9 20529.3 1483.97   4 
   5   0   9 19225.1 880.696  18 
   5   0   9 20245.8 808.847  12 
   5   0   9 20556.5 1231.48   1 
   5   0  10-41.6304 41.0109  12 
   5   0  10-46.0700 30.1118  18 
   5   0  10-0.82290 30.9349  27 
   5   0  10-44.8017 76.4162   1 
   5   0  10 21.2998 33.1372  23 
   5   0  11 852.876 255.016   1 
   5   0  11 785.070 155.918  23 
   5   0  11 775.895 186.512  18 
   5   0  11 678.192 288.961   3 
   5   0  11 744.543 135.031  10 
   5   0  11 876.188 160.489  12 
   5   0  11 882.604 192.771  27 
   5   0  11 900.991 368.807   2 
   5   0  12-16.6216 41.4898  18 
   5   0  12-52.6953 141.828   1 
   5   0  12-46.1157 42.6129  27 
   5   0  12 65.7648 78.7830  12 
   5   0  12-23.9321 33.3281  23 
   5   0  12 69.6106 56.6288  10 
   5   0  12 245.545 250.785   3 
   5   0  12 213.221 200.116   2 
   5   0  13 3775.76 408.742  18 
   5   0  13 4009.76 462.493  27 
   5   0  13 3362.70 360.195  23 
   5   0  13 3572.04 343.112  10 
   5   0  13 3244.32 355.943  12 
   5   0  14 4.23382 46.4406  12 
   5   0  14-74.8861 49.5370  23 
   5   0  14 8.39506 33.2788  18 
   5   0  14-21.5528 26.2580  10 
   5   0  14 36.8146 65.5771  27 
   5   0  15 419.462 138.587  23 
   5   0  15 312.149 112.066  12 
   5   0  15 388.399 135.016  18 
   5   0  15 475.958 119.996  10 
   5   0  15 500.078 171.321  27 
   5   0  16 58.0064 46.4463  12 
   5   0  16 29.1765 62.9214  10 
   5   0  16 51.8075 104.092  18 
   5   0  16 52.1814 57.9683  23 
   5   0  16-101.069 96.6443  27 
   5   0  17 2420.86 347.718  12 
   5   0  17 2326.30 322.361  10 
   5   0  17 2313.53 337.046  23 
   5   0  17 2563.71 406.516  27 
   5   0  17 2439.65 354.450  18 
   5   0  18 10.4973 76.7035  18 
   5   0  18 8.32080 48.5042  12 
   5   0  18 53.3586 72.0844  10 
   5   0  18-13.6939 73.9661  27 
   5   0  19 9737.92 677.061  10 
   5   0  19 10838.4 769.947  18 
   5   0  20 97.4964 94.6705  18 
   5   0  20-59.4496 55.1278  10 
  -5   0 -20-96.7828 89.3660   9 
  -5   0 -21 29681.3 1383.37   9 
   5   0  21 28794.9 1268.02  18 
  -5   0 -22 59.8396 63.4826   9 
   5   0  22 46.1691 46.6923  18 
   5   0  23 8997.36 594.436  18 
   5   0  23 6839.22 588.668  20 
   5   0  24 28.8239 47.7155  20 
   5   0  24-51.2677 41.0371  18 
   5   0  25 13371.3 712.680  20 
  -5  -1  27 1041.31 168.092   8 
  -5   1  27 1250.76 186.701  20 
  -5  -1  27 829.667 193.271  26 
  -5   1  26 1707.63 240.443  20 
  -5  -1  26 910.609 232.578  26 
  -5   1  26 1069.75 258.373  26 
  -5  -1  26 1004.17 182.216   8 
  -5   1  25 4497.54 437.990  20 
  -5   1  25 3409.63 321.530   8 
  -5  -1  25 3077.35 475.166  26 
  -5   1  25 4069.79 506.441  26 
  -5  -1  25 4331.18 384.292  20 
  -5  -1  25 4130.22 444.240  10 
  -5  -1  24 1169.96 246.904  10 
  -5  -1  24 776.641 259.170  26 
  -5   1  24 1037.27 191.175   8 
   5   1 -24 982.594 162.472  19 
  -5   1  24 1155.23 234.137  20 
  -5  -1  24 1019.74 203.383  20 
  -5   1  24 864.778 263.992  26 
  -5   1  23 1962.63 317.918  20 
  -5   1  23 1999.09 289.319   8 
  -5  -1  23 1520.71 260.482  20 
   5   1 -23 2129.02 255.872  19 
  -5  -1  23 1794.88 325.159  10 
  -5   1  23 1662.72 380.752  26 
  -5  -1  22 2785.46 402.929  10 
   5   1 -22 3269.36 335.039  19 
  -5   1  22 2964.96 364.087   8 
  -5   1  22 2892.23 413.955  20 
  -5  -1  22 3072.61 377.154  20 
  -5   1  22 2717.44 493.684  26 
  -5   1  21 200.998 92.9862   8 
  -5   1  21 243.802 134.408  20
[truncated: 935,306 more chars]
